# Supplementary material for: Recovering Protein-Protein and Domain-Domain Interactions from Aggregation of IP-MS Proteomics of Coregulator Complexes
Source: PLoS Comput Biol. 2011 Dec 29;7(12):e1002319. doi: 10.1371/journal.pcbi.1002319 (PMC3248428; doi:10.1371/journal.pcbi.1002319)
Supplement: Dataset S1 — Information on each IP/MS experiment, quantity of proteins purified in each IP/MS experiment, size of protein lists purified in each IP/MS experiment, list of sticky proteins. (XLSX) [file pcbi.1002319.s001.xlsx]

## Sheet: Statistics
Experiments Statistics
Entity	Counts
Experiments	3290
Records in experiment-2-gene	407000
Antibodies	1796
Antigens (Baits)	1083
Antibodies with redundent antigen targets	419
Antigenes used in more than one experiments	25
Records in antibody-2-gene (ab2gene)	315245
Total Gene products	11485
Gene products recovered in 1 antibody IP (non-reciprocal)	3666
Gene products recovered in 2-4 antibodies (low reciprocal occurences)	3271
Gene products recovered in 5-10 antibodies	1708
Gene products recovered in 10-20 antibodies	931
Gene products recovered in >20 antibodies	1909
Non-specific proteins (Blacklist)	290

## Sheet: Experiments
ExpID	Antibody	Intended Antigen	Other Putative Antigens	Cell Line	Fraction	Genotype	Treatment	IP Date
1	BL2608	HDAC1		HeLa S3	Nuclear Extract	WT	none	2007-04-06
2	BL2667	HDAC2		HeLa S3	Nuclear Extract	WT	none	2007-04-06
3	BL1760	CTBP1		HeLa S3	Nuclear Extract	WT	none	2007-04-06
4	BL1761	CTBP1		HeLa S3	Nuclear Extract	WT	none	2007-04-06
5	BL2731	SIN3A		HeLa S3	Nuclear Extract	WT	none	2007-04-23
6	BL2729	SIN3A		HeLa S3	Nuclear Extract	WT	none	2007-05-02
7	BL2728	SIN3A	PSME3(10197), WTAP(9589)	HeLa S3	Nuclear Extract	WT	none	2007-04-23
8	BL1739	CARM1		HeLa S3	Nuclear Extract	WT	none	2007-04-12
9	BL443	EP300	MDC1(9656), NEDD1(121441), TUBGCP3(10426)	HeLa S3	Nuclear Extract	WT	none	2007-04-11
10	BL440	CREBBP	CSNK2A2(1459), PAWR(5074)	HeLa S3	Nuclear Extract	WT	none	2007-04-11
11	BL1743	CDK7	C12orf10(60314), MAP1S(55201)	HeLa	Nuclear Extract	WT	none	2007-04-23
12	BL2844	MED12		HeLa S3	Nuclear Extract	WT	none	2007-04-11
13	BL2848	MED28		HeLa S3	Nuclear Extract	WT	none	2007-04-11
14	BL2850	MED28		HeLa S3	Nuclear Extract	WT	none	2007-04-11
15	BL1805	MTA1		HeLa S3	Nuclear Extract	WT	none	2007-05-02
16	BL1803	MTA1		HeLa S3	Nuclear Extract	WT	none	2007-05-02
17	BL2583	NCOR1	EP300(2033), SMARCA4(6597)	HeLa S3	Nuclear Extract	WT	none	2007-05-02
18	BL2587	NCOR2	MVP(9961), TFG(10342)	HeLa S3	Nuclear Extract	WT	none	2007-05-02
19	BL2588	NCOR2		HeLa S3	Nuclear Extract	WT	none	2007-05-02
20	BL2784	PARK7	MTA2(9219)	HeLa S3	Nuclear Extract	WT	none	2007-05-07
21	BL2693	PRMT1	ANKRD62(342850), HNRNPU(3192), THOC4(10189)	HeLa S3	Nuclear Extract	WT	none	2007-04-12
22	BL1039	RCOR1		HeLa S3	Nuclear Extract	WT	none	2007-05-02
23	BL462	RBM39	C14orf4(64207), SRRM2(23524)	HeLa S3	Nuclear Extract	WT	none	2007-04-23
24	BL2445	SAFB	GSTP1(2950), SAFB2(9667)	HeLa S3	Nuclear Extract	WT	none	2007-05-07
28	BL1734	TBL1XR1	ABCF1(23), TP53BP1(7158)	HeLa S3	Nuclear Extract	WT	none	2007-05-02
29	BL2748	SNW1	C14orf43(91748), RIF1(55183)	HeLa S3	Nuclear Extract	WT	none	2007-05-11
30	BL2593	RPL7A	DDX21(9188)	HeLa S3	Nuclear Extract	WT	none	2007-06-01
31	BL2151	TPR		HeLa S3	Nuclear Extract	WT	none	2007-04-11
32	BL2150	TPR		HeLa S3	Nuclear Extract	WT	none	2007-04-11
33	BL2459	DDX17		HeLa S3	Nuclear Extract	WT	none	2007-05-23
34	BL2461	DDX5		HeLa S3	Nuclear Extract	WT	none	2007-05-23
35	BL2127	HDAC3		HeLa S3	Nuclear Extract	WT	none	2007-04-06
36	BL1576	ESCO1	ZMYND8(23613)	HeLa S3	Nuclear Extract	WT	none	2007-05-21
37	a-ATR (YW)	ATR	PIBF1(10464), TPR(7175), VASP(7408)	HeLa S3	Nuclear Extract	WT	none	2007-05-21
38	BL57	HELLS	QKI(9444)	HeLa S3	Nuclear Extract	WT	none	2007-05-11
39	BL1704	PHB2	ANKRD62(342850), KIAA1033(23325)	HeLa S3	Nuclear Extract	WT	none	2007-05-07
40	BL1871	NCOA6		HeLa S3	Nuclear Extract	WT	none	2007-05-02
41	BL1868	TRIP4	CCNK(8812)	HeLa S3	Nuclear Extract	WT	none	2007-04-06
42	BL2439	RBM9	A2BP1(54715), ZMYND8(23613)	HeLa S3	Nuclear Extract	WT	none	2007-04-23
43	BL2130	RBM15		HeLa S3	Nuclear Extract	WT	none	2007-04-23
44	BL434	NCOA1	KCTD3(51133), NF1(4763), TPD52L2(7165), WDHD1(11169)	HeLa S3	Nuclear Extract	WT	none	2007-04-25
45	BL435	NCOA1	CAD(790), TP53BP1(7158), TPD52L2(7165), WDHD1(11169)	HeLa	Nuclear Extract	WT	none	2007-04-25
46	BL2148	TPR		HeLa S3	Nuclear Extract	WT	none	2007-04-11
47	BL2149	TPR		HeLa S3	Nuclear Extract	WT	none	2007-04-11
50	BL1011	ZHX1		HeLa S3	Nuclear Extract	WT	none	2007-05-11
51	BL1031	ZMYM3	ZMYM2(7750)	HeLa S3	Nuclear Extract	WT	none	2007-05-11
52	BL437	NCOA2	CCDC91(55297)	HeLa S3	Nuclear Extract	WT	none	2008-02-01
53	BL436	NCOA2	GAPVD1(26130), SMARCC2(6601), SPAG9(9043), USO1(8615)	HeLa S3	Nuclear Extract	WT	none	2008-02-01
54	BL1575	CDC2L6	CDC2L1(984), CDC2L2(728642)	HeLa S3	Nuclear Extract	WT	none	2007-05-02
55	BL2431	NCOA5		HeLa S3	Nuclear Extract	WT	none	2007-05-21
57	SC-28236	BAP1		HeLa S3	Nuclear Extract	WT	none	2007-06-01
58	BL437	NCOA2	CCDC91(55297)	HeLa S3	Cytosolic	WT	none	2008-02-01
59	BL436	NCOA2	GAPVD1(26130), SMARCC2(6601), SPAG9(9043), USO1(8615)	HeLa S3	Cytosolic	WT	none	2008-02-01
60	a-PTEN (WG)	PTEN		HeLa	Cytosolic	WT	none	2007-04-01
61	BL1871	NCOA6		HeLa S3	Nuclear Extract	WT	HU	2006-11-06
62	BL1871	NCOA6		HeLa S3	Nuclear Extract	WT	IR	2006-11-07
65	AB80	BRCA1	ANAPC1(64682)	MCF7	Nuclear Extract	WT	none	2007-05-31
66	AB81	BRCA1	RFX5(5993)	MCF7	Nuclear Extract	WT	none	2007-05-31
76	BL2378	RFWD3	LUZP1(7798), SPAG9(9043), TBC1D5(9779)	HeLa S3	Nuclear Extract	WT	none	2006-02-08
77	BL2378	RFWD3	LUZP1(7798), SPAG9(9043), TBC1D5(9779)	HeLa S3	Nuclear Extract	WT	HU	2006-02-08
78	BL2378	RFWD3	LUZP1(7798), SPAG9(9043), TBC1D5(9779)	HeLa S3	Nuclear Extract	WT	IR	2006-02-08
79	BL2290	BTBD12	ESPL1(9700), TRIM32(22954)	HeLa S3	Nuclear Extract	WT	none	2008-02-01
80	BL2290	BTBD12	ESPL1(9700), TRIM32(22954)	HeLa S3	Nuclear Extract	WT	HU	2008-02-01
81	BL2290	BTBD12	ESPL1(9700), TRIM32(22954)	HeLa S3	Nuclear Extract	WT	IR	2008-02-01
83	BL4004	USP15	SART3(9733)	HeLa S3	Cytosolic	WT	none	2007-04-25
84	BL4004	USP15	SART3(9733)	MCF7	Nuclear Extract	WT	none	2007-04-25
85	BL4004	USP15	SART3(9733)	MCF7	Cytosolic	WT	none	2007-04-25
103	BL2751	SNW1		HeLa S3	Nuclear Extract	WT	none	2007-06-07
104	BL1012	ZHX1		HeLa S3	Nuclear Extract	WT	none	2007-06-07
105	BL1031	ZMYM3	ZMYM2(7750)	HeLa S3	Nuclear Extract	WT	none	2007-06-07
106	BL1014	INTS3		HeLa S3	Nuclear Extract	WT	none	2007-07-13
107	BL1019	INTS5	AFAP1(60312)	HeLa S3	Nuclear Extract	WT	none	2007-07-13
108	BL996	INTS1		HeLa S3	Nuclear Extract	WT	none	2007-07-13
121	BL438	NCOA3		HeLa S3	Nuclear Extract	WT	none	2007-09-10
126	BL2693	PRMT1	ANKRD62(342850), HNRNPU(3192), THOC4(10189)	HeLa S3	Nuclear Extract	WT	none	2007-06-20
135	BL2378	RFWD3	LUZP1(7798), SPAG9(9043), TBC1D5(9779)	HeLa S3	Nuclear Extract	WT	none	2006-02-08
137	BL2378	RFWD3	LUZP1(7798), SPAG9(9043), TBC1D5(9779)	HeLa S3	Nuclear Extract	WT	HU	2006-02-08
139	BL1019	INTS5	AFAP1(60312)	HeLa S3	Nuclear Extract	WT	none	2007-09-14
140	BL4505	SMARCAD1		HeLa S3	Nuclear Extract	WT	none	2007-09-14
141	BL4506	SMARCAD1		HeLa S3	Nuclear Extract	WT	none	2007-09-14
142	BL4224	BPTF	PAF1(54623), TPR(7175)	HeLa S3	Nuclear Extract	WT	none	2007-09-14
152	BL2450	SMARCE1		HeLa S3	Nuclear Extract	WT	none	2007-05-02
153	BL2447	SMARCA4		HeLa S3	Nuclear Extract	WT	none	2007-05-02
157	BL4545	HMG20B		HeLa S3	Nuclear Extract	WT	none	2007-09-14
158	BL4548	HMG20B		HeLa S3	Nuclear Extract	WT	none	2007-09-14
159	BL4547	HMG20B		HeLa S3	Nuclear Extract	WT	none	2007-09-14
160	BL4546	HMG20B	FYCO1(79443)	HeLa S3	Nuclear Extract	WT	none	2007-09-14
161	BL434	NCOA1	KCTD3(51133), NF1(4763), TPD52L2(7165), WDHD1(11169)	HeLa	Nuclear Extract	WT	none	2007-04-25
162	BL446	UBE3A	CD2AP(23607)	HeLa S3	Nuclear Extract	WT	none	2007-06-20
163	SC-28236	BAP1		HeLa S3	Nuclear Extract	WT	none	2007-07-12
164	BL2447	SMARCA4		HeLa S3	Nuclear Extract	WT	none	2007-06-20
165	BL1545	TTK		HeLa S3	Nuclear Extract	WT	none	2007-08-27
166	BL1545	TTK		HeLa S3	Cytosolic	WT	none	2007-08-27
167	BL435	NCOA1	CAD(790), TP53BP1(7158), TPD52L2(7165), WDHD1(11169)	HeLa S3	Nuclear Extract	WT	none	2007-04-25
169	SC-1751	TIA1	SRI(6717)	HeLa S3	Nuclear Extract	WT	none	2007-08-29
170	SC-1751	TIA1	SRI(6717)	HeLa S3	Cytosolic	WT	none	2007-08-29
171	SC-1751	TIA1	SRI(6717)	HeLa S3	Nuclear Pellet	WT	none	2007-08-29
172	SC-1751	TIA1	SRI(6717)	HeLa S3	Nuclear Extract	WT	none	2007-09-10
173	SC-1751	TIA1	SRI(6717)	HeLa S3	Cytosolic	WT	none	2007-09-10
174	BL1545	TTK		HeLa S3	Nuclear Extract	WT	none	2007-09-17
175	BL439	NCOA3		MCF7	Nuclear Extract	WT	none	2007-09-20
176	BL439	NCOA3		HeLa S3	Cytosolic	WT	none	2007-09-18
177	BL439	NCOA3		MCF7	Cytosolic	WT	none	2007-09-20
178	a-REGy	PSME3	TRIP13(9319)	HeLa S3	Nuclear Extract	WT	none	2007-07-13
179	CBC622	ZNF687	DNMT1(1786), USP7(7874)	HeLa S3	Nuclear Extract	WT	none	2007-10-16
180	BL2734	SRA1		HeLa S3	Nuclear Extract	WT	none	2007-10-16
181	BL2735	SRA1	CIC(23152)	HeLa S3	Nuclear Extract	WT	none	2007-10-16
182	BL1040	QKI	MKL2(57496)	HeLa S3	Nuclear Extract	WT	none	2007-10-16
183	BL1041	QKI	MED17(9440)	HeLa S3	Nuclear Extract	WT	none	2007-10-16
184	SC-8002	ESR1	DAZAP1(26528), DDX5(1655)	293T	WCE	OX-WT-ERa	vehicle	2007-10-19
185	SC-8002	ESR1	DAZAP1(26528), DDX5(1655)	293T	WCE	OX-WT-ERa	E2	2007-10-19
186	BL440	CREBBP	CSNK2A2(1459), PAWR(5074)	HeLa S3	Nuclear Extract	WT	none	2007-10-16
187	BL282	RFC4		HeLa S3	Nuclear Extract	WT	none	2007-10-23
188	BL285	RFC5		HeLa S3	Nuclear Extract	WT	none	2007-10-23
189	BL1858	TRIP6		HeLa S3	Nuclear Extract	WT	none	2007-10-23
190	BL1860	TRIP6		HeLa S3	Nuclear Extract	WT	none	2007-10-23
191	CBC421	C14orf43		HeLa S3	Nuclear Extract	WT	none	2007-10-23
192	BL1828	RCN1		HeLa S3	Nuclear Extract	WT	none	2007-10-23
193	SRC3_Wu	NCOA3		HeLa S3	Nuclear Extract	WT	none	2007-10-15
194	SRC3_Wu	NCOA3		HeLa S3	Cytosolic	WT	none	2007-10-15
199	BL695	CC2D1A		HeLa	Cytosolic	WT	Forskolin	2007-08-08
200	BL695	CC2D1A		HeLa	Nuclear Pellet	WT	Forskolin	2007-08-08
206	BL2378	RFWD3	LUZP1(7798), SPAG9(9043), TBC1D5(9779)	HeLa	Nuclear Extract	WT	none	2007-06-28
207	BL2378	RFWD3	LUZP1(7798), SPAG9(9043), TBC1D5(9779)	HeLa	Nuclear Extract	WT	HU	2007-06-28
208	BL2378	RFWD3	LUZP1(7798), SPAG9(9043), TBC1D5(9779)	HeLa	Nuclear Extract	WT	IR	2007-06-28
213	BL596	APTX	AGAP3(116988), LIG3(3980)	not known	not known	WT	NOCO	01/01/0001
214	BL596	APTX	AGAP3(116988), LIG3(3980)	not known	not known	WT	NOCO, MG132	01/01/0001
216	AB80	BRCA1	ANAPC1(64682)	MCF7	Nuclear Extract	WT	none	2007-04-15
217	AB81	BRCA1	RFX5(5993)	MCF7	Nuclear Extract	WT	none	2007-04-15
218	a-PTEN (WG)	PTEN		HeLa	Cytosolic	WT	none	2007-09-01
219	a-PTEN (WG)	PTEN		HeLa	Plasma Membrane	WT	none	2007-09-01
220	a-PTEN (WG)	PTEN		HeLa	Cytosolic	WT	none	2007-10-01
221	a-AKT (BS)	AKT1		HeLa	WCE	WT	none	2007-05-01
222	a-AKT (BS)	AKT1		HeLa	Cytosolic	WT	none	2007-05-01
225	a-Mip1		CNOT1(23019), MAPKAP1(79109), SORBS3(10174)	HeLa	Cytosolic	WT	none	2007-05-01
244	BL1826	TAOK3	KIAA1967(57805)	HeLa S3	Nuclear Extract	WT	none	2006-01-01
245	BL1826	TAOK3	KIAA1967(57805)	HeLa S3	Nuclear Extract	WT	HU	2006-01-01
246	BL1826	TAOK3	KIAA1967(57805)	HeLa S3	Nuclear Extract	WT	IR	2006-01-01
247	SC-372	RELA		HeLa S3	Cytosolic	WT	none	2007-10-30
249	BL461	RBM14		HeLa S3	Nuclear Extract	WT	none	2007-11-06
250	CBC611	RNF20	MSL1(339287), RPRD1B(58490), STRN(6801), ZFC3H1(196441)	HeLa S3	Nuclear Extract	WT	none	2007-11-06
251	SC-11421	HDAC7		HeLa S3	Nuclear Extract	WT	none	2007-10-23
252	SC-11421	HDAC7		HeLa S3	Cytosolic	WT	none	2007-10-23
259	BL439	NCOA3		HeLa S3	Nuclear Extract	WT	none	2007-08-01
260	BL439	NCOA3		HeLa S3	Cytosolic	WT	none	2007-08-01
263	SC-8002	ESR1	DAZAP1(26528), DDX5(1655)	293T	WCE	OX-WT-ERa	vehicle	2007-11-15
264	SC-8002	ESR1	DAZAP1(26528), DDX5(1655)	293T	WCE	OX-WT-ERa	E2	2007-11-15
265	SC-8002	ESR1	DAZAP1(26528), DDX5(1655)	293T	WCE	OX-WT-ERa	4HT	2007-11-15
268	BL436	NCOA2	GAPVD1(26130), SMARCC2(6601), SPAG9(9043), USO1(8615)	HeLa	Nuclear Extract	WT	none	2007-08-01
269	BL436	NCOA2	GAPVD1(26130), SMARCC2(6601), SPAG9(9043), USO1(8615)	HeLa	Nuclear Extract	WT	LPS	2007-08-01
275	a-Mip1		CNOT1(23019), MAPKAP1(79109), SORBS3(10174)	HeLa	Cytosolic	WT	none	2007-05-02
276	BL1576	ESCO1	ZMYND8(23613)	HeLa S3	Nuclear Extract	WT	none	2006-11-01
277	BL2178	RICTOR	EML3(256364)	HeLa S3	Nuclear Extract	WT	none	2007-08-01
278	BL2178	RICTOR	EML3(256364)	HeLa S3	Cytosolic	WT	none	2007-08-01
279	BL2581	RPTOR		HeLa S3	Nuclear Extract	WT	none	2007-08-01
280	BL2581	RPTOR		HeLa S3	Cytosolic	WT	none	2007-08-01
281	BL373	TOPBP1	SFPQ(6421)	HeLa S3	Nuclear Extract	WT	none	2007-01-01
282	BL373	TOPBP1	SFPQ(6421)	HeLa S3	Nuclear Extract	WT	HU	2007-01-01
283	BL373	TOPBP1	SFPQ(6421)	HeLa S3	Nuclear Extract	WT	IR	2007-01-01
286	a-PARC	CUL9		HeLa S3	Cytosolic	WT	none	2007-08-01
287	a-NEK7	NEK7	NEK9(91754)	HeLa S3	Cytosolic	WT	none	2007-11-11
289	BL3600	TP53BP2	TRIM33(51592)	HeLa S3	Nuclear Extract	WT	none	2007-04-13
290	BL3600	TP53BP2	TRIM33(51592)	HeLa S3	Cytosolic	WT	none	2007-12-02
293	a-CLSPN	CLSPN	G3BP1(10146), SFPQ(6421), SMC1A(8243)	HeLa S3	Nuclear Extract	WT	none	2007-10-07
294	a-CLSPN	CLSPN	G3BP1(10146), SFPQ(6421), SMC1A(8243)	HeLa S3	Nuclear Extract	WT	HU	2008-02-01
304	BL892	BLM		HeLa S3	Nuclear Extract	WT	NOCO	2007-11-11
310	SC-126	TP53	ENPP1(5167), OFD1(8481), RASAL2(9462), ZFYVE16(9765)	293T	WCE	WT-Control	none	2007-11-16
312	SC-126	TP53	ENPP1(5167), OFD1(8481), RASAL2(9462), ZFYVE16(9765)	HCT116	Nuclear Extract	WT	IR	2007-11-23
316	BL275	RFC2		HeLa S3	Nuclear Extract	WT	none	2007-10-16
320	SC-8396	CCND1		HEK293	WCE	WT-Control	MG132	2007-12-01
322	SC-8002	ESR1	DAZAP1(26528), DDX5(1655)	HeLa S3	Nuclear Extract	WT	none	2007-11-06
323	BL2785	PSMC5		HeLa S3	Nuclear Extract	WT	none	2007-11-06
324	BL2839	UIMC1	ACOT7(11332)	HeLa S3	Nuclear Extract	WT	none	2007-11-06
326	a-ARP5	ACTR5		HeLa S3	Nuclear Extract	WT	none	2007-12-04
327	a-HAUSP	USP7	SCML2(10389)	HeLa S3	Nuclear Extract	WT	none	2007-12-04
328	BL698	DIDO1		HeLa S3	Nuclear Extract	WT	none	2007-12-04
329	BL699	DIDO1	CSE1L(1434), HIP1R(9026), REPS1(85021)	HeLa S3	Nuclear Extract	WT	none	2007-12-04
331	BL274	RFC1		HeLa S3	Nuclear Extract	WT	none	2007-12-04
332	BL2377	RFWD3		HeLa S3	Nuclear Extract	WT	none	2007-12-04
333	BL2378	RFWD3	LUZP1(7798), SPAG9(9043), TBC1D5(9779)	HeLa S3	Nuclear Extract	WT	none	2007-12-04
334	SC-126	TP53	ENPP1(5167), OFD1(8481), RASAL2(9462), ZFYVE16(9765)	HCT116	Nuclear Extract	WT	IR	2007-12-08
335	BL2378	RFWD3	LUZP1(7798), SPAG9(9043), TBC1D5(9779)	HCT117	Nuclear Extract	WT	IR	2007-12-08
340	a-HAUSP	USP7	SCML2(10389)	HeLa S3	Nuclear Extract	WT	none	2007-12-11
341	a-HAUSP	USP7	SCML2(10389)	HeLa S3	Nuclear Extract	WT	IR	2007-12-11
349	CBC2152	RFWD3	HNRNPC(3183), HNRNPU(3192), YBX1(4904)	HeLa S3	Nuclear Extract	WT	none	2008-01-25
350	BL2378	RFWD3	LUZP1(7798), SPAG9(9043), TBC1D5(9779)	HeLa S3	Nuclear Extract	WT	none	2008-01-25
351	ab_M_YW	RFWD3	RTF1(23168)	HeLa S3	Nuclear Extract	WT	none	2008-01-27
352	ab_N_YW	RFWD3		HeLa S3	Nuclear Extract	WT	none	2008-01-27
354	BL1576	ESCO1	ZMYND8(23613)	HeLa S3	Nuclear Extract	WT	IR	2008-01-24
355	a-HAUSP	USP7	SCML2(10389)	HeLa S3	Nuclear Extract	WT	none	2008-01-24
356	a-HAUSP	USP7	SCML2(10389)	HeLa S3	Nuclear Extract	WT	IR	2008-01-24
357	BL2839	UIMC1	ACOT7(11332)	HeLa S3	Nuclear Extract	WT	none	2008-01-24
358	BL2839	UIMC1	ACOT7(11332)	HeLa S3	Nuclear Extract	WT	IR	2008-01-24
359	a-USP9X	USP9X		MCF7	WCE	WT	vehicle	2008-01-24
360	a-USP9X	USP9X		MCF7	WCE	WT	E2	2008-01-24
361	CBC1841	DEAF1	SEPT9(10801), USO1(8615)	HeLa S3	Nuclear Extract	WT	none	2008-01-30
362	CBC1842	DEAF1	STRN(6801)	HeLa S3	Nuclear Extract	WT	none	2008-01-30
363	CBC591	KLHL13	CALML5(51806), KIF4A(24137)	HeLa S3	Nuclear Extract	WT	none	2008-01-30
364	CBC592	KLHL13	KIF11(3832)	HeLa S3	Nuclear Extract	WT	none	2008-01-30
365	BL2737	ZNF335	PACSIN2(11252), TPR(7175)	HeLa S3	Nuclear Extract	WT	none	2008-01-30
366	BL2739	ZNF335	HMBOX1(79618)	HeLa S3	Nuclear Extract	WT	none	2008-01-30
367	CBC2031	ZMYND8	TBC1D5(9779)	HeLa S3	Nuclear Extract	WT	none	2008-01-30
368	CBC2032	ZMYND8		HeLa S3	Nuclear Extract	WT	none	2008-01-30
374	SC-126	TP53	ENPP1(5167), OFD1(8481), RASAL2(9462), ZFYVE16(9765)	HCT116	Nuclear Pellet	WT	IR	2008-01-27
375	SC-126	TP53	ENPP1(5167), OFD1(8481), RASAL2(9462), ZFYVE16(9765)	HCT116	Nuclear Pellet	KO-p53	IR	2008-02-01
376	CBC2152	RFWD3	HNRNPC(3183), HNRNPU(3192), YBX1(4904)	HeLa S3	Nuclear Extract	WT	IR	2008-02-14
384	a-ATR (YW)	ATR	PIBF1(10464), TPR(7175), VASP(7408)	HeLa S3	Nuclear Extract	WT	IR	2008-02-20
385	CBC2152	RFWD3	HNRNPC(3183), HNRNPU(3192), YBX1(4904)	HeLa S3	Nuclear Extract	WT	none	2008-02-20
386	CBC2132	ZNF295	CAPRIN1(4076), KCTD9(54793), SMARCC2(6601)	HeLa S3	Nuclear Extract	WT	none	2008-02-18
395	BL1856	RBM14		HeLa S3	Nuclear Extract	WT	none	2007-04-23
396	SC-126	TP53	ENPP1(5167), OFD1(8481), RASAL2(9462), ZFYVE16(9765)	HCT116	Nuclear Pellet	WT	CPT	2008-03-01
397	SC-126	TP53	ENPP1(5167), OFD1(8481), RASAL2(9462), ZFYVE16(9765)	HCT116	Nuclear Pellet	KO-p53	CPT	2008-03-01
398	BL439	NCOA3		HeLa S3	Cytosolic	WT	HU	2008-02-20
399	BL438	NCOA3		HeLa S3	Cytosolic	WT	HU	2008-02-20
403	BL439	NCOA3		MCF7	Cytosolic	WT	E2	2008-03-10
404	BL2840	UIMC1		HeLa S3	Nuclear Extract	WT	none	2008-02-25
405	BL2243	NUP214	MGEA5(10724)	HeLa S3	Nuclear Extract	WT	none	2008-02-25
408	SC-126	TP53	ENPP1(5167), OFD1(8481), RASAL2(9462), ZFYVE16(9765)	HCT116	Nuclear Extract	WT	CPT	2008-03-01
411	CBC42	NAT10		HeLa S3	Nuclear Extract	WT	none	2008-05-06
422	SC-126	TP53	ENPP1(5167), OFD1(8481), RASAL2(9462), ZFYVE16(9765)	HCT116	Nuclear Extract	WT	CPT	2008-04-01
423	SC-126	TP53	ENPP1(5167), OFD1(8481), RASAL2(9462), ZFYVE16(9765)	HCT116	Nuclear Pellet	WT	CPT	2008-04-01
424	SC-126	TP53	ENPP1(5167), OFD1(8481), RASAL2(9462), ZFYVE16(9765)	HCT116	Nuclear Extract	WT	IR	2008-03-31
425	SC-126	TP53	ENPP1(5167), OFD1(8481), RASAL2(9462), ZFYVE16(9765)	HCT116	Nuclear Extract	WT	none	2008-03-31
433	SC-126	TP53	ENPP1(5167), OFD1(8481), RASAL2(9462), ZFYVE16(9765)	HCT116	WCE	WT	none	2008-04-02
434	SC-126	TP53	ENPP1(5167), OFD1(8481), RASAL2(9462), ZFYVE16(9765)	HCT116	WCE	WT	IR	2008-04-02
441	BL439	NCOA3		MCF7	Nuclear Extract	WT	P4	2008-04-08
458	BL996	INTS1		HeLa S3	Nuclear Extract	WT	none	2008-05-15
459	BL1014	INTS3		HeLa S3	Nuclear Extract	WT	none	2008-05-15
460	BL1016	INTS6	PYGL(5836)	HeLa S3	Nuclear Extract	WT	none	2008-05-15
461	BL1019	INTS5	AFAP1(60312)	HeLa S3	Nuclear Extract	WT	none	2008-05-15
462	BL1026	INTS7	BTBD12(84464), MAD1L1(8379)	HeLa S3	Nuclear Extract	WT	none	2008-05-15
463	BL1028	INTS9	ISYNA1(51477)	HeLa S3	Nuclear Extract	WT	none	2008-05-15
465	a-REST (TW)	REST	MORC3(23515)	HeLa S3	Nuclear Extract	WT	none	2008-05-15
466	BL1739	CARM1		HeLa	Nuclear Extract	WT	none	2008-05-16
467	BL1739	CARM1		HeLa	Cytosolic	WT	none	2008-05-16
490	BL308	SMC1A		HeLa S3	Nuclear Extract	WT	none	2008-05-21
491	BL313	SMC3		HeLa S3	Nuclear Extract	WT	none	2008-05-21
492	BL391	RAD21		HeLa S3	Nuclear Extract	WT	none	2008-05-21
493	BL-PDS5B	PDS5B	G3BP1(10146), INTS3(65123)	HeLa S3	Nuclear Extract	WT	none	2008-05-21
495	BL443	EP300	MDC1(9656), NEDD1(121441), TUBGCP3(10426)	HeLa S3	Nuclear Extract	WT	none	2008-05-21
517	BL4102	PRMT6	ATR(545), MORC2(22880)	HeLa S3	Nuclear Extract	WT	none	2008-06-16
518	BL1327	FOXO3	ZMYND8(23613)	HeLa S3	Nuclear Extract	WT	none	2008-06-16
519	BL1426	FOXO1	GUSB(2990), NAB1(4664), SASS6(163786)	HeLa S3	Nuclear Extract	WT	none	2008-06-16
520	BL4952	HMGN3		HeLa S3	Nuclear Extract	WT	none	2008-06-16
521	BL825	HLTF	YEATS2(55689)	HeLa S3	Nuclear Extract	WT	none	2008-06-16
522	BL4957	ZNHIT3	GOLGA3(2802), MAP3K4(4216), RILPL1(353116)	HeLa S3	Nuclear Extract	WT	none	2008-06-16
526	BL3509	KDM4A	GARS(2617)	HeLa S3	Nuclear Extract	WT	none	2008-06-23
527	BL677	LEO1	RANBP2(5903)	HeLa S3	Nuclear Extract	WT	none	2008-06-23
528	BL1408	MLL	EDC4(23644)	HeLa S3	Nuclear Extract	WT	none	2008-06-23
529	BL2118	MYST1	KIAA1267(284058)	HeLa S3	Nuclear Extract	WT	none	2008-06-23
530	BL674	PAF1		HeLa S3	Nuclear Extract	WT	none	2008-06-23
531	BL3688	PRMT5	DNM2(1785)	HeLa S3	Nuclear Extract	WT	none	2008-06-23
532	SC-6243	TP53	SUPV3L1(6832)	MDA-231	Nuclear Extract	WT (mutant p53)	none	2008-06-25
534	SC-126	TP53	ENPP1(5167), OFD1(8481), RASAL2(9462), ZFYVE16(9765)	MDA-231	Nuclear Extract	WT (mutant p53)	none	2008-06-25
538	BL4543	ARID1B	KIAA1967(57805)	HeLa S3	Nuclear Extract	WT	none	2008-06-27
539	BL1285	ASH2L	ANAPC7(51434)	HeLa S3	Nuclear Extract	WT	none	2008-06-27
540	BL2500	DOT1L	ZMYND8(23613)	HeLa S3	Nuclear Extract	WT	none	2008-06-27
541	BL1232	BRD8		HeLa S3	Nuclear Extract	WT	none	2008-06-27
546	BL5032	CHD7		HeLa S3	Nuclear Extract	WT	none	2008-07-02
547	BL5039	CHD9	KCTD9(54793), TP53BP1(7158)	HeLa S3	Nuclear Extract	WT	none	2008-07-02
548	BL4945	TRIP10	KCTD15(79047)	HeLa S3	Nuclear Extract	WT	none	2008-07-02
549	BL4214	THRAP3		HeLa S3	Nuclear Extract	WT	none	2008-07-02
550	BL2805	UBR5		HeLa S3	Nuclear Extract	WT	none	2008-07-02
551	BL3821	KDM3B	CDAN1(146059)	HeLa S3	Nuclear Extract	WT	none	2008-07-02
552	BL3837	KDM5A		HeLa S3	Nuclear Extract	WT	none	2008-07-02
553	BL1193	SETD1A	KCNAB2(8514), NUP214(8021)	HeLa S3	Nuclear Extract	WT	none	2008-07-02
568	CBC2152	RFWD3	HNRNPC(3183), HNRNPU(3192), YBX1(4904)	HCT116	Nuclear Extract	WT	HU	2008-07-11
569	CBC2152	RFWD3	HNRNPC(3183), HNRNPU(3192), YBX1(4904)	HCT116	Nuclear Pellet	WT	HU	2008-07-11
570	CBC2152	RFWD3	HNRNPC(3183), HNRNPU(3192), YBX1(4904)	HCT116	Nuclear Extract	WT	none	2008-07-11
575	SC-6243	TP53	SUPV3L1(6832)	T47D	Nuclear Extract	WT, p53 mutant	none	2008-07-14
576	SC-6243	TP53	SUPV3L1(6832)	T47D	Cytosolic	WT, p53 mutant	none	2008-07-14
577	SC-6243	TP53	SUPV3L1(6832)	T47D	Nuclear Pellet	WT, p53 mutant	none	2008-07-14
591	SC-8051	JUNB		HeLa S3	Nuclear Extract	WT	none	2008-07-17
592	SC-28673	ATF1		HeLa S3	Nuclear Extract	WT	none	2008-07-17
593	SC-6233	ATF2		HeLa S3	Nuclear Extract	WT	none	2008-07-17
594	SC-8405	NFATC3	PUM1(9698)	HeLa S3	Nuclear Extract	WT	none	2008-07-17
595	SC-197	MAX	MDC1(9656), RANBP2(5903)	HeLa S3	Nuclear Extract	WT	none	2008-07-17
596	SC-9087	NR2C1	C5orf33(133686)	HeLa S3	Nuclear Extract	WT	none	2008-07-17
597	SC-9086	NR2C2		HeLa S3	Nuclear Extract	WT	none	2008-07-17
598	SC-232	POU2F1	POU2F3(25833), SIN3A(25942), TBC1D15(64786), ZNF295(49854)	HeLa S3	Nuclear Extract	WT	none	2008-07-17
599	BL2986	RBBP4	SUPT5H(6829)	HeLa S3	Nuclear Extract	WT	none	2008-07-17
600	BL2989	RBBP7		HeLa S3	Nuclear Extract	WT	none	2008-07-17
601	BL3314	RNF40		HeLa S3	Nuclear Extract	WT	none	2008-07-17
602	BL540	SETDB1		HeLa S3	Nuclear Extract	WT	none	2008-07-17
603	BL1732	SPEN	VASP(7408)	HeLa S3	Nuclear Extract	WT	none	2008-07-17
604	BL4953	TRIP11		HeLa S3	Nuclear Extract	WT	none	2008-07-17
605	BL4808	TRRAP	TANC1(85461)	HeLa S3	Nuclear Extract	WT	none	2008-07-17
606	BL2687	ZBTB7A		HeLa S3	Nuclear Extract	WT	none	2008-07-17
607	a-FTO (78)	FTO	EEF1D(1936), KIF20B(9585), NPTX1(4884)	HeLa	Cytosolic	WT	none	2008-07-24
608	a-FTO (78)	FTO	EEF1D(1936), KIF20B(9585), NPTX1(4884)	HeLa	Nuclear Extract	WT	none	2008-07-24
609	a-FTO (78)	FTO	EEF1D(1936), KIF20B(9585), NPTX1(4884)	HepG2	Cytosolic	WT-parental	none	2008-07-24
610	a-FTO (78)	FTO	EEF1D(1936), KIF20B(9585), NPTX1(4884)	HepG2	Nuclear Extract	WT-parental	none	2008-07-24
612	a-REST (TW)	REST	MORC3(23515)	HMEC-JZ-F7	Nuclear Extract	WT	none	2008-07-24
618	BL4015	PPP1R13B	SATB1(6304)	MCF7	Nuclear Extract	WT	P4	2008-07-25
619	BL4015	PPP1R13B	SATB1(6304)	293T-FRT	Nuclear Extract	ST-WT-SRC3	none	2008-07-25
629	BL5990	ZNF592		HeLa S3	Nuclear Extract	WT	none	2008-07-29
630	BL671	HUWE1		HeLa S3	Nuclear Extract	WT	none	2008-07-29
631	BL2213	LATS2	ANAPC7(51434), HMBOX1(79618), SHMT1(6470)	HeLa S3	Nuclear Extract	WT	none	2008-07-29
632	BL2275	MKRN1	C3orf75(54859), CPSF6(11052), NUDT21(11051)	HeLa S3	Nuclear Extract	WT	none	2008-07-29
633	BL2463	TGS1		HeLa S3	Nuclear Extract	WT	none	2008-07-29
634	BL3066	PPM1D	GRIPAP1(56850), HMG20B(10362)	HeLa S3	Nuclear Extract	WT	none	2008-07-29
635	BL2989	RBBP7		HeLa S3	Nuclear Extract	WT	none	2008-07-29
636	BL2204	STK3	AKAP6(9472), KIF11(3832), ROCK2(9475), STK4(6789)	HeLa S3	Nuclear Extract	WT	none	2008-07-29
641	SC-6243	TP53	SUPV3L1(6832)	T47D	Nuclear Extract	WT (p53 mutant)	none	2008-08-08
642	SC-6243	TP53	SUPV3L1(6832)	T47D	Nuclear Pellet	WT (p53 mutant)	none	2008-08-08
643	SC-6243	TP53	SUPV3L1(6832)	MDB-468	Nuclear Extract	WT (p53 mutant)	none	2008-08-08
644	SC-6243	TP53	SUPV3L1(6832)	MDB-468	Cytosolic	WT (p53 mutant)	none	2008-08-08
646	BL441	CREBBP		HeLa S3	Nuclear Extract	WT	none	2008-08-08
647	BL2462	DDX5		HeLa S3	Nuclear Extract	WT	none	2008-08-08
648	BL2221	COL4A3BP		HeLa S3	Nuclear Extract	WT	none	2008-08-08
649	BL2854	MED18	ACACA(31), IPO7(10527)	HeLa S3	Nuclear Extract	WT	none	2008-08-08
650	BL2603	MED24	AGAP2(116986), DPH5(51611)	HeLa S3	Nuclear Extract	WT	none	2008-08-08
651	BL2434	UBA3	ADNP(23394), SHMT1(6470)	HeLa S3	Nuclear Extract	WT	none	2008-08-08
652	BL2458	UBE2L3	KCTD15(79047)	HeLa S3	Nuclear Extract	WT	none	2008-08-08
653	BL2158	USP34	NF1(4763)	HeLa S3	Nuclear Extract	WT	none	2008-08-08
654	BL2196	USP4	USP15(9958)	HeLa S3	Nuclear Extract	WT	none	2008-07-29
655	BL664	RFC3	ZMYM2(7750)	HeLa S3	Nuclear Extract	WT	none	2008-07-29
656	BL553	TRIM28		HeLa S3	Nuclear Extract	WT	none	2008-07-29
658	BL1355	FUS		HeLa S3	Nuclear Extract	WT	none	2008-07-29
659	BL1688	MAD1L1	STAT3(6774)	HeLa S3	Nuclear Extract	WT	none	2008-07-29
660	BL1544	TTK	DMTF1(9988)	HeLa S3	Nuclear Extract	WT	none	2008-07-29
661	BL1462	MAD2L1	MAD1L1(8379)	HeLa S3	Nuclear Extract	WT	none	2008-07-29
663	BL4015	PPP1R13B	SATB1(6304)	HeLa S3	Cytosolic	WT	none	2008-08-07
664	BL3602	TP53BP2		HeLa S3	Cytosolic	WT	none	2008-08-07
672	BL435	NCOA1	CAD(790), TP53BP1(7158), TPD52L2(7165), WDHD1(11169)	MCF7	Nuclear Extract	WT	E2	2008-08-20
673	BL435	NCOA1	CAD(790), TP53BP1(7158), TPD52L2(7165), WDHD1(11169)	MCF7	Cytosolic	WT	E2	2008-08-20
674	BL4015	PPP1R13B	SATB1(6304)	MCF7	Nuclear Extract	WT	none	2008-08-20
675	BL4015	PPP1R13B	SATB1(6304)	MCF7	Cytosolic	WT	none	2008-08-20
676	a-FTO (78)	FTO	EEF1D(1936), KIF20B(9585), NPTX1(4884)	HeLa S3	Cytosolic	WT	none	2008-08-23
677	a-FTO (78)	FTO	EEF1D(1936), KIF20B(9585), NPTX1(4884)	HeLa S3	Nuclear Extract	WT	none	2008-08-23
682	ABM-2052 (6H2.1)	PTEN		HeLa S3	Nuclear Extract	WT	IR	2008-09-04
683	ABM-2052 (6H2.1)	PTEN		HeLa S3	Nuclear Extract	WT	none	2008-09-04
684	BL996	INTS1		HeLa S3	Nuclear Extract	WT	IR	2008-09-04
685	BL1014	INTS3		HeLa S3	Nuclear Extract	WT	IR	2008-09-04
686	BL1016	INTS6	PYGL(5836)	HeLa S3	Nuclear Extract	WT	IR	2008-09-04
687	BL1019	INTS5	AFAP1(60312)	HeLa S3	Nuclear Extract	WT	IR	2008-09-04
688	SC-6243	TP53	SUPV3L1(6832)	MDA468	Nuclear Extract	p53 mutant	none	2008-09-10
689	SC-6243	TP53	SUPV3L1(6832)	MDA231	Nuclear Extract	p53 mutant	none	2008-09-10
690	SC-6243	TP53	SUPV3L1(6832)	MDA231	Cytosolic	p53 mutant	none	2008-09-10
691	SC-6243	TP53	SUPV3L1(6832)	T47D	Nuclear Extract	p53 mutant	none	2008-09-10
692	SC-6243	TP53	SUPV3L1(6832)	T47D	Cytosolic	p53 mutant	none	2008-09-10
705	BL2255	PRKRIR	OSBPL9(114883), TACC3(10460)	HeLa S3	Nuclear Extract	WT	none	2008-09-18
706	BL2262	DOCK9	RABEPK(10244)	HeLa S3	Nuclear Extract	WT	none	2008-09-18
707	BL2263	DOCK9	NUMA1(4926)	HeLa S3	Nuclear Extract	WT	none	2008-09-18
708	BL2270	TCF12	EDC4(23644), NUP155(9631)	HeLa S3	Nuclear Extract	WT	none	2008-09-18
709	BL2271	TCF12	EML4(27436), HMBOX1(79618), RBM14(10432)	HeLa S3	Nuclear Extract	WT	none	2008-09-18
710	BL2287	ZC3H13	DLAT(1737), MED1(5469), MED12(9968)	HeLa S3	Nuclear Extract	WT	none	2008-09-18
711	BL2446	SAFB		HeLa S3	Nuclear Extract	WT	none	2008-09-18
712	BL2222	COL4A3BP	CPSF6(11052)	HeLa S3	Nuclear Extract	WT	none	2008-09-19
713	BL2225	MAPK14	C9orf78(51759)	HeLa S3	Nuclear Extract	WT	none	2008-09-19
714	BL2226	MAPK14	ARHGEF12(23365), DLAT(1737), PDHB(5162)	HeLa S3	Nuclear Extract	WT	none	2008-09-19
715	BL2444	RPL7		HeLa S3	Nuclear Extract	WT	none	2008-09-19
716	BL2455	CALCOCO1		HeLa S3	Nuclear Extract	WT	none	2008-09-19
718	BL2794	TRIM24	KCTD15(79047), TRIM28(10155)	HeLa S3	Nuclear Extract	WT	none	2008-09-19
719	BL2795	TRIM24	POLDIP3(84271)	HeLa S3	Nuclear Extract	WT	none	2008-09-19
720	BL586	FEN1		HeLa S3	Nuclear Extract	WT	none	2008-09-23
721	BL1352	FUS		HeLa S3	Nuclear Extract	WT	none	2008-09-23
722	BL2293	EDC4	DNM2(1785)	HeLa S3	Nuclear Extract	WT	none	2008-09-23
723	BL2294	EDC4		HeLa S3	Nuclear Extract	WT	none	2008-09-23
724	BL2366	KIAA0528	APPL2(55198), SMC1A(8243), SMC3(9126), TRPS1(7227)	HeLa S3	Nuclear Extract	WT	none	2008-09-23
725	BL2367	KIAA0528	INPPL1(3636), PACS1(55690)	HeLa S3	Nuclear Extract	WT	none	2008-09-23
735	BL1327	FOXO3	ZMYND8(23613)	HeLa S3	Nuclear Extract	WT	none	2008-10-02
736	BL2194	USP4	CYFIP1(23191), EML1(2009), RAD50(10111)	HeLa S3	Nuclear Extract	WT	none	2008-10-02
737	BL2094	MSH2	CAD(790)	HeLa S3	Nuclear Extract	WT	none	2008-10-02
738	CBC621	ZNF687	G3BP1(10146), LRRFIP2(9209)	HeLa S3	Nuclear Extract	WT	none	2008-10-02
739	CBC622	ZNF687	DNMT1(1786), USP7(7874)	HeLa S3	Nuclear Extract	WT	none	2008-10-02
740	CBC2031	ZMYND8	TBC1D5(9779)	HeLa S3	Nuclear Extract	WT	none	2008-10-02
741	CBC2032	ZMYND8		HeLa S3	Nuclear Extract	WT	none	2008-10-02
742	BL5990	ZNF592		HeLa S3	Nuclear Extract	WT	none	2008-10-02
749	BL4396	ARFGEF1		HeLa S3	Cytosolic	WT	none	2008-10-01
750	BL2194	USP4	CYFIP1(23191), EML1(2009), RAD50(10111)	HeLa S3	Cytosolic	WT	none	2008-10-01
751	BL4805	UBE4B	KIAA1219(57148)	HeLa S3	Cytosolic	WT	none	2008-10-02
752	BL2158	USP34	NF1(4763)	HeLa S3	Cytosolic	WT	none	2008-10-02
754	BL840	UBE2A	UBXN1(51035)	HeLa S3	Cytosolic	WT	none	2008-10-02
755	BL2458	UBE2L3	KCTD15(79047)	HeLa S3	Cytosolic	WT	none	2008-10-02
757	BL533	CCAR1	USO1(8615)	HeLa S3	Nuclear Extract	WT	none	2008-10-07
758	BL1258	MDM4	KIAA1429(25962), WTAP(9589), ZC3H13(23091)	HeLa S3	Nuclear Extract	WT	none	2008-10-07
759	BL1582	E4F1	CCDC91(55297), QRICH1(54870)	HeLa S3	Nuclear Extract	WT	none	2008-10-07
760	BL2030	RFWD2	DSP(1832), RUVBL2(10856)	HeLa S3	Nuclear Extract	WT	none	2008-10-07
761	BL2507	TLK1	ETF1(2107)	HeLa S3	Nuclear Extract	WT	none	2008-10-07
762	BL2512	TLK2		HeLa S3	Nuclear Extract	WT	none	2008-10-07
763	BL3622	DTX3L	C12orf10(60314)	HeLa S3	Nuclear Extract	WT	none	2008-10-07
764	BL6494	ESCO2	IMPDH2(3615), TRRAP(8295)	HeLa S3	Nuclear Extract	WT	none	2008-10-07
766	BL4782	AKT1S1		HeLa S3	Nuclear Extract	WT	none	2008-09-29
768	BL2225	MAPK14	C9orf78(51759)	HeLa S3	Cytosolic	WT	none	2008-09-30
769	BL2226	MAPK14	ARHGEF12(23365), DLAT(1737), PDHB(5162)	HeLa S3	Cytosolic	WT	none	2008-09-30
770	BL2254	PRKRIR		HeLa S3	Cytosolic	WT	none	2008-10-01
771	BL2255	PRKRIR	OSBPL9(114883), TACC3(10460)	HeLa S3	Cytosolic	WT	none	2008-10-01
772	BL2382	TAOK1	VAT1(10493)	HeLa S3	Cytosolic	WT	none	2008-09-30
773	BL2789	PTEN		HeLa S3	Cytosolic	WT	none	2008-09-30
774	BL2790	PTEN	NES(10763), RBM12(10137), RNF20(56254)	HeLa S3	Cytosolic	WT	none	2008-10-01
775	BL2212	LATS1		HeLa S3	Nuclear Extract	WT	none	2008-10-05
777	BL6096	MOV10		HeLa S3	Nuclear Extract	WT	none	2008-10-05
778	BL1657	SMG1	TBL3(10607), TFAP4(7023), TNKS1BP1(85456)	HeLa S3	Nuclear Extract	WT	none	2008-10-05
779	BL1936	SMG5		HeLa S3	Nuclear Extract	WT	none	2008-10-05
780	BL1601	TSC1		HeLa S3	Nuclear Extract	WT	none	2008-10-05
781	BL2185	TSC2		HeLa S3	Nuclear Extract	WT	none	2008-10-05
782	BL5941	WNK1	PBRM1(55193)	HeLa S3	Nuclear Extract	WT	none	2008-10-05
784	BL551	SMC2		HeLa S3	Nuclear Extract	WT	none	2008-10-01
785	BL561	COPS2		HeLa S3	Nuclear Extract	WT	none	2008-10-01
786	BL1476	PNKP	CCDC6(8030), SHKBP1(92799)	HeLa S3	Nuclear Extract	WT	none	2008-10-01
787	BL1684	BUB3	DMXL1(1657), OSBPL3(26031), TTLL4(9654)	HeLa S3	Nuclear Extract	WT	none	2008-10-01
788	BL1707	PHB2		HeLa S3	Nuclear Extract	WT	none	2008-10-01
789	BL1732	SPEN	VASP(7408)	HeLa S3	Nuclear Extract	WT	none	2008-10-01
790	BL1738	CARM1		HeLa S3	Nuclear Extract	WT	none	2008-10-01
791	BL1754	MED23	BRD4(23476), BUB1B(701), CRYZ(1429), GIT1(28964)	HeLa S3	Nuclear Extract	WT	none	2008-10-01
792	BL1966	RANBP1	SNHG3-RCC1(751867)	HeLa S3	Cytosolic	WT	none	2008-10-10
794	BL239	RAD17		HeLa S3	Nuclear Extract	WT	none	2008-10-10
795	BL531	MCM10		HeLa S3	Nuclear Extract	WT	none	2008-10-10
796	BL840	UBE2A	UBXN1(51035)	HeLa S3	Nuclear Extract	WT	none	2008-10-10
797	BL580	MDC1		HeLa S3	Nuclear Extract	WT	none	2008-10-10
798	BL938	SP1		HeLa S3	Nuclear Extract	WT	none	2008-10-10
799	BL993	MORC2	ACLY(47)	HeLa S3	Nuclear Extract	WT	none	2008-10-10
800	BL4874	FBXO11	HCFC1(3054), SETD1A(9739)	HeLa S3	Nuclear Extract	WT	none	2008-10-10
801	BL5619	DAXX	ADD1(118), KIAA1797(54914)	HeLa S3	Nuclear Extract	WT	none	2008-10-10
804	SC-6243	TP53	SUPV3L1(6832)	HCT116	Cytosolic	p53 WT	CPT	2008-10-14
805	SC-6243	TP53	SUPV3L1(6832)	HCT116	Nuclear Extract	p53 WT	CPT	2008-10-14
806	SC-6243	TP53	SUPV3L1(6832)	MDA231	Nuclear Extract	p53 mutant	none	2008-10-14
807	SC-6243	TP53	SUPV3L1(6832)	MDA231	Cytosolic	p53 mutant	none	2008-10-14
808	SC-6243	TP53	SUPV3L1(6832)	MDA468	Nuclear Extract	p53 mutant	none	2008-10-14
809	SC-6243	TP53	SUPV3L1(6832)	MDA468	Cytosolic	p53 mutant	none	2008-10-14
814	BL235	CHEK1	CPSF1(29894), CSTF3(1479), ITPR3(3710), NFS1(9054), OPA1(4976)	HeLa S3	Nuclear Extract	WT	none	2008-10-16
815	BL294	RPRD2	WDHD1(11169)	HeLa S3	Nuclear Extract	WT	none	2008-10-16
816	BL735	TERF2IP		HeLa S3	Nuclear Extract	WT	none	2008-10-16
817	BL1601	TSC1		HeLa S3	Nuclear Extract	WT	none	2008-10-16
818	BL1657	SMG1	TBL3(10607), TFAP4(7023), TNKS1BP1(85456)	HeLa S3	Nuclear Extract	WT	none	2008-10-16
819	BL1789	PAXIP1	AKAP8L(26993), PDE3A(5139)	HeLa S3	Nuclear Extract	WT	none	2008-10-16
820	BL1921	KIAA1967	CCAR1(55749)	HeLa S3	Nuclear Extract	WT	none	2008-10-16
821	BL1936	SMG5		HeLa S3	Nuclear Extract	WT	none	2008-10-16
822	BL3131	PPP2CB	CCDC6(8030), ZBTB40(9923)	HeLa S3	Nuclear Extract	WT	none	2008-10-20
823	BL3467	SUPT6H	RNF40(9810), UIMC1(51720), ZNF609(23060)	HeLa S3	Nuclear Extract	WT	none	2008-10-20
824	BL3555	SUPT5H	EIF3B(8662)	HeLa S3	Nuclear Extract	WT	none	2008-10-20
825	BL3822	JMJD1C	SCYL1(57410)	HeLa S3	Nuclear Extract	WT	none	2008-10-20
826	BL4031	BCAS2		HeLa S3	Nuclear Extract	WT	none	2008-10-20
827	BL4209	TCEB3		HeLa S3	Nuclear Extract	WT	none	2008-10-20
828	BL4386	MAGED2	NAP1L1(4673)	HeLa S3	Nuclear Extract	WT	none	2008-10-20
829	BL4839	WDHD1		HeLa S3	Nuclear Extract	WT	none	2008-10-20
830	BL2555	UHRF1		HeLa S3	Nuclear Extract	WT	none	2008-10-23
831	BL5883	CIZ1		HeLa S3	Nuclear Extract	WT	none	2008-10-23
832	BL5906	NFRKB		HeLa S3	Nuclear Extract	WT	none	2008-10-23
833	BL5999	FOXM1	TPR(7175), TRIM33(51592), TRPS1(7227)	HeLa S3	Nuclear Extract	WT	none	2008-10-23
834	BL6198	NR2F6	PPFIA1(8500)	HeLa S3	Nuclear Extract	WT	none	2008-10-23
835	BL6318	PHF12	ARID3A(1820), NCOA3(8202)	HeLa S3	Nuclear Extract	WT	none	2008-10-23
836	BL6632	FOXK1		HeLa S3	Nuclear Extract	WT	none	2008-10-23
837	BL6636	FOXK2		HeLa S3	Nuclear Extract	WT	none	2008-10-23
843	BL1601	TSC1		HeLa	Cytosolic	WT	none	2008-11-06
844	BL2178	RICTOR	EML3(256364)	MCF7	WCE	WT	Serum stimulation	2008-10-10
845	BL2581	RPTOR		MCF7	WCE	WT	Serum stimulation	2008-10-10
848	BL1258	MDM4	KIAA1429(25962), WTAP(9589), ZC3H13(23091)	HeLa S3	Nuclear Extract	WT	none	2008-11-03
849	BL840	UBE2A	UBXN1(51035)	HeLa S3	Nuclear Extract	WT	none	2008-11-03
857	BL2434	UBA3	ADNP(23394), SHMT1(6470)	HeLa S3	Cytosolic	WT	none	2008-10-09
858	BL2390	CUL4A		HeLa S3	Cytosolic	WT	none	2008-10-09
860	BL3106	APC	FNBP1(23048)	HeLa S3	Cytosolic	WT	none	2008-10-10
861	BL409	UPF1	LCN1(3933), LTF(4057)	HeLa S3	Cytosolic	WT	none	2008-10-10
862	BL5966	RANBP3		HeLa S3	Cytosolic	WT	none	2008-10-10
863	BL2030	RFWD2	DSP(1832), RUVBL2(10856)	HeLa S3	Cytosolic	WT	none	2008-10-10
864	BL2418	UBAP2L		HeLa S3	Cytosolic	WT	none	2008-10-10
865	BL1966	RANBP1	SNHG3-RCC1(751867)	HeLa S3	Nuclear Extract	WT	none	2008-10-10
867	BL2600	BRIP1	ARHGEF18(23370), CEP170(9859), TBC1D4(9882)	HeLa S3	Nuclear Extract	WT	none	2008-11-05
868	BL4782	AKT1S1		HeLa	Cytosolic	WT	none	2008-10-30
869	BL6096	MOV10		HeLa	Nuclear Extract	WT	none	2008-10-08
870	BL2788	PTEN		HeLa	Cytosolic	WT	none	2008-10-06
872	BL2185	TSC2		HeLa	Cytosolic	WT	none	2008-10-08
873	BL1657	SMG1	TBL3(10607), TFAP4(7023), TNKS1BP1(85456)	HeLa	Cytosolic	WT	none	2008-10-08
874	BL2212	LATS1		HeLa	Cytosolic	WT	none	2008-10-08
875	BL5941	WNK1	PBRM1(55193)	HeLa	Cytosolic	WT	none	2008-10-08
876	BL703	TBK1	RIMKLB(57494)	HeLa	Cytosolic	WT	none	2008-10-29
884	BL1244	MAML3	PRPF19(27339), SMEK1(55671)	HeLa S3	Nuclear Extract	WT	none	2008-11-05
886	SC-8005	ESR1	SMARCA4(6597)	MCF7	Nuclear Extract	WT	vehicle	2008-10-29
887	SC-8005	ESR1	SMARCA4(6597)	MCF7	Nuclear Extract	WT	E2	2008-10-29
888	N2	ESCO2	MOCOS(55034), TPD52L2(7165)	HeLa S3	Nuclear Extract	WT	none	2008-10-27
889	BL2212	LATS1		HeLa S3	Nuclear Extract	WT	none	2008-10-27
890	BL2356	MLF1	TBC1D4(9882)	HeLa S3	Nuclear Extract	WT	none	2008-10-27
891	BL2600	BRIP1	ARHGEF18(23370), CEP170(9859), TBC1D4(9882)	HeLa S3	Nuclear Extract	WT	none	2008-10-27
892	BL3263	NHEJ1	COPS8(10920)	HeLa S3	Nuclear Extract	WT	none	2008-10-27
893	BL1966	RANBP1	SNHG3-RCC1(751867)	HeLa S3	Nuclear Extract	WT	none	2008-10-27
894	BL2185	TSC2		HeLa S3	Nuclear Extract	WT	none	2008-10-27
895	BL2418	UBAP2L		HeLa S3	Nuclear Extract	WT	none	2008-10-27
896	BL4488	KDM5C		HeLa S3	Nuclear Extract	WT	none	2008-11-07
897	BL5554	TWISTNB	SEPT2(4735), SEPT9(10801)	HeLa S3	Nuclear Extract	WT	none	2008-11-07
898	BL5777	WTAP		HeLa S3	Nuclear Extract	WT	none	2008-11-07
899	BL5829	PHF6	RRM2(6241)	HeLa S3	Nuclear Extract	WT	none	2008-11-07
900	BL2776	NF2	C9orf86(55684), PRDX4(10549), XRCC6(2547)	HeLa S3	Nuclear Extract	WT	none	2008-11-07
901	BL2777	NF2	DOCK7(85440), KCNC1(3746), LRCH1(23143), PFKP(5214)	HeLa S3	Nuclear Extract	WT	none	2008-11-07
902	BL4553	TRIM33		HeLa S3	Nuclear Extract	WT	none	2008-11-07
903	BL5398	FAM175B	PACS1(55690), WDHD1(11169)	HeLa S3	Nuclear Extract	WT	none	2008-11-07
905	BL3131	PPP2CB	CCDC6(8030), ZBTB40(9923)	HeLa S3	Nuclear Extract	WT	none	2008-11-05
906	BL5495	RAD18	ANKRD32(84250), SUGT1(10910), ZBTB40(9923)	HeLa S3	Nuclear Extract	WT	none	2008-11-05
907	BL3283	C7orf27	TMPO(7112)	HeLa S3	Nuclear Extract	WT	none	2008-11-05
908	BL2995	CRTC2	RFX5(5993)	HeLa S3	Nuclear Extract	WT	none	2008-11-05
909	BL1239	MAML1	ANAPC1(64682)	HeLa S3	Nuclear Extract	WT	none	2008-11-05
910	BL2777	NF2	DOCK7(85440), KCNC1(3746), LRCH1(23143), PFKP(5214)	HeLa S3	Nuclear Extract	WT	none	2008-11-04
911	BL2776	NF2	C9orf86(55684), PRDX4(10549), XRCC6(2547)	HeLa S3	Nuclear Extract	WT	none	2008-11-04
913	CBC2032	ZMYND8		MCF7	Nuclear Extract	WT	none	2008-10-29
914	BL1239	MAML1	ANAPC1(64682)	HeLa S3	Nuclear Extract	WT	none	2008-11-11
915	BL1242	MAML2	NCOA3(8202)	HeLa S3	Nuclear Extract	WT	none	2008-11-11
916	BL1244	MAML3	PRPF19(27339), SMEK1(55671)	HeLa S3	Nuclear Extract	WT	none	2008-11-11
917	BL2703	RP6-213H19.1	STRN(6801)	HeLa S3	Nuclear Extract	WT	none	2008-11-11
918	BL2995	CRTC2	RFX5(5993)	HeLa S3	Nuclear Extract	WT	none	2008-11-11
919	BL3283	C7orf27	TMPO(7112)	HeLa S3	Nuclear Extract	WT	none	2008-11-11
920	BL3434	CRTC1		HeLa S3	Nuclear Extract	WT	none	2008-11-11
921	BL3463	CASC5	MDC1(9656)	HeLa S3	Nuclear Extract	WT	none	2008-11-11
925	BL3114	PPP4R1		HeLa S3	Nuclear Extract	WT	none	2008-11-11
926	BL3118	PPP4R2	FBXO28(23219), WBP11(51729)	HeLa S3	Nuclear Extract	WT	none	2008-11-11
927	BL3121	SMEK1		HeLa S3	Nuclear Extract	WT	none	2008-11-11
928	BL3893	RAD9A		HeLa S3	Nuclear Extract	WT	none	2008-11-11
929	BL3923	PPP4C		HeLa S3	Nuclear Extract	WT	none	2008-11-11
930	BL4277	TIMELESS	ARID1A(8289), WDHD1(11169)	HeLa S3	Nuclear Extract	WT	none	2008-11-11
941	BL4805	UBE4B	KIAA1219(57148)	HeLa S3	Nuclear Extract	WT	none	2008-11-13
946	BL2502	REST	RFC2(5982)	HeLa	Nuclear Extract	WT	none	2008-11-07
955	BL5829	PHF6	RRM2(6241)	HeLa	Nuclear Extract	WT	none	2008-11-17
956	BL533	CCAR1	USO1(8615)	HeLa	Nuclear Extract	WT	none	2008-11-17
957	BL531	MCM10		HeLa	Nuclear Extract	WT	none	2008-11-17
958	BL235	CHEK1	CPSF1(29894), CSTF3(1479), ITPR3(3710), NFS1(9054), OPA1(4976)	HeLa	Nuclear Extract	WT	none	2008-11-17
959	BL938	SP1		HeLa	Nuclear Extract	WT	none	2008-11-17
960	BL580	MDC1		HeLa	Nuclear Extract	WT	none	2008-11-17
961	BL993	MORC2	ACLY(47)	HeLa	Nuclear Extract	WT	none	2008-11-17
962	BL239	RAD17		HeLa	Nuclear Extract	WT	none	2008-11-17
965	BL3961	PES1	ATXN2L(11273), G3BP1(10146)	HeLa S3	Nuclear Extract	WT	none	2008-11-25
966	BL4237	PPP2R1A	OPLAH(26873)	HeLa S3	Nuclear Extract	WT	none	2008-11-25
967	BL4249	PPP2R2B	WRNIP1(56897)	HeLa S3	Nuclear Extract	WT	none	2008-11-25
968	BL4267	PPP2R3B	C13orf3(221150), PAF1(54623)	HeLa S3	Nuclear Extract	WT	none	2008-11-25
969	BL4287	PPP2R5A	GOLGA4(2803), NEDD1(121441), TUBG2(27175)	HeLa S3	Nuclear Extract	WT	none	2008-11-25
970	BL3106	APC	FNBP1(23048)	HeLa S3	Nuclear Extract	WT	none	2008-11-25
971	BL4396	ARFGEF1		HeLa S3	Nuclear Extract	WT	none	2008-11-25
972	BL4381	NASP	KIAA1598(57698)	HeLa S3	Nuclear Extract	WT	none	2008-11-25
974	BL735	TERF2IP		HeLa	Nuclear Extract	WT	none	2008-11-26
975	BL1789	PAXIP1	AKAP8L(26993), PDE3A(5139)	HeLa	Nuclear Extract	WT	none	2008-11-26
976	BL1921	KIAA1967	CCAR1(55749)	HeLa	Nuclear Extract	WT	none	2008-11-26
977	BL3131	PPP2CB	CCDC6(8030), ZBTB40(9923)	HeLa	Nuclear Extract	WT	none	2008-11-26
978	BL3114	PPP4R1		HeLa	Nuclear Extract	WT	none	2008-11-26
979	BL3118	PPP4R2	FBXO28(23219), WBP11(51729)	HeLa	Nuclear Extract	WT	none	2008-11-26
980	BL3822	JMJD1C	SCYL1(57410)	HeLa	Nuclear Extract	WT	none	2008-11-26
990	SC-8002	ESR1	DAZAP1(26528), DDX5(1655)	MCF7	Nuclear Extract	WT	vehicle	2008-12-02
991	SC-8002	ESR1	DAZAP1(26528), DDX5(1655)	MCF7	Nuclear Extract	WT	E2	2008-12-02
992	SC-543	ESR1	CSTF3(1479), DDX5(1655), HK1(3098)	MCF7	Nuclear Extract	WT	vehicle	2008-12-02
993	SC-543	ESR1	CSTF3(1479), DDX5(1655), HK1(3098)	MCF7	Nuclear Extract	WT	E2	2008-12-02
994	a-POT1	POT1		HeLa S3	Nuclear Extract	WT	none	2008-12-03
995	a-TRF2 (4A794)	TERF2		HeLa S3	Nuclear Extract	WT	none	2008-12-03
996	BL2640	TERF2	RANBP2(5903)	HeLa S3	Nuclear Extract	WT	none	2008-12-03
997	BL4464	CEP170	TPR(7175)	HeLa S3	Nuclear Extract	WT	none	2008-12-03
998	BL4670	PPP2R5D	TP53BP1(7158)	HeLa S3	Nuclear Extract	WT	none	2008-12-03
999	BL4805	UBE4B	KIAA1219(57148)	HeLa S3	Nuclear Extract	WT	none	2008-12-03
1000	BL4869	PCM1	CCAR1(55749), MYCBP2(23077)	HeLa S3	Nuclear Extract	WT	none	2008-12-03
1001	BL4905	C19orf2		HeLa S3	Nuclear Extract	WT	none	2008-12-03
1003	SC-6243	TP53	SUPV3L1(6832)	HCT116	Nuclear Extract	WT	IR	2008-12-01
1008	SC-6243	TP53	SUPV3L1(6832)	MCF7	Nuclear Extract	WT	CPT	2008-12-06
1011	ab70171	BAT3		HeLa S3	Nuclear Extract	WT	none	2008-12-08
1012	ab70171	BAT3		HeLa S3	Nuclear Extract	WT	none	2008-12-08
1015	ab70171	BAT3		HeLa S3	Nuclear Extract	WT	none	2008-12-12
1018	ab70171	BAT3		HeLa S3	Cytosolic	WT	none	2008-12-12
1020	BL2262	DOCK9	RABEPK(10244)	HeLa S3	Cytosolic	WT	none	2008-12-11
1021	BL2263	DOCK9	NUMA1(4926)	HeLa S3	Cytosolic	WT	none	2008-12-11
1022	BL2264	DOCK9	DSP(1832), FILIP1L(11259), HECTD3(79654), MAPK8IP3(23162), ZZEF1(23140)	HeLa S3	Cytosolic	WT	none	2008-12-11
1023	BL2443	RPL7		HeLa S3	Cytosolic	WT	none	2008-12-11
1024	BL2444	RPL7		HeLa S3	Cytosolic	WT	none	2008-12-11
1025	BL2791	PTEN	DCTN1(1639), DOCK7(85440)	HeLa S3	Cytosolic	WT	none	2008-12-11
1026	BL3114	PPP4R1		HeLa S3	Cytosolic	WT	none	2008-12-11
1027	BL3118	PPP4R2	FBXO28(23219), WBP11(51729)	HeLa S3	Cytosolic	WT	none	2008-12-11
1028	BL3131	PPP2CB	CCDC6(8030), ZBTB40(9923)	HeLa S3	Cytosolic	WT	none	2008-12-11
1029	BL3923	PPP4C		HeLa S3	Cytosolic	WT	none	2008-12-11
1030	BL4419	FAM91A1	BRWD2(55717), C17orf75(64149), DDHD1(80821), HEXIM1(10614)	HeLa S3	Cytosolic	WT	none	2008-12-11
1031	BL5506	UACA	CSTF3(1479), FRYL(285527), HOMER3(9454), KIAA1429(25962), RIPK1(8737)	HeLa S3	Cytosolic	WT	none	2008-12-11
1032	BL5554	TWISTNB	SEPT2(4735), SEPT9(10801)	HeLa S3	Cytosolic	WT	none	2008-12-11
1033	BL5619	DAXX	ADD1(118), KIAA1797(54914)	HeLa S3	Cytosolic	WT	none	2008-12-11
1034	BL5747	FKBP4		HeLa S3	Cytosolic	WT	none	2008-12-11
1035	BL5777	WTAP		HeLa S3	Cytosolic	WT	none	2008-12-11
1037	BL5913	NUCKS1		HeLa S3	Cytosolic	WT	none	2008-12-11
1038	BL5930	SPAG5		HeLa S3	Cytosolic	WT	none	2008-12-11
1043	BL3800	PALB2	ALMS1(7840), NEK9(91754)	HeLa S3	Nuclear Extract	WT	none	2008-12-12
1044	BL4782	AKT1S1		HeLa S3	Nuclear Extract	WT	none	2008-12-12
1045	BL4827	CEP350	SPATA5(166378), WNK1(65125)	HeLa S3	Nuclear Extract	WT	none	2008-12-12
1046	BL5495	RAD18	ANKRD32(84250), SUGT1(10910), ZBTB40(9923)	HeLa S3	Nuclear Extract	WT	none	2008-12-12
1047	BL5515	FAM129B		HeLa S3	Nuclear Extract	WT	none	2008-12-12
1048	BL5519	PCNT	ZNF507(22847)	HeLa S3	Nuclear Extract	WT	none	2008-12-12
1049	BL5549	DEK	AMPD2(271), WDHD1(11169)	HeLa S3	Nuclear Extract	WT	none	2008-12-12
1050	BL5576	CEP110	STOM(2040)	HeLa S3	Nuclear Extract	WT	none	2008-12-12
1053	BL1258	MDM4	KIAA1429(25962), WTAP(9589), ZC3H13(23091)	MCF7	Nuclear Extract	WT	Cpt	2008-12-11
1054	BL1258	MDM4	KIAA1429(25962), WTAP(9589), ZC3H13(23091)	MCF7	Cytosolic	WT	Cpt	2008-12-11
1056	CS-2126S			MCF7	Nuclear Extract	WT	none	2008-12-10
1061	SATB1 mouse	SATB1		MDA-MB-231	Nuclear Extract	WT	none	2008-12-10
1067	BL409	UPF1	LCN1(3933), LTF(4057)	HeLa S3	Nuclear Extract	WT	none	2008-12-30
1068	BL4419	FAM91A1	BRWD2(55717), C17orf75(64149), DDHD1(80821), HEXIM1(10614)	HeLa S3	Nuclear Extract	WT	none	2008-12-30
1069	BL5963	RAF1		HeLa S3	Nuclear Extract	WT	none	2008-12-30
1070	BL5966	RANBP3		HeLa S3	Nuclear Extract	WT	none	2008-12-30
1071	BL6090	PHC3	MON2(23041), PHACTR4(65979)	HeLa S3	Nuclear Extract	WT	none	2008-12-30
1072	BL6096	MOV10		HeLa S3	Nuclear Extract	WT	none	2008-12-30
1073	BL6174	TDP1		HeLa S3	Nuclear Extract	WT	none	2008-12-30
1074	BL6228	PBXIP1		HeLa S3	Nuclear Extract	WT	none	2008-12-30
1075	SC-28676	SATB1		293T-FRT	Nuclear Extract	ST-WT-SRC3	none	2008-12-15
1077	BL993	MORC2	ACLY(47)	MCF7	Nuclear Extract	WT	none	2008-12-15
1080	SC-48788	FOXG1		HeLa S3	Nuclear Extract	WT	none	2009-01-07
1081	SC-66857	DCLK1		HeLa S3	Nuclear Extract	WT	none	2009-01-07
1082	SC-71539	MAGEA1		HeLa S3	Nuclear Extract	WT	none	2009-01-07
1083	SC-67022	SPDEF	EIF2AK4(440275)	HeLa S3	Nuclear Extract	WT	none	2009-01-07
1084	SC-67285	PPARGC1B		HeLa S3	Nuclear Extract	WT	none	2009-01-07
1085	SC-50347	PIAS4		HeLa S3	Nuclear Extract	WT	none	2009-01-07
1086	SC-67041	PRAME		HeLa S3	Nuclear Extract	WT	none	2009-01-07
1087	SC-67074	SENP1		HeLa S3	Nuclear Extract	WT	none	2009-01-07
1096	ab92734	PJA2	XRCC5(7520)	HeLa S3	Nuclear Extract	WT	none	2009-01-16
1097	ab92734	PJA2	XRCC5(7520)	HeLa S3	Cytosolic	WT	none	2008-12-16
1101	BL4015	PPP1R13B	SATB1(6304)	T-47D	Nuclear Extract	WT	none	2009-01-09
1102	SATB1 mouse	SATB1		T-47D	Nuclear Extract	WT	none	2009-01-09
1111	BL1242	MAML2	NCOA3(8202)	MCF7	Nuclear Extract	WT	none	2009-01-14
1112	BL1242	MAML2	NCOA3(8202)	MCF7	Cytosolic	WT	none	2009-01-14
1115	SC-28749	NCOA4		HeLa S3	Nuclear Extract	WT	none	2009-01-12
1116	SC-33172	GADD45B	CDC27(996)	HeLa S3	Nuclear Extract	WT	none	2009-01-12
1123	BL172	MDM2	DDI2(84301), FLII(2314), PEX13(5194)	HepG2	Nuclear Extract	WT	none	2009-01-22
1124	BL172	MDM2	DDI2(84301), FLII(2314), PEX13(5194)	HepG2	Cytosolic	WT	none	2009-01-22
1125	BL173	MDM2	EPN1(29924)	HepG2	Nuclear Extract	WT	none	2009-01-20
1126	BL173	MDM2	EPN1(29924)	HepG2	Cytosolic	WT	none	2009-01-21
1130	BL175	MDM2	HYOU1(10525)	HepG2	Cytosolic	WT	none	2009-01-23
1134	BL2569	C17orf71		HeLa S3	Nuclear Extract	WT	none	2009-01-28
1135	BL5529	CCDC99	TRIO(7204)	HeLa S3	Nuclear Extract	WT	none	2009-01-28
1136	BL5506	UACA	CSTF3(1479), FRYL(285527), HOMER3(9454), KIAA1429(25962), RIPK1(8737)	HeLa S3	Nuclear Extract	WT	none	2009-01-28
1137	BL5747	FKBP4		HeLa S3	Nuclear Extract	WT	none	2009-01-28
1138	BL5778	TNKS1BP1		HeLa S3	Nuclear Extract	WT	none	2009-01-28
1139	BL5844	ZFC3H1	SKIV2L2(23517)	HeLa S3	Nuclear Extract	WT	none	2009-01-28
1140	BL5913	NUCKS1		HeLa S3	Nuclear Extract	WT	none	2009-01-28
1141	BL5930	SPAG5		HeLa S3	Nuclear Extract	WT	none	2009-01-28
1142	BL1050	C11orf30	HIP1(3092), PCCA(5095)	HeLa S3	Nuclear Extract	WT	none	2009-01-29
1143	BL1110	CENPF		HeLa S3	Nuclear Extract	WT	none	2009-01-29
1144	BL1111	CENPF		HeLa S3	Nuclear Extract	WT	none	2009-01-29
1145	BL2533	OBFC1	SUPT6H(6830)	HeLa S3	Nuclear Extract	WT	none	2009-01-29
1146	BL2607	HDAC1	MSH6(2956), SEC23A(10484)	HeLa S3	Nuclear Extract	WT	none	2009-01-29
1147	BL2794	TRIM24	KCTD15(79047), TRIM28(10155)	HeLa S3	Nuclear Extract	WT	none	2009-01-29
1148	BL2795	TRIM24	POLDIP3(84271)	HeLa S3	Nuclear Extract	WT	none	2009-01-29
1149	BL5941	WNK1	PBRM1(55193)	HeLa S3	Nuclear Extract	WT	none	2009-01-29
1151	BL1021	FAM184B	CDC73(79577), PRMT1(3276), UBR5(51366)	HeLa S3	Nuclear Extract	WT	none	2009-01-30
1152	BL1022	FAM184B	PRMT1(3276), UBR5(51366)	HeLa S3	Nuclear Extract	WT	none	2009-01-30
1153	BL1034	ADNP		HeLa S3	Nuclear Extract	WT	none	2009-01-30
1154	BL1035	KDM1	MVP(9961), TRIM56(81844)	HeLa S3	Nuclear Extract	WT	none	2009-01-30
1155	BL1036	KDM1	LZTR1(8216), MVP(9961)	HeLa S3	Nuclear Extract	WT	none	2009-01-30
1156	BL1037	KDM1		HeLa S3	Nuclear Extract	WT	none	2009-01-30
1157	BL1164	SNIP1	MDC1(9656), PFKP(5214), VASP(7408), ZNF574(64763)	HeLa S3	Nuclear Extract	WT	none	2009-01-30
1158	BL2640	TERF2	RANBP2(5903)	HeLa S3	Nuclear Extract	WT	none	2009-01-30
1159	BL5990	ZNF592		MCF7	Nuclear Extract	WT	none	2009-02-02
1160	CBC621	ZNF687	G3BP1(10146), LRRFIP2(9209)	MCF7	Nuclear Extract	WT	none	2009-02-02
1161	CBC622	ZNF687	DNMT1(1786), USP7(7874)	MCF7	Nuclear Extract	WT	none	2009-02-02
1162	CBC2031	ZMYND8	TBC1D5(9779)	MCF7	Nuclear Extract	WT	none	2009-02-02
1163	CBC2032	ZMYND8		MCF7	Nuclear Extract	WT	none	2009-02-02
1164	BL1327	FOXO3	ZMYND8(23613)	MCF7	Nuclear Extract	WT	none	2009-02-02
1165	BL439	NCOA3		MCF7	Nuclear Extract	WT	none	2009-02-02
1166	SC-543	ESR1	CSTF3(1479), DDX5(1655), HK1(3098)	MCF7	Nuclear Extract	WT	none	2009-02-02
1176	CBC41	NAT10	MEF2D(4209), USP34(9736)	HeLa S3	Nuclear Extract	WT	none	2009-02-03
1177	CBC42	NAT10		HeLa S3	Nuclear Extract	WT	none	2009-02-03
1178	BL1798	BCL11B	CALCOCO1(57658), SDCCAG1(9147)	HeLa S3	Nuclear Extract	WT	none	2009-02-03
1179	BL1800	BCL11B	SF3B3(23450)	HeLa S3	Nuclear Extract	WT	none	2009-02-03
1180	BL2393	CDT1		HeLa S3	Nuclear Extract	WT	none	2009-02-03
1181	BL2394	CDT1	DOCK7(85440)	HeLa S3	Nuclear Extract	WT	none	2009-02-03
1189	BL4015	PPP1R13B	SATB1(6304)	T-47D	Nuclear Extract	WT	none	2009-02-11
1190	SATB1 mouse	SATB1		T-47D	Nuclear Extract	WT	none	2009-02-11
1198	BL1737	CARM1	DDX52(11056), SMARCC2(6601)	HeLa	Nuclear Extract	WT	none	2009-02-10
1199	BL1739	CARM1		HeLa	Nuclear Extract	WT	none	2009-02-10
1201	BL2555	UHRF1		HeLa	Nuclear Extract	WT	none	2009-02-10
1202	BL5906	NFRKB		HeLa	Nuclear Extract	WT	none	2009-02-10
1203	BL1738	CARM1		HeLa	Nuclear Extract	WT	none	2009-02-10
1204	BL5913	NUCKS1		HeLa	Nuclear Extract	WT	none	2009-02-10
1205	BL2569	C17orf71		HeLa	Nuclear Extract	WT	none	2009-02-10
1207	BL922	CUL9	PAN2(9924)	HeLa	Cytosolic	WT	none	2009-02-10
1208	BL1582	E4F1	CCDC91(55297), QRICH1(54870)	HeLa	Cytosolic	WT	none	2009-02-10
1209	BL1023	INTS8	PSME3(10197), STAT3(6774)	HeLa S3	Nuclear Extract	WT	none	2009-02-24
1210	BL1027	INTS9	KIAA0802(23255)	HeLa S3	Nuclear Extract	WT	none	2009-02-24
1211	BL1032	ZMYM3	CSTF3(1479)	HeLa S3	Nuclear Extract	WT	none	2009-02-24
1212	BL1797	BCL11A	CHD8(57680)	HeLa S3	Nuclear Extract	WT	none	2009-02-24
1213	BL1801	BCL11B	C11orf30(56946), TMF1(7110)	HeLa S3	Nuclear Extract	WT	none	2009-02-24
1214	BL1820	IRF3	CLIP1(6249), XPO1(7514)	HeLa S3	Nuclear Extract	WT	none	2009-02-24
1215	BL1823	TAOK3		HeLa S3	Nuclear Extract	WT	none	2009-02-24
1216	BL1874	NCOA6		HeLa S3	Nuclear Extract	WT	none	2009-02-24
1221	BL323	MSH2		HeLa S3	Nuclear Extract	WT	none	2009-03-02
1222	BL333	AURKA	STAT5B(6777)	HeLa S3	Nuclear Extract	WT	none	2009-03-02
1223	BL460	RBM14		HeLa S3	Nuclear Extract	WT	none	2009-03-02
1224	BL463	RBM39		HeLa S3	Nuclear Extract	WT	none	2009-03-02
1225	BL469	AURKA		HeLa S3	Nuclear Extract	WT	none	2009-03-02
1226	BL2666	HDAC2		HeLa S3	Nuclear Extract	WT	none	2009-03-02
1227	BL2787	PSMC5		HeLa S3	Nuclear Extract	WT	none	2009-03-02
1228	BL4508	SMARCAD1		HeLa S3	Nuclear Extract	WT	none	2009-03-02
1229	BL5990	ZNF592		MCF7	Nuclear Extract	WT	E2	2009-03-02
1230	CBC622	ZNF687	DNMT1(1786), USP7(7874)	MCF7	Nuclear Extract	WT	E2	2009-03-02
1231	CBC2031	ZMYND8	TBC1D5(9779)	MCF7	Nuclear Extract	WT	E2	2009-03-02
1232	CBC2032	ZMYND8		MCF7	Nuclear Extract	WT	E2	2009-03-02
1234	SC-8002	ESR1	DAZAP1(26528), DDX5(1655)	MCF7	Nuclear Extract	WT	none	2009-02-26
1235	SC-8002	ESR1	DAZAP1(26528), DDX5(1655)	MCF7	Nuclear Extract	WT	vehicle	2009-02-26
1236	SC-8005	ESR1	SMARCA4(6597)	MCF7	Nuclear Extract	WT	none	2009-02-26
1237	SC-8005	ESR1	SMARCA4(6597)	MCF7	Nuclear Extract	WT	vehicle	2009-02-26
1238	SC-543	ESR1	CSTF3(1479), DDX5(1655), HK1(3098)	MCF7	Nuclear Extract	WT	none	2009-02-26
1239	SC-543	ESR1	CSTF3(1479), DDX5(1655), HK1(3098)	MCF7	Nuclear Extract	WT	vehicle	2009-02-26
1246	BL1706	PHB2	TXNRD1(7296)	HeLa S3	Nuclear Extract	WT	none	2009-03-11
1247	BL1999	DDB1	NIPBL(25836)	HeLa S3	Nuclear Extract	WT	none	2009-03-11
1248	BL2001	RIF1		HeLa S3	Nuclear Extract	WT	none	2009-03-11
1249	BL2003	RIF1		HeLa S3	Nuclear Extract	WT	none	2009-03-11
1251	SC-8005	ESR1	SMARCA4(6597)	HeLa S3	Nuclear Extract	WT	none	2009-03-11
1252	SC-543	ESR1	CSTF3(1479), DDX5(1655), HK1(3098)	HeLa S3	Nuclear Extract	WT	none	2009-03-11
1253	SC-8002	ESR1	DAZAP1(26528), DDX5(1655)	HeLa S3	Nuclear Extract	WT	none	2009-03-11
1255	BL555	TRIM28		HeLa S3	Nuclear Extract	WT	none	2009-03-09
1256	BL587	FEN1		HeLa S3	Nuclear Extract	WT	none	2009-03-09
1257	BL1354	FUS		HeLa S3	Nuclear Extract	WT	none	2009-03-09
1258	BL1461	MAD2L1		HeLa S3	Nuclear Extract	WT	none	2009-03-09
1259	BL1689	MAD1L1		HeLa S3	Nuclear Extract	WT	none	2009-03-09
1260	BL1690	MAD1L1		HeLa S3	Nuclear Extract	WT	none	2009-03-09
1261	BL1794	BCL11A		HeLa S3	Nuclear Extract	WT	none	2009-03-09
1262	BL1796	BCL11A		HeLa S3	Nuclear Extract	WT	none	2009-03-09
1265	BL1327	FOXO3	ZMYND8(23613)	MCF7	Nuclear Pellet	WT	none	2009-02-12
1266	CBC622	ZNF687	DNMT1(1786), USP7(7874)	MCF7	Nuclear Pellet	WT	none	2009-02-12
1270	BL436	NCOA2	GAPVD1(26130), SMARCC2(6601), SPAG9(9043), USO1(8615)	HepG2	Nuclear Extract	WT	none	2009-03-20
1271	BL437	NCOA2	CCDC91(55297)	HepG2	Nuclear Extract	WT	none	2009-03-20
1272	SC-81280	NCOA2	NCOA3(8202), SUPT16H(11198)	HepG2	Nuclear Extract	WT	none	2009-03-20
1273	TIF2	NCOA2		HepG2	Nuclear Extract	WT	none	2009-03-20
1275	SC-6062	RORA		HepG2	Nuclear Extract	WT	none	2009-03-20
1278	BL1731	SPEN		HeLa S3	Nuclear Extract	WT	none	2009-03-16
1279	BL2227	FIGNL1		HeLa S3	Nuclear Extract	WT	none	2009-03-16
1281	BL2436	MED1		HeLa S3	Nuclear Extract	WT	none	2009-03-16
1282	BL2438	PUS1	ZMYM2(7750)	HeLa S3	Nuclear Extract	WT	none	2009-03-16
1283	BL2750	SNW1		HeLa S3	Nuclear Extract	WT	none	2009-03-16
1284	BL2757	CRABP2		HeLa S3	Nuclear Extract	WT	none	2009-03-16
1285	BL2765	HNRNPU		HeLa S3	Nuclear Extract	WT	none	2009-03-16
1286	BL117	ATR	PBRM1(55193)	HeLa S3	Nuclear Extract	WT	none	2009-03-23
1287	BL119	ATR	DDX21(9188)	HeLa S3	Nuclear Extract	WT	none	2009-03-23
1288	BL996	INTS1		HeLa S3	Nuclear Extract	WT	none	2009-03-23
1289	BL1016	INTS6	PYGL(5836)	HeLa S3	Nuclear Extract	WT	none	2009-03-23
1290	BL1576	ESCO1	ZMYND8(23613)	HeLa S3	Nuclear Extract	WT	none	2009-03-23
1291	BL2227	FIGNL1		HeLa S3	Nuclear Extract	WT	none	2009-03-23
1292	BL4102	PRMT6	ATR(545), MORC2(22880)	HeLa S3	Nuclear Extract	WT	none	2009-03-23
1296	ab_M_YW	RFWD3	RTF1(23168)	MCF7	Nuclear Extract	WT	none	2009-03-25
1297	ab_M_YW	RFWD3	RTF1(23168)	MCF7	Nuclear Extract	WT	CPT	2009-03-25
1298	SC-6243	TP53	SUPV3L1(6832)	MCF7	Nuclear Extract	WT	none	2009-03-25
1299	SC-6243	TP53	SUPV3L1(6832)	MCF7	Nuclear Extract	WT	CPT	2009-03-25
1300	BL57	HELLS	QKI(9444)	HeLa S3	Nuclear Extract	WT	none	2009-03-26
1301	BL825	HLTF	YEATS2(55689)	HeLa S3	Nuclear Extract	WT	none	2009-03-26
1302	BL1571	ITCH	UPF3B(65109)	HeLa S3	Nuclear Extract	WT	none	2009-03-26
1303	BL2500	DOT1L	ZMYND8(23613)	HeLa S3	Nuclear Extract	WT	none	2009-03-26
1304	BL2600	BRIP1	ARHGEF18(23370), CEP170(9859), TBC1D4(9882)	HeLa S3	Nuclear Extract	WT	none	2009-03-26
1305	BL333	AURKA	STAT5B(6777)	HeLa S3	Nuclear Extract	WT	none	2009-03-30
1306	BL1755	MED23	CDC42BPB(9578), PLOD1(5351)	HeLa S3	Nuclear Extract	WT	none	2009-03-30
1307	BL2000	RIF1		HeLa S3	Nuclear Extract	WT	none	2009-03-30
1308	BL2229	FIGNL1		HeLa S3	Nuclear Extract	WT	none	2009-03-30
1309	BL2432	NCOA5	RIF1(55183)	HeLa S3	Nuclear Extract	WT	none	2009-03-30
1310	SC-14031	FOXH1		HeLa S3	Nuclear Extract	WT	none	2009-03-30
1311	SC-28195	KLF9		HeLa S3	Nuclear Extract	WT	none	2009-03-30
1312	SC-102125	TAF10		HeLa S3	Nuclear Extract	WT	none	2009-03-30
1317	a-FTO (78)	FTO	EEF1D(1936), KIF20B(9585), NPTX1(4884)	HeLa S3	Nuclear Extract	WT	none	2009-03-24
1318	a-FTO (78)	FTO	EEF1D(1936), KIF20B(9585), NPTX1(4884)	HeLa S3	Nuclear Extract	WT	none	2009-03-24
1319	a-FTO (78)	FTO	EEF1D(1936), KIF20B(9585), NPTX1(4884)	HeLa S3	Cytosolic	WT	none	2009-03-24
1320	a-FTO (78)	FTO	EEF1D(1936), KIF20B(9585), NPTX1(4884)	HeLa S3	Cytosolic	WT	none	2009-03-24
1327	SC-8002	ESR1	DAZAP1(26528), DDX5(1655)	MCF7	Nuclear Extract	WT	E2	2009-03-31
1328	SC-8005	ESR1	SMARCA4(6597)	MCF7	Nuclear Extract	WT	E2	2009-03-31
1329	SC-543	ESR1	CSTF3(1479), DDX5(1655), HK1(3098)	MCF7	Nuclear Extract	WT	E2	2009-03-31
1330	BL436	NCOA2	GAPVD1(26130), SMARCC2(6601), SPAG9(9043), USO1(8615)	HepG2	Cytosolic	WT	none	2009-03-31
1331	BL437	NCOA2	CCDC91(55297)	HepG2	Cytosolic	WT	none	2009-03-31
1332	SC-81280	NCOA2	NCOA3(8202), SUPT16H(11198)	HepG2	Cytosolic	WT	none	2009-03-31
1333	AB80	BRCA1	ANAPC1(64682)	HeLa S3	Nuclear Extract	WT	none	2009-04-06
1334	AB81	BRCA1	RFX5(5993)	HeLa S3	Nuclear Extract	WT	none	2009-04-06
1335	a-ATR (YW)	ATR	PIBF1(10464), TPR(7175), VASP(7408)	HeLa S3	Nuclear Extract	WT	none	2009-04-06
1336	a-BARD1	BARD1	HOOK2(29911), NOS1AP(9722), SCRIB(23513)	HeLa S3	Nuclear Extract	WT	none	2009-04-06
1337	BL320	BRCA2	EP400(57634), GIGYF2(26058), RUVBL2(10856)	HeLa S3	Nuclear Extract	WT	none	2009-04-06
1338	BL1073	AURKB	CDT1(81620)	HeLa S3	Nuclear Extract	WT	none	2009-04-06
1339	BL3800	PALB2	ALMS1(7840), NEK9(91754)	HeLa S3	Nuclear Extract	WT	none	2009-04-06
1340	BL8104	AHDC1	FKBP15(23307)	HeLa S3	Nuclear Extract	WT	none	2009-04-09
1341	BL8105	AHDC1		HeLa S3	Nuclear Extract	WT	none	2009-04-09
1342	BL8106	AHDC1	DLAT(1737)	HeLa S3	Nuclear Extract	WT	none	2009-04-09
1343	BL8107	AHDC1		HeLa S3	Nuclear Extract	WT	none	2009-04-09
1344	BL8108	RAD54L2		HeLa S3	Nuclear Extract	WT	none	2009-04-09
1345	BL8109	RAD54L2	CSNK2A2(1459)	HeLa S3	Nuclear Extract	WT	none	2009-04-09
1346	BL8110	RAD54L2		HeLa S3	Nuclear Extract	WT	none	2009-04-09
1347	BL8111	RAD54L2		HeLa S3	Nuclear Extract	WT	none	2009-04-09
1350	BL1799	BCL11B	COL1A1(1277), TNIP1(10318)	HeLa S3	Nuclear Extract	WT	none	2009-04-07
1351	BL1854	RBM14	DCTN1(1639), HNRNPC(3183), TRIM33(51592)	HeLa S3	Nuclear Extract	WT	none	2009-04-07
1352	BL1855	RBM14	NEK9(91754)	HeLa S3	Nuclear Extract	WT	none	2009-04-07
1353	BL1861	NRIP1		HeLa S3	Nuclear Extract	WT	none	2009-04-07
1354	BL1862	NRIP1	THOC1(9984), THOC2(57187)	HeLa S3	Nuclear Extract	WT	none	2009-04-07
1356	BL1869	TRIP4		HeLa S3	Nuclear Extract	WT	none	2009-04-07
1357	BL1870	TRIP4		HeLa S3	Nuclear Extract	WT	none	2009-04-07
1361	SC-6243	TP53	SUPV3L1(6832)	HeLa S3	Nuclear Extract	WT	none	2009-04-13
1362	BL1826	TAOK3	KIAA1967(57805)	HeLa S3	Nuclear Extract	WT	none	2009-04-13
1363	CBC2152	RFWD3	HNRNPC(3183), HNRNPU(3192), YBX1(4904)	HeLa S3	Nuclear Extract	WT	none	2009-04-13
1364	BL4214	THRAP3		HeLa S3	Nuclear Extract	WT	none	2009-04-13
1365	BL2289	BTBD12	MED15(51586)	HeLa S3	Nuclear Extract	WT	none	2009-04-13
1366	BL2290	BTBD12	ESPL1(9700), TRIM32(22954)	HeLa S3	Nuclear Extract	WT	none	2009-04-13
1367	BL2291	BTBD12	NUDT21(11051), NUP214(8021), TNKS1BP1(85456), WHSC2(7469)	HeLa S3	Nuclear Extract	WT	none	2009-04-13
1368	BL2292	BTBD12	KIF14(9928), KIF23(9493)	HeLa S3	Nuclear Extract	WT	none	2009-04-13
1369	BL991	INCENP	ELP4(26610), IKBKAP(8518)	HeLa S3	Nuclear Extract	WT	none	2009-04-14
1370	BL992	INCENP	FUBP1(8880)	HeLa S3	Nuclear Extract	WT	none	2009-04-14
1371	BL1544	TTK	DMTF1(9988)	HeLa S3	Nuclear Extract	WT	none	2009-04-14
1372	BL1545	TTK		HeLa S3	Nuclear Extract	WT	none	2009-04-14
1373	BL1681	BUB1	SMC2(10592), SMC4(10051)	HeLa S3	Nuclear Extract	WT	none	2009-04-14
1374	BL1684	BUB3	DMXL1(1657), OSBPL3(26031), TTLL4(9654)	HeLa S3	Nuclear Extract	WT	none	2009-04-14
1375	BL2451	TGFB1I1		HeLa S3	Nuclear Extract	WT	none	2009-04-14
1376	BL2452	TGFB1I1		HeLa S3	Nuclear Extract	WT	none	2009-04-14
1378	BL436	NCOA2	GAPVD1(26130), SMARCC2(6601), SPAG9(9043), USO1(8615)	HepG2	Nuclear Extract	WT	none	2009-04-09
1379	BL437	NCOA2	CCDC91(55297)	HepG2	Nuclear Extract	WT	none	2009-04-09
1380	SC-81280	NCOA2	NCOA3(8202), SUPT16H(11198)	HepG2	Nuclear Extract	WT	none	2009-04-09
1381	TIF2	NCOA2		HepG2	Nuclear Extract	WT	none	2009-04-09
1382	BL436	NCOA2	GAPVD1(26130), SMARCC2(6601), SPAG9(9043), USO1(8615)	HepG2	Cytosolic	WT	none	2009-04-09
1383	BL437	NCOA2	CCDC91(55297)	HepG2	Cytosolic	WT	none	2009-04-09
1384	SC-81280	NCOA2	NCOA3(8202), SUPT16H(11198)	HepG2	Cytosolic	WT	none	2009-04-09
1385	TIF2	NCOA2		HepG2	Cytosolic	WT	none	2009-04-09
1386	SC-8987	HNF4A	CPSF6(11052)	HepG2	Nuclear Extract	WT	none	2009-04-09
1389	BL990	INCENP	ACAP2(23527)	HeLa S3	Nuclear Extract	WT	none	2009-04-15
1390	BL1682	BUB1	CIT(11113), PARD3(56288)	HeLa S3	Nuclear Extract	WT	none	2009-04-15
1391	BL1683	BUB1	DDX17(10521), TCERG1(10915), TLE3(7090)	HeLa S3	Nuclear Extract	WT	none	2009-04-15
1392	BL1685	BUB3	SCYL1(57410)	HeLa S3	Nuclear Extract	WT	none	2009-04-15
1393	BL1686	BUB3		HeLa S3	Nuclear Extract	WT	none	2009-04-15
1394	BL1687	BUB3	BICD2(23299), CLPP(8192), ISYNA1(51477), PRMT3(10196)	HeLa S3	Nuclear Extract	WT	none	2009-04-15
1395	BL2384	ERCC4	NR2C2(7182)	HeLa S3	Nuclear Extract	WT	none	2009-04-15
1396	BL2385	ERCC4	BTBD12(84464), PPFIBP1(8496), ZMYND8(23613)	HeLa S3	Nuclear Extract	WT	none	2009-04-15
1398	SC-8396	CCND1		MCF7	Nuclear Extract	WT	E2	2009-04-07
1399	SC-8396	CCND1		MCF7	Nuclear Extract	WT	4HT	2009-04-07
1400	BL436	NCOA2	GAPVD1(26130), SMARCC2(6601), SPAG9(9043), USO1(8615)	HepG2	Nuclear Extract	WT	none	2009-04-07
1401	CBC2031	ZMYND8	TBC1D5(9779)	HepG2	Nuclear Extract	WT	none	2009-04-07
1402	SC-8002	ESR1	DAZAP1(26528), DDX5(1655)	MCF7	Nuclear Extract	WT	0.5% FBS	2009-04-13
1403	SC-8005	ESR1	SMARCA4(6597)	MCF7	Nuclear Extract	WT	0.5% FBS	2009-04-13
1404	SC-543	ESR1	CSTF3(1479), DDX5(1655), HK1(3098)	MCF7	Nuclear Extract	WT	0.5% FBS	2009-04-13
1405	SC-8002	ESR1	DAZAP1(26528), DDX5(1655)	MCF7	Nuclear Extract	WT	EGF 100 ng/ml	2009-04-13
1406	SC-8005	ESR1	SMARCA4(6597)	MCF7	Nuclear Extract	WT	EGF 100 ng/ml	2009-04-13
1407	SC-543	ESR1	CSTF3(1479), DDX5(1655), HK1(3098)	MCF7	Nuclear Extract	WT	EGF 100 ng/ml	2009-04-13
1409	RFX5	RFX5		HeLa S3	Nuclear Extract	WT	none	2009-04-01
1410	ab70171	BAT3		HeLa S3	Nuclear Extract	WT	HU	2009-04-17
1411	BL2840	UIMC1		HeLa S3	Nuclear Extract	WT	HU	2009-04-17
1412	BL3800	PALB2	ALMS1(7840), NEK9(91754)	HeLa S3	Nuclear Extract	WT	HU	2009-04-17
1413	BL235	CHEK1	CPSF1(29894), CSTF3(1479), ITPR3(3710), NFS1(9054), OPA1(4976)	HeLa S3	Nuclear Extract	WT	HU	2009-04-17
1414	a-BARD1	BARD1	HOOK2(29911), NOS1AP(9722), SCRIB(23513)	HeLa S3	Nuclear Extract	WT	HU	2009-04-17
1415	BL373	TOPBP1	SFPQ(6421)	HeLa S3	Nuclear Extract	WT	HU	2009-04-17
1416	AB80	BRCA1	ANAPC1(64682)	HeLa S3	Nuclear Extract	WT	HU	2009-04-17
1417	AB81	BRCA1	RFX5(5993)	HeLa S3	Nuclear Extract	WT	HU	2009-04-17
1418	BL1051	N4BP2	WDHD1(11169)	HeLa S3	Nuclear Extract	WT	none	2009-04-17
1419	BL1052	N4BP2	GIGYF2(26058), UGP2(7360), ZNF598(90850)	HeLa S3	Nuclear Extract	WT	none	2009-04-17
1420	BL1053	N4BP2	SUPT6H(6830), TRIM24(8805), TRIM33(51592)	HeLa S3	Nuclear Extract	WT	none	2009-04-17
1421	SC-28748	TGFB1I1	INTS1(26173)	HeLa S3	Nuclear Extract	WT	none	2009-04-17
1422	BL8230	TOP3A		HeLa S3	Nuclear Extract	WT	none	2009-04-17
1423	BL8231	TOP3A	IRF2BP2(359948), MED23(9439)	HeLa S3	Nuclear Extract	WT	none	2009-04-17
1424	BL8232	TOP3A	GIT1(28964)	HeLa S3	Nuclear Extract	WT	none	2009-04-17
1425	BL8233	TOP3A	CPSF1(29894)	HeLa S3	Nuclear Extract	WT	none	2009-04-17
1426	ab70171	BAT3		HeLa S3	Nuclear Pellet	WT	HU	2009-04-24
1427	BL2840	UIMC1		HeLa S3	Nuclear Pellet	WT	HU	2009-04-24
1428	BL3800	PALB2	ALMS1(7840), NEK9(91754)	HeLa S3	Nuclear Pellet	WT	HU	2009-04-24
1429	BL235	CHEK1	CPSF1(29894), CSTF3(1479), ITPR3(3710), NFS1(9054), OPA1(4976)	HeLa S3	Nuclear Pellet	WT	HU	2009-04-24
1430	a-BARD1	BARD1	HOOK2(29911), NOS1AP(9722), SCRIB(23513)	HeLa S3	Nuclear Pellet	WT	HU	2009-04-24
1431	BL373	TOPBP1	SFPQ(6421)	HeLa S3	Nuclear Pellet	WT	HU	2009-04-24
1432	AB80	BRCA1	ANAPC1(64682)	HeLa S3	Nuclear Pellet	WT	HU	2009-04-24
1433	AB81	BRCA1	RFX5(5993)	HeLa S3	Nuclear Pellet	WT	HU	2009-04-24
1436	BL2693	PRMT1	ANKRD62(342850), HNRNPU(3192), THOC4(10189)	HepG2	Nuclear Extract	WT	none	2009-04-15
1437	a-ABIN1	TNIP1	ZNF326(284695)	HepG2	Nuclear Extract	WT	none	2009-04-15
1440	BL2693	PRMT1	ANKRD62(342850), HNRNPU(3192), THOC4(10189)	HepG2	Cytosolic	WT	none	2009-04-15
1441	a-ABIN1	TNIP1	ZNF326(284695)	HepG2	Cytosolic	WT	none	2009-04-15
1442	a-ATM (Ab-3)	ATM		HeLa S3	Nuclear Extract	WT	none	2009-04-22
1443	JQ006	MSH2		HeLa S3	Nuclear Extract	WT	none	2009-04-22
1444	JQ007	MSH6	INTS1(26173)	HeLa S3	Nuclear Extract	WT	none	2009-04-22
1445	JQ008	IK		HeLa S3	Nuclear Extract	WT	none	2009-04-22
1446	BL324	PMS2		HeLa S3	Nuclear Extract	WT	none	2009-04-22
1447	BL324	PMS2		HeLa S3	Nuclear Extract	WT	none	2009-04-22
1448	BL322	MLH1	STRN3(29966)	HeLa S3	Nuclear Extract	WT	none	2009-04-22
1449	BL322	MLH1	STRN3(29966)	HeLa S3	Nuclear Extract	WT	none	2009-04-22
1450	BL1163	SNIP1	EIF3A(8661), EIF3C(8663)	HeLa S3	Nuclear Extract	WT	none	2009-04-24
1451	BL1475	PNKP		HeLa S3	Nuclear Extract	WT	none	2009-04-24
1452	BL1477	PNKP	DIDO1(11083), DPYSL2(1808), MORC3(23515), SBF1(6305)	HeLa S3	Nuclear Extract	WT	none	2009-04-24
1453	BL2129	RBM15	TLE3(7090)	HeLa S3	Nuclear Extract	WT	none	2009-04-24
1454	BL2131	RBM15		HeLa S3	Nuclear Extract	WT	none	2009-04-24
1455	BL2132	RBM15	DNM2(1785), FAM120B(84498)	HeLa S3	Nuclear Extract	WT	none	2009-04-24
1456	SC-8002	ESR1	DAZAP1(26528), DDX5(1655)	MCF7	Nuclear Extract	WT	EGF 100 ng/ml	2009-04-21
1457	SC-8005	ESR1	SMARCA4(6597)	MCF7	Nuclear Extract	WT	EGF 100 ng/ml	2009-04-21
1458	SC-543	ESR1	CSTF3(1479), DDX5(1655), HK1(3098)	MCF7	Nuclear Extract	WT	EGF 100 ng/ml	2009-04-21
1459	SC-8002	ESR1	DAZAP1(26528), DDX5(1655)	MCF7	Nuclear Extract	WT	0.5% FBS	2009-04-21
1460	SC-8005	ESR1	SMARCA4(6597)	MCF7	Nuclear Extract	WT	0.5% FBS	2009-04-21
1461	SC-543	ESR1	CSTF3(1479), DDX5(1655), HK1(3098)	MCF7	Nuclear Extract	WT	0.5% FBS	2009-04-21
1462	BL2441	RNF4	MSH6(2956), SAFB(6294)	HeLa S3	Nuclear Extract	WT	none	2009-04-27
1463	BL2442	RNF4	DDX17(10521)	HeLa S3	Nuclear Extract	WT	none	2009-04-27
1464	BL2459	DDX17		HeLa S3	Nuclear Extract	WT	none	2009-04-27
1465	BL2461	DDX5		HeLa S3	Nuclear Extract	WT	none	2009-04-27
1466	BL2462	DDX5		HeLa S3	Nuclear Extract	WT	none	2009-04-27
1467	BL1743	CDK7	C12orf10(60314), MAP1S(55201)	MCF7	Nuclear Extract	WT	E2	2009-04-24
1468	a-CCND1 (Ab3)	CCND1	RABEP2(79874)	MCF7	Nuclear Extract	WT	E2	2009-04-24
1469	BL2255	PRKRIR	OSBPL9(114883), TACC3(10460)	MCF7	Nuclear Extract	WT	E2	2009-04-24
1470	BL2155	USP34	C19orf29(58509), HECTD3(79654)	HeLa S3	Nuclear Extract	WT	HU	2009-04-29
1471	BL2156	USP34		HeLa S3	Nuclear Extract	WT	HU	2009-04-29
1472	BL2157	USP34	CBLB(868), DPP9(91039), OGFR(11054), RGS3(5998)	HeLa S3	Nuclear Extract	WT	HU	2009-04-29
1473	BL2193	USP4		HeLa S3	Nuclear Extract	WT	HU	2009-04-29
1474	BL2195	USP4		HeLa S3	Nuclear Extract	WT	HU	2009-04-29
1475	BL2460	DDX17		HeLa S3	Nuclear Extract	WT	HU	2009-04-29
1476	BL2465	NCOA7	PIBF1(10464), SCYL2(55681)	HeLa S3	Nuclear Extract	WT	HU	2009-04-29
1477	BL2466	NCOA7	SMC3(9126), TP53BP1(7158), TRIP11(9321), ZFC3H1(196441)	HeLa S3	Nuclear Extract	WT	HU	2009-04-29
1480	a-FTO (78)	FTO	EEF1D(1936), KIF20B(9585), NPTX1(4884)	HepG2	Cytosolic	WT	none	2009-05-01
1481	BL840	UBE2A	UBXN1(51035)	HeLa S3	Nuclear Extract	WT	none	2009-05-01
1482	BL2195	USP4		HeLa S3	Nuclear Extract	WT	none	2009-05-01
1483	BL2272	TCF12	NOS1AP(9722), PC(5091)	HeLa S3	Nuclear Extract	WT	none	2009-05-01
1484	BL2273	TCF12	PAWR(5074)	HeLa S3	Nuclear Extract	WT	none	2009-05-01
1485	BL2433	UBA3	NCOA5(57727), TARDBP(23435)	HeLa S3	Nuclear Extract	WT	none	2009-05-01
1486	BL2457	UBE2L3	PRDX4(10549)	HeLa S3	Nuclear Extract	WT	none	2009-05-01
1487	BL4805	UBE4B	KIAA1219(57148)	HeLa S3	Nuclear Extract	WT	none	2009-05-01
1488	BL117	ATR	PBRM1(55193)	HeLa S3	Nuclear Extract	WT	HU	2009-05-05
1489	BL237	RAD17	FMN1(342184), NACC2(138151), SFPQ(6421)	HeLa S3	Nuclear Extract	WT	HU	2009-05-05
1490	BL285	RFC5		HeLa S3	Nuclear Extract	WT	HU	2009-05-05
1491	BL2158	USP34	NF1(4763)	HeLa S3	Nuclear Extract	WT	HU	2009-05-05
1492	BL2791	PTEN	DCTN1(1639), DOCK7(85440)	HeLa S3	Nuclear Extract	WT	HU	2009-05-05
1493	BL3893	RAD9A		HeLa S3	Nuclear Extract	WT	HU	2009-05-05
1494	ab_M_YW	RFWD3	RTF1(23168)	HeLa S3	Nuclear Extract	WT	HU	2009-05-05
1495	ab_N_YW	RFWD3		HeLa S3	Nuclear Extract	WT	HU	2009-05-05
1496	CBC2152	RFWD3	HNRNPC(3183), HNRNPU(3192), YBX1(4904)	HeLa S3	Nuclear Extract	WT	HU	2009-05-05
1497	BL2383	TAOK1	TRMT6(51605), UBXN7(26043)	HeLa S3	Nuclear Extract	WT	none	2009-05-05
1498	BL2381	TAOK1	C19orf29(58509)	HeLa S3	Nuclear Extract	WT	none	2009-05-05
1500	BL2286	ZC3H13		HeLa S3	Nuclear Extract	WT	none	2009-05-05
1501	BL2285	ZC3H13		HeLa S3	Nuclear Extract	WT	none	2009-05-05
1503	BL2133	SSBP3	CARM1(10498), MTOR(2475)	HeLa S3	Nuclear Extract	WT	none	2009-05-05
1525	SC-6243	TP53	SUPV3L1(6832)	H1299	Nuclear Extract	WT	none	2009-05-05
1526	SC-6243	TP53	SUPV3L1(6832)	H1299	Cytosolic	WT	none	2009-05-05
1530	a-CCND1 (Ab3)	CCND1	RABEP2(79874)	MCF7	Nuclear Extract	WT	4HT	2009-05-05
1531	BL1743	CDK7	C12orf10(60314), MAP1S(55201)	MCF7	Nuclear Extract	WT	4HT	2009-05-05
1532	BL2255	PRKRIR	OSBPL9(114883), TACC3(10460)	MCF7	Nuclear Extract	WT	4HT	2009-05-05
1534	BL1103	CENPB		HeLa S3	Nuclear Extract	WT	HU	2009-05-06
1535	BL1104	CENPB	CAPRIN1(4076), CHD7(55636)	HeLa S3	Nuclear Extract	WT	HU	2009-05-06
1536	BL1105	CENPC1		HeLa S3	Nuclear Extract	WT	HU	2009-05-06
1537	BL1106	CENPC1		HeLa S3	Nuclear Extract	WT	HU	2009-05-06
1538	BL1109	CENPF		HeLa S3	Nuclear Extract	WT	HU	2009-05-06
1539	BL2453	ZFPM2	EMG1(10436), ROCK2(9475)	HeLa S3	Nuclear Extract	WT	HU	2009-05-06
1540	BL2454	ZFPM2	ZBED1(9189)	HeLa S3	Nuclear Extract	WT	HU	2009-05-06
1541	BL2507	TLK1	ETF1(2107)	HeLa S3	Cytosolic	WT	none	2009-05-10
1542	BL2512	TLK2		HeLa S3	Cytosolic	WT	none	2009-05-10
1543	BL2555	UHRF1		HeLa S3	Cytosolic	WT	none	2009-05-10
1544	BL3121	SMEK1		HeLa S3	Cytosolic	WT	none	2009-05-10
1545	BL3463	CASC5	MDC1(9656)	HeLa S3	Cytosolic	WT	none	2009-05-10
1546	BL4031	BCAS2		HeLa S3	Cytosolic	WT	none	2009-05-10
1547	BL4209	TCEB3		HeLa S3	Cytosolic	WT	none	2009-05-10
1548	BL5398	FAM175B	PACS1(55690), WDHD1(11169)	HeLa S3	Cytosolic	WT	none	2009-05-10
1549	BL5495	RAD18	ANKRD32(84250), SUGT1(10910), ZBTB40(9923)	HeLa S3	Cytosolic	WT	none	2009-07-22
1550	BL5519	PCNT	ZNF507(22847)	HeLa S3	Cytosolic	WT	none	2009-07-22
1551	BL5529	CCDC99	TRIO(7204)	HeLa S3	Cytosolic	WT	none	2009-07-22
1552	BL5549	DEK	AMPD2(271), WDHD1(11169)	HeLa S3	Cytosolic	WT	none	2009-07-22
1553	BL5576	CEP110	STOM(2040)	HeLa S3	Cytosolic	WT	none	2009-07-22
1554	BL5829	PHF6	RRM2(6241)	HeLa S3	Cytosolic	WT	none	2009-07-22
1555	BL5844	ZFC3H1	SKIV2L2(23517)	HeLa S3	Cytosolic	WT	none	2009-07-22
1567	a-CCND1 (Ab3)	CCND1	RABEP2(79874)	MCF7	Cytosolic	WT	none	2009-05-05
1569	a-CCND1 (Ab3)	CCND1	RABEP2(79874)	MCF7	Cytosolic	WT	4HT	2009-05-05
1570	BL2255	PRKRIR	OSBPL9(114883), TACC3(10460)	MCF7	Cytosolic	WT	4HT	2009-05-05
1571	a-CCND1 (Ab3)	CCND1	RABEP2(79874)	MCF7	Cytosolic	WT	E2	2009-05-05
1572	BL2255	PRKRIR	OSBPL9(114883), TACC3(10460)	MCF7	Cytosolic	WT	E2	2009-05-05
1573	BL1743	CDK7	C12orf10(60314), MAP1S(55201)	MCF7	Cytosolic	WT	E2	2009-05-05
1574	BL1035	KDM1	MVP(9961), TRIM56(81844)	HeLa S3	Nuclear Extract	WT	NaB	2009-05-12
1575	BL1039	RCOR1		HeLa S3	Nuclear Extract	WT	NaB	2009-05-12
1576	BL1734	TBL1XR1	ABCF1(23), TP53BP1(7158)	HeLa S3	Nuclear Extract	WT	NaB	2009-05-12
1577	BL2127	HDAC3		HeLa S3	Nuclear Extract	WT	NaB	2009-05-12
1578	BL2587	NCOR2	MVP(9961), TFG(10342)	HeLa S3	Nuclear Extract	WT	NaB	2009-05-12
1579	BL2608	HDAC1		HeLa S3	Nuclear Extract	WT	NaB	2009-05-12
1580	BL2667	HDAC2		HeLa S3	Nuclear Extract	WT	NaB	2009-05-12
1581	BL2731	SIN3A		HeLa S3	Nuclear Extract	WT	NaB	2009-05-12
1582	BL1761	CTBP1		HeLa S3	Nuclear Extract	WT	NaB	2009-05-12
1583	BL2438	PUS1	ZMYM2(7750)	HeLa S3	Nuclear Extract	WT	NaB	2009-05-12
1584	BL2784	PARK7	MTA2(9219)	HeLa S3	Nuclear Extract	WT	NaB	2009-05-12
1585	BL2986	RBBP4	SUPT5H(6829)	HeLa S3	Nuclear Extract	WT	NaB	2009-05-12
1586	BL4546	HMG20B	FYCO1(79443)	HeLa S3	Nuclear Extract	WT	NaB	2009-05-12
1587	BL6636	FOXK2		HeLa S3	Nuclear Extract	WT	NaB	2009-05-12
1588	CBC2031	ZMYND8	TBC1D5(9779)	HeLa S3	Nuclear Extract	WT	NaB	2009-05-12
1589	CBC421	C14orf43		HeLa S3	Nuclear Extract	WT	NaB	2009-05-12
1590	BL-ATM	ATM	TUBGCP3(10426)	HeLa S3	Nuclear Extract	WT	HU	2009-05-11
1591	CBC622	ZNF687	DNMT1(1786), USP7(7874)	HeLa S3	Nuclear Extract	WT	HU	2009-05-11
1592	JQ007	MSH6	INTS1(26173)	HeLa S3	Nuclear Extract	WT	HU	2009-05-11
1593	BL324	PMS2		HeLa S3	Nuclear Extract	WT	HU	2009-05-11
1594	BL1582	E4F1	CCDC91(55297), QRICH1(54870)	HeLa S3	Nuclear Extract	WT	HU	2009-05-11
1595	BL2790	PTEN	NES(10763), RBM12(10137), RNF20(56254)	HeLa S3	Nuclear Extract	WT	HU	2009-05-11
1596	BL5398	FAM175B	PACS1(55690), WDHD1(11169)	HeLa S3	Nuclear Extract	WT	HU	2009-05-11
1597	BL5495	RAD18	ANKRD32(84250), SUGT1(10910), ZBTB40(9923)	HeLa S3	Nuclear Extract	WT	HU	2009-05-11
1601	BL809	PRKAA1	VAC14(55697)	HeLa S3	Cytosolic	WT	HU	2009-05-18
1602	BL810	PRKAA2	ARHGEF7(8874), BCL9L(283149), INPPL1(3636)	HeLa S3	Cytosolic	WT	HU	2009-05-18
1603	BL897	MTOR	ATG7(10533), KIF11(3832)	HeLa S3	Cytosolic	WT	HU	2009-05-18
1604	BL1485	MLST8	NCOA3(8202), PDCD6(10016), SEC31A(22872), VCP(7415)	HeLa S3	Cytosolic	WT	HU	2009-05-18
1605	BL1915	SLK		HeLa S3	Cytosolic	WT	HU	2009-05-18
1606	BL2182	TSC2	KEAP1(9817)	HeLa S3	Cytosolic	WT	HU	2009-05-18
1607	BL2370	SYK	ARID1A(8289), DCP1A(55802), EDC3(80153), SMARCC2(6601)	HeLa S3	Cytosolic	WT	HU	2009-05-18
1608	BL2373	INPPL1	RANBP2(5903)	HeLa S3	Cytosolic	WT	HU	2009-05-18
1609	BL2840	UIMC1		MCF7	Nuclear Extract	WT	none	2009-05-18
1610	a-BARD1	BARD1	HOOK2(29911), NOS1AP(9722), SCRIB(23513)	MCF7	Nuclear Extract	WT	none	2009-05-18
1611	AB80	BRCA1	ANAPC1(64682)	MCF7	Nuclear Extract	WT	none	2009-05-18
1612	AB81	BRCA1	RFX5(5993)	MCF7	Nuclear Extract	WT	none	2009-05-18
1613	BL436	NCOA2	GAPVD1(26130), SMARCC2(6601), SPAG9(9043), USO1(8615)	HepG2	Nuclear Extract	WT	Forskolin	2009-05-19
1615	SC-8987	HNF4A	CPSF6(11052)	HepG2	Nuclear Extract	WT	Forskolin	2009-05-19
1616	SC-7216		IFI44(10561), NCOA3(8202)	MCF7	Nuclear Extract	WT	E2	2009-05-19
1620	a-CCND1 (Ab3)	CCND1	RABEP2(79874)	MCF7	Cytosolic	WT	none	2009-05-20
1622	BL1743	CDK7	C12orf10(60314), MAP1S(55201)	MCF7	Cytosolic	WT	none	2009-05-20
1623	BL961	DNMT1		HeLa S3	Nuclear Extract	WT	HU	2009-05-22
1624	BL2881	CHEK2	SMC2(10592)	HeLa S3	Nuclear Extract	WT	HU	2009-05-22
1625	BL2882	CHEK2	FASN(2194), PRPF8(10594)	HeLa S3	Nuclear Extract	WT	HU	2009-05-22
1626	BL3007	RMI1	BLM(641), PUF60(22827)	HeLa S3	Nuclear Extract	WT	HU	2009-05-22
1627	BL3415	RAD52	DFFA(1676)	HeLa S3	Nuclear Extract	WT	HU	2009-05-22
1628	BL4516	ATRX	VCP(7415)	HeLa S3	Nuclear Extract	WT	HU	2009-05-22
1629	BL5826	ORC6L	GFPT1(2673)	HeLa S3	Nuclear Extract	WT	HU	2009-05-22
1630	BL7477	CHTF18		HeLa S3	Nuclear Extract	WT	HU	2009-05-22
1632	BL843	PRKD2	COBL(23242)	HeLa S3	Cytosolic	WT	HU	2009-05-26
1633	BL844	PRKD2	AFG3L2(10939), WTAP(9589)	HeLa S3	Cytosolic	WT	HU	2009-05-26
1634	BL1776	STK10	HDDC2(51020)	HeLa S3	Cytosolic	WT	HU	2009-05-26
1635	BL2204	STK3	AKAP6(9472), KIF11(3832), ROCK2(9475), STK4(6789)	HeLa S3	Cytosolic	WT	HU	2009-05-26
1636	BL2381	TAOK1	C19orf29(58509)	HeLa S3	Cytosolic	WT	HU	2009-05-26
1637	BL4773	MTOR	ENAH(55740), MEF2D(4209), VAT1(10493)	HeLa S3	Cytosolic	WT	HU	2009-05-26
1638	BL4774	MTOR	BAIAP2L1(55971)	HeLa S3	Cytosolic	WT	HU	2009-05-26
1639	BL4783	AKT1S1	ARHGAP17(55114), USP25(29761)	HeLa S3	Cytosolic	WT	HU	2009-05-26
1640	BL1023	INTS8	PSME3(10197), STAT3(6774)	HeLa S3	Cytosolic	WT	none	2009-05-13
1643	BL1035	KDM1	MVP(9961), TRIM56(81844)	HeLa S3	Cytosolic	WT	none	2009-05-13
1644	BL1036	KDM1	LZTR1(8216), MVP(9961)	HeLa S3	Cytosolic	WT	none	2009-05-13
1645	BL1037	KDM1		HeLa S3	Cytosolic	WT	none	2009-05-13
1646	BL1164	SNIP1	MDC1(9656), PFKP(5214), VASP(7408), ZNF574(64763)	HeLa S3	Cytosolic	WT	none	2009-05-13
1647	BL1820	IRF3	CLIP1(6249), XPO1(7514)	HeLa S3	Cytosolic	WT	none	2009-05-13
1648	BL73	CLSPN	DOCK7(85440)	HeLa S3	Nuclear Extract	WT	HU	2009-05-26
1649	BL1308	WRN		HeLa S3	Nuclear Extract	WT	HU	2009-05-26
1650	BL2074	RECQL		HeLa S3	Nuclear Extract	WT	HU	2009-05-26
1651	BL3196	SIRT2	MTA2(9219)	HeLa S3	Nuclear Extract	WT	HU	2009-05-26
1652	BL3199	SIRT2	ARHGEF2(9181), TNIP1(10318)	HeLa S3	Nuclear Extract	WT	HU	2009-05-26
1653	BL4857	CIC	USP25(29761)	HeLa S3	Nuclear Extract	WT	HU	2009-05-26
1654	BL5026	CHD3		HeLa S3	Nuclear Extract	WT	HU	2009-05-26
1655	BL6591	NUMBL	CDKN2AIP(55602)	HeLa S3	Nuclear Extract	WT	HU	2009-05-26
1656	BL749	PELP1	DYNC1H1(1778), MDC1(9656), SEC16A(9919)	HeLa S3	Cytosolic	WT	HU	2009-05-27
1657	BL4554	ATXN10	NACC1(112939), UBR5(51366)	HeLa S3	Cytosolic	WT	HU	2009-05-27
1658	BL4659	PTPN11		HeLa S3	Cytosolic	WT	HU	2009-05-27
1659	BL5892	MAP4K4	IRAK1(3654), MAP3K1(4214), TRIM33(51592), WRNIP1(56897)	HeLa S3	Cytosolic	WT	HU	2009-05-27
1660	BL6127	OXSR1	WNK1(65125)	HeLa S3	Cytosolic	WT	HU	2009-05-27
1661	BL6501	PTK2		HeLa S3	Cytosolic	WT	HU	2009-05-27
1662	BL6649	GRB10	CUX1(1523), ZCCHC6(79670)	HeLa S3	Cytosolic	WT	HU	2009-05-27
1663	BL7051	RELA	SHPK(23729), SPATA5(166378)	HeLa S3	Cytosolic	WT	HU	2009-05-27
1664	BL958	ATAD5	CDC42BPB(9578)	HeLa S3	Nuclear Extract	WT	HU	2009-05-27
1665	BL1238	MAML1		HeLa S3	Nuclear Extract	WT	HU	2009-05-27
1666	BL1304	SETX	ABL1(25)	HeLa S3	Nuclear Extract	WT	HU	2009-05-27
1667	BL2547	CTCF		HeLa S3	Nuclear Extract	WT	HU	2009-05-27
1668	BL2928	BHLHE40	DHX9(1660), PRPF8(10594), SNRNP200(23020)	HeLa S3	Nuclear Extract	WT	HU	2009-05-27
1669	BL3390	E2F1	SMC2(10592)	HeLa S3	Nuclear Extract	WT	HU	2009-05-27
1670	BL3752	CBX8		HeLa S3	Nuclear Extract	WT	HU	2009-05-27
1671	BL4588	CHAF1B		HeLa S3	Nuclear Extract	WT	HU	2009-05-27
1673	BL588	RCHY1	RWDD4A(201965), UNC13C(440279)	HeLa S3	Cytosolic	WT	HU	2009-05-28
1674	BL1296	IRS1	GIT1(28964), GOLGA2(2801), TNKS1BP1(85456)	HeLa S3	Cytosolic	WT	HU	2009-05-28
1675	BL2413	RC3H1	PLOD3(8985)	HeLa S3	Cytosolic	WT	HU	2009-05-28
1676	BL3571	PPP6C	DPYSL2(1808)	HeLa S3	Cytosolic	WT	HU	2009-05-28
1677	BL4659	PTPN11		HeLa S3	Cytosolic	WT	HU	2009-05-28
1678	BL4960	ABI1		HeLa S3	Cytosolic	WT	HU	2009-05-28
1679	BL4961	ABI1	CYFIP1(23191), GBF1(8729), NCKAP1(10787), TSC2(7249)	HeLa S3	Cytosolic	WT	HU	2009-05-28
1680	BL5638	AKAP13	BAIAP2(10458), CDC42BPG(55561), EIF4G1(1981), KIF14(9928)	HeLa S3	Cytosolic	WT	HU	2009-05-28
1681	RET	RET		HeLa S3	Nuclear Extract	WT	HU	2009-05-28
1682	BL476	AHCTF1		HeLa S3	Nuclear Extract	WT	HU	2009-05-28
1683	BL773	TREX1	ATR(545)	HeLa S3	Nuclear Extract	WT	HU	2009-05-28
1684	BL1326	FOXO3	PDE3A(5139), TERF2(7014), TERF2IP(54386)	HeLa S3	Nuclear Extract	WT	HU	2009-05-28
1685	BL1914	RBBP8		HeLa S3	Nuclear Extract	WT	HU	2009-05-28
1686	BL4165	DTL	CPSF6(11052)	HeLa S3	Nuclear Extract	WT	HU	2009-05-28
1687	BL4891	CDC20		HeLa S3	Nuclear Extract	WT	HU	2009-05-28
1688	BL5432	ERCC5	PIBF1(10464)	HeLa S3	Nuclear Extract	WT	HU	2009-05-28
1689	BL6604	CDC42EP3	EPS15(2060), SEC16A(9919)	HeLa S3	Cytosolic	WT	HU	2009-05-29
1690	BL7055	REL		HeLa S3	Cytosolic	WT	HU	2009-05-29
1691	BL7116	MYCBP2	CCAR1(55749), ISYNA1(51477)	HeLa S3	Cytosolic	WT	HU	2009-05-29
1692	BL7201	EPS8L2	HECTD3(79654)	HeLa S3	Cytosolic	WT	HU	2009-05-29
1693	BL7507	SOS1		HeLa S3	Cytosolic	WT	HU	2009-05-29
1694	BL7526	SOS2	PSME3(10197), TUBGCP2(10844), VPRBP(9730)	HeLa S3	Cytosolic	WT	HU	2009-05-29
1695	BL7700	ARHGAP29	KIF14(9928)	HeLa S3	Cytosolic	WT	HU	2009-05-29
1696	BL7720	ARHGEF2		HeLa S3	Cytosolic	WT	HU	2009-05-29
1697	BL3628	KDM3A		HeLa S3	Nuclear Extract	WT	HU	2009-05-29
1698	BL3720	KDM4B	ARHGEF2(9181), CBR1(873), IKBKAP(8518)	HeLa S3	Nuclear Extract	WT	HU	2009-05-29
1699	BL5423	ERCC3	CUX1(1523), RANBP2(5903)	HeLa S3	Nuclear Extract	WT	HU	2009-05-29
1700	BL5424	ERCC3	CEP97(79598), ECHDC1(55862)	HeLa S3	Nuclear Extract	WT	HU	2009-05-29
1701	BL5987	ZNF318	USP7(7874)	HeLa S3	Nuclear Extract	WT	HU	2009-05-29
1702	BL6425	CCNH	GOLGA1(2800), PDXDC1(23042), ZMYM2(7750)	HeLa S3	Nuclear Extract	WT	HU	2009-05-29
1703	BL6436	CCNL2	DIAPH1(1729)	HeLa S3	Nuclear Extract	WT	HU	2009-05-29
1704	BL6443	CCNT2	C11orf61(79684), CDC42BPB(9578), KIF21A(55605)	HeLa S3	Nuclear Extract	WT	HU	2009-05-29
1705	BL6476	EEF2K		HeLa S3	Cytosolic	WT	HU	2009-06-01
1706	BL6694	UTY	CNOT1(23019), FHOD1(29109)	HeLa S3	Cytosolic	WT	HU	2009-06-01
1707	BL7063	CHUK	ARHGEF18(23370), CSTF3(1479), FMNL1(752), RUVBL2(10856)	HeLa S3	Cytosolic	WT	HU	2009-06-01
1708	BL7394	CDK2		HeLa S3	Cytosolic	WT	HU	2009-06-01
1709	BL7552	DICER1	CNOT1(23019), GEMIN5(25929), TRIM33(51592)	HeLa S3	Cytosolic	WT	HU	2009-06-01
1710	BL7841	ARHGEF12	FAM175B(23172), GIT1(28964)	HeLa S3	Cytosolic	WT	HU	2009-06-01
1711	BL7869	RAPGEF2	CABIN1(23523), CAST(831), DIS3L2(129563)	HeLa S3	Cytosolic	WT	HU	2009-06-01
1712	BL8103	SHC1	KIAA0802(23255)	HeLa S3	Cytosolic	WT	HU	2009-06-01
1713	BL1123	RNF41	NACC1(112939), PPP1R12A(4659), PRMT1(3276)	HeLa S3	Cytosolic	WT	HU	2009-06-01
1714	BL1656	SMG1	C1orf112(55732), KLHL7(55975), WDR62(284403)	HeLa S3	Cytosolic	WT	HU	2009-06-01
1715	BL1931	PPP1R10	FKBP15(23307), SCYL2(55681), WTAP(9589)	HeLa S3	Cytosolic	WT	HU	2009-06-01
1716	BL3439	MIS12		HeLa S3	Cytosolic	WT	HU	2009-06-01
1717	BL3655	PSIP1	PACS1(55690)	HeLa S3	Cytosolic	WT	HU	2009-06-01
1718	BL4071	ILKAP	KCTD3(51133), KIF2C(11004), WRNIP1(56897)	HeLa S3	Cytosolic	WT	HU	2009-06-01
1719	BL4577	USP47		HeLa S3	Cytosolic	WT	HU	2009-06-01
1720	BL5507	HDAC7	ARFGEF1(10565), HIP1R(9026)	HeLa S3	Cytosolic	WT	HU	2009-06-01
1721	BL6423	CCNC	LRRFIP1(9208), NACC1(112939)	HeLa S3	Nuclear Extract	WT	HU	2009-06-02
1722	BL6486	ERF	BICD2(23299)	HeLa S3	Nuclear Extract	WT	HU	2009-06-02
1723	BL6487	ERF	IRF2BP2(359948)	HeLa S3	Nuclear Extract	WT	HU	2009-06-02
1724	BL6983	ZBTB40	EML4(27436)	HeLa S3	Nuclear Extract	WT	HU	2009-06-02
1725	BL7633	COBRA1	EDC4(23644), RDBP(7936), SUPV3L1(6832)	HeLa S3	Nuclear Extract	WT	HU	2009-06-02
1726	BL7656	C2orf3	CHD4(1108), XIAP(331)	HeLa S3	Nuclear Extract	WT	HU	2009-06-02
1727	BL7902	POLK		HeLa S3	Nuclear Extract	WT	HU	2009-06-02
1728	BL7903	C16orf53	TPR(7175)	HeLa S3	Nuclear Extract	WT	HU	2009-06-02
1729	BL3841	KDM5B	DDX17(10521)	HeLa S3	Nuclear Extract	WT	HU	2009-06-02
1730	BL4675	DBF4		HeLa S3	Nuclear Extract	WT	HU	2009-06-02
1731	BL6583	NUMB	CCDC6(8030), SH3GL1(6455)	HeLa S3	Nuclear Extract	WT	HU	2009-06-02
1732	BL6598	FBXW7	RNF20(56254), TPD52L2(7165)	HeLa S3	Nuclear Extract	WT	HU	2009-06-02
1733	BL6780	NIPBL	ACACA(31), ATR(545), EML4(27436)	HeLa S3	Nuclear Extract	WT	HU	2009-06-02
1734	BL7111	SATB2	HDLBP(3069), TLE3(7090)	HeLa S3	Nuclear Extract	WT	HU	2009-06-02
1735	BL7535	NOTCH1	C11orf30(56946), TFG(10342), TP53BP2(7159)	HeLa S3	Nuclear Extract	WT	HU	2009-06-02
1736	BL7566	HERC2	SRGAP2(23380), TBK1(29110)	HeLa S3	Nuclear Extract	WT	HU	2009-06-02
1737	BL2310	MLLT3		HeLa S3	Nuclear Extract	WT	HU	2009-06-03
1738	BL2546	CTCF	WRNIP1(56897)	HeLa S3	Nuclear Extract	WT	HU	2009-06-03
1739	BL3200	SIRT1	PACSIN3(29763)	HeLa S3	Nuclear Extract	WT	HU	2009-06-03
1740	BL3203	SIRT1		HeLa S3	Nuclear Extract	WT	HU	2009-06-03
1741	BL3513	KDM4A	KDM4B(23030)	HeLa S3	Nuclear Extract	WT	HU	2009-06-03
1742	BL3907	USP28		HeLa S3	Nuclear Extract	WT	HU	2009-06-03
1743	BL3977	USP10	KIF23(9493), PBRM1(55193), RACGAP1(29127)	HeLa S3	Nuclear Extract	WT	HU	2009-06-03
1744	BL6582	NUMB	BAIAP2(10458), CCAR1(55749), EEF1A2(1917)	HeLa S3	Nuclear Extract	WT	HU	2009-06-03
1745	BL3936	PPP5C	ACAP2(23527), EPPK1(83481), PLEC1(5339)	HeLa S3	Nuclear Extract	WT	HU	2009-06-03
1746	BL4398	ARFGEF2	GAPVD1(26130)	HeLa S3	Nuclear Extract	WT	HU	2009-06-03
1747	BL4457	AATF	TLE3(7090)	HeLa S3	Nuclear Extract	WT	HU	2009-06-03
1748	BL4485	KDM5C	CAMSAP1L1(23271)	HeLa S3	Nuclear Extract	WT	HU	2009-06-03
1749	BL4607	SAFB2	MVP(9961), TP53BP1(7158)	HeLa S3	Nuclear Extract	WT	HU	2009-06-03
1750	BL4793	XPC	EDC4(23644), PRKDC(5591)	HeLa S3	Nuclear Extract	WT	HU	2009-06-03
1751	BL5428	ERCC4	BTBD12(84464)	HeLa S3	Nuclear Extract	WT	HU	2009-06-03
1752	BL6657	GRLF1		HeLa S3	Nuclear Extract	WT	HU	2009-06-03
1753	BL4911	PML		HeLa S3	Nuclear Extract	WT	HU	2009-06-04
1754	BL4912	PML		HeLa S3	Nuclear Extract	WT	HU	2009-06-04
1755	BL4914	TRIM16	WDHD1(11169)	HeLa S3	Nuclear Extract	WT	HU	2009-06-04
1756	BL4938	TRIM56	EDC4(23644), TUBGCP3(10426)	HeLa S3	Nuclear Extract	WT	HU	2009-06-04
1757	BL5166	CDKN2A		HeLa S3	Nuclear Extract	WT	HU	2009-06-04
1758	BL5433	ERCC6		HeLa S3	Nuclear Extract	WT	HU	2009-06-04
1759	BL5502	HDAC6	DCTN1(1639)	HeLa S3	Nuclear Extract	WT	HU	2009-06-04
1760	BL6680	SETD7	PML(5371), TPR(7175), TUBGCP3(10426)	HeLa S3	Nuclear Extract	WT	HU	2009-06-04
1761	BL3631	KDM2A	RPA1(6117)	HeLa S3	Nuclear Extract	WT	HU	2009-06-04
1762	BL3632	KDM2A	HNRNPK(3190)	HeLa S3	Nuclear Extract	WT	HU	2009-06-04
1763	BL5431	ERCC5		HeLa S3	Nuclear Extract	WT	HU	2009-06-04
1764	BL5995	ZNF638	SACS(26278)	HeLa S3	Nuclear Extract	WT	HU	2009-06-04
1765	BL6076	CCNE1	SH3GLB1(51100)	HeLa S3	Nuclear Extract	WT	HU	2009-06-04
1766	BL6379	BCAR1	CEP97(79598)	HeLa S3	Nuclear Extract	WT	HU	2009-06-04
1767	BL6380	BCAR1	SPAG5(10615)	HeLa S3	Nuclear Extract	WT	HU	2009-06-04
1768	BL6754	PHF8		HeLa S3	Nuclear Extract	WT	HU	2009-06-04
1769	BL6755	PHF8	PHF2(5253)	HeLa S3	Nuclear Extract	WT	none	2009-06-05
1770	BL6872	ALMS1	SIN3A(25942), TBC1D4(9882)	HeLa S3	Nuclear Extract	WT	none	2009-06-05
1771	BL6998	ZKSCAN1	KLHL7(55975)	HeLa S3	Nuclear Extract	WT	none	2009-06-05
1772	BL7037	NFKB1	PCBP1(5093)	HeLa S3	Nuclear Extract	WT	none	2009-06-05
1773	BL7041	NFKB2		HeLa S3	Nuclear Extract	WT	none	2009-06-05
1774	BL7075	NFKBIB		HeLa S3	Nuclear Extract	WT	none	2009-06-05
1775	BL7432	ZNF326	SF3B3(23450)	HeLa S3	Nuclear Extract	WT	none	2009-06-05
1776	BL7477	CHTF18		HeLa S3	Nuclear Extract	WT	none	2009-06-05
1777	BL2498	DOT1L		HeLa S3	Nuclear Extract	WT	none	2009-06-05
1778	BL2519	VCP		HeLa S3	Nuclear Extract	WT	none	2009-06-05
1779	BL5118	PAK1	ARHGEF7(8874)	HeLa S3	Nuclear Extract	WT	none	2009-06-05
1780	BL5123	PAK2		HeLa S3	Nuclear Extract	WT	none	2009-06-05
1781	BL5763	IRS2		HeLa S3	Nuclear Extract	WT	none	2009-06-05
1782	BL7502	VPRBP		HeLa S3	Nuclear Extract	WT	none	2009-06-05
1783	BL7546	FOXP3	TERF2IP(54386), TRIM33(51592)	HeLa S3	Nuclear Extract	WT	none	2009-06-05
1784	BL7558	UPF1		HeLa S3	Nuclear Extract	WT	none	2009-06-05
1795	BL2378	RFWD3	LUZP1(7798), SPAG9(9043), TBC1D5(9779)	MCF7	Nuclear Extract	WT	CPT	2009-06-04
1796	BL2378	RFWD3	LUZP1(7798), SPAG9(9043), TBC1D5(9779)	MCF7	Nuclear Extract	WT	none	2009-06-04
1798	ab_M_YW	RFWD3	RTF1(23168)	MCF7	Nuclear Extract	WT	none	2009-06-04
1799	BL6755	PHF8	PHF2(5253)	HeLa S3	Nuclear Extract	WT	HU	2009-06-08
1800	BL6872	ALMS1	SIN3A(25942), TBC1D4(9882)	HeLa S3	Nuclear Extract	WT	HU	2009-06-08
1801	BL6998	ZKSCAN1	KLHL7(55975)	HeLa S3	Nuclear Extract	WT	HU	2009-06-08
1802	BL7037	NFKB1	PCBP1(5093)	HeLa S3	Nuclear Extract	WT	HU	2009-06-08
1803	BL7041	NFKB2		HeLa S3	Nuclear Extract	WT	HU	2009-06-08
1804	BL7075	NFKBIB		HeLa S3	Nuclear Extract	WT	HU	2009-06-08
1805	BL7432	ZNF326	SF3B3(23450)	HeLa S3	Nuclear Extract	WT	HU	2009-06-08
1806	BL7477	CHTF18		HeLa S3	Nuclear Extract	WT	HU	2009-06-08
1807	BL2498	DOT1L		HeLa S3	Nuclear Extract	WT	HU	2009-06-08
1808	BL2519	VCP		HeLa S3	Nuclear Extract	WT	HU	2009-06-08
1809	BL5118	PAK1	ARHGEF7(8874)	HeLa S3	Nuclear Extract	WT	HU	2009-06-08
1810	BL5123	PAK2		HeLa S3	Nuclear Extract	WT	HU	2009-06-08
1811	BL5763	IRS2		HeLa S3	Nuclear Extract	WT	HU	2009-06-08
1812	BL7502	VPRBP		HeLa S3	Nuclear Extract	WT	HU	2009-06-08
1813	BL7546	FOXP3	TERF2IP(54386), TRIM33(51592)	HeLa S3	Nuclear Extract	WT	HU	2009-06-08
1814	BL7558	UPF1		HeLa S3	Nuclear Extract	WT	HU	2009-06-08
1815	BL2700	STK24		HeLa S3	Nuclear Extract	WT	HU	2009-06-08
1816	BL4168	DTL		HeLa S3	Nuclear Extract	WT	HU	2009-06-08
1817	BL4923	TRIM29	GRIPAP1(56850)	HeLa S3	Nuclear Extract	WT	HU	2009-06-08
1818	BL4927	TRIM37		HeLa S3	Nuclear Extract	WT	HU	2009-06-08
1819	BL4935	TRIM47		HeLa S3	Nuclear Extract	WT	HU	2009-06-08
1820	BL4941	TRIM3	TCOF1(6949), TJP1(7082)	HeLa S3	Nuclear Extract	WT	HU	2009-06-08
1821	BL5973	ZC3H11A	KIAA0802(23255), TP53BP1(7158)	HeLa S3	Nuclear Extract	WT	HU	2009-06-08
1822	BL6311	ELL	MAP1S(55201), PACS1(55690)	HeLa S3	Nuclear Extract	WT	HU	2009-06-08
1823	SC-8002	ESR1	DAZAP1(26528), DDX5(1655)	MCF7	Nuclear Extract	WT	4HT	2009-06-05
1824	SC-8005	ESR1	SMARCA4(6597)	MCF7	Nuclear Extract	WT	4HT	2009-06-05
1825	SC-543	ESR1	CSTF3(1479), DDX5(1655), HK1(3098)	MCF7	Nuclear Extract	WT	4HT	2009-06-05
1826	BL2683	PHLPP2	IKBKB(3551), IKBKG(8517)	HeLa S3	Cytosolic	WT	HU	2009-06-11
1829	BL6644	EPS15L1		HeLa S3	Cytosolic	WT	HU	2009-06-11
1830	BL6647	EPS15	EPS15L1(58513)	HeLa S3	Cytosolic	WT	HU	2009-06-11
1831	BL7002	ZMYM4	C2orf44(80304), KIAA0284(283638)	HeLa S3	Cytosolic	WT	HU	2009-06-11
1832	BL7129	CCDC124	ARHGEF7(8874), GOLGA3(2802), PRMT1(3276), UBR5(51366)	HeLa S3	Cytosolic	WT	HU	2009-06-11
1833	BL7683	RNASEN	BRD4(23476), CNOT1(23019), GTF2I(2969), STAT5A(6776)	HeLa S3	Cytosolic	WT	HU	2009-06-11
1834	BL1585	EGFR	BCAR3(8412), LSR(51599)	HeLa S3	Cytosolic	WT	HU	2009-06-11
1835	BL1586	EGFR	SEC23IP(11196)	HeLa S3	Cytosolic	WT	HU	2009-06-11
1836	BL3282	C7orf27		HeLa S3	Cytosolic	WT	HU	2009-06-11
1837	BL4187	USP19	EML3(256364), TP53BP1(7158)	HeLa S3	Cytosolic	WT	HU	2009-06-11
1838	BL6322	SFN		HeLa S3	Cytosolic	WT	HU	2009-06-11
1839	BL7814	ARHGEF11	VAC14(55697)	HeLa S3	Cytosolic	WT	HU	2009-06-11
1840	BL7841	ARHGEF12	FAM175B(23172), GIT1(28964)	HeLa S3	Cytosolic	WT	HU	2009-06-11
1841	BL7844	ARHGEF16	WNK1(65125)	HeLa S3	Cytosolic	WT	HU	2009-06-11
1842	BL1536	TREX1	ATR(545), WDHD1(11169)	HeLa S3	Nuclear Extract	WT	HU	2009-06-12
1843	BL3693	DLGAP5	FKBP15(23307)	HeLa S3	Nuclear Extract	WT	HU	2009-06-12
1844	BL3695	DLGAP5		HeLa S3	Nuclear Extract	WT	HU	2009-06-12
1845	BL3564	CDK5RAP3	NR2C2(7182)	HeLa S3	Nuclear Extract	WT	HU	2009-06-12
1846	BL5117	ILK	TYMP(1890)	HeLa S3	Nuclear Extract	WT	HU	2009-06-12
1847	BL6202	ESRRA	SYNC(81493), TPR(7175)	HeLa S3	Nuclear Extract	WT	HU	2009-06-12
1848	BL6238	TRERF1	ETFA(2108), ROCK2(9475), RRM2(6241)	HeLa S3	Nuclear Extract	WT	HU	2009-06-12
1849	BL6324	ABL1	C9orf86(55684), DYNC1H1(1778)	HeLa S3	Nuclear Extract	WT	HU	2009-06-12
1850	BL6398	BCAR3	RIF1(55183), SDSL(113675)	HeLa S3	Nuclear Extract	WT	HU	2009-06-15
1851	BL6524	BRAF		HeLa S3	Nuclear Extract	WT	HU	2009-06-15
1852	BL6690	KDM5D	PRMT5(10419), RIOK1(83732)	HeLa S3	Nuclear Extract	WT	HU	2009-06-15
1853	BL7062	CHUK	GTF2I(2969), SF3B3(23450)	HeLa S3	Nuclear Extract	WT	HU	2009-06-15
1854	BL7067	IKBKB		HeLa S3	Nuclear Extract	WT	HU	2009-06-15
1855	BL7513	ORC1L	PDE7A(5150), PRMT5(10419), WIZ(58525)	HeLa S3	Nuclear Extract	WT	HU	2009-06-15
1856	BL7647	MAP3K7	INPPL1(3636), PARD3(56288)	HeLa S3	Nuclear Extract	WT	HU	2009-06-15
1857	BL7740	CCNK	LONP1(9361)	HeLa S3	Nuclear Extract	WT	HU	2009-06-15
1858	CBC31	POLDIP3		HeLa S3	Nuclear Extract	WT	HU	2009-06-12
1859	CBC32	POLDIP3	CTNND1(1500)	HeLa S3	Nuclear Extract	WT	HU	2009-06-12
1860	CBC41	NAT10	MEF2D(4209), USP34(9736)	HeLa S3	Nuclear Extract	WT	HU	2009-06-12
1861	CBC42	NAT10		HeLa S3	Nuclear Extract	WT	HU	2009-06-12
1862	CBC52	NAT13	C14orf43(91748)	HeLa S3	Nuclear Extract	WT	HU	2009-06-12
1863	CBC361	MALT1	EDC4(23644), RASAL2(9462)	HeLa S3	Nuclear Extract	WT	HU	2009-06-12
1864	CBC411	AHCTF1	SEPT9(10801)	HeLa S3	Nuclear Extract	WT	HU	2009-06-12
1865	CBC412	AHCTF1	CEP170(9859), USP25(29761)	HeLa S3	Nuclear Extract	WT	HU	2009-06-12
1866	CBC171	AGAP3	ECT2(1894), SF3B3(23450)	HeLa S3	Nuclear Extract	WT	HU	2009-06-17
1867	CBC173	AGAP3		HeLa S3	Nuclear Extract	WT	HU	2009-06-17
1868	CBC174	AGAP3		HeLa S3	Nuclear Extract	WT	HU	2009-06-17
1869	CBC181	BICD2	ZBTB43(23099)	HeLa S3	Nuclear Extract	WT	HU	2009-06-17
1870	CBC182	BICD2		HeLa S3	Nuclear Extract	WT	HU	2009-06-17
1871	CBC183	BICD2	PML(5371), RUVBL2(10856)	HeLa S3	Nuclear Extract	WT	HU	2009-06-17
1872	CBC184	BICD2	FNBP4(23360), UGDH(7358)	HeLa S3	Nuclear Extract	WT	HU	2009-06-17
1873	CBC651	AGAP3	ECT2(1894)	HeLa S3	Nuclear Extract	WT	HU	2009-06-17
1874	CBC191	ERCC6L		HeLa S3	Nuclear Extract	WT	HU	2009-06-17
1875	CBC192	ERCC6L		HeLa S3	Nuclear Extract	WT	HU	2009-06-17
1876	CBC193	ERCC6L	DYNC1H1(1778), STRN(6801)	HeLa S3	Nuclear Extract	WT	HU	2009-06-17
1877	CBC194	ERCC6L	FKBP15(23307), KIAA0196(9897), KIAA1033(23325)	HeLa S3	Nuclear Extract	WT	HU	2009-06-17
1878	CBC681	GIT1	CPSF7(79869)	HeLa S3	Nuclear Extract	WT	HU	2009-06-17
1879	CBC682	GIT1	MDC1(9656), SNRNP200(23020)	HeLa S3	Nuclear Extract	WT	HU	2009-06-17
1880	CBC751	USP9X	PFKM(5213), ZHX3(23051)	HeLa S3	Nuclear Extract	WT	HU	2009-06-17
1881	CBC752	USP9X	RBM45(129831), WRNIP1(56897)	HeLa S3	Nuclear Extract	WT	HU	2009-06-17
1882	CBC12	MAP3K1	PSME3(10197), SSH3(54961), TXLNA(200081)	HeLa S3	Nuclear Extract	WT	none	2009-06-17
1885	CBC2142	ESCO1	FANCA(2175), TRIM28(10155), USP9X(8239)	HeLa S3	Nuclear Extract	WT	none	2009-06-17
1886	CBC2181	NFRKB	C14orf43(91748), MDC1(9656)	HeLa S3	Nuclear Extract	WT	none	2009-06-17
1887	CBC2182	NFRKB	CPSF6(11052), RELA(5970), ZMYND8(23613)	HeLa S3	Nuclear Extract	WT	none	2009-06-17
1888	CBC2201	RXRB	CCDC6(8030), KIF20A(10112)	HeLa S3	Nuclear Extract	WT	none	2009-06-17
1889	CBC2202	RXRB	CSTF3(1479), NADSYN1(55191)	HeLa S3	Nuclear Extract	WT	none	2009-06-17
1890	CBC561	BAT3	ACAP2(23527)	HeLa S3	Nuclear Extract	WT	none	2009-06-17
1891	CBC562	BAT3	PAFAH1B2(5049)	HeLa S3	Nuclear Extract	WT	none	2009-06-17
1892	CBC571	ESPL1	CORO7(79585), CPSF6(11052)	HeLa S3	Nuclear Extract	WT	none	2009-06-17
1893	CBC572	ESPL1	KIAA1804(84451)	HeLa S3	Nuclear Extract	WT	none	2009-06-17
1894	CBC581	KDM5C	STAT1(6772)	HeLa S3	Nuclear Extract	WT	none	2009-06-17
1895	CBC582	KDM5C		HeLa S3	Nuclear Extract	WT	none	2009-06-17
1896	CBC601	RAD18	ASS1(445), LONP1(9361), SEC23IP(11196)	HeLa S3	Nuclear Extract	WT	none	2009-06-17
1897	CBC602	RAD18	BLM(641), EDC4(23644), HNRNPC(3183)	HeLa S3	Nuclear Extract	WT	none	2009-06-17
1898	CBC21	MLST8	ARHGEF2(9181)	HeLa S3	Cytosolic	WT	HU	2009-06-18
1899	CBC22	MLST8	CBL(867), CCDC102A(92922), KIAA0802(23255), MIOS(54468), NADSYN1(55191), STRN(6801)	HeLa S3	Cytosolic	WT	HU	2009-06-18
1900	CBC331	ARAF		HeLa S3	Cytosolic	WT	HU	2009-06-18
1901	CBC332	ARAF	C12orf10(60314), PRDX4(10549)	HeLa S3	Cytosolic	WT	HU	2009-06-18
1902	CBC541	CYLD	BRWD2(55717)	HeLa S3	Cytosolic	WT	HU	2009-06-18
1903	CBC542	CYLD	ROCK2(9475)	HeLa S3	Cytosolic	WT	HU	2009-06-18
1904	CBC551	TACC3		HeLa S3	Cytosolic	WT	HU	2009-06-18
1905	CBC552	TACC3	HOOK3(84376), RUVBL2(10856), WDHD1(11169)	HeLa S3	Cytosolic	WT	HU	2009-06-18
1906	CBC631	AKAP13		HeLa S3	Cytosolic	WT	HU	2009-06-18
1907	CBC632	AKAP13	SPAG9(9043)	HeLa S3	Cytosolic	WT	HU	2009-06-18
1908	CBC701	PALLD	ACAP2(23527)	HeLa S3	Cytosolic	WT	HU	2009-06-18
1909	CBC702	PALLD	CDC16(8881)	HeLa S3	Cytosolic	WT	HU	2009-06-18
1910	CBC1591	ERBB2	ARHGEF7(8874), PAK2(5062)	HeLa S3	Cytosolic	WT	HU	2009-06-18
1911	CBC1592	ERBB2	ARHGEF18(23370), GIT1(28964), PRMT3(10196)	HeLa S3	Cytosolic	WT	HU	2009-06-18
1912	CBC2231	AKAP8	KIAA1967(57805), PRMT5(10419)	HeLa S3	Cytosolic	WT	HU	2009-06-18
1913	CBC2232	AKAP8		HeLa S3	Cytosolic	WT	HU	2009-06-18
1914	CBC611	RNF20	MSL1(339287), RPRD1B(58490), STRN(6801), ZFC3H1(196441)	HeLa S3	Nuclear Extract	WT	none	2009-06-19
1915	CBC641	CC2D1B	DHX9(1660), GTF3C3(9330)	HeLa S3	Nuclear Extract	WT	none	2009-06-19
1916	CBC642	CC2D1B		HeLa S3	Nuclear Extract	WT	none	2009-06-19
1917	CBC652	AGAP4	AGAP3(116988)	HeLa S3	Nuclear Extract	WT	none	2009-06-19
1918	CBC691	GTPBP2	DBNL(28988), DNAJC13(23317)	HeLa S3	Nuclear Extract	WT	none	2009-06-19
1919	CBC692	GTPBP3	ADSL(158), PFKM(5213)	HeLa S3	Nuclear Extract	WT	none	2009-06-19
1920	CBC801		NANS(54187)	HeLa S3	Nuclear Extract	WT	none	2009-06-19
1921	CBC802		BHLHE40(8553), EVI5L(115704), NANS(54187)	HeLa S3	Nuclear Extract	WT	none	2009-06-19
1922	BL1573	CDC2L6		HeLa S3	Nuclear Extract	WT	none	2009-06-19
1923	BL1574	CDC2L6		HeLa S3	Nuclear Extract	WT	none	2009-06-19
1924	BL1756	MED23	FKBP15(23307), SFPQ(6421), SIN3A(25942)	HeLa S3	Nuclear Extract	WT	none	2009-06-19
1925	BL1757	MED23	HEATR2(54919)	HeLa S3	Nuclear Extract	WT	none	2009-06-19
1926	BL2435	MED1	CSTF3(1479)	HeLa S3	Nuclear Extract	WT	none	2009-06-19
1927	BL2841	MED12		HeLa S3	Nuclear Extract	WT	none	2009-06-19
1928	BL2842	MED12	KIAA0664(23277)	HeLa S3	Nuclear Extract	WT	none	2009-06-19
1929	BL2843	MED12	C11orf61(79684)	HeLa S3	Nuclear Extract	WT	none	2009-06-19
1930	BL1751	MED14	CCAR1(55749), DMAP1(55929), NCOA6(23054)	HeLa S3	Nuclear Extract	WT	none	2009-06-22
1931	BL1752	MED14	ANLN(54443), NACC1(112939), WTAP(9589)	HeLa S3	Nuclear Extract	WT	none	2009-06-22
1932	BL1753	MED14	ANLN(54443), ATR(545), BAIAP2(10458)	HeLa S3	Nuclear Extract	WT	none	2009-06-22
1933	BL2758	MED17		HeLa S3	Nuclear Extract	WT	none	2009-06-22
1934	BL2759	MED17	BLM(641), FAM21B(55747), GOLGA1(2800), KDM3B(51780), KIAA0196(9897)	HeLa S3	Nuclear Extract	WT	none	2009-06-22
1935	BL2760	MED17	CARM1(10498), TRAF7(84231), WDHD1(11169)	HeLa S3	Nuclear Extract	WT	none	2009-06-22
1936	BL2761	MED17		HeLa S3	Nuclear Extract	WT	none	2009-06-22
1937	BL2849	MED28		HeLa S3	Nuclear Extract	WT	none	2009-06-22
1938	BL2601	MED24		HeLa S3	Nuclear Extract	WT	HU	2009-06-22
1939	BL2602	MED24		HeLa S3	Nuclear Extract	WT	HU	2009-06-22
1940	BL2845	MED27		HeLa S3	Nuclear Extract	WT	HU	2009-06-22
1941	BL2846	MED27		HeLa S3	Nuclear Extract	WT	HU	2009-06-22
1942	BL2847	MED27	GNPDA1(10007), IDH2(3418), NAB2(4665), NACC1(112939)	HeLa S3	Nuclear Extract	WT	HU	2009-06-22
1943	BL2851	MED18	KIAA0913(23053)	HeLa S3	Nuclear Extract	WT	HU	2009-06-22
1944	BL2852	MED18	C12orf10(60314), DIP2B(57609)	HeLa S3	Nuclear Extract	WT	HU	2009-06-22
1945	BL2853	MED18	CLIP1(6249)	HeLa S3	Nuclear Extract	WT	HU	2009-06-22
1946	SC-8002	ESR1	DAZAP1(26528), DDX5(1655)	MCF7	Nuclear Extract	WT	4HT	2009-06-22
1947	SC-8005	ESR1	SMARCA4(6597)	MCF7	Nuclear Extract	WT	4HT	2009-06-22
1948	SC-543	ESR1	CSTF3(1479), DDX5(1655), HK1(3098)	MCF7	Nuclear Extract	WT	4HT	2009-06-22
1949	BL129	MSH6		HeLa S3	Nuclear Extract	WT	HU	2009-06-23
1950	BL130	MSH6		HeLa S3	Nuclear Extract	WT	HU	2009-06-23
1951	BL1074	AURKB	ARFGEF2(10564), COIL(8161), SH2B1(25970)	HeLa S3	Nuclear Extract	WT	HU	2009-06-23
1952	BL1213	AURKC	BRD4(23476), CREBBP(1387), SEC31A(22872)	HeLa S3	Nuclear Extract	WT	HU	2009-06-23
1953	BL1214	AURKC	SCRIB(23513), SEC31A(22872)	HeLa S3	Nuclear Extract	WT	HU	2009-06-23
1954	BL2798	CCNA1	YEATS2(55689)	HeLa S3	Nuclear Extract	WT	HU	2009-06-23
1955	BL2799	CCNA1	KDM1(23028), MVP(9961)	HeLa S3	Nuclear Extract	WT	HU	2009-06-23
1956	BL2800	CCNA1	BCR(613), MORC2(22880), PCYT2(5833)	HeLa S3	Nuclear Extract	WT	HU	2009-06-23
1957	BL131	MSH6		HeLa S3	Nuclear Extract	WT	HU	2009-06-23
1958	BL132	MSH6		HeLa S3	Nuclear Extract	WT	HU	2009-06-23
1959	BL262	MCM6	DCTN1(1639), NFKB1(4790)	HeLa S3	Nuclear Extract	WT	HU	2009-06-23
1960	BL1049	C11orf30		HeLa S3	Nuclear Extract	WT	HU	2009-06-23
1961	BL1740	CDK7	DDB1(1642), SH3GLB2(56904), VPRBP(9730)	HeLa S3	Nuclear Extract	WT	HU	2009-06-23
1962	BL1741	CDK7	CD2AP(23607), FKBP15(23307), MKI67(4288), RFX5(5993)	HeLa S3	Nuclear Extract	WT	HU	2009-06-23
1963	BL1742	CDK7	KIF11(3832), NUDT21(11051)	HeLa S3	Nuclear Extract	WT	HU	2009-06-23
1964	BL2801	CCNA1	MAD1L1(8379)	HeLa S3	Nuclear Extract	WT	HU	2009-06-23
1965	BL1578	MCM8	USH2A(7399)	HeLa S3	Nuclear Extract	WT	HU	2009-06-24
1966	BL1872	NCOA6	RABEP1(9135)	HeLa S3	Nuclear Extract	WT	HU	2009-06-24
1967	BL1873	NCOA6	COG5(10466), COG6(57511)	HeLa S3	Nuclear Extract	WT	HU	2009-06-24
1968	BL2153	NEK7		HeLa S3	Nuclear Extract	WT	HU	2009-06-24
1969	BL2154	NEK7	RELA(5970), ROCK1(6093)	HeLa S3	Nuclear Extract	WT	HU	2009-06-24
1970	BL2429	NCOA4	BLM(641), KCTD3(51133), SHKBP1(92799), TSC2(7249)	HeLa S3	Nuclear Extract	WT	HU	2009-06-24
1971	BL2430	NCOA4		HeLa S3	Nuclear Extract	WT	HU	2009-06-24
1972	BL2586	NCOR2		HeLa S3	Nuclear Extract	WT	HU	2009-06-24
1973	BL1730	SPEN	PIK3R4(30849), ROCK1(6093)	HeLa S3	Nuclear Extract	WT	HU	2009-06-24
1974	BL1733	SPEN	KLHL7(55975)	HeLa S3	Nuclear Extract	WT	HU	2009-06-24
1975	BL2125	HDAC3		HeLa S3	Nuclear Extract	WT	HU	2009-06-24
1976	BL2126	HDAC3		HeLa S3	Nuclear Extract	WT	HU	2009-06-24
1977	BL2128	HDAC3	RBM15(64783)	HeLa S3	Nuclear Extract	WT	HU	2009-06-24
1978	BL2448	SMARCA4		HeLa S3	Nuclear Extract	WT	HU	2009-06-24
1979	BL2449	SMARCE1	DDX46(9879)	HeLa S3	Nuclear Extract	WT	HU	2009-06-24
1980	BL2730	SIN3A	DCTN1(1639)	HeLa S3	Nuclear Extract	WT	HU	2009-06-24
2002	BL2217	HPS3		HeLa S3	Cytosolic	WT	HU	2009-07-14
2003	BL2218	HPS3		HeLa S3	Cytosolic	WT	HU	2009-07-14
2004	BL2219	HPS3	CNOT1(23019), TFG(10342)	HeLa S3	Cytosolic	WT	HU	2009-07-14
2005	BL2220	HPS3	SHMT1(6470)	HeLa S3	Cytosolic	WT	HU	2009-07-14
2006	BL2249	HPS5	ZBTB33(10009)	HeLa S3	Cytosolic	WT	HU	2009-07-14
2007	BL2250	HPS5		HeLa S3	Cytosolic	WT	HU	2009-07-14
2008	BL2251	HPS5	PDE4DIP(9659), WDR62(284403)	HeLa S3	Cytosolic	WT	HU	2009-07-14
2009	BL2252	HPS5		HeLa S3	Cytosolic	WT	HU	2009-07-14
2010	BL482	MAP3K7IP3	IPO5(3843), IRF2BP1(26145), ROCK2(9475)	HeLa S3	Cytosolic	WT	HU	2009-07-14
2011	BL2388	CUL4A	AFTPH(54812), AP1GBP1(11276), EPRS(2058), HEATR5B(54497)	HeLa S3	Cytosolic	WT	HU	2009-07-14
2012	BL2389	CUL4A	CNOT1(23019)	HeLa S3	Cytosolic	WT	HU	2009-07-14
2013	BL3030	ERBB2	IRF2BP2(359948)	HeLa S3	Cytosolic	WT	HU	2009-07-14
2014	BL3032	ERBB2		HeLa S3	Cytosolic	WT	HU	2009-07-14
2015	BL3033	ERBB2		HeLa S3	Cytosolic	WT	HU	2009-07-14
2016	SC-8396	CCND1		MCF7	Nuclear Extract	WT	none	2009-07-14
2017	a-CCND1 (Ab3)	CCND1	RABEP2(79874)	MCF7	Nuclear Extract	WT	none	2009-07-14
2018	BL330	CDC25A	XIAP(331)	HeLa S3	Cytosolic	WT	HU	2009-07-15
2019	BL562	COPS2	PRDX1(5052), XPO1(7514)	HeLa S3	Cytosolic	WT	HU	2009-07-15
2020	BL1819	IRF3	CLIP1(6249), XPO1(7514)	HeLa S3	Cytosolic	WT	HU	2009-07-15
2021	BL1821	IRF3		HeLa S3	Cytosolic	WT	HU	2009-07-15
2022	BL1822	IRF3		HeLa S3	Cytosolic	WT	HU	2009-07-15
2023	BL2223	COL4A3BP	ALMS1(7840), BLM(641), FIGNL1(63979)	HeLa S3	Cytosolic	WT	HU	2009-07-15
2024	BL2224	COL4A3BP	ALMS1(7840), FANCG(2189), MVP(9961)	HeLa S3	Cytosolic	WT	HU	2009-07-15
2025	BL3038	ERBB4		HeLa S3	Cytosolic	WT	HU	2009-07-15
2026	SC-596	CCNA2	BRWD2(55717), KIAA1967(57805), SPATS2(65244)	HeLa S3	Cytosolic	WT	HU	2009-07-15
2027	BL1460	MAD2L1	CCDC91(55297), SEC31A(22872)	HeLa S3	Cytosolic	WT	HU	2009-07-15
2028	BL1691	MAD1L1		HeLa S3	Cytosolic	WT	HU	2009-07-15
2029	BL1705	PHB2	EML4(27436), IKBKAP(8518), PRDX6(9588)	HeLa S3	Cytosolic	WT	HU	2009-07-15
2030	BL2221	COL4A3BP		HeLa S3	Cytosolic	WT	HU	2009-07-15
2031	BL2365	KIAA0528	BOD1L(259282), HNRNPM(4670)	HeLa S3	Cytosolic	WT	HU	2009-07-15
2032	BL2368	KIAA0528	ISYNA1(51477)	HeLa S3	Cytosolic	WT	HU	2009-07-15
2033	BL3041	ERBB4	WASL(8976), WIPF2(147179)	HeLa S3	Cytosolic	WT	HU	2009-07-15
2034	ab70171	BAT3		HeLa S3	Cytosolic	WT	none	2009-07-20
2035	a-ABIN1	TNIP1	ZNF326(284695)	HeLa S3	Cytosolic	WT	none	2009-07-20
2036	BL1035	KDM1	MVP(9961), TRIM56(81844)	HeLa S3	Cytosolic	WT	none	2009-07-20
2037	BL1326	FOXO3	PDE3A(5139), TERF2(7014), TERF2IP(54386)	HeLa S3	Cytosolic	WT	none	2009-07-20
2038	BL1426	FOXO1	GUSB(2990), NAB1(4664), SASS6(163786)	HeLa S3	Cytosolic	WT	none	2009-07-20
2039	BL1582	E4F1	CCDC91(55297), QRICH1(54870)	HeLa S3	Cytosolic	WT	none	2009-07-20
2040	BL3131	PPP2CB	CCDC6(8030), ZBTB40(9923)	HeLa S3	Cytosolic	WT	none	2009-07-20
2041	BL3923	PPP4C		HeLa S3	Cytosolic	WT	none	2009-07-20
2042	a-CCND1 (Ab3)	CCND1	RABEP2(79874)	HeLa S3	Cytosolic	WT	none	2009-07-20
2043	BL2030	RFWD2	DSP(1832), RUVBL2(10856)	HeLa S3	Cytosolic	WT	none	2009-07-20
2044	BL2158	USP34	NF1(4763)	HeLa S3	Cytosolic	WT	none	2009-07-20
2045	BL2185	TSC2		HeLa S3	Cytosolic	WT	none	2009-07-20
2046	BL2194	USP4	CYFIP1(23191), EML1(2009), RAD50(10111)	HeLa S3	Cytosolic	WT	none	2009-07-20
2047	BL2212	LATS1		HeLa S3	Cytosolic	WT	none	2009-07-20
2048	BL2213	LATS2	ANAPC7(51434), HMBOX1(79618), SHMT1(6470)	HeLa S3	Cytosolic	WT	none	2009-07-20
2049	BL5619	DAXX	ADD1(118), KIAA1797(54914)	HeLa S3	Cytosolic	WT	none	2009-07-20
2050	BL2262	DOCK9	RABEPK(10244)	HeLa S3	Cytosolic	WT	HU	2009-07-21
2051	BL2458	UBE2L3	KCTD15(79047)	HeLa S3	Cytosolic	WT	HU	2009-07-21
2052	BL2693	PRMT1	ANKRD62(342850), HNRNPU(3192), THOC4(10189)	HeLa S3	Cytosolic	WT	HU	2009-07-21
2053	BL2790	PTEN	NES(10763), RBM12(10137), RNF20(56254)	HeLa S3	Cytosolic	WT	HU	2009-07-21
2054	BL2791	PTEN	DCTN1(1639), DOCK7(85440)	HeLa S3	Cytosolic	WT	HU	2009-07-21
2055	BL3114	PPP4R1		HeLa S3	Cytosolic	WT	HU	2009-07-21
2056	BL3118	PPP4R2	FBXO28(23219), WBP11(51729)	HeLa S3	Cytosolic	WT	HU	2009-07-21
2057	BL1034	ADNP		HeLa S3	Nuclear Extract	WT	HU	2009-07-22
2058	BL1073	AURKB	CDT1(81620)	HeLa S3	Nuclear Extract	WT	HU	2009-07-22
2059	BL1681	BUB1	SMC2(10592), SMC4(10051)	HeLa S3	Nuclear Extract	WT	HU	2009-07-22
2060	BL1682	BUB1	CIT(11113), PARD3(56288)	HeLa S3	Nuclear Extract	WT	HU	2009-07-22
2061	BL1683	BUB1	DDX17(10521), TCERG1(10915), TLE3(7090)	HeLa S3	Nuclear Extract	WT	HU	2009-07-22
2062	BL1684	BUB3	DMXL1(1657), OSBPL3(26031), TTLL4(9654)	HeLa S3	Nuclear Extract	WT	HU	2009-07-22
2063	BL1798	BCL11B	CALCOCO1(57658), SDCCAG1(9147)	HeLa S3	Nuclear Extract	WT	HU	2009-07-22
2064	BL1799	BCL11B	COL1A1(1277), TNIP1(10318)	HeLa S3	Nuclear Extract	WT	HU	2009-07-22
2065	BL1575	CDC2L6	CDC2L1(984), CDC2L2(728642)	HeLa S3	Nuclear Extract	WT	HU	2009-07-22
2066	BL1576	ESCO1	ZMYND8(23613)	HeLa S3	Nuclear Extract	WT	HU	2009-07-22
2067	BL1687	BUB3	BICD2(23299), CLPP(8192), ISYNA1(51477), PRMT3(10196)	HeLa S3	Nuclear Extract	WT	HU	2009-07-22
2068	BL1743	CDK7	C12orf10(60314), MAP1S(55201)	HeLa S3	Nuclear Extract	WT	HU	2009-07-22
2069	BL1761	CTBP1		HeLa S3	Nuclear Extract	WT	HU	2009-07-22
2070	BL2393	CDT1		HeLa S3	Nuclear Extract	WT	HU	2009-07-22
2071	BL2394	CDT1	DOCK7(85440)	HeLa S3	Nuclear Extract	WT	HU	2009-07-22
2072	BL2569	C17orf71		HeLa S3	Nuclear Extract	WT	HU	2009-07-22
2073	BL1021	FAM184B	CDC73(79577), PRMT1(3276), UBR5(51366)	HeLa S3	Nuclear Extract	WT	HU	2009-07-22
2074	BL1035	KDM1	MVP(9961), TRIM56(81844)	HeLa S3	Nuclear Extract	WT	HU	2009-07-22
2075	BL1326	FOXO3	PDE3A(5139), TERF2(7014), TERF2IP(54386)	HeLa S3	Nuclear Extract	WT	HU	2009-07-22
2076	BL1426	FOXO1	GUSB(2990), NAB1(4664), SASS6(163786)	HeLa S3	Nuclear Extract	WT	HU	2009-07-22
2077	BL1999	DDB1	NIPBL(25836)	HeLa S3	Nuclear Extract	WT	HU	2009-07-22
2078	BL2385	ERCC4	BTBD12(84464), PPFIBP1(8496), ZMYND8(23613)	HeLa S3	Nuclear Extract	WT	HU	2009-07-22
2081	BL482	MAP3K7IP3	IPO5(3843), IRF2BP1(26145), ROCK2(9475)	HeLa S3	Cytosolic	WT	none	2009-07-23
2082	BL3282	C7orf27		HeLa S3	Cytosolic	WT	none	2009-07-23
2083	BL4783	AKT1S1	ARHGAP17(55114), USP25(29761)	HeLa S3	Cytosolic	WT	none	2009-07-23
2084	BL4960	ABI1		HeLa S3	Cytosolic	WT	none	2009-07-23
2085	BL4961	ABI1	CYFIP1(23191), GBF1(8729), NCKAP1(10787), TSC2(7249)	HeLa S3	Cytosolic	WT	none	2009-07-23
2086	BL5634	AKAP12	AKAP13(11214), C17orf49(124944), DIDO1(11083), NUDCD3(23386)	HeLa S3	Cytosolic	WT	none	2009-07-23
2087	BL5638	AKAP13	BAIAP2(10458), CDC42BPG(55561), EIF4G1(1981), KIF14(9928)	HeLa S3	Cytosolic	WT	none	2009-07-23
2088	BL6604	CDC42EP3	EPS15(2060), SEC16A(9919)	HeLa S3	Cytosolic	WT	none	2009-07-23
2089	BL4071	ILKAP	KCTD3(51133), KIF2C(11004), WRNIP1(56897)	HeLa S3	Cytosolic	WT	none	2009-07-23
2090	BL5507	HDAC7	ARFGEF1(10565), HIP1R(9026)	HeLa S3	Cytosolic	WT	none	2009-07-23
2091	BL6644	EPS15L1		HeLa S3	Cytosolic	WT	none	2009-07-23
2092	BL6647	EPS15	EPS15L1(58513)	HeLa S3	Cytosolic	WT	none	2009-07-23
2093	BL6649	GRB10	CUX1(1523), ZCCHC6(79670)	HeLa S3	Cytosolic	WT	none	2009-07-23
2094	BL7063	CHUK	ARHGEF18(23370), CSTF3(1479), FMNL1(752), RUVBL2(10856)	HeLa S3	Cytosolic	WT	none	2009-07-23
2095	BL7201	EPS8L2	HECTD3(79654)	HeLa S3	Cytosolic	WT	none	2009-07-23
2096	BL7394	CDK2		HeLa S3	Cytosolic	WT	none	2009-07-23
2097	BL749	PELP1	DYNC1H1(1778), MDC1(9656), SEC16A(9919)	HeLa S3	Cytosolic	WT	none	2009-07-23
2098	BL1485	MLST8	NCOA3(8202), PDCD6(10016), SEC31A(22872), VCP(7415)	HeLa S3	Cytosolic	WT	none	2009-07-23
2099	BL1931	PPP1R10	FKBP15(23307), SCYL2(55681), WTAP(9589)	HeLa S3	Cytosolic	WT	none	2009-07-23
2100	BL2683	PHLPP2	IKBKB(3551), IKBKG(8517)	HeLa S3	Cytosolic	WT	none	2009-07-23
2101	BL4773	MTOR	ENAH(55740), MEF2D(4209), VAT1(10493)	HeLa S3	Cytosolic	WT	none	2009-07-23
2102	BL4774	MTOR	BAIAP2L1(55971)	HeLa S3	Cytosolic	WT	none	2009-07-23
2103	BL5892	MAP4K4	IRAK1(3654), MAP3K1(4214), TRIM33(51592), WRNIP1(56897)	HeLa S3	Cytosolic	WT	none	2009-07-23
2104	BL6127	OXSR1	WNK1(65125)	HeLa S3	Cytosolic	WT	none	2009-07-23
2105	BL237	RAD17	FMN1(342184), NACC2(138151), SFPQ(6421)	HeLa S3	Nuclear Extract	WT	none	2009-07-24
2106	BL1304	SETX	ABL1(25)	HeLa S3	Nuclear Extract	WT	none	2009-07-24
2107	BL1914	RBBP8		HeLa S3	Nuclear Extract	WT	none	2009-07-24
2108	BL2074	RECQL		HeLa S3	Nuclear Extract	WT	none	2009-07-24
2109	BL2790	PTEN	NES(10763), RBM12(10137), RNF20(56254)	HeLa S3	Nuclear Extract	WT	none	2009-07-24
2110	BL2791	PTEN	DCTN1(1639), DOCK7(85440)	HeLa S3	Nuclear Extract	WT	none	2009-07-24
2111	BL3936	PPP5C	ACAP2(23527), EPPK1(83481), PLEC1(5339)	HeLa S3	Nuclear Extract	WT	none	2009-07-24
2112	BL7111	SATB2	HDLBP(3069), TLE3(7090)	HeLa S3	Nuclear Extract	WT	none	2009-07-24
2113	BL1730	SPEN	PIK3R4(30849), ROCK1(6093)	HeLa S3	Nuclear Extract	WT	none	2009-07-24
2114	BL2700	STK24		HeLa S3	Nuclear Extract	WT	none	2009-07-24
2115	BL2730	SIN3A	DCTN1(1639)	HeLa S3	Nuclear Extract	WT	none	2009-07-24
2116	BL3199	SIRT2	ARHGEF2(9181), TNIP1(10318)	HeLa S3	Nuclear Extract	WT	none	2009-07-24
2117	BL3200	SIRT1	PACSIN3(29763)	HeLa S3	Nuclear Extract	WT	none	2009-07-24
2118	BL3203	SIRT1		HeLa S3	Nuclear Extract	WT	none	2009-07-24
2119	BL4914	TRIM16	WDHD1(11169)	HeLa S3	Nuclear Extract	WT	none	2009-07-24
2120	BL4923	TRIM29	GRIPAP1(56850)	HeLa S3	Nuclear Extract	WT	none	2009-07-24
2121	BL3907	USP28		HeLa S3	Nuclear Extract	WT	none	2009-07-24
2122	BL4793	XPC	EDC4(23644), PRKDC(5591)	HeLa S3	Nuclear Extract	WT	none	2009-07-24
2123	BL4935	TRIM47		HeLa S3	Nuclear Extract	WT	none	2009-07-24
2124	BL4938	TRIM56	EDC4(23644), TUBGCP3(10426)	HeLa S3	Nuclear Extract	WT	none	2009-07-24
2125	BL4941	TRIM3	TCOF1(6949), TJP1(7082)	HeLa S3	Nuclear Extract	WT	none	2009-07-24
2126	BL5987	ZNF318	USP7(7874)	HeLa S3	Nuclear Extract	WT	none	2009-07-24
2127	BL5995	ZNF638	SACS(26278)	HeLa S3	Nuclear Extract	WT	none	2009-07-24
2128	BL6983	ZBTB40	EML4(27436)	HeLa S3	Nuclear Extract	WT	none	2009-07-24
2129	BL476	AHCTF1		HeLa S3	Nuclear Extract	WT	none	2009-07-25
2130	BL1049	C11orf30		HeLa S3	Nuclear Extract	WT	none	2009-07-25
2131	BL1074	AURKB	ARFGEF2(10564), COIL(8161), SH2B1(25970)	HeLa S3	Nuclear Extract	WT	none	2009-07-25
2134	BL4516	ATRX	VCP(7415)	HeLa S3	Nuclear Extract	WT	none	2009-07-25
2135	BL6324	ABL1	C9orf86(55684), DYNC1H1(1778)	HeLa S3	Nuclear Extract	WT	none	2009-07-25
2136	BL7903	C16orf53	TPR(7175)	HeLa S3	Nuclear Extract	WT	none	2009-07-25
2137	BL6582	NUMB	BAIAP2(10458), CCAR1(55749), EEF1A2(1917)	HeLa S3	Nuclear Extract	WT	none	2009-07-25
2138	BL6583	NUMB	CCDC6(8030), SH3GL1(6455)	HeLa S3	Nuclear Extract	WT	none	2009-07-25
2139	BL2798	CCNA1	YEATS2(55689)	HeLa S3	Nuclear Extract	WT	none	2009-07-25
2140	BL2799	CCNA1	KDM1(23028), MVP(9961)	HeLa S3	Nuclear Extract	WT	none	2009-07-25
2141	BL2800	CCNA1	BCR(613), MORC2(22880), PCYT2(5833)	HeLa S3	Nuclear Extract	WT	none	2009-07-25
2142	BL6076	CCNE1	SH3GLB1(51100)	HeLa S3	Nuclear Extract	WT	none	2009-07-25
2143	BL6423	CCNC	LRRFIP1(9208), NACC1(112939)	HeLa S3	Nuclear Extract	WT	none	2009-07-25
2144	BL6425	CCNH	GOLGA1(2800), PDXDC1(23042), ZMYM2(7750)	HeLa S3	Nuclear Extract	WT	none	2009-07-25
2145	BL6436	CCNL2	DIAPH1(1729)	HeLa S3	Nuclear Extract	WT	none	2009-07-25
2146	BL7740	CCNK	LONP1(9361)	HeLa S3	Nuclear Extract	WT	none	2009-07-25
2147	BL1104	CENPB	CAPRIN1(4076), CHD7(55636)	HeLa S3	Nuclear Extract	WT	none	2009-07-25
2148	BL1109	CENPF		HeLa S3	Nuclear Extract	WT	none	2009-07-25
2149	BL2881	CHEK2	SMC2(10592)	HeLa S3	Nuclear Extract	WT	none	2009-07-25
2150	BL4588	CHAF1B		HeLa S3	Nuclear Extract	WT	none	2009-07-25
2151	BL4857	CIC	USP25(29761)	HeLa S3	Nuclear Extract	WT	none	2009-07-25
2152	BL5026	CHD3		HeLa S3	Nuclear Extract	WT	none	2009-07-25
2153	BL6443	CCNT2	C11orf61(79684), CDC42BPB(9578), KIF21A(55605)	HeLa S3	Nuclear Extract	WT	none	2009-07-25
2154	BL6591	NUMBL	CDKN2AIP(55602)	HeLa S3	Nuclear Extract	WT	none	2009-07-25
2155	BL1734	TBL1XR1	ABCF1(23), TP53BP1(7158)	HeLa S3	Nuclear Extract	WT	HU	2009-07-28
2156	BL2127	HDAC3		HeLa S3	Nuclear Extract	WT	HU	2009-07-28
2157	BL2463	TGS1		HeLa S3	Nuclear Extract	WT	HU	2009-07-28
2159	BL2587	NCOR2	MVP(9961), TFG(10342)	HeLa S3	Nuclear Extract	WT	HU	2009-07-28
2160	BL2588	NCOR2		HeLa S3	Nuclear Extract	WT	HU	2009-07-28
2161	BL3837	KDM5A		HeLa S3	Nuclear Extract	WT	HU	2009-07-28
2162	BL6318	PHF12	ARID3A(1820), NCOA3(8202)	HeLa S3	Nuclear Extract	WT	HU	2009-07-28
2163	BL57	HELLS	QKI(9444)	HeLa S3	Nuclear Extract	WT	HU	2009-07-28
2164	BL825	HLTF	YEATS2(55689)	HeLa S3	Nuclear Extract	WT	HU	2009-07-28
2165	BL2607	HDAC1	MSH6(2956), SEC23A(10484)	HeLa S3	Nuclear Extract	WT	HU	2009-07-28
2166	BL2608	HDAC1		HeLa S3	Nuclear Extract	WT	HU	2009-07-28
2167	BL2666	HDAC2		HeLa S3	Nuclear Extract	WT	HU	2009-07-28
2168	BL2667	HDAC2		HeLa S3	Nuclear Extract	WT	HU	2009-07-28
2169	BL2784	PARK7	MTA2(9219)	HeLa S3	Nuclear Extract	WT	HU	2009-07-28
2170	BL4546	HMG20B	FYCO1(79443)	HeLa S3	Nuclear Extract	WT	HU	2009-07-28
2171	SC-197	MAX	MDC1(9656), RANBP2(5903)	HeLa S3	Nuclear Extract	WT	HU	2009-07-28
2172	BL1461	MAD2L1		HeLa S3	Nuclear Extract	WT	HU	2009-07-28
2173	BL1462	MAD2L1	MAD1L1(8379)	HeLa S3	Nuclear Extract	WT	HU	2009-07-28
2174	BL1688	MAD1L1	STAT3(6774)	HeLa S3	Nuclear Extract	WT	HU	2009-07-28
2175	BL2225	MAPK14	C9orf78(51759)	HeLa S3	Nuclear Extract	WT	HU	2009-07-28
2176	BL3131	PPP2CB	CCDC6(8030), ZBTB40(9923)	HeLa S3	Nuclear Extract	WT	HU	2009-07-28
2177	BL5892	MAP4K4	IRAK1(3654), MAP3K1(4214), TRIM33(51592), WRNIP1(56897)	HeLa S3	Nuclear Extract	WT	HU	2009-07-28
2178	BL5892	MAP4K4	IRAK1(3654), MAP3K1(4214), TRIM33(51592), WRNIP1(56897)	HeLa S3	Nuclear Extract	WT	HU	2009-07-28
2179	BL333	AURKA	STAT5B(6777)	HeLa S3	Nuclear Extract	WT	HU	2009-07-29
2180	BL440	CREBBP	CSNK2A2(1459), PAWR(5074)	HeLa S3	Nuclear Extract	WT	HU	2009-07-29
2181	BL441	CREBBP		HeLa S3	Nuclear Extract	WT	HU	2009-07-29
2182	BL1036	KDM1	LZTR1(8216), MVP(9961)	HeLa S3	Nuclear Extract	WT	HU	2009-07-29
2183	BL1037	KDM1		HeLa S3	Nuclear Extract	WT	HU	2009-07-29
2184	BL1682	BUB1	CIT(11113), PARD3(56288)	HeLa S3	Nuclear Extract	WT	HU	2009-07-29
2185	BL1797	BCL11A	CHD8(57680)	HeLa S3	Nuclear Extract	WT	HU	2009-07-29
2186	BL3434	CRTC1		HeLa S3	Nuclear Extract	WT	HU	2009-07-29
2187	BL73	CLSPN	DOCK7(85440)	HeLa S3	Nuclear Extract	WT	none	2009-07-30
2188	BL1582	E4F1	CCDC91(55297), QRICH1(54870)	HeLa S3	Nuclear Extract	WT	none	2009-07-30
2189	BL3390	E2F1	SMC2(10592)	HeLa S3	Nuclear Extract	WT	none	2009-07-30
2190	BL4165	DTL	CPSF6(11052)	HeLa S3	Nuclear Extract	WT	none	2009-07-30
2191	BL4168	DTL		HeLa S3	Nuclear Extract	WT	none	2009-07-30
2192	BL5423	ERCC3	CUX1(1523), RANBP2(5903)	HeLa S3	Nuclear Extract	WT	none	2009-07-30
2193	BL6311	ELL	MAP1S(55201), PACS1(55690)	HeLa S3	Nuclear Extract	WT	none	2009-07-30
2194	BL7633	COBRA1	EDC4(23644), RDBP(7936), SUPV3L1(6832)	HeLa S3	Nuclear Extract	WT	none	2009-07-30
2195	BL5424	ERCC3	CEP97(79598), ECHDC1(55862)	HeLa S3	Nuclear Extract	WT	none	2009-07-30
2196	BL5428	ERCC4	BTBD12(84464)	HeLa S3	Nuclear Extract	WT	none	2009-07-30
2197	BL5431	ERCC5		HeLa S3	Nuclear Extract	WT	none	2009-07-30
2198	BL5432	ERCC5	PIBF1(10464)	HeLa S3	Nuclear Extract	WT	none	2009-07-30
2199	BL5433	ERCC6		HeLa S3	Nuclear Extract	WT	none	2009-07-30
2200	BL6202	ESRRA	SYNC(81493), TPR(7175)	HeLa S3	Nuclear Extract	WT	none	2009-07-30
2201	BL6487	ERF	IRF2BP2(359948)	HeLa S3	Nuclear Extract	WT	none	2009-07-30
2202	BL1326	FOXO3	PDE3A(5139), TERF2(7014), TERF2IP(54386)	HeLa S3	Nuclear Extract	WT	none	2009-07-30
2203	BL3513	KDM4A	KDM4B(23030)	HeLa S3	Nuclear Extract	WT	none	2009-07-30
2204	BL3720	KDM4B	ARHGEF2(9181), CBR1(873), IKBKAP(8518)	HeLa S3	Nuclear Extract	WT	none	2009-07-30
2205	BL5502	HDAC6	DCTN1(1639)	HeLa S3	Nuclear Extract	WT	none	2009-07-30
2206	BL6598	FBXW7	RNF20(56254), TPD52L2(7165)	HeLa S3	Nuclear Extract	WT	none	2009-07-30
2207	BL6657	GRLF1		HeLa S3	Nuclear Extract	WT	none	2009-07-30
2208	BL7067	IKBKB		HeLa S3	Nuclear Extract	WT	none	2009-07-30
2209	BL7566	HERC2	SRGAP2(23380), TBK1(29110)	HeLa S3	Nuclear Extract	WT	none	2009-07-30
2210	BL1578	MCM8	USH2A(7399)	HeLa S3	Nuclear Extract	WT	none	2009-08-03
2211	BL2429	NCOA4	BLM(641), KCTD3(51133), SHKBP1(92799), TSC2(7249)	HeLa S3	Nuclear Extract	WT	none	2009-08-03
2212	BL2465	NCOA7	PIBF1(10464), SCYL2(55681)	HeLa S3	Nuclear Extract	WT	none	2009-08-03
2213	BL2466	NCOA7	SMC3(9126), TP53BP1(7158), TRIP11(9321), ZFC3H1(196441)	HeLa S3	Nuclear Extract	WT	none	2009-08-03
2214	BL2847	MED27	GNPDA1(10007), IDH2(3418), NAB2(4665), NACC1(112939)	HeLa S3	Nuclear Extract	WT	none	2009-08-03
2215	BL6754	PHF8		HeLa S3	Nuclear Extract	WT	none	2009-08-03
2216	BL6780	NIPBL	ACACA(31), ATR(545), EML4(27436)	HeLa S3	Nuclear Extract	WT	none	2009-08-03
2217	BL7535	NOTCH1	C11orf30(56946), TFG(10342), TP53BP2(7159)	HeLa S3	Nuclear Extract	WT	none	2009-08-03
2218	BL1238	MAML1		HeLa S3	Nuclear Extract	WT	none	2009-08-03
2219	BL3628	KDM3A		HeLa S3	Nuclear Extract	WT	none	2009-08-03
2220	BL3631	KDM2A	RPA1(6117)	HeLa S3	Nuclear Extract	WT	none	2009-08-03
2221	BL3632	KDM2A	HNRNPK(3190)	HeLa S3	Nuclear Extract	WT	none	2009-08-03
2222	BL3841	KDM5B	DDX17(10521)	HeLa S3	Nuclear Extract	WT	none	2009-08-03
2223	BL4485	KDM5C	CAMSAP1L1(23271)	HeLa S3	Nuclear Extract	WT	none	2009-08-03
2224	BL6690	KDM5D	PRMT5(10419), RIOK1(83732)	HeLa S3	Nuclear Extract	WT	none	2009-08-03
2225	BL7647	MAP3K7	INPPL1(3636), PARD3(56288)	HeLa S3	Nuclear Extract	WT	none	2009-08-03
2226	BL4911	PML		HeLa S3	Nuclear Extract	WT	none	2009-08-03
2227	BL4912	PML		HeLa S3	Nuclear Extract	WT	none	2009-08-03
2228	BL5826	ORC6L	GFPT1(2673)	HeLa S3	Nuclear Extract	WT	none	2009-08-03
2229	BL7513	ORC1L	PDE7A(5150), PRMT5(10419), WIZ(58525)	HeLa S3	Nuclear Extract	WT	none	2009-08-03
2230	PHF2-C Ab	PHF2	PHF8(23133)	HeLa S3	Nuclear Extract	WT	none	2009-08-03
2231	UHRF2	UHRF2	RELA(5970)	HeLa S3	Nuclear Extract	WT	none	2009-08-03
2232	UHRF1	UHRF2		HeLa S3	Nuclear Extract	WT	none	2009-08-03
2233	HEXIM1 (JW)	HEXIM1		HeLa S3	Nuclear Extract	WT	none	2009-08-03
2234	a-CCND1 (Ab3)	CCND1	RABEP2(79874)	HeLa S3	Nuclear Extract	WT	none	2009-08-04
2235	CBC2142	ESCO1	FANCA(2175), TRIM28(10155), USP9X(8239)	HeLa S3	Nuclear Extract	WT	none	2009-08-04
2236	BL3415	RAD52	DFFA(1676)	HeLa S3	Nuclear Extract	WT	none	2009-08-04
2237	BL6202	ESRRA	SYNC(81493), TPR(7175)	HeLa S3	Nuclear Extract	WT	none	2009-08-04
2238	BL6680	SETD7	PML(5371), TPR(7175), TUBGCP3(10426)	HeLa S3	Nuclear Extract	WT	none	2009-08-04
2239	BL7394	CDK2		HeLa S3	Nuclear Extract	WT	none	2009-08-04
2240	BL7566	HERC2	SRGAP2(23380), TBK1(29110)	HeLa S3	Nuclear Extract	WT	none	2009-08-04
2241	BL7902	POLK		HeLa S3	Nuclear Extract	WT	none	2009-08-04
2242	CBC31	POLDIP3		HeLa S3	Nuclear Extract	WT	none	2009-08-04
2243	CBC32	POLDIP3	CTNND1(1500)	HeLa S3	Nuclear Extract	WT	none	2009-08-04
2244	BL773	TREX1	ATR(545)	HeLa S3	Nuclear Extract	WT	none	2009-08-04
2245	BL1776	STK10	HDDC2(51020)	HeLa S3	Nuclear Extract	WT	none	2009-08-04
2246	BL3007	RMI1	BLM(641), PUF60(22827)	HeLa S3	Nuclear Extract	WT	none	2009-08-04
2247	BL5987	ZNF318	USP7(7874)	HeLa S3	Nuclear Extract	WT	none	2009-08-04
2248	BL6238	TRERF1	ETFA(2108), ROCK2(9475), RRM2(6241)	HeLa S3	Nuclear Extract	WT	none	2009-08-04
2249	BL7507	SOS1		HeLa S3	Nuclear Extract	WT	none	2009-08-04
2250	CBC751	USP9X	PFKM(5213), ZHX3(23051)	HeLa S3	Nuclear Extract	WT	none	2009-08-04
2251	CBC752	USP9X	RBM45(129831), WRNIP1(56897)	HeLa S3	Nuclear Extract	WT	none	2009-08-04
2252	BL2157	USP34	CBLB(868), DPP9(91039), OGFR(11054), RGS3(5998)	HeLa S3	Nuclear Extract	WT	none	2009-08-04
2253	BL2158	USP34	NF1(4763)	HeLa S3	Nuclear Extract	WT	none	2009-08-04
2254	BL2453	ZFPM2	EMG1(10436), ROCK2(9475)	HeLa S3	Nuclear Extract	WT	none	2009-08-04
2255	BL2454	ZFPM2	ZBED1(9189)	HeLa S3	Nuclear Extract	WT	none	2009-08-04
2256	BL4793	XPC	EDC4(23644), PRKDC(5591)	HeLa S3	Nuclear Extract	WT	none	2009-08-04
2257	BL6983	ZBTB40	EML4(27436)	HeLa S3	Nuclear Extract	WT	none	2009-08-04
2266	BL2030	RFWD2	DSP(1832), RUVBL2(10856)	HeLa S3	Nuclear Extract	WT	none	2009-08-14
2267	BL2031	RFWD2	DDX20(11218), GEMIN5(25929), PPP1R12A(4659), TACC3(10460)	HeLa S3	Nuclear Extract	WT	none	2009-08-14
2268	BL2032	RFWD2	CAPRIN1(4076), G3BP1(10146), NCOA6(23054)	HeLa S3	Nuclear Extract	WT	none	2009-08-14
2269	BL3342	EVI5		HeLa S3	Nuclear Extract	WT	none	2009-08-14
2271	BL3961	PES1	ATXN2L(11273), G3BP1(10146)	HeLa S3	Nuclear Extract	WT	none	2009-08-14
2272	BL3964	PES1	BOP1(23246), DDX27(55661)	HeLa S3	Nuclear Extract	WT	none	2009-08-14
2273	BL4950	HMGN3	DPYSL2(1808), WDR91(29062)	HeLa S3	Nuclear Extract	WT	none	2009-08-14
2274	BL4952	HMGN3		HeLa S3	Nuclear Extract	WT	none	2009-08-14
2275	BL4650	KIF22	ATR(545), IRF2BP2(359948)	HeLa S3	Nuclear Extract	WT	none	2009-08-14
2276	BL4651	KIF22	GMIP(51291), HAUS6(54801), LRRFIP1(9208)	HeLa S3	Nuclear Extract	WT	none	2009-08-14
2277	BL5021	CHD1	CC2D1A(54862), KCTD3(51133), KIAA1244(57221), SHKBP1(92799)	HeLa S3	Nuclear Extract	WT	none	2009-08-14
2278	BL5022	CHD1	PFKFB3(5209)	HeLa S3	Nuclear Extract	WT	none	2009-08-14
2279	BL5030	CHD6	RUVBL2(10856), USP4(7375)	HeLa S3	Nuclear Extract	WT	none	2009-08-14
2280	BL5036	CHD8	FKBP15(23307)	HeLa S3	Nuclear Extract	WT	none	2009-08-14
2281	BL5049	POLD3		HeLa S3	Nuclear Extract	WT	none	2009-08-14
2282	BL5061	POLH	ARHGAP17(55114), PPP1R13L(10848), WDHD1(11169)	HeLa S3	Nuclear Extract	WT	none	2009-08-14
2283	BL2097	NMI	CDC27(996), UBR5(51366)	HeLa S3	Nuclear Extract	WT	none	2009-08-14
2284	BL2099	NMI	VCP(7415)	HeLa S3	Nuclear Extract	WT	none	2009-08-14
2285	BL2505	PITX1	CYFIP1(23191)	HeLa S3	Nuclear Extract	WT	none	2009-08-14
2286	BL3194	CDX2	TRIM47(91107)	HeLa S3	Nuclear Extract	WT	none	2009-08-14
2287	BL3195	CDX2		HeLa S3	Nuclear Extract	WT	none	2009-08-14
2290	BL3348	ATN1	WDR5(11091)	HeLa S3	Nuclear Extract	WT	none	2009-08-14
2291	BL5054	POLE3	BAZ1A(11177), YEATS2(55689)	HeLa S3	Nuclear Extract	WT	none	2009-08-17
2293	BL5074	FANCI	UBR4(23352)	HeLa S3	Nuclear Extract	WT	none	2009-08-17
2294	BL5315	POLI	CEP170(9859), HMMR(3161), SF3B1(23451), WRNIP1(56897)	HeLa S3	Nuclear Extract	WT	none	2009-08-17
2295	BL5316	POLI		HeLa S3	Nuclear Extract	WT	none	2009-08-17
2296	BL5618	DAXX	ARHGAP10(79658), SMC2(10592)	HeLa S3	Nuclear Extract	WT	none	2009-08-17
2297	BL5655	ANKS3	ANKS6(203286), ESCO2(157570), MTDH(92140), NEK7(140609), SSNA1(8636)	HeLa S3	Nuclear Extract	WT	none	2009-08-17
2298	BL5657	ANKZF1	BAT3(7917), GIGYF2(26058), TUBGCP3(10426), VCP(7415)	HeLa S3	Nuclear Extract	WT	none	2009-08-17
2299	BL5659	ANKZF1	MCM5(4174), VCP(7415)	HeLa S3	Nuclear Extract	WT	none	2009-08-17
2300	BL5993	ZNF638	SMC3(9126), UBR4(23352)	HeLa S3	Nuclear Extract	WT	none	2009-08-17
2301	BL5995	ZNF638	SACS(26278)	HeLa S3	Nuclear Extract	WT	none	2009-08-17
2302	BL6259	MBD4	WRNIP1(56897)	HeLa S3	Nuclear Extract	WT	none	2009-08-17
2303	BL6260	MBD4	ATM(472), FKBP15(23307), PPP1R12A(4659), SPATA5(166378)	HeLa S3	Nuclear Extract	WT	none	2009-08-17
2304	BL6305	POLL		HeLa S3	Nuclear Extract	WT	none	2009-08-17
2305	BL6306	POLL		HeLa S3	Nuclear Extract	WT	none	2009-08-17
2306	BL6497	EVI1	ENAH(55740), NF1(4763)	HeLa S3	Nuclear Extract	WT	none	2009-08-17
2307	BL6498	EVI1	HUWE1(10075), SMARCC1(6599), SULT1A3(6818)	HeLa S3	Nuclear Extract	WT	none	2009-08-17
2308	BL5619	DAXX	ADD1(118), KIAA1797(54914)	HeLa S3	Nuclear Extract	WT	none	2009-08-17
2309	BL5646	ANKIB1		HeLa S3	Nuclear Extract	WT	none	2009-08-17
2311	BL5670	KANK2		HeLa S3	Nuclear Extract	WT	none	2009-08-17
2312	BL5687	ANKRD57		HeLa S3	Nuclear Extract	WT	none	2009-08-17
2313	BL5689	ANKRD57	GTF2I(2969)	HeLa S3	Nuclear Extract	WT	none	2009-08-17
2314	BL5855	CDCA3	KIF13B(23303), SPAG9(9043)	HeLa S3	Nuclear Extract	WT	none	2009-08-17
2315	BL5856	CDCA3		HeLa S3	Nuclear Extract	WT	none	2009-08-17
2316	BL2670	FANCB	STK4(6789)	HeLa S3	Nuclear Extract	WT	none	2009-08-18
2317	BL6339	ANKRD17	HMHA1(23526)	HeLa S3	Nuclear Extract	WT	none	2009-08-18
2318	BL6340	ANKRD17	DPYSL2(1808)	HeLa S3	Nuclear Extract	WT	none	2009-08-18
2319	BL6410	BCOR	CPSF6(11052)	HeLa S3	Nuclear Extract	WT	none	2009-08-18
2320	BL6413	BCOR	AKAP12(9590), AKAP13(11214), NUDCD3(23386), TRIP13(9319), WDR81(124997)	HeLa S3	Nuclear Extract	WT	none	2009-08-18
2321	BL7270	NRBF2		HeLa S3	Nuclear Extract	WT	none	2009-08-18
2322	BL7271	NRBF2		HeLa S3	Nuclear Extract	WT	none	2009-08-18
2323	BL8216	PHRF1	IRF2BP2(359948), KIAA0802(23255), SEC16A(9919)	HeLa S3	Nuclear Extract	WT	none	2009-08-18
2324	BL2671	FANCB	IRF2BP2(359948), RANGAP1(5905), TBC1D8(11138), TP53BP1(7158)	HeLa S3	Nuclear Extract	WT	none	2009-08-18
2325	BL6011	PHIP	TAF4(6874), TRIP10(9322), ZBTB7A(51341)	HeLa S3	Nuclear Extract	WT	none	2009-08-18
2326	BL6012	PHIP	NUP35(129401)	HeLa S3	Nuclear Extract	WT	none	2009-08-18
2327	BL7340	LRWD1	PCF11(51585), SRGAP2(23380), TBK1(29110)	HeLa S3	Nuclear Extract	WT	none	2009-08-18
2328	BL7341	WDFY3	C17orf81(23587), C3orf75(54859), ELP4(26610)	HeLa S3	Nuclear Extract	WT	none	2009-08-18
2329	BL7446	ZNF777	EML3(256364), GIT1(28964)	HeLa S3	Nuclear Extract	WT	none	2009-08-18
2330	BL8332	C1orf55	CCDC88C(440193), HSPBAP1(79663), ZFC3H1(196441)	HeLa S3	Nuclear Extract	WT	none	2009-08-18
2331	BL8493	NARG1		HeLa S3	Nuclear Extract	WT	none	2009-08-18
2332	BL2779	SUV39H1	KIF23(9493), NCOR2(9612)	HeLa S3	Nuclear Extract	WT	none	2009-08-19
2333	BL2780	SUV39H1	MAP4(4134), NFKB1(4790), SF3B3(23450)	HeLa S3	Nuclear Extract	WT	none	2009-08-19
2334	BL8472	MADD	MDC1(9656), RBM26(64062)	HeLa S3	Nuclear Extract	WT	none	2009-08-19
2335	BL8473	MADD	CTTNBP2NL(55917), NUDT16L1(84309)	HeLa S3	Nuclear Extract	WT	none	2009-08-19
2336	BL8514	CKAP2	EML4(27436), KIAA1967(57805)	HeLa S3	Nuclear Extract	WT	none	2009-08-19
2337	BL8515	CKAP2	RUVBL1(8607)	HeLa S3	Nuclear Extract	WT	none	2009-08-19
2338	BL8516	CKAP2L	CEP97(79598), GOLGA1(2800)	HeLa S3	Nuclear Extract	WT	none	2009-08-19
2339	BL8517	CKAP2L	DDX21(9188), KIF14(9928), SMARCC2(6601)	HeLa S3	Nuclear Extract	WT	none	2009-08-19
2340	BL956	NF1	TBC1D15(64786)	HeLa S3	Nuclear Extract	WT	none	2009-08-19
2341	BL963	ROCK2	ACLY(47), HMMR(3161)	HeLa S3	Nuclear Extract	WT	none	2009-08-19
2342	BL964	ROCK2	DPYSL2(1808), IRF2BP1(26145)	HeLa S3	Nuclear Extract	WT	none	2009-08-19
2343	BL1118	SMC5	KDM1(23028)	HeLa S3	Nuclear Extract	WT	none	2009-08-19
2344	BL1145	LMO1	CNOT1(23019), ZNF295(49854)	HeLa S3	Nuclear Extract	WT	none	2009-08-19
2345	BL1437	PIM1	RAD18(56852)	HeLa S3	Nuclear Extract	WT	none	2009-08-19
2346	BL2687	ZBTB7A		HeLa S3	Nuclear Extract	WT	none	2009-08-19
2347	BL8333	C1orf55	HSPBAP1(79663), SMC1A(8243), SPTBN1(6711)	HeLa S3	Nuclear Extract	WT	none	2009-08-19
2349	BL2136	ROCK1	ECT2(1894), EED(8726), SUZ12(23512)	HeLa S3	Nuclear Extract	WT	none	2009-08-20
2350	BL2138	ROCK1	CORO1B(57175), SEPHS1(22929)	HeLa S3	Nuclear Extract	WT	none	2009-08-20
2351	BL4285	HGS		HeLa S3	Nuclear Extract	WT	none	2009-08-20
2352	BL4284	HGS	HUWE1(10075)	HeLa S3	Nuclear Extract	WT	none	2009-08-20
2353	BL1000	FANCI	WNK1(65125)	HeLa S3	Nuclear Extract	WT	none	2009-08-20
2354	BL2617	EIF2AK4	FNBP4(23360), KIAA0802(23255), RBM6(10180)	HeLa S3	Nuclear Extract	WT	none	2009-08-20
2355	BL999	FANCI	DOCK9(23348), SEC31A(22872)	HeLa S3	Nuclear Extract	WT	none	2009-08-20
2356	BL2685	ZBTB7A		HeLa S3	Nuclear Extract	WT	none	2009-08-20
2357	BL2467	SEC16A		HeLa S3	Nuclear Extract	WT	none	2009-08-20
2358	BL5038	CHD8	ELL2(22936), NCOR1(9611)	HeLa S3	Nuclear Extract	WT	none	2009-08-20
2363	BL1316	GSK3B		HeLa S3	Cytosolic	WT	none	2009-08-21
2364	BL5138	GSK3B	GBF1(8729), GOLGB1(2804)	HeLa S3	Cytosolic	WT	none	2009-08-21
2365	BL6415	BCR	TRIM3(10612)	HeLa S3	Cytosolic	WT	none	2009-08-21
2366	BL6417	BCR	ACACA(31)	HeLa S3	Cytosolic	WT	none	2009-08-21
2367	BL8287	TOR1AIP1	DAB2IP(153090), SERPINB4(6318)	HeLa S3	Cytosolic	WT	none	2009-08-21
2368	BL8288	TOR1AIP1	DLG5(9231), KIAA1217(56243)	HeLa S3	Cytosolic	WT	none	2009-08-21
2369	BL8524	CLASP2	GNPDA1(10007)	HeLa S3	Cytosolic	WT	none	2009-08-21
2370	BL8525	CLASP2	AHCYL1(10768), AHCYL2(23382)	HeLa S3	Cytosolic	WT	none	2009-08-21
2371	BL810	PRKAA2	ARHGEF7(8874), BCL9L(283149), INPPL1(3636)	HeLa S3	Cytosolic	WT	none	2009-08-21
2372	BL3172	MAVS		HeLa S3	Cytosolic	WT	none	2009-08-21
2373	BL3173	MAVS	SF3B3(23450)	HeLa S3	Cytosolic	WT	none	2009-08-21
2374	BL3661	CDCA7L	CHD2(1106), SYAP1(94056), ZNF326(284695)	HeLa S3	Cytosolic	WT	none	2009-08-21
2375	BL8568	MAP3K2	CUX1(1523), LRRC16A(55604)	HeLa S3	Cytosolic	WT	none	2009-08-21
2376	BL8570	MAP3K2	SRRM2(23524), USP24(23358)	HeLa S3	Cytosolic	WT	none	2009-08-21
2377	BL8578	MAP3K7IP1	KIF3A(11127), QKI(9444)	HeLa S3	Cytosolic	WT	none	2009-08-21
2378	BL8579	MAP3K7IP1	KLHL13(90293), NEDD1(121441), TUBGCP3(10426)	HeLa S3	Cytosolic	WT	none	2009-08-21
2379	BL5589	MYBL2		HeLa S3	Nuclear Extract	WT	none	2009-08-25
2380	BL5590	MYBL2		HeLa S3	Nuclear Extract	WT	none	2009-08-25
2381	BL6534	TRAF3IP1	CDC42BPB(9578), SEPT9(10801)	HeLa S3	Nuclear Extract	WT	none	2009-08-25
2382	BL7338	LRWD1		HeLa S3	Nuclear Extract	WT	none	2009-08-25
2383	BL7836	PDLIM7	CBL(867)	HeLa S3	Nuclear Extract	WT	none	2009-08-25
2384	BL7838	PDLIM7	DOCK7(85440), STAT3(6774)	HeLa S3	Nuclear Extract	WT	none	2009-08-25
2385	BL3259	HMGB3		HeLa S3	Nuclear Extract	WT	none	2009-08-25
2386	BL5039	CHD9	KCTD9(54793), TP53BP1(7158)	HeLa S3	Nuclear Extract	WT	none	2009-08-25
2387	BL5054	POLE3	BAZ1A(11177), YEATS2(55689)	HeLa S3	Nuclear Extract	WT	none	2009-08-25
2388	BL5062	POLH	KIF4A(24137), LIG1(3978)	HeLa S3	Nuclear Extract	WT	none	2009-08-25
2389	BL5668	KANK2		HeLa S3	Nuclear Extract	WT	none	2009-08-25
2390	BL6260	MBD4	ATM(472), FKBP15(23307), PPP1R12A(4659), SPATA5(166378)	HeLa S3	Nuclear Extract	WT	none	2009-08-25
2403	BL2030	RFWD2	DSP(1832), RUVBL2(10856)	HeLa S3	Cytosolic	WT	none	2009-08-28
2404	BL2031	RFWD2	DDX20(11218), GEMIN5(25929), PPP1R12A(4659), TACC3(10460)	HeLa S3	Cytosolic	WT	none	2009-08-28
2405	BL2032	RFWD2	CAPRIN1(4076), G3BP1(10146), NCOA6(23054)	HeLa S3	Cytosolic	WT	none	2009-08-28
2406	BL2505	PITX1	CYFIP1(23191)	HeLa S3	Cytosolic	WT	none	2009-08-28
2407	BL3347	ATN1		HeLa S3	Cytosolic	WT	none	2009-08-28
2408	BL3348	ATN1	WDR5(11091)	HeLa S3	Cytosolic	WT	none	2009-08-28
2409	BL3961	PES1	ATXN2L(11273), G3BP1(10146)	HeLa S3	Cytosolic	WT	none	2009-08-28
2410	BL894	PAFAH1B1	HIP1(3092)	HeLa S3	Cytosolic	WT	none	2009-08-28
2411	BL963	ROCK2	ACLY(47), HMMR(3161)	HeLa S3	Cytosolic	WT	none	2009-08-28
2412	BL964	ROCK2	DPYSL2(1808), IRF2BP1(26145)	HeLa S3	Cytosolic	WT	none	2009-08-28
2413	BL1145	LMO1	CNOT1(23019), ZNF295(49854)	HeLa S3	Cytosolic	WT	none	2009-08-28
2414	BL1437	PIM1	RAD18(56852)	HeLa S3	Cytosolic	WT	none	2009-08-28
2415	BL2136	ROCK1	ECT2(1894), EED(8726), SUZ12(23512)	HeLa S3	Cytosolic	WT	none	2009-08-28
2416	BL2138	ROCK1	CORO1B(57175), SEPHS1(22929)	HeLa S3	Cytosolic	WT	none	2009-08-28
2417	BL2617	EIF2AK4	FNBP4(23360), KIAA0802(23255), RBM6(10180)	HeLa S3	Cytosolic	WT	none	2009-08-28
2418	BL3964	PES1	BOP1(23246), DDX27(55661)	HeLa S3	Cytosolic	WT	none	2009-08-28
2420	BL5889	ENAH		HeLa S3	Cytosolic	WT	none	2009-09-01
2422	BL7836	PDLIM7	CBL(867)	HeLa S3	Cytosolic	WT	none	2009-09-01
2424	BL8333	C1orf55	HSPBAP1(79663), SMC1A(8243), SPTBN1(6711)	HeLa S3	Cytosolic	WT	none	2009-09-01
2425	BL8516	CKAP2L	CEP97(79598), GOLGA1(2800)	HeLa S3	Cytosolic	WT	none	2009-09-01
2426	BL8517	CKAP2L	DDX21(9188), KIF14(9928), SMARCC2(6601)	HeLa S3	Cytosolic	WT	none	2009-09-01
2429	BL5345	PTPN12		HeLa S3	Cytosolic	WT	none	2009-09-01
2431	BL6012	PHIP	NUP35(129401)	HeLa S3	Cytosolic	WT	none	2009-09-01
2432	BL7341	WDFY3	C17orf81(23587), C3orf75(54859), ELP4(26610)	HeLa S3	Cytosolic	WT	none	2009-09-01
2433	BL8332	C1orf55	CCDC88C(440193), HSPBAP1(79663), ZFC3H1(196441)	HeLa S3	Cytosolic	WT	none	2009-09-01
2434	BL8514	CKAP2	EML4(27436), KIAA1967(57805)	HeLa S3	Cytosolic	WT	none	2009-09-01
2435	BL699	DIDO1	CSE1L(1434), HIP1R(9026), REPS1(85021)	MCF7	Cytosolic	WT	none	2009-09-08
2436	BL1585	EGFR	BCAR3(8412), LSR(51599)	MCF7	Cytosolic	WT	none	2009-09-08
2437	BL2569	C17orf71		MCF7	Cytosolic	WT	none	2009-09-08
2438	BL2776	NF2	C9orf86(55684), PRDX4(10549), XRCC6(2547)	MCF7	Cytosolic	WT	none	2009-09-08
2439	BL2790	PTEN	NES(10763), RBM12(10137), RNF20(56254)	MCF7	Cytosolic	WT	none	2009-09-08
2440	BL2791	PTEN	DCTN1(1639), DOCK7(85440)	MCF7	Cytosolic	WT	none	2009-09-08
2441	BL6379	BCAR1	CEP97(79598)	MCF7	Cytosolic	WT	none	2009-09-08
2442	BL6398	BCAR3	RIF1(55183), SDSL(113675)	MCF7	Cytosolic	WT	none	2009-09-08
2443	CBC12	MAP3K1	PSME3(10197), SSH3(54961), TXLNA(200081)	MCF7	Cytosolic	WT	none	2009-09-08
2444	CBC542	CYLD	ROCK2(9475)	MCF7	Cytosolic	WT	none	2009-09-08
2445	CBC802		BHLHE40(8553), EVI5L(115704), NANS(54187)	MCF7	Cytosolic	WT	none	2009-09-08
2446	BL482	MAP3K7IP3	IPO5(3843), IRF2BP1(26145), ROCK2(9475)	MCF7	Cytosolic	WT	none	2009-09-08
2447	BL2204	STK3	AKAP6(9472), KIF11(3832), ROCK2(9475), STK4(6789)	MCF7	Cytosolic	WT	none	2009-09-08
2448	BL4031	BCAS2		MCF7	Cytosolic	WT	none	2009-09-08
2449	BL4957	ZNHIT3	GOLGA3(2802), MAP3K4(4216), RILPL1(353116)	MCF7	Cytosolic	WT	none	2009-09-08
2450	BL5892	MAP4K4	IRAK1(3654), MAP3K1(4214), TRIM33(51592), WRNIP1(56897)	MCF7	Cytosolic	WT	none	2009-09-08
2451	AB80	BRCA1	ANAPC1(64682)	HeLa S3	Nuclear Extract	WT	HU	2009-09-10
2452	AB81	BRCA1	RFX5(5993)	HeLa S3	Nuclear Extract	WT	HU	2009-09-10
2453	a-BARD1	BARD1	HOOK2(29911), NOS1AP(9722), SCRIB(23513)	HeLa S3	Nuclear Extract	WT	HU	2009-09-10
2454	BL373	TOPBP1	SFPQ(6421)	HeLa S3	Nuclear Extract	WT	HU	2009-09-10
2455	BL2791	PTEN	DCTN1(1639), DOCK7(85440)	HeLa S3	Nuclear Extract	WT	HU	2009-09-10
2456	BL2840	UIMC1		HeLa S3	Nuclear Extract	WT	HU	2009-09-10
2457	BL5398	FAM175B	PACS1(55690), WDHD1(11169)	HeLa S3	Nuclear Extract	WT	HU	2009-09-10
2458	BL7633	COBRA1	EDC4(23644), RDBP(7936), SUPV3L1(6832)	HeLa S3	Nuclear Extract	WT	HU	2009-09-10
2459	BL1107	CENPE	CORO1C(23603)	HeLa S3	Nuclear Extract	WT	none	2009-09-14
2460	BL1108	CENPE		HeLa S3	Nuclear Extract	WT	none	2009-09-14
2461	BL1112	CENPH		HeLa S3	Nuclear Extract	WT	none	2009-09-14
2462	BL1113	CENPH	BAIAP2L1(55971), MLL2(8085), UBXN7(26043)	HeLa S3	Nuclear Extract	WT	none	2009-09-14
2463	BL1114	CENPH	VPRBP(9730), ZNF318(24149)	HeLa S3	Nuclear Extract	WT	none	2009-09-14
2464	BL1115	CENPJ	CDC42BPB(9578), FKBP15(23307), IREB2(3658)	HeLa S3	Nuclear Extract	WT	none	2009-09-14
2465	BL1116	CENPJ	FAM175A(84142), PCYT1B(9468)	HeLa S3	Nuclear Extract	WT	none	2009-09-14
2466	BL1572	ITCH		HeLa S3	Nuclear Extract	WT	none	2009-09-14
2467	BL1577	ESCO1		HeLa S3	Nuclear Extract	WT	none	2009-09-14
2468	BL1744	CITED1	DNM1L(10059), EPS15(2060), HOOK3(84376)	HeLa S3	Nuclear Extract	WT	none	2009-09-14
2469	BL1745	CITED1	EML3(256364), RANBP9(10048), TSC2(7249)	HeLa S3	Nuclear Extract	WT	none	2009-09-14
2470	BL2238	KIAA1429	NEDD1(121441)	HeLa S3	Nuclear Extract	WT	none	2009-09-14
2471	BL2239	KIAA1429	ZBTB33(10009)	HeLa S3	Nuclear Extract	WT	none	2009-09-14
2472	BL2240	KIAA1429		HeLa S3	Nuclear Extract	WT	none	2009-09-14
2473	BL533	CCAR1	USO1(8615)	HeLa S3	Nuclear Extract	WT	none	2009-09-14
2474	JQ021	CCAR1	CAPRIN1(4076)	HeLa S3	Nuclear Extract	WT	none	2009-09-14
2475	CBC612	RNF20	ARFGEF2(10564), OTUD4(54726)	HeLa S3	Nuclear Extract	WT	none	2009-09-15
2476	BL169	TP53	TYMP(1890)	HeLa S3	Nuclear Extract	WT	none	2009-09-15
2477	BL313	SMC3		HeLa S3	Nuclear Extract	WT	none	2009-09-15
2478	BL700	DIDO1	EIF2AK4(440275), INPPL1(3636), RFX5(5993)	HeLa S3	Nuclear Extract	WT	none	2009-09-15
2479	BL1096	DYRK2		HeLa S3	Nuclear Extract	WT	none	2009-09-15
2480	BL1099	HIPK2		HeLa S3	Nuclear Extract	WT	none	2009-09-15
2481	BL1100	HIPK2	MVP(9961)	HeLa S3	Nuclear Extract	WT	none	2009-09-15
2482	BL1033	ADNP	ZFC3H1(196441)	HeLa S3	Nuclear Extract	WT	none	2009-09-15
2483	BL1546	DYRK2		HeLa S3	Nuclear Extract	WT	none	2009-09-15
2484	BL1547	DYRK2		HeLa S3	Nuclear Extract	WT	none	2009-09-15
2485	BL1777	C21orf7		HeLa S3	Nuclear Extract	WT	none	2009-09-15
2486	BL1778	C21orf7		HeLa S3	Nuclear Extract	WT	none	2009-09-15
2488	BL1780	C21orf7	MAP3K7IP1(10454), ZFYVE20(64145)	HeLa S3	Nuclear Extract	WT	none	2009-09-15
2489	BL1832	NIPBL	DDX3X(1654), SLC3A2(6520)	HeLa S3	Nuclear Extract	WT	none	2009-09-15
2490	BL2752	LCOR		HeLa S3	Nuclear Extract	WT	none	2009-09-17
2491	BL2753	LCOR	SHMT1(6470)	HeLa S3	Nuclear Extract	WT	none	2009-09-17
2492	BL2754	LCOR	CARD14(79092), GEMIN5(25929), NPEPL1(79716)	HeLa S3	Nuclear Extract	WT	none	2009-09-17
2493	BL2755	LCOR	ZFC3H1(196441)	HeLa S3	Nuclear Extract	WT	none	2009-09-17
2494	BL2762	HNRNPU	EDC3(80153), RFX5(5993)	HeLa S3	Nuclear Extract	WT	none	2009-09-17
2495	BL2763	HNRNPU		HeLa S3	Nuclear Extract	WT	none	2009-09-17
2496	BL2764	HNRNPU		HeLa S3	Nuclear Extract	WT	none	2009-09-17
2497	BL2786	PSMC5	MVP(9961)	HeLa S3	Nuclear Extract	WT	none	2009-09-17
2508	BL2738	ZNF335	SPATS2(65244)	HeLa S3	Nuclear Extract	WT	none	2009-09-17
2509	BL2768	PRMT2		HeLa S3	Nuclear Extract	WT	none	2009-09-17
2510	BL2769	PRMT2		HeLa S3	Nuclear Extract	WT	none	2009-09-17
2511	BL2792	TRIM24	KIF23(9493), TBK1(29110)	HeLa S3	Nuclear Extract	WT	none	2009-09-17
2512	BL2793	TRIM24	SHMT1(6470), SHMT2(6472)	HeLa S3	Nuclear Extract	WT	none	2009-09-17
2513	BL2837	UIMC1		HeLa S3	Nuclear Extract	WT	none	2009-09-17
2514	BL2838	UIMC1		HeLa S3	Nuclear Extract	WT	none	2009-09-17
2519	BL508	BRE	MRE11A(4361), TUBGCP3(10426)	HeLa S3	Nuclear Extract	WT	none	2009-09-22
2520	BL697	CC2D1A	BLM(641), CGGBP1(8545), KDM1(23028)	HeLa S3	Nuclear Extract	WT	none	2009-09-22
2522	BL759	BANP	ACOT7(11332), CIZ1(25792), FKBP15(23307), TP53BP1(7158)	HeLa S3	Nuclear Extract	WT	none	2009-09-22
2525	CBC622	ZNF687	DNMT1(1786), USP7(7874)	MCF7	Nuclear Extract	WT	none	2009-09-22
2526	CBC2031	ZMYND8	TBC1D5(9779)	MCF7	Nuclear Extract	WT	none	2009-09-22
2527	BL1053	N4BP2	SUPT6H(6830), TRIM24(8805), TRIM33(51592)	MCF7	Nuclear Extract	WT	none	2009-09-22
2528	BL2051	ESR1	CENPE(1062), SMEK1(55671), TBC1D4(9882)	MCF7	Nuclear Extract	WT	none	2009-09-22
2529	BL2053	ESR1	CDC42BPG(55561)	MCF7	Nuclear Extract	WT	none	2009-09-22
2530	BL2054	ESR1	HEATR5B(54497), UBR4(23352)	MCF7	Nuclear Extract	WT	none	2009-09-22
2531	BL475	AHCTF1		HeLa S3	Nuclear Extract	WT	none	2009-09-24
2532	BL595	APTX	KCTD18(130535), KHDRBS1(10657), ZBTB1(22890)	HeLa S3	Nuclear Extract	WT	none	2009-09-24
2533	BL596	APTX	AGAP3(116988), LIG3(3980)	HeLa S3	Nuclear Extract	WT	none	2009-09-24
2534	BL597	APTX	LRRC47(57470)	HeLa S3	Nuclear Extract	WT	none	2009-09-24
2535	BL757	BANP	ADD3(120)	HeLa S3	Nuclear Extract	WT	none	2009-09-24
2536	BL1002	ATF7IP		HeLa S3	Nuclear Extract	WT	none	2009-09-24
2537	BL1003	ATF7IP	CARD14(79092)	HeLa S3	Nuclear Extract	WT	none	2009-09-24
2538	BL1004	ATF7IP		HeLa S3	Nuclear Extract	WT	none	2009-09-24
2539	BL265	MCM7		HeLa S3	Nuclear Extract	WT	none	2009-09-24
2540	BL351	HELLS		HeLa S3	Nuclear Extract	WT	none	2009-09-24
2541	BL360	HLTF	FAF1(11124)	HeLa S3	Nuclear Extract	WT	none	2009-09-24
2546	BL754	CSNK2A1		HeLa S3	Nuclear Extract	WT	none	2009-09-24
2547	BL268	MCM8		HeLa S3	Nuclear Extract	WT	none	2009-09-24
2548	BL269	MCM8		HeLa S3	Nuclear Extract	WT	none	2009-09-24
2549	BL448	PPARGC1A	LIMCH1(22998)	HeLa S3	Nuclear Extract	WT	none	2009-09-24
2550	BL449	PPARGC1A	KDM1(23028)	HeLa S3	Nuclear Extract	WT	none	2009-09-24
2551	BL750	PELP1	TBC1D4(9882)	HeLa S3	Nuclear Extract	WT	none	2009-09-24
2555	BL326	RFX5		HeLa S3	Nuclear Extract	WT	none	2009-09-28
2556	BL327	RFXAP		HeLa S3	Nuclear Extract	WT	none	2009-09-28
2557	BL328	RFXANK		HeLa S3	Nuclear Extract	WT	none	2009-09-28
2558	BL405	RFC3		HeLa S3	Nuclear Extract	WT	none	2009-09-28
2559	BL406	RFC3	CSTF1(1477), CSTF2T(23283), NFIB(4781)	HeLa S3	Nuclear Extract	WT	none	2009-09-28
2560	BL713	NCOA6	CSTF3(1479)	HeLa S3	Nuclear Extract	WT	none	2009-09-28
2561	BL976	PLK1		HeLa S3	Nuclear Extract	WT	none	2009-09-28
2562	BL977	PLK1		HeLa S3	Nuclear Extract	WT	none	2009-09-28
2563	BL456	TCERG1		HeLa S3	Nuclear Extract	WT	none	2009-09-28
2564	BL457	TCERG1	SEC31A(22872), TSG101(7251), VPS37B(79720)	HeLa S3	Nuclear Extract	WT	none	2009-09-28
2565	BL458	TRIP4	TRIM33(51592)	HeLa S3	Nuclear Extract	WT	none	2009-09-28
2566	BL459	TRIP4	SMARCC2(6601), ZMYND8(23613)	HeLa S3	Nuclear Extract	WT	none	2009-09-28
2567	BL480	UBE3A		HeLa S3	Nuclear Extract	WT	none	2009-09-28
2568	BL1005	WAPAL	TPR(7175)	HeLa S3	Nuclear Extract	WT	none	2009-09-28
2570	BL1007	WAPAL	SEPT7(989)	HeLa S3	Nuclear Extract	WT	none	2009-09-28
2574	BL567			HeLa S3	Nuclear Extract	WT	none	2009-09-30
2575	BL780	MCM5		HeLa S3	Nuclear Extract	WT	none	2009-09-30
2576	BL978	PLK1		HeLa S3	Nuclear Extract	WT	none	2009-09-30
2577	BL994	MORC2		HeLa S3	Nuclear Extract	WT	none	2009-09-30
2578	BL1013	INTS3	PCF11(51585)	HeLa S3	Nuclear Extract	WT	none	2009-09-30
2579	BL1015	INTS6	CSNK2A1(1457), TRABD(80305)	HeLa S3	Nuclear Extract	WT	none	2009-09-30
2580	BL1017	INTS5	BAT3(7917)	HeLa S3	Nuclear Extract	WT	none	2009-09-30
2581	BL1018	INTS5	TCERG1(10915)	HeLa S3	Nuclear Extract	WT	none	2009-09-30
2582	BL2256	PRKRIR		HeLa S3	Nuclear Extract	WT	none	2009-10-01
2583	BL2257	PRKRIR		HeLa S3	Nuclear Extract	WT	none	2009-10-01
2584	BL2266	TDP1		HeLa S3	Nuclear Extract	WT	none	2009-10-01
2585	BL2267	TDP1	BEND3(57673)	HeLa S3	Nuclear Extract	WT	none	2009-10-01
2586	BL2268	TDP1	EML3(256364)	HeLa S3	Nuclear Extract	WT	none	2009-10-01
2587	BL2269	TDP1	CYFIP1(23191)	HeLa S3	Nuclear Extract	WT	none	2009-10-01
2588	BL2379	RFWD3	VAC14(55697)	HeLa S3	Nuclear Extract	WT	none	2009-10-01
2589	BL2380	RFWD3	INPPL1(3636)	HeLa S3	Nuclear Extract	WT	none	2009-10-01
2590	BL2253	PRKRIR		HeLa S3	Nuclear Extract	WT	none	2009-10-01
2591	BL2265	DOCK9	RFX7(64864)	HeLa S3	Nuclear Extract	WT	none	2009-10-01
2592	BL2295	EDC4	NAT10(55226), ROCK2(9475)	HeLa S3	Nuclear Extract	WT	none	2009-10-01
2593	BL2296	EDC4		HeLa S3	Nuclear Extract	WT	none	2009-10-01
2594	BL2397	DDB2	PRMT5(10419)	HeLa S3	Nuclear Extract	WT	none	2009-10-01
2595	BL2398	DDB2		HeLa S3	Nuclear Extract	WT	none	2009-10-01
2597	BL2400	DDB2		HeLa S3	Nuclear Extract	WT	none	2009-10-01
2606	BL1095	DYRK2		HeLa S3	Nuclear Extract	WT	none	2009-10-02
2607	BL1097	DYRK3		HeLa S3	Nuclear Extract	WT	none	2009-10-02
2608	BL1098	DYRK3	DNM2(1785)	HeLa S3	Nuclear Extract	WT	none	2009-10-02
2609	BL1165	TRIM24	MVP(9961)	HeLa S3	Nuclear Extract	WT	none	2009-10-02
2611	BL1340	DCLRE1C	CHTF18(63922), TRIM56(81844)	HeLa S3	Nuclear Extract	WT	none	2009-10-02
2612	BL1341	DCLRE1C		HeLa S3	Nuclear Extract	WT	none	2009-10-02
2613	BL2440	RBM9	ITPRIPL1(150771), NCOA5(57727), RP11-631M21.2(347688)	HeLa S3	Nuclear Extract	WT	none	2009-10-02
2614	BL1857	RBM14		HeLa S3	Nuclear Extract	WT	none	2009-10-05
2615	BL1865	FHL2		HeLa S3	Nuclear Extract	WT	none	2009-10-05
2616	BL1866	FHL2	LZTR1(8216)	HeLa S3	Nuclear Extract	WT	none	2009-10-05
2617	BL1996	DDB1		HeLa S3	Nuclear Extract	WT	none	2009-10-05
2618	BL1998	DDB1	SRI(6717)	HeLa S3	Nuclear Extract	WT	none	2009-10-05
2619	BL2013	AGAP3		HeLa S3	Nuclear Extract	WT	none	2009-10-05
2620	BL2014	AGAP3		HeLa S3	Nuclear Extract	WT	none	2009-10-05
2621	BL2016	AGAP3	CLIP1(6249), MDC1(9656), REPS1(85021)	HeLa S3	Nuclear Extract	WT	none	2009-10-05
2622	BL1020	FAM184B	CDC73(79577), KCTD3(51133), MAPK8IP3(23162), SHKBP1(92799)	HeLa S3	Nuclear Extract	WT	none	2009-10-06
2623	BL1028	INTS9	ISYNA1(51477)	HeLa S3	Nuclear Extract	WT	none	2009-10-06
2624	BL1038	RCOR1	MORC2(22880), TCOF1(6949)	HeLa S3	Nuclear Extract	WT	none	2009-10-06
2625	BL1424	FOXO1	KIAA1598(57698), NCOR1(9611)	HeLa S3	Nuclear Extract	WT	none	2009-10-06
2626	BL1425	FOXO1	SEPT9(10801)	HeLa S3	Nuclear Extract	WT	none	2009-10-06
2627	BL1550	HIPK2	ARHGAP17(55114), ATF7IP(55729), NUP153(9972)	HeLa S3	Nuclear Extract	WT	none	2009-10-06
2628	BL1551	HIPK2	KIFC1(3833), SETDB1(9869)	HeLa S3	Nuclear Extract	WT	none	2009-10-06
2629	BL1569	TRIM21	PACS1(55690)	HeLa S3	Nuclear Extract	WT	none	2009-10-06
2630	BL1024	INTS8		HeLa S3	Nuclear Extract	WT	none	2009-10-06
2631	BL1025	INTS7	DAPK3(1613), MRE11A(4361), RAD50(10111), TPR(7175)	HeLa S3	Nuclear Extract	WT	none	2009-10-06
2632	BL1758	CTBP1		HeLa S3	Nuclear Extract	WT	none	2009-10-06
2633	BL1759	CTBP1	ERC1(23085)	HeLa S3	Nuclear Extract	WT	none	2009-10-06
2634	BL1795	BCL11A	INPPL1(3636), WDR91(29062)	HeLa S3	Nuclear Extract	WT	none	2009-10-06
2635	BL1802	MTA1	CABIN1(23523), KIF23(9493)	HeLa S3	Nuclear Extract	WT	none	2009-10-06
2636	BL1804	MTA1		HeLa S3	Nuclear Extract	WT	none	2009-10-06
2637	BL1806	MTA1	KIF23(9493), SEPT9(10801)	HeLa S3	Nuclear Extract	WT	none	2009-10-06
2647	BL554	TRIM28		HeLa S3	Nuclear Extract	WT	none	2009-10-07
2648	BL640	TCERG1	NACC1(112939)	HeLa S3	Nuclear Extract	WT	none	2009-10-07
2649	BL663	RFC3		HeLa S3	Nuclear Extract	WT	none	2009-10-07
2651	BL756	CSNK2A2		HeLa S3	Nuclear Extract	WT	none	2009-10-07
2652	BL1570	TRIM21	BAIAP2L1(55971), VCP(7415)	HeLa S3	Nuclear Extract	WT	none	2009-10-07
2653	BL2228	FIGNL1	COL4A3BP(10087)	HeLa S3	Nuclear Extract	WT	none	2009-10-07
2654	BL2230	FIGNL1	CAPRIN1(4076), NIPBL(25836)	HeLa S3	Nuclear Extract	WT	none	2009-10-07
2655	EPI-2602-1	COPS3	GPS1(2873)	HeLa S3	Nuclear Extract	WT	none	2009-09-28
2656	EPI-2593-1	RUNX1		HeLa S3	Nuclear Extract	WT	none	2009-09-28
2657	EPI-2603-1	PTTG1	PACSIN2(11252), PTTG2(10744), VPS45(11311), ZFYVE20(64145)	HeLa S3	Nuclear Extract	WT	none	2009-09-28
2658	NB106A	BIN1	TRIM25(7706)	HeLa S3	Nuclear Extract	WT	none	2009-09-28
2659	a-HCV4		SPATA5(166378), TBC1D15(64786), XRCC6(2547)	HeLa S3	Nuclear Extract	WT	none	2009-09-28
2660	a-HCV5		FAM40A(85369), RFX7(64864), UROC1(131669)	HeLa S3	Nuclear Extract	WT	none	2009-09-28
2662	a-HCV10		C1orf25(81627), KIAA1712(80817), RAPH1(65059)	HeLa S3	Nuclear Extract	WT	none	2009-09-28
2663	BL9238	GREB1	SEPT9(10801), WDR62(284403)	MCF7	Nuclear Extract	WT	none	2009-10-09
2664	BL9239	GREB1	ARMC8(25852), RANBP9(10048)	MCF7	Nuclear Extract	WT	none	2009-10-09
2665	BL9240	GREB1	DDX5(1655), DIDO1(11083), SH3GL1(6455)	MCF7	Nuclear Extract	WT	none	2009-10-09
2666	BL9241	GREB1		MCF7	Nuclear Extract	WT	none	2009-10-09
2667	SC-48809	RFX1		MCF7	Nuclear Extract	WT	none	2009-10-09
2676	BL1008	FKBP15		HeLa S3	Cytosolic	WT	none	2009-10-09
2677	BL1009	FKBP15	ATF7IP(55729), CC2D1A(54862)	HeLa S3	Cytosolic	WT	none	2009-10-09
2678	BL1010	FKBP15		HeLa S3	Cytosolic	WT	none	2009-10-09
2679	BL1042	AGAP1	KIFC1(3833)	HeLa S3	Cytosolic	WT	none	2009-10-09
2680	BL1167	MCPH1		HeLa S3	Cytosolic	WT	none	2009-10-09
2681	BL1168	MCPH1		HeLa S3	Cytosolic	WT	none	2009-10-09
2682	BL2228	FIGNL1	COL4A3BP(10087)	HeLa S3	Cytosolic	WT	none	2009-10-09
2683	BL2230	FIGNL1	CAPRIN1(4076), NIPBL(25836)	HeLa S3	Cytosolic	WT	none	2009-10-09
2693	BL1824	TAOK3	CORO7(79585), HECTD3(79654)	HeLa S3	Cytosolic	WT	none	2009-10-12
2694	BL1825	TAOK3	EML3(256364), EWSR1(2130), TRIOBP(11078)	HeLa S3	Cytosolic	WT	none	2009-10-12
2695	BL1827	RCN1	SPAG5(10615)	HeLa S3	Cytosolic	WT	none	2009-10-12
2696	BL1859	TRIP6		HeLa S3	Cytosolic	WT	none	2009-10-12
2697	BL2970	ASZ1	AKAP8L(26993), ALPI(248)	HeLa S3	Cytosolic	WT	none	2009-10-12
2698	BL1880	NIPBL		HeLa S3	Nuclear Extract	WT	none	2009-10-08
2699	BL1881	NIPBL		HeLa S3	Nuclear Extract	WT	none	2009-10-08
2700	BL1050	C11orf30	HIP1(3092), PCCA(5095)	MCF7	Nuclear Extract	WT	4HT	2009-10-19
2701	BL1801	BCL11B	C11orf30(56946), TMF1(7110)	MCF7	Nuclear Extract	WT	4HT	2009-10-19
2702	CBC2032	ZMYND8		MCF7	Nuclear Extract	WT	4HT	2009-10-19
2703	BL2608	HDAC1		MCF7	Nuclear Extract	WT	4HT	2009-10-19
2704	BL3837	KDM5A		MCF7	Nuclear Extract	WT	4HT	2009-10-19
2705	BL4670	PPP2R5D	TP53BP1(7158)	MCF7	Nuclear Extract	WT	4HT	2009-10-19
2706	BL6318	PHF12	ARID3A(1820), NCOA3(8202)	MCF7	Nuclear Extract	WT	4HT	2009-10-19
2707	BL7535	NOTCH1	C11orf30(56946), TFG(10342), TP53BP2(7159)	MCF7	Nuclear Extract	WT	4HT	2009-10-19
2708	BL677	LEO1	RANBP2(5903)	HeLa S3	Nuclear Extract	WT	none	2009-10-20
2709	BL749	PELP1	DYNC1H1(1778), MDC1(9656), SEC16A(9919)	HeLa S3	Nuclear Extract	WT	none	2009-10-20
2710	BL1011	ZHX1		HeLa S3	Nuclear Extract	WT	none	2009-10-20
2711	BL1051	N4BP2	WDHD1(11169)	HeLa S3	Nuclear Extract	WT	none	2009-10-20
2712	BL2136	ROCK1	ECT2(1894), EED(8726), SUZ12(23512)	HeLa S3	Nuclear Extract	WT	none	2009-10-20
2713	BL2150	TPR		HeLa S3	Nuclear Extract	WT	none	2009-10-20
2714	BL4224	BPTF	PAF1(54623), TPR(7175)	HeLa S3	Nuclear Extract	WT	none	2009-10-20
2715	BL308	SMC1A		HeLa S3	Nuclear Extract	WT	none	2009-10-20
2717	JQ007	MSH6	INTS1(26173)	HeLa S3	Nuclear Extract	WT	HU	2009-10-21
2718	BL531	MCM10		HeLa S3	Nuclear Extract	WT	HU	2009-10-21
2719	BL735	TERF2IP		HeLa S3	Nuclear Extract	WT	HU	2009-10-21
2720	BL2094	MSH2	CAD(790)	HeLa S3	Nuclear Extract	WT	HU	2009-10-21
2721	BL2507	TLK1	ETF1(2107)	HeLa S3	Nuclear Extract	WT	HU	2009-10-21
2722	BL2512	TLK2		HeLa S3	Nuclear Extract	WT	HU	2009-10-21
2723	BL3509	KDM4A	GARS(2617)	HeLa S3	Nuclear Extract	WT	HU	2009-10-21
2724	BL6649	GRB10	CUX1(1523), ZCCHC6(79670)	HeLa S3	Nuclear Extract	WT	HU	2009-10-21
2740	BL320	BRCA2	EP400(57634), GIGYF2(26058), RUVBL2(10856)	HeLa S3	Nuclear Extract	WT	none	2009-10-27
2741	SC-583	CREBBP		HeLa S3	Nuclear Extract	WT	none	2009-10-27
2743	SC-954	CDC2	CDC2L1(984), ZMYM4(9202)	HeLa S3	Nuclear Extract	WT	none	2009-10-27
2748	SC-163	CDK2		HeLa S3	Nuclear Extract	WT	none	2009-10-27
2752	BL756	CSNK2A2		HeLa S3	Nuclear Extract	WT	none	2009-10-27
2777	EPI-1958-1	KCNJ11	CDC23(8697), KIF2A(3796)	HeLa S3	Nuclear Extract	WT	none	2009-10-30
2782	EPI-2298-1	BRAF	TLK2(11011)	HeLa S3	Nuclear Extract	WT	none	2009-10-30
2784	EPI-2367-1	AMPH	RDBP(7936), SEC31A(22872)	HeLa S3	Nuclear Extract	WT	none	2009-10-30
2787	EPI-2516-1	VTCN1	PDIA6(10130)	HeLa S3	Nuclear Extract	WT	none	2009-10-30
2832	EPI-2589-1	RPA1		HeLa S3	Cytosolic	WT	none	2009-11-10
2836	EPI-1490-1	CDC25C		HeLa S3	Nuclear Extract	WT	none	2009-11-16
2837	EPI-1650-1	MAP2K4		HeLa S3	Nuclear Extract	WT	none	2009-11-16
2838	EPI-1664-1	MALT1		HeLa S3	Nuclear Extract	WT	none	2009-11-16
2839	EPI-1970-1	MAP1LC3A		HeLa S3	Nuclear Extract	WT	none	2009-11-16
2840	EPI-2269-1	USO1		HeLa S3	Nuclear Extract	WT	none	2009-11-16
2841	EPI-2298-1	BRAF	TLK2(11011)	HeLa S3	Nuclear Extract	WT	none	2009-11-16
2842	EPI-2341-1	CDK4	PPIL1(51645)	HeLa S3	Nuclear Extract	WT	none	2009-11-16
2843	EPI-2424-1	SUFU	C14orf4(64207)	HeLa S3	Nuclear Extract	WT	none	2009-11-16
2844	BL756	CSNK2A2		HeLa S3	Nuclear Extract	WT	none	2009-11-16
2845	SC-163	CDK2		HeLa S3	Nuclear Extract	WT	none	2009-11-16
2846	SC-583	CREBBP		HeLa S3	Nuclear Extract	WT	none	2009-11-16
2847	SC-954	CDC2	CDC2L1(984), ZMYM4(9202)	HeLa S3	Nuclear Extract	WT	none	2009-11-16
2848	EPI-1236-1	MAP2K2		HeLa S3	Nuclear Extract	WT	none	2009-11-16
2849	EPI-1614-1	HDAC4		HeLa S3	Nuclear Extract	WT	none	2009-11-16
2850	EPI-1615-1	CHUK		HeLa S3	Nuclear Extract	WT	none	2009-11-16
2852	SC-48847	BRE		HeLa S3	Nuclear Extract	WT	HU	2009-11-17
2853	SC-48847	BRE		HeLa S3	Nuclear Pellet	WT	HU	2009-11-17
2854	SC-48849	BRE		HeLa S3	Nuclear Extract	WT	HU	2009-11-17
2855	SC-48849	BRE		HeLa S3	Nuclear Pellet	WT	HU	2009-11-17
2856	EPI-1114-1	EGFR	UHRF1BP1(54887), WRNIP1(56897)	HeLa S3	Cytosolic	WT	none	2009-11-17
2857	EPI-1480-1	PTK2B	HOMEZ(57594), PPFIA1(8500)	HeLa S3	Cytosolic	WT	none	2009-11-17
2859	EPI-1616-1	ABL1	TLK2(11011)	HeLa S3	Cytosolic	WT	none	2009-11-17
2860	EPI-1625-1	ITK	CALU(813)	HeLa S3	Cytosolic	WT	none	2009-11-17
2861	EPI-2367-1	AMPH	RDBP(7936), SEC31A(22872)	HeLa S3	Cytosolic	WT	none	2009-11-17
2862	EPI-2046-1	CTNNA2		HeLa S3	Cytosolic	WT	none	2009-11-17
2863	EPI-2418-1	KIF22		HeLa S3	Cytosolic	WT	none	2009-11-17
2866	EPI-1615-1	CHUK		HeLa S3	Cytosolic	WT	none	2009-11-17
2867	EPI-1640-1	MAP2K6		HeLa S3	Cytosolic	WT	none	2009-11-17
2868	EPI-1650-1	MAP2K4		HeLa S3	Cytosolic	WT	none	2009-11-17
2869	EPI-1664-1	MALT1		HeLa S3	Cytosolic	WT	none	2009-11-17
2871	SC-9019	PTK2B	TXLNA(200081)	HeLa S3	Cytosolic	WT	none	2009-11-17
2872	NB120-3333	PSME3	MIA3(375056)	HeLa S3	Cytosolic	WT	none	2009-10-27
2873	NB120-3333	PSME3	MIA3(375056)	HeLa S3	Nuclear Extract	wt	none	2009-10-27
2879	BL2790	PTEN	NES(10763), RBM12(10137), RNF20(56254)	HeLa S3	Nuclear Extract	WT	HU	2009-11-19
2880	BL2790	PTEN	NES(10763), RBM12(10137), RNF20(56254)	HeLa S3	Nuclear Pellet	WT	HU	2009-11-19
2881	BL2791	PTEN	DCTN1(1639), DOCK7(85440)	HeLa S3	Nuclear Extract	WT	HU	2009-11-19
2882	BL2791	PTEN	DCTN1(1639), DOCK7(85440)	HeLa S3	Nuclear Pellet	WT	HU	2009-11-19
2883	BL3967	USP3	DIDO1(11083), NDE1(54820)	HeLa S3	Nuclear Extract	WT	none	2009-11-18
2884	BL4054	USP33	ATM(472), HMBOX1(79618)	HeLa S3	Nuclear Extract	WT	none	2009-11-18
2885	BL4146	USP36	DNM2(1785)	HeLa S3	Nuclear Extract	WT	none	2009-11-18
2887	BL4152	USP37	C12orf10(60314)	HeLa S3	Nuclear Extract	WT	none	2009-11-18
2888	BL6024	WDR4	FKBP15(23307), METTL1(4234)	HeLa S3	Nuclear Extract	WT	none	2009-11-18
2889	BL6033	WDR42A	NCOA3(8202)	HeLa S3	Nuclear Extract	WT	none	2009-11-18
2890	BL4048	USP32	UBR5(51366)	HeLa S3	Nuclear Extract	WT	none	2009-11-18
2891	BL4144	USP35		HeLa S3	Nuclear Extract	WT	none	2009-11-18
2892	BL4184	USP16		HeLa S3	Nuclear Extract	WT	none	2009-11-18
2893	BL4974	USP20		HeLa S3	Nuclear Extract	WT	none	2009-11-18
2894	BL4978	USP48		HeLa S3	Nuclear Extract	WT	none	2009-11-18
2895	BL6028	WDR20	PPAT(5471), TLE3(7090), TRIM26(7726)	HeLa S3	Nuclear Extract	WT	none	2009-11-18
2896	BL6185	USP1	EDC4(23644), EPPK1(83481)	HeLa S3	Nuclear Extract	WT	none	2009-11-18
2897	BL7583	WDR21A		HeLa S3	Nuclear Extract	WT	none	2009-11-18
2898	BL6836	NUP188	MACF1(23499)	HeLa S3	Nuclear Extract	WT	none	2009-11-23
2899	BL7534	NOTCH1	MOCOS(55034)	HeLa S3	Nuclear Extract	WT	none	2009-11-23
2900	BL7746	OBFC2A	FAM120B(84498)	HeLa S3	Nuclear Extract	WT	none	2009-11-23
2901	BL8292	NOTCH2	UBR5(51366)	HeLa S3	Nuclear Extract	WT	none	2009-11-23
2903	BL8369	NFYA		HeLa S3	Nuclear Extract	WT	none	2009-11-23
2904	BL8376	NFYC	HSPD1(3329), KIAA1967(57805)	HeLa S3	Nuclear Extract	WT	none	2009-11-23
2905	BL4917	TRIM16	TRIM16L(147166)	HeLa S3	Nuclear Extract	WT	none	2009-11-23
2906	BL4928	TRIM37		HeLa S3	Nuclear Extract	WT	none	2009-11-23
2907	BL5783	WDR44		HeLa S3	Nuclear Extract	WT	none	2009-11-23
[truncated: 1,291 more rows]

## Sheet: Antibodies
Antibody	Intended Antigen Gene ID	Antigen Gene Symbol
ab70171	7917	BAT3
ab81302	126353	C19orf21
ab92734	9867	PJA2
MTMR3	8897	MTMR3
RET	5979	RET
ab_M_YW	55159	RFWD3
ab_N_YW	55159	RFWD3
SATB1 mouse	6304	SATB1
TIF2	10499	NCOA2
a-PARC	23113	CUL9
BL57	3070	HELLS
BL73	63967	CLSPN
BL117	545	ATR
BL119	545	ATR
BL129	2956	MSH6
BL130	2956	MSH6
BL131	2956	MSH6
BL132	2956	MSH6
BL167	7157	TP53
BL169	7157	TP53
BL170	7157	TP53
BL172	4193	MDM2
BL173	4193	MDM2
BL175	4193	MDM2
BL235	1111	CHEK1
BL237	5884	RAD17
BL239	5884	RAD17
BL262	4175	MCM6
BL265	4176	MCM7
BL268	84515	MCM8
BL269	84515	MCM8
BL274	5981	RFC1
BL275	5982	RFC2
BL282	5984	RFC4
BL285	5985	RFC5
BL294	23248	RPRD2
BL308	8243	SMC1A
BL313	9126	SMC3
BL320	675	BRCA2
BL322	4292	MLH1
BL323	4436	MSH2
BL324	5395	PMS2
BL325	10499	NCOA2
BL326	5993	RFX5
BL327	5994	RFXAP
BL328	8625	RFXANK
BL330	993	CDC25A
BL333	6790	AURKA
BL342	4221	MEN1
BL351	3070	HELLS
BL360	6596	HLTF
BL373	11073	TOPBP1
BL391	5885	RAD21
BL404	5883	RAD9A
BL405	5983	RFC3
BL406	5983	RFC3
BL409	5976	UPF1
BL434	8648	NCOA1
BL435	8648	NCOA1
BL436	10499	NCOA2
BL437	10499	NCOA2
BL438	8202	NCOA3
BL439	8202	NCOA3
BL440	1387	CREBBP
BL441	1387	CREBBP
BL442	2033	EP300
BL443	2033	EP300
BL444	8204	NRIP1
BL446	7337	UBE3A
BL448	10891	PPARGC1A
BL449	10891	PPARGC1A
BL453	7205	TRIP6
BL456	10915	TCERG1
BL457	10915	TCERG1
BL458	9325	TRIP4
BL459	9325	TRIP4
BL460	10432	RBM14
BL461	10432	RBM14
BL462	9584	RBM39
BL463	9584	RBM39
BL464	23382	AHCYL2
BL465	23382	AHCYL2
BL469	6790	AURKA
BL475	25909	AHCTF1
BL476	25909	AHCTF1
BL480	7337	UBE3A
BL482	257397	MAP3K7IP3
BL508	9577	BRE
BL511	10298	PAK4
BL521	54583	EGLN1
BL531	55388	MCM10
BL533	55749	CCAR1
BL540	9869	SETDB1
BL551	10592	SMC2
BL552	3014	H2AFX
BL553	10155	TRIM28
BL554	10155	TRIM28
BL555	10155	TRIM28
BL561	9318	COPS2
BL562	9318	COPS2
BL567
BL580	9656	MDC1
BL586	2237	FEN1
BL587	2237	FEN1
BL588	25898	RCHY1
BL595	54840	APTX
BL596	54840	APTX
BL597	54840	APTX
BL616	23113	CUL9
BL625	23369	PUM2
BL640	10915	TCERG1
BL653	9820	CUL7
BL663	5983	RFC3
BL664	5983	RFC3
BL665	1820	ARID3A
BL666	57448	BIRC6
BL667	57448	BIRC6
BL668	57448	BIRC6
BL671	10075	HUWE1
BL674	54623	PAF1
BL677	123169	LEO1
BL695	54862	CC2D1A
BL697	54862	CC2D1A
BL698	11083	DIDO1
BL699	11083	DIDO1
BL700	11083	DIDO1
BL701	29110	TBK1
BL702	29110	TBK1
BL703	29110	TBK1
BL713	23054	NCOA6
BL735	54386	TERF2IP
BL746	9043	SPAG9
BL749	27043	PELP1
BL750	27043	PELP1
BL751	27043	PELP1
BL754	1457	CSNK2A1
BL755	1459	CSNK2A2
BL756	1459	CSNK2A2
BL757	54971	BANP
BL758	54971	BANP
BL759	54971	BANP
BL773	11277	TREX1
BL780	4174	MCM5
BL798	5728	PTEN
BL809	5562	PRKAA1
BL810	5563	PRKAA2
BL821	64318	NOC3L
BL825	6596	HLTF
BL835	9757	MLL4
BL840	7319	UBE2A
BL843	25865	PRKD2
BL844	25865	PRKD2
BL860	1464	CSPG4
BL861	1464	CSPG4
BL863	6768	ST14
BL866	5829	PXN
BL867	9070	ASH2L
BL892	641	BLM
BL894	5048	PAFAH1B1
BL896	1981	EIF4G1
BL897	2475	MTOR
BL900	25900	IFFO1
BL901	25900	IFFO1
BL906	7161	TP73
BL921	6362	CCL18
BL922	23113	CUL9
BL938	6667	SP1
BL940	5431	POLR2B
BL956	4763	NF1
BL958	79915	ATAD5
BL961	1786	DNMT1
BL963	9475	ROCK2
BL964	9475	ROCK2
BL969	7226	TRPM2
BL970	7226	TRPM2
BL973	11284	PNKP
BL974	11284	PNKP
BL975	11284	PNKP
BL976	5347	PLK1
BL977	5347	PLK1
BL978	5347	PLK1
BL988	23244	PDS5A
BL989	23244	PDS5A
BL990	3619	INCENP
BL991	3619	INCENP
BL992	3619	INCENP
BL993	22880	MORC2
BL994	22880	MORC2
BL996	26173	INTS1
BL999	55215	FANCI
BL1000	55215	FANCI
BL1002	55729	ATF7IP
BL1003	55729	ATF7IP
BL1004	55729	ATF7IP
BL1005	23063	WAPAL
BL1007	23063	WAPAL
BL1008	23307	FKBP15
BL1009	23307	FKBP15
BL1010	23307	FKBP15
BL1011	11244	ZHX1
BL1012	11244	ZHX1
BL1013	65123	INTS3
BL1014	65123	INTS3
BL1015	26512	INTS6
BL1016	26512	INTS6
BL1017	80789	INTS5
BL1018	80789	INTS5
BL1019	80789	INTS5
BL1020	27146	FAM184B
BL1021	27146	FAM184B
BL1022	27146	FAM184B
BL1023	55656	INTS8
BL1024	55656	INTS8
BL1025	25896	INTS7
BL1026	25896	INTS7
BL1027	55756	INTS9
BL1028	55756	INTS9
BL1031	9203	ZMYM3
BL1032	9203	ZMYM3
BL1033	23394	ADNP
BL1034	23394	ADNP
BL1035	23028	KDM1
BL1036	23028	KDM1
BL1037	23028	KDM1
BL1038	23186	RCOR1
BL1039	23186	RCOR1
BL1040	9444	QKI
BL1041	9444	QKI
BL1042	116987	AGAP1
BL1045	27	ABL2
BL1049	56946	C11orf30
BL1050	56946	C11orf30
BL1051	55728	N4BP2
BL1052	55728	N4BP2
BL1053	55728	N4BP2
BL1073	9212	AURKB
BL1074	9212	AURKB
BL1075	9212	AURKB
BL1095	8445	DYRK2
BL1096	8445	DYRK2
BL1097	8444	DYRK3
BL1098	8444	DYRK3
BL1099	28996	HIPK2
BL1100	28996	HIPK2
BL1103	1059	CENPB
BL1104	1059	CENPB
BL1105	1060	CENPC1
BL1106	1060	CENPC1
BL1107	1062	CENPE
BL1108	1062	CENPE
BL1109	1063	CENPF
BL1110	1063	CENPF
BL1111	1063	CENPF
BL1112	64946	CENPH
BL1113	64946	CENPH
BL1114	64946	CENPH
BL1115	55835	CENPJ
BL1116	55835	CENPJ
BL1118	23137	SMC5
BL1121	79677	SMC6
BL1123	10193	RNF41
BL1124	10193	RNF41
BL1145	4004	LMO1
BL1152	558	AXL
BL1154	7301	TYRO3
BL1163	79753	SNIP1
BL1164	79753	SNIP1
BL1165	8805	TRIM24
BL1166	8805	TRIM24
BL1167	79648	MCPH1
BL1168	79648	MCPH1
BL1193	9739	SETD1A
BL1213	6795	AURKC
BL1214	6795	AURKC
BL1231	10902	BRD8
BL1232	10902	BRD8
BL1238	9794	MAML1
BL1239	9794	MAML1
BL1242	84441	MAML2
BL1244	55534	MAML3
BL1245	55534	MAML3
BL1258	4194	MDM4
BL1285	9070	ASH2L
BL1296	3667	IRS1
BL1297	3667	IRS1
BL1304	23064	SETX
BL1308	7486	WRN
BL1309	7486	WRN
BL1316	2932	GSK3B
BL1326	2309	FOXO3
BL1327	2309	FOXO3
BL1340	64421	DCLRE1C
BL1341	64421	DCLRE1C
BL1352	2521	FUS
BL1353	2521	FUS
BL1354	2521	FUS
BL1355	2521	FUS
BL1356	8148	TAF15
BL1408	4297	MLL
BL1424	2308	FOXO1
BL1425	2308	FOXO1
BL1426	2308	FOXO1
BL1437	5292	PIM1
BL1460	4085	MAD2L1
BL1461	4085	MAD2L1
BL1462	4085	MAD2L1
BL1475	11284	PNKP
BL1476	11284	PNKP
BL1477	11284	PNKP
BL1484	64223	MLST8
BL1485	64223	MLST8
BL1490	25836	NIPBL
BL1491	25836	NIPBL
BL1492	25836	NIPBL
BL1493	25836	NIPBL
BL1519	23070	FTSJD2
BL1520	23070	FTSJD2
BL1536	11277	TREX1
BL1544	7272	TTK
BL1545	7272	TTK
BL1546	8445	DYRK2
BL1547	8445	DYRK2
BL1550	28996	HIPK2
BL1551	28996	HIPK2
BL1569	6737	TRIM21
BL1570	6737	TRIM21
BL1571	83737	ITCH
BL1572	83737	ITCH
BL1573	23097	CDC2L6
BL1574	23097	CDC2L6
BL1575	23097	CDC2L6
BL1576	114799	ESCO1
BL1577	114799	ESCO1
BL1578	84515	MCM8
BL1581	1877	E4F1
BL1582	1877	E4F1
BL1585	1956	EGFR
BL1586	1956	EGFR
BL1601	7248	TSC1
BL1656	23049	SMG1
BL1657	23049	SMG1
BL1664	71950
BL1681	699	BUB1
BL1682	699	BUB1
BL1683	699	BUB1
BL1684	9184	BUB3
BL1685	9184	BUB3
BL1686	9184	BUB3
BL1687	9184	BUB3
BL1688	8379	MAD1L1
BL1689	8379	MAD1L1
BL1690	8379	MAD1L1
BL1691	8379	MAD1L1
BL1704	11331	PHB2
BL1705	11331	PHB2
BL1706	11331	PHB2
BL1707	11331	PHB2
BL1730	23013	SPEN
BL1731	23013	SPEN
BL1732	23013	SPEN
BL1733	23013	SPEN
BL1734	79718	TBL1XR1
BL1736	10498	CARM1
BL1737	10498	CARM1
BL1738	10498	CARM1
BL1739	10498	CARM1
BL1740	1022	CDK7
BL1741	1022	CDK7
BL1742	1022	CDK7
BL1743	1022	CDK7
BL1744	4435	CITED1
BL1745	4435	CITED1
BL1751	9282	MED14
BL1752	9282	MED14
BL1753	9282	MED14
BL1754	9439	MED23
BL1755	9439	MED23
BL1756	9439	MED23
BL1757	9439	MED23
BL1758	1487	CTBP1
BL1759	1487	CTBP1
BL1760	1487	CTBP1
BL1761	1487	CTBP1
BL1774	6793	STK10
BL1776	6793	STK10
BL1777	56911	C21orf7
BL1778	56911	C21orf7
BL1780	56911	C21orf7
BL1789	22976	PAXIP1
BL1794	53335	BCL11A
BL1795	53335	BCL11A
BL1796	53335	BCL11A
BL1797	53335	BCL11A
BL1798	64919	BCL11B
BL1799	64919	BCL11B
BL1800	64919	BCL11B
BL1801	64919	BCL11B
BL1802	9112	MTA1
BL1803	9112	MTA1
BL1804	9112	MTA1
BL1805	9112	MTA1
BL1806	9112	MTA1
BL1819	3661	IRF3
BL1820	3661	IRF3
BL1821	3661	IRF3
BL1822	3661	IRF3
BL1823	51347	TAOK3
BL1824	51347	TAOK3
BL1825	51347	TAOK3
BL1826	51347	TAOK3
BL1827	5954	RCN1
BL1828	5954	RCN1
BL1832	25836	NIPBL
BL1834	814	CAMK4
BL1835	814	CAMK4
BL1836	814	CAMK4
BL1846	3476	IGBP1
BL1854	10432	RBM14
BL1855	10432	RBM14
BL1856	10432	RBM14
BL1857	10432	RBM14
BL1858	7205	TRIP6
BL1859	7205	TRIP6
BL1860	7205	TRIP6
BL1861	8204	NRIP1
BL1862	8204	NRIP1
BL1865	2274	FHL2
BL1866	2274	FHL2
BL1867	9325	TRIP4
BL1868	9325	TRIP4
BL1869	9325	TRIP4
BL1870	9325	TRIP4
BL1871	23054	NCOA6
BL1872	23054	NCOA6
BL1873	23054	NCOA6
BL1874	23054	NCOA6
BL1880	25836	NIPBL
BL1881	25836	NIPBL
BL1882	54541	DDIT4
BL1914	5932	RBBP8
BL1915	9748	SLK
BL1921	57805	KIAA1967
BL1931	5514	PPP1R10
BL1936	23381	SMG5
BL1944	9887	SMG7
BL1966	5902	RANBP1
BL1975	1434	CSE1L
BL1996	1642	DDB1
BL1998	1642	DDB1
BL1999	1642	DDB1
BL2000	55183	RIF1
BL2001	55183	RIF1
BL2003	55183	RIF1
BL2013	116988	AGAP3
BL2014	116988	AGAP3
BL2016	116988	AGAP3
BL2030	64326	RFWD2
BL2031	64326	RFWD2
BL2032	64326	RFWD2
BL2041	22803	XRN2
BL2045	54464	XRN1
BL2051	2099	ESR1
BL2053	2099	ESR1
BL2054	2099	ESR1
BL2063	8065	CUL5
BL2074	5965	RECQL
BL2079	9400	RECQL5
BL2094	4436	MSH2
BL2097	9111	NMI
BL2099	9111	NMI
BL2118	84148	MYST1
BL2120	84148	MYST1
BL2125	8841	HDAC3
BL2126	8841	HDAC3
BL2127	8841	HDAC3
BL2128	8841	HDAC3
BL2129	64783	RBM15
BL2130	64783	RBM15
BL2131	64783	RBM15
BL2132	64783	RBM15
BL2133	23648	SSBP3
BL2136	6093	ROCK1
BL2138	6093	ROCK1
BL2145	92610	TIFA
BL2147	701	BUB1B
BL2148	7175	TPR
BL2149	7175	TPR
BL2150	7175	TPR
BL2151	7175	TPR
BL2152	140609	NEK7
BL2153	140609	NEK7
BL2154	140609	NEK7
BL2155	9736	USP34
BL2156	9736	USP34
BL2157	9736	USP34
BL2158	9736	USP34
BL2164	208	AKT2
BL2178	253260	RICTOR
BL2182	7249	TSC2
BL2185	7249	TSC2
BL2193	7375	USP4
BL2194	7375	USP4
BL2195	7375	USP4
BL2196	7375	USP4
BL2204	6788	STK3
BL2210	9113	LATS1
BL2212	9113	LATS1
BL2213	26524	LATS2
BL2217	84343	HPS3
BL2218	84343	HPS3
BL2219	84343	HPS3
BL2220	84343	HPS3
BL2221	10087	COL4A3BP
BL2222	10087	COL4A3BP
BL2223	10087	COL4A3BP
BL2224	10087	COL4A3BP
BL2225	1432	MAPK14
BL2226	1432	MAPK14
BL2227	63979	FIGNL1
BL2228	63979	FIGNL1
BL2229	63979	FIGNL1
BL2230	63979	FIGNL1
BL2238	25962	KIAA1429
BL2239	25962	KIAA1429
BL2240	25962	KIAA1429
BL2241	8021	NUP214
BL2242	8021	NUP214
BL2243	8021	NUP214
BL2249	11234	HPS5
BL2250	11234	HPS5
BL2251	11234	HPS5
BL2252	11234	HPS5
BL2253	5612	PRKRIR
BL2254	5612	PRKRIR
BL2255	5612	PRKRIR
BL2256	5612	PRKRIR
BL2257	5612	PRKRIR
BL2262	23348	DOCK9
BL2263	23348	DOCK9
BL2264	23348	DOCK9
BL2265	23348	DOCK9
BL2266	55775	TDP1
BL2267	55775	TDP1
BL2268	55775	TDP1
BL2269	55775	TDP1
BL2270	6938	TCF12
BL2271	6938	TCF12
BL2272	6938	TCF12
BL2273	6938	TCF12
BL2275	23608	MKRN1
BL2285	23091	ZC3H13
BL2286	23091	ZC3H13
BL2287	23091	ZC3H13
BL2289	84464	BTBD12
BL2290	84464	BTBD12
BL2291	84464	BTBD12
BL2292	84464	BTBD12
BL2293	23644	EDC4
BL2294	23644	EDC4
BL2295	23644	EDC4
BL2296	23644	EDC4
BL2298	11269	DDX19B
BL2310	4300	MLLT3
BL2311	4300	MLLT3
BL2313	4300	MLLT3
BL2317	55755	CDK5RAP2
BL2356	4291	MLF1
BL2365	9847	KIAA0528
BL2366	9847	KIAA0528
BL2367	9847	KIAA0528
BL2368	9847	KIAA0528
BL2370	6850	SYK
BL2371	6850	SYK
BL2373	3636	INPPL1
BL2377	55159	RFWD3
BL2378	55159	RFWD3
BL2379	55159	RFWD3
BL2380	55159	RFWD3
BL2381	57551	TAOK1
BL2382	57551	TAOK1
BL2383	57551	TAOK1
BL2384	2072	ERCC4
BL2385	2072	ERCC4
BL2386	2072	ERCC4
BL2388	8451	CUL4A
BL2389	8451	CUL4A
BL2390	8451	CUL4A
BL2391	8451	CUL4A
BL2393	81620	CDT1
BL2394	81620	CDT1
BL2397	1643	DDB2
BL2398	1643	DDB2
BL2400	1643	DDB2
BL2413	149041	RC3H1
BL2416	149041	RC3H1
BL2417	9898	UBAP2L
BL2418	9898	UBAP2L
BL2420	170506	DHX36
BL2429	8031	NCOA4
BL2430	8031	NCOA4
BL2431	57727	NCOA5
BL2432	57727	NCOA5
BL2433	9039	UBA3
BL2434	9039	UBA3
BL2435	5469	MED1
BL2436	5469	MED1
BL2437	80324	PUS1
BL2438	80324	PUS1
BL2439	23543	RBM9
BL2440	23543	RBM9
BL2441	6047	RNF4
BL2442	6047	RNF4
BL2443	6129	RPL7
BL2444	6129	RPL7
BL2445	6294	SAFB
BL2446	6294	SAFB
BL2447	6597	SMARCA4
BL2448	6597	SMARCA4
BL2449	6605	SMARCE1
BL2450	6605	SMARCE1
BL2451	7041	TGFB1I1
BL2452	7041	TGFB1I1
BL2453	23414	ZFPM2
BL2454	23414	ZFPM2
BL2455	57658	CALCOCO1
BL2457	7332	UBE2L3
BL2458	7332	UBE2L3
BL2459	10521	DDX17
BL2460	10521	DDX17
BL2461	1655	DDX5
BL2462	1655	DDX5
BL2463	96764	TGS1
BL2464	96764	TGS1
BL2465	135112	NCOA7
BL2466	135112	NCOA7
BL2467	9919	SEC16A
BL2485	7484	WNT9B
BL2492	84875	PARP10
BL2498	84444	DOT1L
BL2500	84444	DOT1L
BL2502	5978	REST
BL2505	5307	PITX1
BL2507	9874	TLK1
BL2512	11011	TLK2
BL2519	7415	VCP
BL2533	79991	OBFC1
BL2546	10664	CTCF
BL2547	10664	CTCF
BL2555	29128	UHRF1
BL2569	55181	C17orf71
BL2581	57521	RPTOR
BL2583	9611	NCOR1
BL2586	9612	NCOR2
BL2587	9612	NCOR2
BL2588	9612	NCOR2
BL2590	8850	KAT2B
BL2591	6130	RPL7A
BL2593	6130	RPL7A
BL2594	9063	PIAS2
BL2595	9063	PIAS2
BL2596	9063	PIAS2
BL2600	83990	BRIP1
BL2601	9862	MED24
BL2602	9862	MED24
BL2603	9862	MED24
BL2604	133522	PPARGC1B
BL2605	133522	PPARGC1B
BL2606	133522	PPARGC1B
BL2607	3065	HDAC1
BL2608	3065	HDAC1
BL2617	440275	EIF2AK4
BL2640	7014	TERF2
BL2666	3066	HDAC2
BL2667	3066	HDAC2
BL2670	2187	FANCB
BL2671	2187	FANCB
BL2679	23239	PHLPP1
BL2683	23035	PHLPP2
BL2685	51341	ZBTB7A
BL2687	51341	ZBTB7A
BL2693	3276	PRMT1
BL2695	3276	PRMT1
BL2700	8428	STK24
BL2703	51765	RP6-213H19.1
BL2709	2177	FANCD2
BL2712	2178	FANCE
BL2725	51282	SCAND1
BL2726	51282	SCAND1
BL2727	51282	SCAND1
BL2728	25942	SIN3A
BL2729	25942	SIN3A
BL2730	25942	SIN3A
BL2731	25942	SIN3A
BL2734	10011	SRA1
BL2735	10011	SRA1
BL2737	63925	ZNF335
BL2738	63925	ZNF335
BL2739	63925	ZNF335
BL2745	10438	C1D
BL2746	10438	C1D
BL2747	10438	C1D
BL2748	22938	SNW1
BL2749	22938	SNW1
BL2750	22938	SNW1
BL2751	22938	SNW1
BL2752	84458	LCOR
BL2753	84458	LCOR
BL2754	84458	LCOR
BL2755	84458	LCOR
BL2756	1382	CRABP2
BL2757	1382	CRABP2
BL2758	9440	MED17
BL2759	9440	MED17
BL2760	9440	MED17
BL2761	9440	MED17
BL2762	3192	HNRNPU
BL2763	3192	HNRNPU
BL2764	3192	HNRNPU
BL2765	3192	HNRNPU
BL2766	3275	PRMT2
BL2767	3275	PRMT2
BL2768	3275	PRMT2
BL2769	3275	PRMT2
BL2776	4771	NF2
BL2777	4771	NF2
BL2779	6839	SUV39H1
BL2780	6839	SUV39H1
BL2784	11315	PARK7
BL2785	5705	PSMC5
BL2786	5705	PSMC5
BL2787	5705	PSMC5
BL2788	5728	PTEN
BL2789	5728	PTEN
BL2790	5728	PTEN
BL2791	5728	PTEN
BL2792	8805	TRIM24
BL2793	8805	TRIM24
BL2794	8805	TRIM24
BL2795	8805	TRIM24
BL2796	51192	CKLF
BL2797	51192	CKLF
BL2798	8900	CCNA1
BL2799	8900	CCNA1
BL2800	8900	CCNA1
BL2801	8900	CCNA1
BL2805	51366	UBR5
BL2837	51720	UIMC1
BL2838	51720	UIMC1
BL2839	51720	UIMC1
BL2840	51720	UIMC1
BL2841	9968	MED12
BL2842	9968	MED12
BL2843	9968	MED12
BL2844	9968	MED12
BL2845	9442	MED27
BL2846	9442	MED27
BL2847	9442	MED27
BL2848	80306	MED28
BL2849	80306	MED28
BL2850	80306	MED28
BL2851	54797	MED18
BL2852	54797	MED18
BL2853	54797	MED18
BL2854	54797	MED18
BL2856	26354	GNL3
BL2881	11200	CHEK2
BL2882	11200	CHEK2
BL2920	8877	SPHK1
BL2928	8553	BHLHE40
BL2970	136991	ASZ1
BL2986	5928	RBBP4
BL2989	5931	RBBP7
BL2994	200186	CRTC2
BL2995	200186	CRTC2
BL3004	1662	DDX10
BL3007	80010	RMI1
BL3015	8886	DDX18
BL3028	121504	HIST4H4
BL3029	121504	HIST4H4
BL3030	2064	ERBB2
BL3032	2064	ERBB2
BL3033	2064	ERBB2
BL3038	2066	ERBB4
BL3041	2066	ERBB4
BL3057	261726	TIPRL
BL3061	23352	UBR4
BL3066	8493	PPM1D
BL3069	11218	DDX20
BL3106	324	APC
BL3114	9989	PPP4R1
BL3118	151987	PPP4R2
BL3121	55671	SMEK1
BL3131	5516	PPP2CB
BL3169	9700	ESPL1
BL3172	57506	MAVS
BL3173	57506	MAVS
BL3194	1045	CDX2
BL3195	1045	CDX2
BL3196	22933	SIRT2
BL3199	22933	SIRT2
BL3200	23411	SIRT1
BL3203	23411	SIRT1
BL3234	55661	DDX27
BL3238	55794	DDX28
BL3241	54505	DHX29
BL3250	64794	DDX31
BL3256	56478	EIF4ENIF1
BL3259	3149	HMGB3
BL3263	79840	NHEJ1
BL3282	221927	C7orf27
BL3283	221927	C7orf27
BL3314	9810	RNF40
BL3342	7813	EVI5
BL3347	1822	ATN1
BL3348	1822	ATN1
BL3388	1869	E2F1
BL3390	1869	E2F1
BL3413	5893	RAD52
BL3415	5893	RAD52
BL3431	23373	CRTC1
BL3434	23373	CRTC1
BL3439	79003	MIS12
BL3443	10403	NDC80
BL3453	11130	ZWINT
BL3461	25936	NSL1
BL3463	57082	CASC5
BL3467	6830	SUPT6H
BL3498	3717	JAK2
BL3509	9682	KDM4A
BL3513	9682	KDM4A
BL3555	6829	SUPT5H
BL3564	80279	CDK5RAP3
BL3571	5537	PPP6C
BL3588	8350	HIST1H3A
BL3591	8350	HIST1H3A
BL3600	7159	TP53BP2
BL3602	7159	TP53BP2
BL3609	4150	MAZ
BL3622	151636	DTX3L
BL3624	151636	DTX3L
BL3627	55818	KDM3A
BL3628	55818	KDM3A
BL3631	22992	KDM2A
BL3632	22992	KDM2A
BL3655	11168	PSIP1
BL3661	55536	CDCA7L
BL3688	10419	PRMT5
BL3693	9787	DLGAP5
BL3695	9787	DLGAP5
BL3720	23030	KDM4B
BL3721	23030	KDM4B
BL3734	8535	CBX4
BL3742	23466	CBX6
BL3752	57332	CBX8
BL3800	79728	PALB2
BL3816	57103	C12orf5
BL3821	51780	KDM3B
BL3822	221037	JMJD1C
BL3837	5927	KDM5A
BL3841	10765	KDM5B
BL3893	5883	RAD9A
BL3907	57646	USP28
BL3918	5499	PPP1CA
BL3923	5531	PPP4C
BL3924	5530	PPP3CA
BL3927	5530	PPP3CA
BL3936	5536	PPP5C
BL3942	8974	P4HA2
BL3961	23481	PES1
BL3964	23481	PES1
BL3967	9960	USP3
BL3969	8078	USP5
BL3977	9100	USP10
BL3987	9097	USP14
BL4004	9958	USP15
BL4014	54828	BCAS3
BL4015	23368	PPP1R13B
BL4031	10286	BCAS2
BL4036	11151	CORO1A
BL4037	11151	CORO1A
BL4048	84669	USP32
BL4054	23032	USP33
BL4071	80895	ILKAP
BL4073	80895	ILKAP
BL4102	55170	PRMT6
BL4144	57558	USP35
BL4146	57602	USP36
BL4148	57602	USP36
BL4152	57695	USP37
BL4155	84640	USP38
BL4165	51514	DTL
BL4168	51514	DTL
BL4172	55857	NCRNA00153
BL4184	10600	USP16
BL4187	10869	USP19
BL4189	10869	USP19
BL4198	23358	USP24
BL4209	6924	TCEB3
BL4214	9967	THRAP3
BL4224	2186	BPTF
BL4237	5518	PPP2R1A
BL4249	5521	PPP2R2B
BL4267	28227	PPP2R3B
BL4268	28227	PPP2R3B
BL4273	54962	TIPIN
BL4277	8914	TIMELESS
BL4284	9146	HGS
BL4285	9146	HGS
BL4287	5525	PPP2R5A
BL4310	9701	SAPS2
BL4319	23243	ANKRD28
BL4336	9320	TRIP12
BL4341	6433	SFRS8
BL4374	10914	PAPOLA
BL4381	4678	NASP
BL4386	10916	MAGED2
BL4396	10565	ARFGEF1
BL4398	10564	ARFGEF2
BL4408	10914	PAPOLA
BL4419	157769	FAM91A1
BL4422	9406	ZRANB2
BL4457	26574	AATF
BL4460	26574	AATF
BL4464	9859	CEP170
BL4485	8242	KDM5C
BL4488	8242	KDM5C
BL4494	8467	SMARCA5
BL4505	56916	SMARCAD1
BL4506	56916	SMARCAD1
BL4507	56916	SMARCAD1
BL4508	56916	SMARCAD1
BL4516	546	ATRX
BL4520	6594	SMARCA1
BL4540	50485	SMARCAL1
BL4543	57492	ARID1B
BL4545	10362	HMG20B
BL4546	10362	HMG20B
BL4547	10362	HMG20B
BL4548	10362	HMG20B
BL4553	51592	TRIM33
BL4554	25814	ATXN10
BL4557	25814	ATXN10
BL4565	23095	KIF1B
BL4577	55031	USP47
BL4578	9044	BTAF1
BL4588	8208	CHAF1B
BL4597	51428	DDX41
BL4607	9667	SAFB2
BL4625	51634	RBMX2
BL4650	3835	KIF22
BL4651	3835	KIF22
BL4659	5781	PTPN11
BL4670	5528	PPP2R5D
BL4675	10926	DBF4
BL4677	10926	DBF4
BL4711	27250	PDCD4
BL4726	6310	ATXN1
BL4731	6311	ATXN2
BL4761	1739	DLG1
BL4773	2475	MTOR
BL4774	2475	MTOR
BL4782	84335	AKT1S1
BL4783	84335	AKT1S1
BL4793	7508	XPC
BL4797	23214	XPO6
BL4805	10277	UBE4B
BL4808	8295	TRRAP
BL4827	9857	CEP350
BL4839	11169	WDHD1
BL4857	23152	CIC
BL4869	5108	PCM1
BL4874	80204	FBXO11
BL4891	991	CDC20
BL4893	991	CDC20
BL4901	9150	CTDP1
BL4905	8725	C19orf2
BL4907	10923	SUB1
BL4911	5371	PML
BL4912	5371	PML
BL4914	10626	TRIM16
BL4917	10626	TRIM16
BL4923	23650	TRIM29
BL4927	4591	TRIM37
BL4928	4591	TRIM37
BL4934	91107	TRIM47
BL4935	91107	TRIM47
BL4938	81844	TRIM56
BL4941	10612	TRIM3
BL4945	9322	TRIP10
BL4950	9324	HMGN3
BL4952	9324	HMGN3
BL4953	9321	TRIP11
BL4957	9326	ZNHIT3
BL4960	10006	ABI1
BL4961	10006	ABI1
BL4974	10868	USP20
BL4978	84196	USP48
BL4982	10181	RBM5
BL4994	84549	MAK16
BL5008	64062	RBM26
BL5013	54439	RBM27
BL5015	23029	RBM34
BL5018	23029	RBM34
BL5021	1105	CHD1
BL5022	1105	CHD1
BL5026	1107	CHD3
BL5030	84181	CHD6
BL5032	55636	CHD7
BL5036	57680	CHD8
BL5038	57680	CHD8
BL5039	80205	CHD9
BL5046	23649	POLA2
BL5049	10714	POLD3
BL5054	54107	POLE3
BL5061	5429	POLH
BL5062	5429	POLH
BL5074	55215	FANCI
BL5104	2972	BRF1
BL5105	2972	BRF1
BL5113	5170	PDPK1
BL5117	3611	ILK
BL5118	5058	PAK1
BL5123	5062	PAK2
BL5138	2932	GSK3B
BL5157	151246	SGOL2
BL5166	1029	CDKN2A
BL5196	55722	CEP72
BL5201	6091	ROBO1
BL5202	6091	ROBO1
BL5212	55619	DOCK10
BL5214	55619	DOCK10
BL5230	6873	TAF2
BL5231	6873	TAF2
BL5254	83860	TAF3
BL5259	6878	TAF6
BL5271	10210	TOPORS
BL5295	84159	ARID5B
BL5312	3150	HMGN1
BL5315	11201	POLI
BL5316	11201	POLI
BL5324	11221	DUSP10
BL5338	26472	PPP1R14B
BL5344	5782	PTPN12
BL5345	5782	PTPN12
BL5346	5782	PTPN12
BL5361	54434	SSH1
BL5398	23172	FAM175B
BL5415	90957	DHX57
BL5418	9231	DLG5
BL5423	2071	ERCC3
BL5424	2071	ERCC3
BL5428	2072	ERCC4
BL5431	2073	ERCC5
BL5432	2073	ERCC5
BL5433	2074	ERCC6
BL5439	25929	GEMIN5
BL5445	9569	GTF2IRD1
BL5475	23774	BRD1
BL5480	8019	BRD3
BL5491	5887	RAD23B
BL5495	56852	RAD18
BL5499	8614	STC2
BL5502	10013	HDAC6
BL5503	10013	HDAC6
BL5506	55075	UACA
BL5507	51564	HDAC7
BL5515	64855	FAM129B
BL5519	5116	PCNT
BL5529	54908	CCDC99
BL5549	7913	DEK
BL5554	221830	TWISTNB
BL5558	10043	TOM1
BL5576	11064	CEP110
BL5589	4605	MYBL2
BL5590	4605	MYBL2
BL5618	1616	DAXX
BL5619	1616	DAXX
BL5621	8165	AKAP1
BL5622	8165	AKAP1
BL5624	11217	AKAP2
BL5626	11217	AKAP2
BL5634	9590	AKAP12
BL5638	11214	AKAP13
BL5646	54467	ANKIB1
BL5655	124401	ANKS3
BL5657	55139	ANKZF1
BL5659	55139	ANKZF1
BL5668	25959	KANK2
BL5670	25959	KANK2
BL5675	22852	ANKRD26
BL5687	65124	ANKRD57
BL5689	65124	ANKRD57
BL5697	116985	ARAP1
BL5700	142678	MIB2
BL5711	22994	AZI1
BL5721	91603	ZNF830
BL5722	91603	ZNF830
BL5726	1676	DFFA
BL5747	2288	FKBP4
BL5752	2289	FKBP5
BL5754	161882	ZFPM1
BL5763	8660	IRS2
BL5772	10413	YAP1
BL5777	9589	WTAP
BL5778	85456	TNKS1BP1
BL5783	54521	WDR44
BL5784	54521	WDR44
BL5786	55135	WRAP53
BL5800	83903	GSG2
BL5826	23594	ORC6L
BL5829	84295	PHF6
BL5834	57650	KIAA1524
BL5844	196441	ZFC3H1
BL5845	79780	CCDC82
BL5855	83461	CDCA3
BL5856	83461	CDCA3
BL5883	25792	CIZ1
BL5889	55740	ENAH
BL5892	9448	MAP4K4
BL5895	9448	MAP4K4
BL5899	51199	NIN
BL5901	153562	MARVELD2
BL5902	153562	MARVELD2
BL5906	4798	NFRKB
BL5913	64710	NUCKS1
BL5930	10615	SPAG5
BL5941	65125	WNK1
BL5947	223082	ZNRF2
BL5963	5894	RAF1
BL5966	8498	RANBP3
BL5973	9877	ZC3H11A
BL5978	64397	ZFP106
BL5987	24149	ZNF318
BL5990	9640	ZNF592
BL5993	27332	ZNF638
BL5995	27332	ZNF638
BL5999	2305	FOXM1
BL6011	55023	PHIP
BL6012	55023	PHIP
BL6014	51096	UTP18
BL6024	10785	WDR4
BL6028	91833	WDR20
BL6033	50717	WDR42A
BL6040	23160	WDR43
BL6044	9277	WDR46
BL6046	284403	WDR62
BL6059	29062	WDR91
BL6076	898	CCNE1
BL6077	56339	METTL3
BL6090	80012	PHC3
BL6096	4343	MOV10
BL6112	7403	KDM6A
BL6116	80152	CENPT
BL6127	9943	OXSR1
BL6158	25957	SFRS18
BL6174	55775	TDP1
BL6185	7398	USP1
BL6193	9994	CASP8AP2
BL6197	2063	NR2F6
BL6198	2063	NR2F6
BL6202	2101	ESRRA
BL6227	57326	PBXIP1
BL6228	57326	PBXIP1
BL6238	55809	TRERF1
BL6259	8930	MBD4
BL6260	8930	MBD4
BL6290	80184	CEP290
BL6305	27343	POLL
BL6306	27343	POLL
BL6311	8178	ELL
BL6318	57649	PHF12
BL6322	2810	SFN
BL6323	25	ABL1
BL6324	25	ABL1
BL6339	26057	ANKRD17
BL6340	26057	ANKRD17
BL6346	1386	ATF2
BL6350	11016	ATF7
BL6370	8850	KAT2B
BL6379	9564	BCAR1
BL6380	9564	BCAR1
BL6388	1385	CREB1
BL6392	5576	PRKAR2A
BL6398	8412	BCAR3
BL6410	54880	BCOR
BL6413	54880	BCOR
BL6415	613	BCR
BL6417	613	BCR
BL6423	892	CCNC
BL6425	902	CCNH
BL6436	81669	CCNL2
BL6439	81669	CCNL2
BL6443	905	CCNT2
BL6476	29904	EEF2K
BL6486	2077	ERF
BL6487	2077	ERF
BL6494	157570	ESCO2
BL6497	2122	EVI1
BL6498	2122	EVI1
BL6501	5747	PTK2
BL6503	5747	PTK2
BL6507	23219	FBXO28
BL6510	81545	FBXO38
BL6517	648	BMI1
BL6523	1874	E2F4
BL6524	673	BRAF
BL6534	26146	TRAF3IP1
BL6535	26146	TRAF3IP1
BL6548	10743	RAI1
BL6564	689	BTF3
BL6566	9735	KNTC1
BL6579	6657	SOX2
BL6582	8650	NUMB
BL6583	8650	NUMB
BL6591	9253	NUMBL
BL6598	55294	FBXW7
BL6599	55294	FBXW7
BL6604	10602	CDC42EP3
BL6616	11135	CDC42EP1
BL6624	2303	FOXC2
BL6632	221937	FOXK1
BL6636	3607	FOXK2
BL6638	2794	GNL1
BL6644	58513	EPS15L1
BL6647	2060	EPS15
BL6649	2887	GRB10
BL6657	2909	GRLF1
BL6680	80854	SETD7
BL6687	55870	ASH1L
BL6688	55870	ASH1L
BL6690	8284	KDM5D
BL6691	8284	KDM5D
BL6694	7404	UTY
BL6695	7404	UTY
BL6699	8667	EIF3H
BL6754	23133	PHF8
BL6755	23133	PHF8
BL6780	25836	NIPBL
BL6794	7507	XPA
BL6804	10762	NUP50
BL6836	23511	NUP188
BL6840	3267	AGFG1
BL6854	22916	NCBP2
BL6869	55125	CEP192
BL6872	7840	ALMS1
BL6881	95681	TSGA14
BL6899	79959	CEP76
BL6912	22995	CEP152
BL6925	11116	FGFR1OP
BL6983	9923	ZBTB40
BL6987	55596	ZCCHC8
BL6995	84936	ZFYVE19
BL6997	7586	ZKSCAN1
BL6998	7586	ZKSCAN1
BL7002	9202	ZMYM4
BL7007	64763	ZNF574
BL7008	79724	ZNF768
BL7009	79724	ZNF768
BL7015	7554	ZNF8
BL7029	7535	ZAP70
BL7037	4790	NFKB1
BL7041	4791	NFKB2
BL7051	5970	RELA
BL7055	5966	REL
BL7062	1147	CHUK
BL7063	1147	CHUK
BL7067	3551	IKBKB
BL7075	4793	NFKBIB
BL7111	23314	SATB2
BL7116	23077	MYCBP2
BL7129	115098	CCDC124
BL7137	25901	CCDC28A
BL7142	124808	CCDC43
BL7153	55510	DDX43
BL7163	23234	DNAJC9
BL7174	27327	TNRC6A
BL7201	64787	EPS8L2
BL7207	116113	FOXP4
BL7222	10985	GCN1L1
BL7226	26091	HERC4
BL7235	4214	MAP3K1
BL7244	375449	MAST4
BL7252	27030	MLH3
BL7270	29982	NRBF2
BL7271	29982	NRBF2
BL7304	7706	TRIM25
BL7338	222229	LRWD1
BL7340	222229	LRWD1
BL7341	23001	WDFY3
BL7352	55100	WDR70
BL7356	112840	WDR89
BL7379	7353	UFD1L
BL7394	1017	CDK2
BL7408	23144	ZC3H3
BL7432	284695	ZNF326
BL7442	51193	ZNF639
BL7446	27153	ZNF777
BL7472	11047	ADRM1
BL7477	63922	CHTF18
BL7502	9730	VPRBP
BL7507	6654	SOS1
BL7513	4998	ORC1L
BL7526	6655	SOS2
BL7534	4851	NOTCH1
BL7535	4851	NOTCH1
BL7536	8411	EEA1
BL7546	50943	FOXP3
BL7552	23405	DICER1
BL7553	23405	DICER1
BL7558	5976	UPF1
BL7566	8924	HERC2
BL7583	26094	WDR21A
BL7613	55827	IQWD1
BL7623	27436	EML4
BL7633	25920	COBRA1
BL7647	6885	MAP3K7
BL7649	11184	MAP4K1
BL7655	6936	C2orf3
BL7656	6936	C2orf3
BL7683	29102	RNASEN
BL7700	9411	ARHGAP29
BL7711	2059	EPS8
BL7720	9181	ARHGEF2
BL7740	8812	CCNK
BL7746	64859	OBFC2A
BL7759	10257	ABCC4
BL7766	5595	MAPK3
BL7800	9459	ARHGEF6
BL7814	9826	ARHGEF11
BL7836	9260	PDLIM7
BL7838	9260	PDLIM7
BL7841	23365	ARHGEF12
BL7844	27237	ARHGEF16
BL7864	2889	RAPGEF1
BL7865	2889	RAPGEF1
BL7869	9693	RAPGEF2
BL7872	51735	RAPGEF6
BL7874	51735	RAPGEF6
BL7901	51426	POLK
BL7902	51426	POLK
BL7903	79447	C16orf53
BL7949	5296	PIK3R2
BL7968	51776	ZAK
BL7980	7405	UVRAG
BL7981	7405	UVRAG
BL7984	23457	ABCB9
BL7986	5825	ABCD3
BL8037	6502	SKP2
BL8090	8575	PRKRA
BL8103	6464	SHC1
BL8104	27245	AHDC1
BL8105	27245	AHDC1
BL8106	27245	AHDC1
BL8107	27245	AHDC1
BL8108	23132	RAD54L2
BL8109	23132	RAD54L2
BL8110	23132	RAD54L2
BL8111	23132	RAD54L2
BL8118	27336	HTATSF1
BL8125	1969	EPHA2
BL8149	6494	SIPA1
BL8187	55074	OXR1
BL8209	57050	UTP3
BL8216	57661	PHRF1
BL8224	55252	ASXL2
BL8229	79596	RNF219
BL8230	7156	TOP3A
BL8231	7156	TOP3A
BL8232	7156	TOP3A
BL8233	7156	TOP3A
BL8235	7917	BAT3
BL8252	79832	QSER1
BL8261	9360	PPIG
BL8262	9360	PPIG
BL8271	9525	VPS4B
BL8287	26092	TOR1AIP1
BL8288	26092	TOR1AIP1
BL8292	4853	NOTCH2
BL8293	4853	NOTCH2
BL8297	23332	CLASP1
BL8308	23613	ZMYND8
BL8312	5074	PAWR
BL8315	152137	CCDC50
BL8325	79080	CCDC86
BL8332	163859	C1orf55
BL8333	163859	C1orf55
BL8346	80728	KIAA1688
BL8369	4800	NFYA
BL8376	4802	NFYC
BL8402	22930	RAB3GAP1
BL8409	50807	ASAP1
BL8428	23256	SCFD1
BL8445	5604	MAP2K1
BL8472	8567	MADD
BL8473	8567	MADD
BL8482	22848	AAK1
BL8483	22848	AAK1
BL8493	80155	NARG1
BL8507	23246	BOP1
BL8514	26586	CKAP2
BL8515	26586	CKAP2
BL8516	150468	CKAP2L
BL8517	150468	CKAP2L
BL8524	23122	CLASP2
BL8525	23122	CLASP2
BL8546	9149	DYRK1B
BL8550	3708	ITPR1
BL8551	3708	ITPR1
BL8561	23271	CAMSAP1L1
BL8568	10746	MAP3K2
BL8570	10746	MAP3K2
BL8578	10454	MAP3K7IP1
BL8579	10454	MAP3K7IP1
BL8602	23139	MAST2
BL8633	84930	MASTL
BL8639	50488	MINK1
BL8641	50488	MINK1
BL8654	56647	BCCIP
BL8669	4302	MLLT6
BL8672	4301	MLLT4
BL8680	57591	MKL1
BL8688	6418	SET
BL8690	7984	ARHGEF5
BL8691	7984	ARHGEF5
BL8699	10620	ARID3B
BL8704	9732	DOCK4
BL8710	23328	SASH1
BL8716	22872	SEC31A
BL8719	867	CBL
BL8731	4298	MLLT1
BL8736	5546	PRCC
BL8759	1028	CDKN1C
BL8779	10801	2011-09-09
BL8783	201163	FLCN
BL8796	153090	DAB2IP
BL8804	6491	STIL
BL8814	57509	MTUS1
BL8865	5578	PRKCA
BL8868	5580	PRKCD
BL8876	55781	RIOK2
BL8882	51548	SIRT6
BL8901	23387	QSK
BL8921	6195	RPS6KA1
BL8931	6732	SRPK1
BL8936	114790	STK11IP
BL8954	6733	SRPK2
BL8964	54487	DGCR8
BL8979	5311	PKD2
BL8995	22794	CASC3
BL9016	6670	SP3
BL9055	8453	CUL2
BL9062	990	CDC6
BL9121	8317	CDC7
BL9124	22936	ELL2
BL9162	84433	CARD11
BL9173	10892	MALT1
BL9178	10399	GNB2L1
BL9187	29086	C19orf62
BL9197	79184	BRCC3
BL9238	9687	GREB1
BL9239	9687	GREB1
BL9240	9687	GREB1
BL9241	9687	GREB1
BL9273	9711	KIAA0226
BL9277	30849	PIK3R4
BL9419	84451	KIAA1804
BL9427	8550	MAPKAPK5
BL9428	51608	C7orf20
BL9429	51608	C7orf20
BL9430	51608	C7orf20
BL9431	51608	C7orf20
BL9456	1408	CRY2
BL9460	406	ARNTL
BL9468	9575	CLOCK
BL9484	2139	EYA2
BL9487	2140	EYA3
BL9498	2070	EYA4
BL9499	2070	EYA4
BL9548	7128	TNFAIP3
BL9565	5597	MAPK6
BL9569	5598	MAPK7
BL9584	2000	ELF4
BL9613	55364	IMPACT
BL9641	81550	TDRD3
BL9701	57118	CAMK1D
BL9709	3984	LIMK1
BL9749	23235	SIK2
BL9755	9263	STK17A
BL9793	55577	NAGK
a-ATM (Ab-3)	472	ATM
CBC12	4214	MAP3K1
CBC21	64223	MLST8
CBC22	64223	MLST8
CBC31	84271	POLDIP3
CBC32	84271	POLDIP3
CBC41	55226	NAT10
CBC42	55226	NAT10
CBC52	80218	NAT13
CBC171	116988	AGAP3
CBC173	116988	AGAP3
CBC174	116988	AGAP3
CBC181	23299	BICD2
CBC182	23299	BICD2
CBC183	23299	BICD2
CBC184	23299	BICD2
CBC191	54821	ERCC6L
CBC192	54821	ERCC6L
CBC193	54821	ERCC6L
CBC194	54821	ERCC6L
CBC331	369	ARAF
CBC332	369	ARAF
CBC361	10892	MALT1
CBC411	25909	AHCTF1
CBC412	25909	AHCTF1
CBC421	91748	C14orf43
CBC541	1540	CYLD
CBC542	1540	CYLD
CBC551	10460	TACC3
CBC552	10460	TACC3
CBC561	7917	BAT3
CBC562	7917	BAT3
CBC571	9700	ESPL1
CBC572	9700	ESPL1
CBC581	8242	KDM5C
CBC582	8242	KDM5C
CBC591	90293	KLHL13
CBC592	90293	KLHL13
CBC601	56852	RAD18
CBC602	56852	RAD18
CBC611	56254	RNF20
CBC612	56254	RNF20
CBC621	57592	ZNF687
CBC622	57592	ZNF687
CBC631	11214	AKAP13
CBC632	11214	AKAP13
CBC641	200014	CC2D1B
CBC642	200014	CC2D1B
CBC651	116988	AGAP3
CBC652	119016	AGAP4
CBC681	28964	GIT1
CBC682	28964	GIT1
CBC691	54676	GTPBP2
CBC692	84705	GTPBP3
CBC701	23022	PALLD
CBC702	23022	PALLD
CBC751	8239	USP9X
CBC752	8239	USP9X
CBC801
CBC802
CBC1591	2064	ERBB2
CBC1592	2064	ERBB2
CBC1841	10522	DEAF1
CBC1842	10522	DEAF1
CBC2031	23613	ZMYND8
CBC2032	23613	ZMYND8
CBC2132	49854	ZNF295
CBC2142	114799	ESCO1
CBC2152	55159	RFWD3
CBC2181	4798	NFRKB
CBC2182	4798	NFRKB
CBC2201	6257	RXRB
CBC2202	6257	RXRB
CBC2231	10270	AKAP8
CBC2232	10270	AKAP8
ABM-2052 (6H2.1)	5728	PTEN
CS-2123B	6714	SRC
CS-2126S	17979	Ncoa3
CS-2947B	1026	CDKN1A
CS-9665B	836	CASP3
a-Mip1	227743	Mapkap1
BRD4-N	23476	BRD4
BRD4-C	23476	BRD4
BL-ATM	472	ATM
JQ006	4436	MSH2
JQ007	2956	MSH6
JQ008	3550	IK
a-AKT (BS)	207	AKT1
a-BARD1	580	BARD1
SRC3_Wu	8202	NCOA3
a-USP9X	8239	USP9X
TRAF4	9618	TRAF4
a-GAS2	2620	GAS2
a-FTO (78)	79068	FTO
BL-PDS5B	23047	PDS5B
ZMYND8-D23	23613	ZMYND8
a-SKI	6497	SKI
a-CLSPN	63967	CLSPN
a-HAUSP	7874	USP7
MBNL1	4154	MBNL1
N2	157570	ESCO2
a-ARP5	79913	ACTR5
RFX5	5993	RFX5
a-NEK7	140609	NEK7
JQ021	55749	CCAR1
AB80	672	BRCA1
AB81	672	BRCA1
a-POT1	25913	POT1
a-PTEN (WG)	5728	PTEN
a-TSPYL1	7259	TSPYL1
a-REST (TW)	5978	REST
UHRF1	115426	UHRF2
HEXIM1 (JW)	10614	HEXIM1
PHF2-C Ab	5253	PHF2
UHRF2	115426	UHRF2
PHF8	23133	PHF8
a-ATR (YW)	545	ATR
a-PDSI	7986	GPDS1
GREB1 mAb	9687	GREB1
a-TRF2 (4A794)	7014	TERF2
EPI-1006-1	841	CASP8
EPI-1081-1	207	AKT1
EPI-1114-1	1956	EGFR
EPI-1236-1	5605	MAP2K2
EPI-1474-1	6197	RPS6KA3
EPI-1480-1	2185	PTK2B
EPI-1482-1	6197	RPS6KA3
EPI-1490-1	995	CDC25C
EPI-1526-1	573	BAG1
EPI-1540-1	890	CCNA2
EPI-1550-1	6714	SRC
EPI-1552-1	835	CASP2
EPI-1571-1	4738	NEDD8
EPI-1578-1	1978	EIF4EBP1
EPI-1586-1	5594	MAPK1
EPI-1594-1	660	BMX
EPI-1597-1	29760	BLNK
EPI-1605-1	5294	PIK3CG
EPI-1609-1	5781	PTPN11
EPI-1614-1	9759	HDAC4
EPI-1615-1	1147	CHUK
EPI-1616-1	25	ABL1
EPI-1618-1	7006	TEC
EPI-1622-1	4690	NCK1
EPI-1625-1	3702	ITK
EPI-1629-1	6464	SHC1
EPI-1640-1	5608	MAP2K6
EPI-1650-1	6416	MAP2K4
EPI-1664-1	10892	MALT1
EPI-1717-1	5063	PAK3
EPI-1728-1	5606	MAP2K3
EPI-1746-1	7409	VAV1
EPI-1751-1	2596	GAP43
EPI-1759-1	9265	CYTH3
EPI-1785-1	3718	JAK3
EPI-1786-1	3635	INPP5D
EPI-1804-1	4099	MAG
EPI-1931-1	5336	PLCG2
EPI-1958-1	3767	KCNJ11
EPI-1962-1	25865	PRKD2
EPI-1970-1	84557	MAP1LC3A
EPI-2046-1	1496	CTNNA2
EPI-2064-1	2064	ERBB2
EPI-2118-1	207	AKT1
EPI-2120-1	20847	Stat2
EPI-2180-1	7430	EZR
EPI-2214-1	207	AKT1
EPI-2219-1	5595	MAPK3
EPI-2249-1	2185	PTK2B
EPI-2263-1	5336	PLCG2
EPI-2269-1	8615	USO1
EPI-2282-1	5164	PDK2
EPI-2298-1	673	BRAF
EPI-2305-1	8744	TNFSF9
EPI-2341-1	1019	CDK4
EPI-2367-1	273	AMPH
EPI-2399-1	56259	CTNNBL1
EPI-2416-1	3149	HMGB3
EPI-2418-1	3835	KIF22
EPI-2424-1	51684	SUFU
EPI-2461-1	6118	RPA2
EPI-2476-1	1602	DACH1
EPI-2488-1	57761	TRIB3
EPI-2516-1	79679	VTCN1
EPI-2589-1	6117	RPA1
EPI-2593-1	861	RUNX1
EPI-2602-1	8533	COPS3
EPI-2603-1	9232	PTTG1
EPI-2610-1	9532	BAG2
EPI-2698-1	54518	APBB1IP
GTX105364	9577	BRE
GTX111188	9577	BRE
a-CCND1 (Ab3)	595	CCND1
a-HCV4	951475	HCVgp1
a-HCV5	951475	HCVgp1
a-HCV6	951475	HCVgp1
a-HCV9	951475	HCVgp1
a-HCV10	951475	HCVgp1
a-HCV15	951475	HCVgp1
NB106A	274	BIN1
NB120-3333	10197	PSME3
a-BRCC36	79184	BRCC3
SC-50	5925	RB1
SC-56	5111	PCNA
SC-97	993	CDC25A
SC-126	7157	TP53
SC-163	1017	CDK2
SC-185	602	BCL3
SC-187	1386	ATF2
SC-197	4149	MAX
SC-198	898	CCNE1
SC-232	5451	POU2F1
SC-242	1386	ATF2
SC-247	898	CCNE1
SC-251	1869	E2F1
SC-286	1445	CSK
SC-372	5970	RELA
SC-543	2099	ESR1
SC-582	4292	MLH1
SC-583	1387	CREBBP
SC-584	2033	EP300
SC-585	2033	EP300
SC-596	890	CCNA2
SC-797	1647	GADD45A
SC-834	14103	Fasl
SC-866	1874	E2F4
SC-867	9493	KIF23
SC-939	573	BAG1
SC-952	899	CCNF
SC-954	983	CDC2
SC-965	4193	MDM2
SC-1243	2956	MSH6
SC-1751	7072	TIA1
SC-5278	11200	CHEK2
SC-5299	25942	SIN3A
SC-5606	7518	XRCC4
SC-6062	6095	RORA
SC-6233	1386	ATF2
SC-6243	7157	TP53
SC-6954	672	BRCA1
SC-7160	7494	XBP1
SC-7216	8202	NCOA3
SC-7230	472	ATM
SC-7300	1387	CREBBP
SC-7898	1111	CHEK1
SC-8002	2099	ESR1
SC-8005	2099	ESR1
SC-8023	3428	IFI16
SC-8051	3726	JUNB
SC-8396	595	CCND1
SC-8405	4775	NFATC3
SC-8408	1111	CHEK1
SC-8410	3065	HDAC1
SC-8987	3172	HNF4A
SC-9019	2185	PTK2B
SC-9086	7182	NR2C2
SC-9087	7181	NR2C1
SC-9118	5170	PDPK1
SC-9959	3066	HDAC2
SC-9966	4176	MCM7
SC-10771	6850	SYK
SC-10784	5424	POLD1
SC-11354	10926	DBF4
SC-11421	51564	HDAC7
SC-12340R	983	CDC2
SC-12738	1457	CSNK2A1
SC-12739	1460	CSNK2B
SC-13064	190	NR0B1
SC-14016	8554	PIAS1
SC-14031	8928	FOXH1
SC-15402	4288	MKI67
SC-17748	11200	CHEK2
SC-20022	2177	FANCD2
SC-22811	5325	PLAGL1
SC-25359	4303	FOXO4
SC-25378	10524	KAT5
SC-28195	687	KLF9
SC-28236	8314	BAP1
SC-28241	4255	MGMT
SC-28595	5457	POU4F1
SC-28673	466	ATF1
SC-28676	6304	SATB1
SC-28746	23462	HEY1
SC-28748	7041	TGFB1I1
SC-28749	8031	NCOA4
SC-30169	8431	NR0B2
SC-32856	9604	RNF14
SC-33172	4616	GADD45B
SC-48788	2290	FOXG1
SC-48809	5989	RFX1
SC-48847	9577	BRE
SC-48849	9577	BRE
SC-50347	51588	PIAS4
SC-66857	9201	DCLK1
SC-67022	25803	SPDEF
SC-67041	23532	PRAME
SC-67074	29843	SENP1
SC-67285	133522	PPARGC1B
SC-71539	4100	MAGEA1
SC-81280	10499	NCOA2
SC-81983	5629	PROX1
SC-100432	4117	MAK
SC-100753	10691	GMEB1
SC-101092	23421	ITGB3BP
SC-102125	6881	TAF10
a-REGy	10197	PSME3
a-ABIN1	10318	TNIP1

## Sheet: Gene Products
GeneID	GENE Symbol	Description
2	A2M	alpha-2-macroglobulin
9	NAT1	N-acetyltransferase 1 (arylamine N-acetyltransferase)
12	SERPINA3	serpin peptidase inhibitor, clade A (alpha-1 antiproteinase, antitrypsin), member 3
15	AANAT	arylalkylamine N-acetyltransferase
16	AARS	alanyl-tRNA synthetase
18	ABAT	4-aminobutyrate aminotransferase
19	ABCA1	ATP-binding cassette, sub-family A (ABC1), member 1
20	ABCA2	ATP-binding cassette, sub-family A (ABC1), member 2
21	ABCA3	ATP-binding cassette, sub-family A (ABC1), member 3
23	ABCF1	ATP-binding cassette, sub-family F (GCN20), member 1
24	ABCA4	ATP-binding cassette, sub-family A (ABC1), member 4
25	ABL1	c-abl oncogene 1, receptor tyrosine kinase
27	ABL2	v-abl Abelson murine leukemia viral oncogene homolog 2 (arg, Abelson-related gene)
29	ABR	active BCR-related gene
30	ACAA1	acetyl-Coenzyme A acyltransferase 1
31	ACACA	acetyl-Coenzyme A carboxylase alpha
32	ACACB	acetyl-Coenzyme A carboxylase beta
33	ACADL	acyl-Coenzyme A dehydrogenase, long chain
34	ACADM	acyl-Coenzyme A dehydrogenase, C-4 to C-12 straight chain
35	ACADS	acyl-Coenzyme A dehydrogenase, C-2 to C-3 short chain
36	ACADSB	acyl-Coenzyme A dehydrogenase, short/branched chain
37	ACADVL	acyl-Coenzyme A dehydrogenase, very long chain
38	ACAT1	acetyl-Coenzyme A acetyltransferase 1
39	ACAT2	acetyl-Coenzyme A acetyltransferase 2
41	ACCN2	amiloride-sensitive cation channel 2, neuronal
47	ACLY	ATP citrate lyase
48	ACO1	aconitase 1, soluble
49	ACR	acrosin
50	ACO2	aconitase 2, mitochondrial
51	ACOX1	acyl-Coenzyme A oxidase 1, palmitoyl
52	ACP1	acid phosphatase 1, soluble
53	ACP2	acid phosphatase 2, lysosomal
58	ACTA1	actin, alpha 1, skeletal muscle
59	ACTA2	actin, alpha 2, smooth muscle, aorta
60	ACTB	actin, beta
70	ACTC1	actin, alpha, cardiac muscle 1
71	ACTG1	actin, gamma 1
72	ACTG2	actin, gamma 2, smooth muscle, enteric
81	ACTN4	actinin, alpha 4
86	ACTL6A	actin-like 6A
87	ACTN1	actinin, alpha 1
89	ACTN3	actinin, alpha 3
90	ACVR1	activin A receptor, type I
94	ACVRL1	activin A receptor type II-like 1
95	ACY1	aminoacylase 1
100	ADA	adenosine deaminase
102	ADAM10	ADAM metallopeptidase domain 10
103	ADAR	adenosine deaminase, RNA-specific
104	ADARB1	adenosine deaminase, RNA-specific, B1 (RED1 homolog rat)
108	ADCY2	adenylate cyclase 2 (brain)
109	ADCY3	adenylate cyclase 3
113	ADCY7	adenylate cyclase 7
114	ADCY8	adenylate cyclase 8 (brain)
115	ADCY9	adenylate cyclase 9
118	ADD1	adducin 1 (alpha)
119	ADD2	adducin 2 (beta)
120	ADD3	adducin 3 (gamma)
123	ADFP	adipose differentiation-related protein
126	ADH1C	alcohol dehydrogenase 1C (class I), gamma polypeptide
127	ADH4	alcohol dehydrogenase 4 (class II), pi polypeptide
128	ADH5	alcohol dehydrogenase 5 (class III), chi polypeptide
131	ADH7	alcohol dehydrogenase 7 (class IV), mu or sigma polypeptide
132	ADK	adenosine kinase
135	ADORA2A	adenosine A2a receptor
136	ADORA2B	adenosine A2b receptor
141	ADPRH	ADP-ribosylarginine hydrolase
142	PARP1	poly (ADP-ribose) polymerase 1
143	PARP4	poly (ADP-ribose) polymerase family, member 4
147	ADRA1B	adrenergic, alpha-1B-, receptor
150	ADRA2A	adrenergic, alpha-2A-, receptor
153	ADRB1	adrenergic, beta-1-, receptor
157	ADRBK2	adrenergic, beta, receptor kinase 2
158	ADSL	adenylosuccinate lyase
159	ADSS	adenylosuccinate synthase
160	AP2A1	adaptor-related protein complex 2, alpha 1 subunit
161	AP2A2	adaptor-related protein complex 2, alpha 2 subunit
162	AP1B1	adaptor-related protein complex 1, beta 1 subunit
163	AP2B1	adaptor-related protein complex 2, beta 1 subunit
164	AP1G1	adaptor-related protein complex 1, gamma 1 subunit
165	AEBP1	AE binding protein 1
166	AES	amino-terminal enhancer of split
173	AFM	afamin
174	AFP	alpha-fetoprotein
176	ACAN	aggrecan
178	AGL	amylo-1, 6-glucosidase, 4-alpha-glucanotransferase
183	AGT	angiotensinogen (serpin peptidase inhibitor, clade A, member 8)
186	AGTR2	angiotensin II receptor, type 2
191	AHCY	adenosylhomocysteinase
196	AHR	aryl hydrocarbon receptor
197	AHSG	alpha-2-HS-glycoprotein
199	AIF1	allograft inflammatory factor 1
202	AIM1	absent in melanoma 1
203	AK1	adenylate kinase 1
204	AK2	adenylate kinase 2
205	AK3L1	adenylate kinase 3-like 1
207	AKT1	v-akt murine thymoma viral oncogene homolog 1
208	AKT2	v-akt murine thymoma viral oncogene homolog 2
210	ALAD	aminolevulinate, delta-, dehydratase
211	ALAS1	aminolevulinate, delta-, synthase 1
212	ALAS2	aminolevulinate, delta-, synthase 2
214	ALCAM	activated leukocyte cell adhesion molecule
215	ABCD1	ATP-binding cassette, sub-family D (ALD), member 1
216	ALDH1A1	aldehyde dehydrogenase 1 family, member A1
217	ALDH2	aldehyde dehydrogenase 2 family (mitochondrial)
218	ALDH3A1	aldehyde dehydrogenase 3 family, memberA1
219	ALDH1B1	aldehyde dehydrogenase 1 family, member B1
220	ALDH1A3	aldehyde dehydrogenase 1 family, member A3
221	ALDH3B1	aldehyde dehydrogenase 3 family, member B1
223	ALDH9A1	aldehyde dehydrogenase 9 family, member A1
224	ALDH3A2	aldehyde dehydrogenase 3 family, member A2
225	ABCD2	ATP-binding cassette, sub-family D (ALD), member 2
226	ALDOA	aldolase A, fructose-bisphosphate
229	ALDOB	aldolase B, fructose-bisphosphate
230	ALDOC	aldolase C, fructose-bisphosphate
231	AKR1B1	aldo-keto reductase family 1, member B1 (aldose reductase)
239	ALOX12	arachidonate 12-lipoxygenase
242	ALOX12B	arachidonate 12-lipoxygenase, 12R type
244	ANXA8L2	annexin A8-like 2
246	ALOX15	arachidonate 15-lipoxygenase
248	ALPI	alkaline phosphatase, intestinal
251	ALPPL2	alkaline phosphatase, placental-like 2
257	ALX3	ALX homeobox 3
262	AMD1	adenosylmethionine decarboxylase 1
267	AMFR	autocrine motility factor receptor
268	AMH	anti-Mullerian hormone
269	AMHR2	anti-Mullerian hormone receptor, type II
271	AMPD2	adenosine monophosphate deaminase 2 (isoform L)
272	AMPD3	adenosine monophosphate deaminase (isoform E)
273	AMPH	amphiphysin
274	BIN1	bridging integrator 1
277	AMY1B	amylase, alpha 1B (salivary)
278	AMY1C	amylase, alpha 1C (salivary)
280	AMY2B	amylase, alpha 2B (pancreatic)
285	ANGPT2	angiopoietin 2
286	ANK1	ankyrin 1, erythrocytic
287	ANK2	ankyrin 2, neuronal
290	ANPEP	alanyl (membrane) aminopeptidase
291	SLC25A4	solute carrier family 25 (mitochondrial carrier; adenine nucleotide translocator), member 4
292	SLC25A5	solute carrier family 25 (mitochondrial carrier; adenine nucleotide translocator), member 5
293	SLC25A6	solute carrier family 25 (mitochondrial carrier; adenine nucleotide translocator), member 6
301	ANXA1	annexin A1
302	ANXA2	annexin A2
306	ANXA3	annexin A3
307	ANXA4	annexin A4
308	ANXA5	annexin A5
309	ANXA6	annexin A6
310	ANXA7	annexin A7
311	ANXA11	annexin A11
314	AOC2	amine oxidase, copper containing 2 (retina-specific)
316	AOX1	aldehyde oxidase 1
317	APAF1	apoptotic peptidase activating factor 1
318	NUDT2	nudix (nucleoside diphosphate linked moiety X)-type motif 2
319	APOF	apolipoprotein F
321	APBA2	amyloid beta (A4) precursor protein-binding, family A, member 2
322	APBB1	amyloid beta (A4) precursor protein-binding, family B, member 1 (Fe65)
323	APBB2	amyloid beta (A4) precursor protein-binding, family B, member 2
324	APC	adenomatous polyposis coli
327	APEH	N-acylaminoacyl-peptide hydrolase
328	APEX1	APEX nuclease (multifunctional DNA repair enzyme) 1
329	BIRC2	baculoviral IAP repeat-containing 2
331	XIAP	X-linked inhibitor of apoptosis
334	APLP2	amyloid beta (A4) precursor-like protein 2
335	APOA1	apolipoprotein A-I
336	APOA2	apolipoprotein A-II
337	APOA4	apolipoprotein A-IV
345	APOC3	apolipoprotein C-III
347	APOD	apolipoprotein D
348	APOE	apolipoprotein E
350	APOH	apolipoprotein H (beta-2-glycoprotein I)
353	APRT	adenine phosphoribosyltransferase
357	SHROOM2	shroom family member 2
361	AQP4	aquaporin 4
368	ABCC6	ATP-binding cassette, sub-family C (CFTR/MRP), member 6
369	ARAF	v-raf murine sarcoma 3611 viral oncogene homolog
372	ARCN1	archain 1
375	ARF1	ADP-ribosylation factor 1
377	ARF3	ADP-ribosylation factor 3
378	ARF4	ADP-ribosylation factor 4
381	ARF5	ADP-ribosylation factor 5
382	ARF6	ADP-ribosylation factor 6
383	ARG1	arginase, liver
384	ARG2	arginase, type II
387	RHOA	ras homolog gene family, member A
388	RHOB	ras homolog gene family, member B
391	RHOG	ras homolog gene family, member G (rho G)
392	ARHGAP1	Rho GTPase activating protein 1
393	ARHGAP4	Rho GTPase activating protein 4
394	ARHGAP5	Rho GTPase activating protein 5
395	ARHGAP6	Rho GTPase activating protein 6
396	ARHGDIA	Rho GDP dissociation inhibitor (GDI) alpha
398	ARHGDIG	Rho GDP dissociation inhibitor (GDI) gamma
400	ARL1	ADP-ribosylation factor-like 1
402	ARL2	ADP-ribosylation factor-like 2
403	ARL3	ADP-ribosylation factor-like 3
405	ARNT	aryl hydrocarbon receptor nuclear translocator
406	ARNTL	aryl hydrocarbon receptor nuclear translocator-like
407	ARR3	arrestin 3, retinal (X-arrestin)
408	ARRB1	arrestin, beta 1
409	ARRB2	arrestin, beta 2
412	STS	steroid sulfatase (microsomal), isozyme S
419	ART3	ADP-ribosyltransferase 3
421	ARVCF	armadillo repeat gene deletes in velocardiofacial syndrome
427	ASAH1	N-acylsphingosine amidohydrolase (acid ceramidase) 1
435	ASL	argininosuccinate lyase
439	ASNA1	arsA arsenite transporter, ATP-binding, homolog 1 (bacterial)
440	ASNS	asparagine synthetase
444	ASPH	aspartate beta-hydroxylase
445	ASS1	argininosuccinate synthetase 1
462	SERPINC1	serpin peptidase inhibitor, clade C (antithrombin), member 1
463	ZFHX3	zinc finger homeobox 3
466	ATF1	activating transcription factor 1
471	ATIC	5-aminoimidazole-4-carboxamide ribonucleotide formyltransferase/IMP cyclohydrolase
472	ATM	ataxia telangiectasia mutated
473	RERE	arginine-glutamic acid dipeptide (RE) repeats
476	ATP1A1	ATPase, Na+/K+ transporting, alpha 1 polypeptide
477	ATP1A2	ATPase, Na+/K+ transporting, alpha 2 (+) polypeptide
478	ATP1A3	ATPase, Na+/K+ transporting, alpha 3 polypeptide
479	ATP12A	ATPase, H+/K+ transporting, nongastric, alpha polypeptide
480	ATP1A4	ATPase, Na+/K+ transporting, alpha 4 polypeptide
481	ATP1B1	ATPase, Na+/K+ transporting, beta 1 polypeptide
483	ATP1B3	ATPase, Na+/K+ transporting, beta 3 polypeptide
486	FXYD2	FXYD domain containing ion transport regulator 2
487	ATP2A1	ATPase, Ca++ transporting, cardiac muscle, fast twitch 1
488	ATP2A2	ATPase, Ca++ transporting, cardiac muscle, slow twitch 2
489	ATP2A3	ATPase, Ca++ transporting, ubiquitous
490	ATP2B1	ATPase, Ca++ transporting, plasma membrane 1
491	ATP2B2	ATPase, Ca++ transporting, plasma membrane 2
492	ATP2B3	ATPase, Ca++ transporting, plasma membrane 3
495	ATP4A	ATPase, H+/K+ exchanging, alpha polypeptide
498	ATP5A1	ATP synthase, H+ transporting, mitochondrial F1 complex, alpha subunit 1, cardiac muscle
501	ALDH7A1	aldehyde dehydrogenase 7 family, member A1
506	ATP5B	ATP synthase, H+ transporting, mitochondrial F1 complex, beta polypeptide
509	ATP5C1	ATP synthase, H+ transporting, mitochondrial F1 complex, gamma polypeptide 1
513	ATP5D	ATP synthase, H+ transporting, mitochondrial F1 complex, delta subunit
515	ATP5F1	ATP synthase, H+ transporting, mitochondrial F0 complex, subunit B1
523	ATP6V1A	ATPase, H+ transporting, lysosomal 70kDa, V1 subunit A
526	ATP6V1B2	ATPase, H+ transporting, lysosomal 56/58kDa, V1 subunit B2
528	ATP6V1C1	ATPase, H+ transporting, lysosomal 42kDa, V1 subunit C1
529	ATP6V1E1	ATPase, H+ transporting, lysosomal 31kDa, V1 subunit E1
534	ATP6V1G2	ATPase, H+ transporting, lysosomal 13kDa, V1 subunit G2
535	ATP6V0A1	ATPase, H+ transporting, lysosomal V0 subunit a1
538	ATP7A	ATPase, Cu++ transporting, alpha polypeptide
539	ATP5O	ATP synthase, H+ transporting, mitochondrial F1 complex, O subunit
545	ATR	ataxia telangiectasia and Rad3 related
546	ATRX	alpha thalassemia/mental retardation syndrome X-linked (RAD54 homolog, S. cerevisiae)
547	KIF1A	kinesin family member 1A
550	AUP1	ancient ubiquitous protein 1
563	AZGP1	alpha-2-glycoprotein 1, zinc-binding
566	AZU1	azurocidin 1
567	B2M	beta-2-microglobulin
570	BAAT	bile acid Coenzyme A: amino acid N-acyltransferase (glycine N-choloyltransferase)
571	BACH1	BTB and CNC homology 1, basic leucine zipper transcription factor 1
573	BAG1	BCL2-associated athanogene
575	BAI1	brain-specific angiogenesis inhibitor 1
577	BAI3	brain-specific angiogenesis inhibitor 3
579	NKX3-2	NK3 homeobox 2
580	BARD1	BRCA1 associated RING domain 1
581	BAX	BCL2-associated X protein
583	BBS2	Bardet-Biedl syndrome 2
586	BCAT1	branched chain aminotransferase 1, cytosolic
590	BCHE	butyrylcholinesterase
593	BCKDHA	branched chain keto acid dehydrogenase E1, alpha polypeptide
594	BCKDHB	branched chain keto acid dehydrogenase E1, beta polypeptide
595	CCND1	cyclin D1
602	BCL3	B-cell CLL/lymphoma 3
604	BCL6	B-cell CLL/lymphoma 6
605	BCL7A	B-cell CLL/lymphoma 7A
607	BCL9	B-cell CLL/lymphoma 9
608	TNFRSF17	tumor necrosis factor receptor superfamily, member 17
610	HCN2	hyperpolarization activated cyclic nucleotide-gated potassium channel 2
613	BCR	breakpoint cluster region
622	BDH1	3-hydroxybutyrate dehydrogenase, type 1
629	CFB	complement factor B
635	BHMT	betaine-homocysteine methyltransferase
636	BICD1	bicaudal D homolog 1 (Drosophila)
637	BID	BH3 interacting domain death agonist
639	PRDM1	PR domain containing 1, with ZNF domain
640	BLK	B lymphoid tyrosine kinase
641	BLM	Bloom syndrome, RecQ helicase-like
642	BLMH	bleomycin hydrolase
644	BLVRA	biliverdin reductase A
645	BLVRB	biliverdin reductase B (flavin reductase (NADPH))
648	BMI1	BMI1 polycomb ring finger oncogene
649	BMP1	bone morphogenetic protein 1
651	BMP3	bone morphogenetic protein 3
652	BMP4	bone morphogenetic protein 4
654	BMP6	bone morphogenetic protein 6
659	BMPR2	bone morphogenetic protein receptor, type II (serine/threonine kinase)
660	BMX	BMX non-receptor tyrosine kinase
661	POLR3D	polymerase (RNA) III (DNA directed) polypeptide D, 44kDa
663	BNIP2	BCL2/adenovirus E1B 19kDa interacting protein 2
665	BNIP3L	BCL2/adenovirus E1B 19kDa interacting protein 3-like
666	BOK	BCL2-related ovarian killer
667	DST	dystonin
669	BPGM	2,3-bisphosphoglycerate mutase
670	BPHL	biphenyl hydrolase-like (serine hydrolase)
672	BRCA1	breast cancer 1, early onset
673	BRAF	v-raf murine sarcoma viral oncogene homolog B1
675	BRCA2	breast cancer 2, early onset
676	BRDT	bromodomain, testis-specific
677	ZFP36L1	zinc finger protein 36, C3H type-like 1
678	ZFP36L2	zinc finger protein 36, C3H type-like 2
682	BSG	basigin (Ok blood group)
687	KLF9	Kruppel-like factor 9
688	KLF5	Kruppel-like factor 5 (intestinal)
689	BTF3	basic transcription factor 3
699	BUB1	budding uninhibited by benzimidazoles 1 homolog (yeast)
701	BUB1B	budding uninhibited by benzimidazoles 1 homolog beta (yeast)
705	BYSL	bystin-like
708	C1QBP	complement component 1, q subcomponent binding protein
710	SERPING1	serpin peptidase inhibitor, clade G (C1 inhibitor), member 1
713	C1QB	complement component 1, q subcomponent, B chain
714	C1QC	complement component 1, q subcomponent, C chain
715	C1R	complement component 1, r subcomponent
718	C3	complement component 3
720	C4A	complement component 4A (Rodgers blood group)
721	C4B	complement component 4B (Chido blood group)
725	C4BPB	complement component 4 binding protein, beta
726	CAPN5	calpain 5
727	C5	complement component 5
729	C6	complement component 6
730	C7	complement component 7
731	C8A	complement component 8, alpha polypeptide
732	C8B	complement component 8, beta polypeptide
733	C8G	complement component 8, gamma polypeptide
735	C9	complement component 9
738	C11orf2	chromosome 11 open reading frame2
740	MRPL49	mitochondrial ribosomal protein L49
741	ZNHIT2	zinc finger, HIT type 2
747	DAGLA	diacylglycerol lipase, alpha
752	FMNL1	formin-like 1
755	C21orf2	chromosome 21 open reading frame 2
758	MPPED1	metallophosphoesterase domain containing 1
759	CA1	carbonic anhydrase I
760	CA2	carbonic anhydrase II
761	CA3	carbonic anhydrase III, muscle specific
768	CA9	carbonic anhydrase IX
773	CACNA1A	calcium channel, voltage-dependent, P/Q type, alpha 1A subunit
774	CACNA1B	calcium channel, voltage-dependent, N type, alpha 1B subunit
775	CACNA1C	calcium channel, voltage-dependent, L type, alpha 1C subunit
776	CACNA1D	calcium channel, voltage-dependent, L type, alpha 1D subunit
777	CACNA1E	calcium channel, voltage-dependent, R type, alpha 1E subunit
778	CACNA1F	calcium channel, voltage-dependent, L type, alpha 1F subunit
779	CACNA1S	calcium channel, voltage-dependent, L type, alpha 1S subunit
781	CACNA2D1	calcium channel, voltage-dependent, alpha 2/delta subunit 1
782	CACNB1	calcium channel, voltage-dependent, beta 1 subunit
784	CACNB3	calcium channel, voltage-dependent, beta 3 subunit
785	CACNB4	calcium channel, voltage-dependent, beta 4 subunit
788	SLC25A20	solute carrier family 25 (carnitine/acylcarnitine translocase), member 20
790	CAD	carbamoyl-phosphate synthetase 2, aspartate transcarbamylase, and dihydroorotase
794	CALB2	calbindin 2
800	CALD1	caldesmon 1
801	CALM1	calmodulin 1 (phosphorylase kinase, delta)
805	CALM2	calmodulin 2 (phosphorylase kinase, delta)
808	CALM3	calmodulin 3 (phosphorylase kinase, delta)
810	CALML3	calmodulin-like 3
811	CALR	calreticulin
813	CALU	calumenin
814	CAMK4	calcium/calmodulin-dependent protein kinase IV
815	CAMK2A	calcium/calmodulin-dependent protein kinase II alpha
816	CAMK2B	calcium/calmodulin-dependent protein kinase II beta
817	CAMK2D	calcium/calmodulin-dependent protein kinase II delta
818	CAMK2G	calcium/calmodulin-dependent protein kinase II gamma
820	CAMP	cathelicidin antimicrobial peptide
821	CANX	calnexin
822	CAPG	capping protein (actin filament), gelsolin-like
823	CAPN1	calpain 1, (mu/I) large subunit
824	CAPN2	calpain 2, (m/II) large subunit
826	CAPNS1	calpain, small subunit 1
829	CAPZA1	capping protein (actin filament) muscle Z-line, alpha 1
830	CAPZA2	capping protein (actin filament) muscle Z-line, alpha 2
831	CAST	calpastatin
832	CAPZB	capping protein (actin filament) muscle Z-line, beta
833	CARS	cysteinyl-tRNA synthetase
834	CASP1	caspase 1, apoptosis-related cysteine peptidase (interleukin 1, beta, convertase)
835	CASP2	caspase 2, apoptosis-related cysteine peptidase
836	CASP3	caspase 3, apoptosis-related cysteine peptidase
838	CASP5	caspase 5, apoptosis-related cysteine peptidase
839	CASP6	caspase 6, apoptosis-related cysteine peptidase
840	CASP7	caspase 7, apoptosis-related cysteine peptidase
843	CASP10	caspase 10, apoptosis-related cysteine peptidase
847	CAT	catalase
857	CAV1	caveolin 1, caveolae protein, 22kDa
858	CAV2	caveolin 2
860	RUNX2	runt-related transcription factor 2
861	RUNX1	runt-related transcription factor 1
863	CBFA2T3	core-binding factor, runt domain, alpha subunit 2; translocated to, 3
865	CBFB	core-binding factor, beta subunit
867	CBL	Cas-Br-M (murine) ecotropic retroviral transforming sequence
868	CBLB	Cas-Br-M (murine) ecotropic retroviral transforming sequence b
871	SERPINH1	serpin peptidase inhibitor, clade H (heat shock protein 47), member 1, (collagen binding protein 1)
873	CBR1	carbonyl reductase 1
874	CBR3	carbonyl reductase 3
875	CBS	cystathionine-beta-synthase
889	KRIT1	KRIT1, ankyrin repeat containing
890	CCNA2	cyclin A2
891	CCNB1	cyclin B1
892	CCNC	cyclin C
894	CCND2	cyclin D2
896	CCND3	cyclin D3
898	CCNE1	cyclin E1
899	CCNF	cyclin F
900	CCNG1	cyclin G1
902	CCNH	cyclin H
904	CCNT1	cyclin T1
905	CCNT2	cyclin T2
908	CCT6A	chaperonin containing TCP1, subunit 6A (zeta 1)
909	CD1A	CD1a molecule
913	CD1E	CD1e molecule
914	CD2	CD2 molecule
916	CD3E	CD3e molecule, epsilon (CD3-TCR complex)
917	CD3G	CD3g molecule, gamma (CD3-TCR complex)
928	CD9	CD9 molecule
930	CD19	CD19 molecule
933	CD22	CD22 molecule
939	CD27	CD27 molecule
942	CD86	CD86 molecule
946	SIGLEC6	sialic acid binding Ig-like lectin 6
948	CD36	CD36 molecule (thrombospondin receptor)
949	SCARB1	scavenger receptor class B, member 1
950	SCARB2	scavenger receptor class B, member 2
953	ENTPD1	ectonucleoside triphosphate diphosphohydrolase 1
956	ENTPD3	ectonucleoside triphosphate diphosphohydrolase 3
957	ENTPD5	ectonucleoside triphosphate diphosphohydrolase 5
962	CD48	CD48 molecule
969	CD69	CD69 molecule
983	CDC2	cell division cycle 2, G1 to S and G2 to M
984	CDC2L1	cell division cycle 2-like 1 (PITSLRE proteins)
987	LRBA	LPS-responsive vesicle trafficking, beach and anchor containing
988	CDC5L	CDC5 cell division cycle 5-like (S. pombe)
989	SEPT7	septin 7
990	CDC6	cell division cycle 6 homolog (S. cerevisiae)
991	CDC20	cell division cycle 20 homolog (S. cerevisiae)
993	CDC25A	cell division cycle 25 homolog A (S. pombe)
994	CDC25B	cell division cycle 25 homolog B (S. pombe)
995	CDC25C	cell division cycle 25 homolog C (S. pombe)
996	CDC27	cell division cycle 27 homolog (S. cerevisiae)
998	CDC42	cell division cycle 42 (GTP binding protein, 25kDa)
999	CDH1	cadherin 1, type 1, E-cadherin (epithelial)
1000	CDH2	cadherin 2, type 1, N-cadherin (neuronal)
1002	CDH4	cadherin 4, type 1, R-cadherin (retinal)
1004	CDH6	cadherin 6, type 2, K-cadherin (fetal kidney)
1006	CDH8	cadherin 8, type 2
1007	CDH9	cadherin 9, type 2 (T1-cadherin)
1008	CDH10	cadherin 10, type 2 (T2-cadherin)
1009	CDH11	cadherin 11, type 2, OB-cadherin (osteoblast)
1012	CDH13	cadherin 13, H-cadherin (heart)
1013	CDH15	cadherin 15, type 1, M-cadherin (myotubule)
1016	CDH18	cadherin 18, type 2
1017	CDK2	cyclin-dependent kinase 2
1018	CDK3	cyclin-dependent kinase 3
1019	CDK4	cyclin-dependent kinase 4
1020	CDK5	cyclin-dependent kinase 5
1021	CDK6	cyclin-dependent kinase 6
1022	CDK7	cyclin-dependent kinase 7
1024	CDK8	cyclin-dependent kinase 8
1025	CDK9	cyclin-dependent kinase 9
1026	CDKN1A	cyclin-dependent kinase inhibitor 1A (p21, Cip1)
1027	CDKN1B	cyclin-dependent kinase inhibitor 1B (p27, Kip1)
1028	CDKN1C	cyclin-dependent kinase inhibitor 1C (p57, Kip2)
1029	CDKN2A	cyclin-dependent kinase inhibitor 2A (melanoma, p16, inhibits CDK4)
1030	CDKN2B	cyclin-dependent kinase inhibitor 2B (p15, inhibits CDK4)
1032	CDKN2D	cyclin-dependent kinase inhibitor 2D (p19, inhibits CDK4)
1039	CDR2	cerebellar degeneration-related protein 2, 62kDa
1040	CDS1	CDP-diacylglycerol synthase (phosphatidate cytidylyltransferase) 1
1041	CDSN	corneodesmosin
1051	CEBPB	CCAAT/enhancer binding protein (C/EBP), beta
1052	CEBPD	CCAAT/enhancer binding protein (C/EBP), delta
1060	CENPC1	centromere protein C 1
1062	CENPE	centromere protein E, 312kDa
1063	CENPF	centromere protein F, 350/400ka (mitosin)
1066	CES1	carboxylesterase 1 (monocyte/macrophage serine esterase 1)
1068	CETN1	centrin, EF-hand protein, 1
1069	CETN2	centrin, EF-hand protein, 2
1070	CETN3	centrin, EF-hand protein, 3 (CDC31 homolog, yeast)
1071	CETP	cholesteryl ester transfer protein, plasma
1072	CFL1	cofilin 1 (non-muscle)
1073	CFL2	cofilin 2 (muscle)
1075	CTSC	cathepsin C
1080	CFTR	cystic fibrosis transmembrane conductance regulator (ATP-binding cassette sub-family C, member 7)
1102	RCBTB2	regulator of chromosome condensation (RCC1) and BTB (POZ) domain containing protein 2
1103	CHAT	choline acetyltransferase
1104	RCC1	regulator of chromosome condensation 1
1105	CHD1	chromodomain helicase DNA binding protein 1
1107	CHD3	chromodomain helicase DNA binding protein 3
1108	CHD4	chromodomain helicase DNA binding protein 4
1111	CHEK1	CHK1 checkpoint homolog (S. pombe)
1112	FOXN3	forkhead box N3
1114	CHGB	chromogranin B (secretogranin 1)
1119	CHKA	choline kinase alpha
1120	CHKB	choline kinase beta
1121	CHM	choroideremia (Rab escort protein 1)
1122	CHML	choroideremia-like (Rab escort protein 2)
1123	CHN1	chimerin (chimaerin) 1
1130	LYST	lysosomal trafficking regulator
1134	CHRNA1	cholinergic receptor, nicotinic, alpha 1 (muscle)
1137	CHRNA4	cholinergic receptor, nicotinic, alpha 4
1139	CHRNA7	cholinergic receptor, nicotinic, alpha 7
1144	CHRND	cholinergic receptor, nicotinic, delta
1147	CHUK	conserved helix-loop-helix ubiquitous kinase
1152	CKB	creatine kinase, brain
1153	CIRBP	cold inducible RNA binding protein
1155	TBCB	tubulin folding cofactor B
1158	CKM	creatine kinase, muscle
1159	CKMT1B	creatine kinase, mitochondrial 1B
1161	ERCC8	excision repair cross-complementing rodent repair deficiency, complementation group 8
1163	CKS1B	CDC28 protein kinase regulatory subunit 1B
1164	CKS2	CDC28 protein kinase regulatory subunit 2
1173	AP2M1	adaptor-related protein complex 2, mu 1 subunit
1174	AP1S1	adaptor-related protein complex 1, sigma 1 subunit
1176	AP3S1	adaptor-related protein complex 3, sigma 1 subunit
1179	CLCA1	chloride channel accessory 1
1180	CLCN1	chloride channel 1, skeletal muscle
1182	CLCN3	chloride channel 3
1184	CLCN5	chloride channel 5
1191	CLU	clusterin
1192	CLIC1	chloride intracellular channel 1
1195	CLK1	CDC-like kinase 1
1196	CLK2	CDC-like kinase 2
1198	CLK3	CDC-like kinase 3
1203	CLN5	ceroid-lipofuscinosis, neuronal 5
1207	CLNS1A	chloride channel, nucleotide-sensitive, 1A
1209	CLPTM1	cleft lip and palate associated transmembrane protein 1
1211	CLTA	clathrin, light chain (Lca)
1212	CLTB	clathrin, light chain (Lcb)
1213	CLTC	clathrin, heavy chain (Hc)
1232	CCR3	chemokine (C-C motif) receptor 3
1244	ABCC2	ATP-binding cassette, sub-family C (CFTR/MRP), member 2
1261	CNGA3	cyclic nucleotide gated channel alpha 3
1265	CNN2	calponin 2
1266	CNN3	calponin 3, acidic
1267	CNP	2',3'-cyclic nucleotide 3' phosphodiesterase
1269	CNR2	cannabinoid receptor 2 (macrophage)
1271	CNTFR	ciliary neurotrophic factor receptor
1311	COMP	cartilage oligomeric matrix protein
1312	COMT	catechol-O-methyltransferase
1314	COPA	coatomer protein complex, subunit alpha
1315	COPB1	coatomer protein complex, subunit beta 1
1326	MAP3K8	mitogen-activated protein kinase kinase kinase 8
1327	COX4I1	cytochrome c oxidase subunit IV isoform 1
1356	CP	ceruloplasmin (ferroxidase)
1358	CPA2	carboxypeptidase A2 (pancreatic)
1359	CPA3	carboxypeptidase A3 (mast cell)
1362	CPD	carboxypeptidase D
1368	CPM	carboxypeptidase M
1371	CPOX	coproporphyrinogen oxidase
1373	CPS1	carbamoyl-phosphate synthetase 1, mitochondrial
1374	CPT1A	carnitine palmitoyltransferase 1A (liver)
1375	CPT1B	carnitine palmitoyltransferase 1B (muscle)
1376	CPT2	carnitine palmitoyltransferase 2
1378	CR1	complement component (3b/4b) receptor 1 (Knops blood group)
1382	CRABP2	cellular retinoic acid binding protein 2
1384	CRAT	carnitine acetyltransferase
1385	CREB1	cAMP responsive element binding protein 1
1386	ATF2	activating transcription factor 2
1387	CREBBP	CREB binding protein
1388	ATF6B	activating transcription factor 6 beta
1390	CREM	cAMP responsive element modulator
1397	CRIP2	cysteine-rich protein 2
1398	CRK	v-crk sarcoma virus CT10 oncogene homolog (avian)
1400	CRMP1	collapsin response mediator protein 1
1404	HAPLN1	hyaluronan and proteoglycan link protein 1
1407	CRY1	cryptochrome 1 (photolyase-like)
1408	CRY2	cryptochrome 2 (photolyase-like)
1409	CRYAA	crystallin, alpha A
1410	CRYAB	crystallin, alpha B
1414	CRYBB1	crystallin, beta B1
1419	CRYGB	crystallin, gamma B
1420	CRYGC	crystallin, gamma C
1429	CRYZ	crystallin, zeta (quinone reductase)
1431	CS	citrate synthase
1432	MAPK14	mitogen-activated protein kinase 14
1434	CSE1L	CSE1 chromosome segregation 1-like (yeast)
1436	CSF1R	colony stimulating factor 1 receptor
1439	CSF2RB	colony stimulating factor 2 receptor, beta, low-affinity (granulocyte-macrophage)
1445	CSK	c-src tyrosine kinase
1452	CSNK1A1	casein kinase 1, alpha 1
1453	CSNK1D	casein kinase 1, delta
1454	CSNK1E	casein kinase 1, epsilon
1457	CSNK2A1	casein kinase 2, alpha 1 polypeptide
1459	CSNK2A2	casein kinase 2, alpha prime polypeptide
1460	CSNK2B	casein kinase 2, beta polypeptide
1462	VCAN	versican
1464	CSPG4	chondroitin sulfate proteoglycan 4
1465	CSRP1	cysteine and glycine-rich protein 1
1466	CSRP2	cysteine and glycine-rich protein 2
1468	SLC25A10	solute carrier family 25 (mitochondrial carrier; dicarboxylate transporter), member 10
1469	CST1	cystatin SN
1472	CST4	cystatin S
1474	CST6	cystatin E/M
1475	CSTA	cystatin A (stefin A)
1476	CSTB	cystatin B (stefin B)
1477	CSTF1	cleavage stimulation factor, 3' pre-RNA, subunit 1, 50kDa
1478	CSTF2	cleavage stimulation factor, 3' pre-RNA, subunit 2, 64kDa
1479	CSTF3	cleavage stimulation factor, 3' pre-RNA, subunit 3, 77kDa
1482	NKX2-5	NK2 transcription factor related, locus 5 (Drosophila)
1486	CTBS	chitobiase, di-N-acetyl-
1487	CTBP1	C-terminal binding protein 1
1488	CTBP2	C-terminal binding protein 2
1490	CTGF	connective tissue growth factor
1491	CTH	cystathionase (cystathionine gamma-lyase)
1495	CTNNA1	catenin (cadherin-associated protein), alpha 1, 102kDa
1496	CTNNA2	catenin (cadherin-associated protein), alpha 2
1499	CTNNB1	catenin (cadherin-associated protein), beta 1, 88kDa
1500	CTNND1	catenin (cadherin-associated protein), delta 1
1501	CTNND2	catenin (cadherin-associated protein), delta 2 (neural plakophilin-related arm-repeat protein)
1503	CTPS	CTP synthase
1508	CTSB	cathepsin B
1509	CTSD	cathepsin D
1519	CTSO	cathepsin O
1520	CTSS	cathepsin S
1521	CTSW	cathepsin W
1522	CTSZ	cathepsin Z
1523	CUX1	cut-like homeobox 1
1535	CYBA	cytochrome b-245, alpha polypeptide
1537	CYC1	cytochrome c-1
1539	CYLC2	cylicin, basic protein of sperm head cytoskeleton 2
1540	CYLD	cylindromatosis (turban tumor syndrome)
1543	CYP1A1	cytochrome P450, family 1, subfamily A, polypeptide 1
1545	CYP1B1	cytochrome P450, family 1, subfamily B, polypeptide 1
1549	CYP2A7	cytochrome P450, family 2, subfamily A, polypeptide 7
1553	CYP2A13	cytochrome P450, family 2, subfamily A, polypeptide 13
1555	CYP2B6	cytochrome P450, family 2, subfamily B, polypeptide 6
1557	CYP2C19	cytochrome P450, family 2, subfamily C, polypeptide 19
1565	CYP2D6	cytochrome P450, family 2, subfamily D, polypeptide 6
1571	CYP2E1	cytochrome P450, family 2, subfamily E, polypeptide 1
1573	CYP2J2	cytochrome P450, family 2, subfamily J, polypeptide 2
1581	CYP7A1	cytochrome P450, family 7, subfamily A, polypeptide 1
1582	CYP8B1	cytochrome P450, family 8, subfamily B, polypeptide 1
1583	CYP11A1	cytochrome P450, family 11, subfamily A, polypeptide 1
1585	CYP11B2	cytochrome P450, family 11, subfamily B, polypeptide 2
1586	CYP17A1	cytochrome P450, family 17, subfamily A, polypeptide 1
1589	CYP21A2	cytochrome P450, family 21, subfamily A, polypeptide 2
1591	CYP24A1	cytochrome P450, family 24, subfamily A, polypeptide 1
1593	CYP27A1	cytochrome P450, family 27, subfamily A, polypeptide 1
1595	CYP51A1	cytochrome P450, family 51, subfamily A, polypeptide 1
1601	DAB2	disabled homolog 2, mitogen-responsive phosphoprotein (Drosophila)
1604	CD55	CD55 molecule, decay accelerating factor for complement (Cromer blood group)
1605	DAG1	dystroglycan 1 (dystrophin-associated glycoprotein 1)
1606	DGKA	diacylglycerol kinase, alpha 80kDa
1607	DGKB	diacylglycerol kinase, beta 90kDa
1608	DGKG	diacylglycerol kinase, gamma 90kDa
1609	DGKQ	diacylglycerol kinase, theta 110kDa
1611	DAP	death-associated protein
1612	DAPK1	death-associated protein kinase 1
1613	DAPK3	death-associated protein kinase 3
1615	DARS	aspartyl-tRNA synthetase
1616	DAXX	death-domain associated protein
1620	DBC1	deleted in bladder cancer 1
1622	DBI	diazepam binding inhibitor (GABA receptor modulator, acyl-Coenzyme A binding protein)
1627	DBN1	drebrin 1
1629	DBT	dihydrolipoamide branched chain transacylase E2
1632	DCI	dodecenoyl-Coenzyme A delta isomerase (3,2 trans-enoyl-Coenzyme A isomerase)
1635	DCTD	dCMP deaminase
1639	DCTN1	dynactin 1 (p150, glued homolog, Drosophila)
1642	DDB1	damage-specific DNA binding protein 1, 127kDa
1643	DDB2	damage-specific DNA binding protein 2, 48kDa
1646	AKR1C2	aldo-keto reductase family 1, member C2 (dihydrodiol dehydrogenase 2; bile acid binding protein; 3-alpha hydroxysteroid dehydrogenase, type III)
1650	DDOST	dolichyl-diphosphooligosaccharide-protein glycosyltransferase
1652	DDT	D-dopachrome tautomerase
1653	DDX1	DEAD (Asp-Glu-Ala-Asp) box polypeptide 1
1654	DDX3X	DEAD (Asp-Glu-Ala-Asp) box polypeptide 3, X-linked
1655	DDX5	DEAD (Asp-Glu-Ala-Asp) box polypeptide 5
1656	DDX6	DEAD (Asp-Glu-Ala-Asp) box polypeptide 6
1657	DMXL1	Dmx-like 1
1659	DHX8	DEAH (Asp-Glu-Ala-His) box polypeptide 8
1660	DHX9	DEAH (Asp-Glu-Ala-His) box polypeptide 9
1662	DDX10	DEAD (Asp-Glu-Ala-Asp) box polypeptide 10
1663	DDX11	DEAD/H (Asp-Glu-Ala-Asp/His) box polypeptide 11 (CHL1-like helicase homolog, S. cerevisiae)
1665	DHX15	DEAH (Asp-Glu-Ala-His) box polypeptide 15
1666	DECR1	2,4-dienoyl CoA reductase 1, mitochondrial
1668	DEFA3	defensin, alpha 3, neutrophil-specific
1674	DES	desmin
1676	DFFA	DNA fragmentation factor, 45kDa, alpha polypeptide
1677	DFFB	DNA fragmentation factor, 40kDa, beta polypeptide (caspase-activated DNase)
1678	TIMM8A	translocase of inner mitochondrial membrane 8 homolog A (yeast)
1687	DFNA5	deafness, autosomal dominant 5
1716	DGUOK	deoxyguanosine kinase
1717	DHCR7	7-dehydrocholesterol reductase
1719	DHFR	dihydrofolate reductase
1723	DHODH	dihydroorotate dehydrogenase
1725	DHPS	deoxyhypusine synthase
1727	CYB5R3	cytochrome b5 reductase 3
1728	NQO1	NAD(P)H dehydrogenase, quinone 1
1729	DIAPH1	diaphanous homolog 1 (Drosophila)
1730	DIAPH2	diaphanous homolog 2 (Drosophila)
1731	SEPT1	septin 1
1733	DIO1	deiodinase, iodothyronine, type I
1735	DIO3	deiodinase, iodothyronine, type III
1736	DKC1	dyskeratosis congenita 1, dyskerin
1737	DLAT	dihydrolipoamide S-acetyltransferase
1738	DLD	dihydrolipoamide dehydrogenase
1739	DLG1	discs, large homolog 1 (Drosophila)
1740	DLG2	discs, large homolog 2 (Drosophila)
1741	DLG3	discs, large homolog 3 (Drosophila)
1742	DLG4	discs, large homolog 4 (Drosophila)
1743	DLST	dihydrolipoamide S-succinyltransferase (E2 component of 2-oxo-glutarate complex)
1748	DLX4	distal-less homeobox 4
1755	DMBT1	deleted in malignant brain tumors 1
1756	DMD	dystrophin
1759	DNM1	dynamin 1
1760	DMPK	dystrophia myotonica-protein kinase
1763	DNA2	DNA replication helicase 2 homolog (yeast)
1767	DNAH5	dynein, axonemal, heavy chain 5
1768	DNAH6	dynein, axonemal, heavy chain 6
1769	DNAH8	dynein, axonemal, heavy chain 8
1770	DNAH9	dynein, axonemal, heavy chain 9
1776	DNASE1L3	deoxyribonuclease I-like 3
1778	DYNC1H1	dynein, cytoplasmic 1, heavy chain 1
1780	DYNC1I1	dynein, cytoplasmic 1, intermediate chain 1
1781	DYNC1I2	dynein, cytoplasmic 1, intermediate chain 2
1783	DYNC1LI2	dynein, cytoplasmic 1, light intermediate chain 2
1785	DNM2	dynamin 2
1786	DNMT1	DNA (cytosine-5-)-methyltransferase 1
1787	TRDMT1	tRNA aspartic acid methyltransferase 1
1788	DNMT3A	DNA (cytosine-5-)-methyltransferase 3 alpha
1791	DNTT	deoxynucleotidyltransferase, terminal
1793	DOCK1	dedicator of cytokinesis 1
1794	DOCK2	dedicator of cytokinesis 2
1795	DOCK3	dedicator of cytokinesis 3
1796	DOK1	docking protein 1, 62kDa (downstream of tyrosine kinase 1)
1797	DOM3Z	dom-3 homolog Z (C. elegans)
1800	DPEP1	dipeptidase 1 (renal)
1802	DPH2	DPH2 homolog (S. cerevisiae)
1803	DPP4	dipeptidyl-peptidase 4
1804	DPP6	dipeptidyl-peptidase 6
1806	DPYD	dihydropyrimidine dehydrogenase
1807	DPYS	dihydropyrimidinase
1808	DPYSL2	dihydropyrimidinase-like 2
1809	DPYSL3	dihydropyrimidinase-like 3
1812	DRD1	dopamine receptor D1
1814	DRD3	dopamine receptor D3
1816	DRD5	dopamine receptor D5
1819	DRG2	developmentally regulated GTP binding protein 2
1820	ARID3A	AT rich interactive domain 3A (BRIGHT-like)
1822	ATN1	atrophin 1
1824	DSC2	desmocollin 2
1825	DSC3	desmocollin 3
1826	DSCAM	Down syndrome cell adhesion molecule
1827	RCAN1	regulator of calcineurin 1
1828	DSG1	desmoglein 1
1829	DSG2	desmoglein 2
1831	TSC22D3	TSC22 domain family, member 3
1832	DSP	desmoplakin
1834	DSPP	dentin sialophosphoprotein
1837	DTNA	dystrobrevin, alpha
1838	DTNB	dystrobrevin, beta
1841	DTYMK	deoxythymidylate kinase (thymidylate kinase)
1842	ECM2	extracellular matrix protein 2, female organ and adipocyte specific
1843	DUSP1	dual specificity phosphatase 1
1845	DUSP3	dual specificity phosphatase 3
1848	DUSP6	dual specificity phosphatase 6
1850	DUSP8	dual specificity phosphatase 8
1852	DUSP9	dual specificity phosphatase 9
1854	DUT	deoxyuridine triphosphatase
1855	DVL1	dishevelled, dsh homolog 1 (Drosophila)
1856	DVL2	dishevelled, dsh homolog 2 (Drosophila)
1857	DVL3	dishevelled, dsh homolog 3 (Drosophila)
1859	DYRK1A	dual-specificity tyrosine-(Y)-phosphorylation regulated kinase 1A
1869	E2F1	E2F transcription factor 1
1870	E2F2	E2F transcription factor 2
1871	E2F3	E2F transcription factor 3
1874	E2F4	E2F transcription factor 4, p107/p130-binding
1877	E4F1	E4F transcription factor 1
1880	GPR183	G protein-coupled receptor 183
1889	ECE1	endothelin converting enzyme 1
1890	TYMP	thymidine phosphorylase
1891	ECH1	enoyl Coenzyme A hydratase 1, peroxisomal
1892	ECHS1	enoyl Coenzyme A hydratase, short chain, 1, mitochondrial
1893	ECM1	extracellular matrix protein 1
1894	ECT2	epithelial cell transforming sequence 2 oncogene
1906	EDN1	endothelin 1
1912	PHC2	polyhomeotic homolog 2 (Drosophila)
1915	EEF1A1	eukaryotic translation elongation factor 1 alpha 1
1917	EEF1A2	eukaryotic translation elongation factor 1 alpha 2
1933	EEF1B2	eukaryotic translation elongation factor 1 beta 2
1936	EEF1D	eukaryotic translation elongation factor 1 delta (guanine nucleotide exchange protein)
1937	EEF1G	eukaryotic translation elongation factor 1 gamma
1938	EEF2	eukaryotic translation elongation factor 2
1939	LGTN	ligatin
1945	EFNA4	ephrin-A4
1947	EFNB1	ephrin-B1
1952	CELSR2	cadherin, EGF LAG seven-pass G-type receptor 2 (flamingo homolog, Drosophila)
1953	MEGF6	multiple EGF-like-domains 6
1954	MEGF8	multiple EGF-like-domains 8
1956	EGFR	epidermal growth factor receptor (erythroblastic leukemia viral (v-erb-b) oncogene homolog, avian)
1959	EGR2	early growth response 2
1962	EHHADH	enoyl-Coenzyme A, hydratase/3-hydroxyacyl Coenzyme A dehydrogenase
1964	EIF1AX	eukaryotic translation initiation factor 1A, X-linked
1965	EIF2S1	eukaryotic translation initiation factor 2, subunit 1 alpha, 35kDa
1967	EIF2B1	eukaryotic translation initiation factor 2B, subunit 1 alpha, 26kDa
1968	EIF2S3	eukaryotic translation initiation factor 2, subunit 3 gamma, 52kDa
1969	EPHA2	EPH receptor A2
1973	EIF4A1	eukaryotic translation initiation factor 4A, isoform 1
1974	EIF4A2	eukaryotic translation initiation factor 4A, isoform 2
1975	EIF4B	eukaryotic translation initiation factor 4B
1977	EIF4E	eukaryotic translation initiation factor 4E
1981	EIF4G1	eukaryotic translation initiation factor 4 gamma, 1
1982	EIF4G2	eukaryotic translation initiation factor 4 gamma, 2
1983	EIF5	eukaryotic translation initiation factor 5
1984	EIF5A	eukaryotic translation initiation factor 5A
1991	ELANE	elastase, neutrophil expressed
1992	SERPINB1	serpin peptidase inhibitor, clade B (ovalbumin), member 1
1993	ELAVL2	ELAV (embryonic lethal, abnormal vision, Drosophila)-like 2 (Hu antigen B)
1994	ELAVL1	ELAV (embryonic lethal, abnormal vision, Drosophila)-like 1 (Hu antigen R)
1995	ELAVL3	ELAV (embryonic lethal, abnormal vision, Drosophila)-like 3 (Hu antigen C)
1996	ELAVL4	ELAV (embryonic lethal, abnormal vision, Drosophila)-like 4 (Hu antigen D)
1997	ELF1	E74-like factor 1 (ets domain transcription factor)
1998	ELF2	E74-like factor 2 (ets domain transcription factor)
2000	ELF4	E74-like factor 4 (ets domain transcription factor)
2001	ELF5	E74-like factor 5 (ets domain transcription factor)
2002	ELK1	ELK1, member of ETS oncogene family
2005	ELK4	ELK4, ETS-domain protein (SRF accessory protein 1)
2006	ELN	elastin
2009	EML1	echinoderm microtubule associated protein like 1
2010	EMD	emerin
2011	MARK2	MAP/microtubule affinity-regulating kinase 2
2015	EMR1	egf-like module containing, mucin-like, hormone receptor-like 1
2016	EMX1	empty spiracles homeobox 1
2017	CTTN	cortactin
2021	ENDOG	endonuclease G
2022	ENG	endoglin
2023	ENO1	enolase 1, (alpha)
2026	ENO2	enolase 2 (gamma, neuronal)
2027	ENO3	enolase 3 (beta, muscle)
2029	ENSA	endosulfine alpha
2033	EP300	E1A binding protein p300
2034	EPAS1	endothelial PAS domain protein 1
2035	EPB41	erythrocyte membrane protein band 4.1 (elliptocytosis 1, RH-linked)
2036	EPB41L1	erythrocyte membrane protein band 4.1-like 1
2037	EPB41L2	erythrocyte membrane protein band 4.1-like 2
2038	EPB42	erythrocyte membrane protein band 4.2
2039	EPB49	erythrocyte membrane protein band 4.9 (dematin)
2040	STOM	stomatin
2041	EPHA1	EPH receptor A1
2042	EPHA3	EPH receptor A3
2043	EPHA4	EPH receptor A4
2044	EPHA5	EPH receptor A5
2046	EPHA8	EPH receptor A8
2049	EPHB3	EPH receptor B3
2050	EPHB4	EPH receptor B4
2051	EPHB6	EPH receptor B6
2052	EPHX1	epoxide hydrolase 1, microsomal (xenobiotic)
2053	EPHX2	epoxide hydrolase 2, cytoplasmic
2054	STX2	syntaxin 2
2056	EPO	erythropoietin
2057	EPOR	erythropoietin receptor
2058	EPRS	glutamyl-prolyl-tRNA synthetase
2059	EPS8	epidermal growth factor receptor pathway substrate 8
2060	EPS15	epidermal growth factor receptor pathway substrate 15
2063	NR2F6	nuclear receptor subfamily 2, group F, member 6
2064	ERBB2	v-erb-b2 erythroblastic leukemia viral oncogene homolog 2, neuro/glioblastoma derived oncogene homolog (avian)
2066	ERBB4	v-erb-a erythroblastic leukemia viral oncogene homolog 4 (avian)
2067	ERCC1	excision repair cross-complementing rodent repair deficiency, complementation group 1 (includes overlapping antisense sequence)
2068	ERCC2	excision repair cross-complementing rodent repair deficiency, complementation group 2
2070	EYA4	eyes absent homolog 4 (Drosophila)
2071	ERCC3	excision repair cross-complementing rodent repair deficiency, complementation group 3 (xeroderma pigmentosum group B complementing)
2072	ERCC4	excision repair cross-complementing rodent repair deficiency, complementation group 4
2073	ERCC5	excision repair cross-complementing rodent repair deficiency, complementation group 5
2074	ERCC6	excision repair cross-complementing rodent repair deficiency, complementation group 6
2077	ERF	Ets2 repressor factor
2079	ERH	enhancer of rudimentary homolog (Drosophila)
2081	ERN1	endoplasmic reticulum to nucleus signaling 1
2091	FBL	fibrillarin
2098	ESD	esterase D/formylglutathione hydrolase
2099	ESR1	estrogen receptor 1
2100	ESR2	estrogen receptor 2 (ER beta)
2101	ESRRA	estrogen-related receptor alpha
2104	ESRRG	estrogen-related receptor gamma
2107	ETF1	eukaryotic translation termination factor 1
2108	ETFA	electron-transfer-flavoprotein, alpha polypeptide
2109	ETFB	electron-transfer-flavoprotein, beta polypeptide
2110	ETFDH	electron-transferring-flavoprotein dehydrogenase
2113	ETS1	v-ets erythroblastosis virus E26 oncogene homolog 1 (avian)
2114	ETS2	v-ets erythroblastosis virus E26 oncogene homolog 2 (avian)
2116	ETV2	ets variant 2
2117	ETV3	ets variant 3
2118	ETV4	ets variant 4
2120	ETV6	ets variant 6
2121	EVC	Ellis van Creveld syndrome
2122	EVI1	ecotropic viral integration site 1
2125	EVPL	envoplakin
2128	EVX1	even-skipped homeobox 1
2130	EWSR1	Ewing sarcoma breakpoint region 1
2132	EXT2	exostoses (multiple) 2
2134	EXTL1	exostoses (multiple)-like 1
2137	EXTL3	exostoses (multiple)-like 3
2140	EYA3	eyes absent homolog 3 (Drosophila)
2145	EZH1	enhancer of zeste homolog 1 (Drosophila)
2146	EZH2	enhancer of zeste homolog 2 (Drosophila)
2147	F2	coagulation factor II (thrombin)
2150	F2RL1	coagulation factor II (thrombin) receptor-like 1
2152	F3	coagulation factor III (thromboplastin, tissue factor)
2153	F5	coagulation factor V (proaccelerin, labile factor)
2157	F8	coagulation factor VIII, procoagulant component
2158	F9	coagulation factor IX
2162	F13A1	coagulation factor XIII, A1 polypeptide
2165	F13B	coagulation factor XIII, B polypeptide
2166	FAAH	fatty acid amide hydrolase
2167	FABP4	fatty acid binding protein 4, adipocyte
2168	FABP1	fatty acid binding protein 1, liver
2170	FABP3	fatty acid binding protein 3, muscle and heart (mammary-derived growth inhibitor)
2171	FABP5	fatty acid binding protein 5 (psoriasis-associated)
2173	FABP7	fatty acid binding protein 7, brain
2175	FANCA	Fanconi anemia, complementation group A
2176	FANCC	Fanconi anemia, complementation group C
2177	FANCD2	Fanconi anemia, complementation group D2
2178	FANCE	Fanconi anemia, complementation group E
2180	ACSL1	acyl-CoA synthetase long-chain family member 1
2182	ACSL4	acyl-CoA synthetase long-chain family member 4
2185	PTK2B	PTK2B protein tyrosine kinase 2 beta
2186	BPTF	bromodomain PHD finger transcription factor
2187	FANCB	Fanconi anemia, complementation group B
2188	FANCF	Fanconi anemia, complementation group F
2189	FANCG	Fanconi anemia, complementation group G
2191	FAP	fibroblast activation protein, alpha
2192	FBLN1	fibulin 1
2193	FARSA	phenylalanyl-tRNA synthetase, alpha subunit
2194	FASN	fatty acid synthase
2195	FAT1	FAT tumor suppressor homolog 1 (Drosophila)
2196	FAT2	FAT tumor suppressor homolog 2 (Drosophila)
2197	FAU	Finkel-Biskis-Reilly murine sarcoma virus (FBR-MuSV) ubiquitously expressed
2199	FBLN2	fibulin 2
2200	FBN1	fibrillin 1
2201	FBN2	fibrillin 2
2203	FBP1	fructose-1,6-bisphosphatase 1
2204	FCAR	Fc fragment of IgA, receptor for
2217	FCGRT	Fc fragment of IgG, receptor, transporter, alpha
2219	FCN1	ficolin (collagen/fibrinogen domain containing) 1
2220	FCN2	ficolin (collagen/fibrinogen domain containing lectin) 2 (hucolin)
2222	FDFT1	farnesyl-diphosphate farnesyltransferase 1
2224	FDPS	farnesyl diphosphate synthase (farnesyl pyrophosphate synthetase, dimethylallyltranstransferase, geranyltranstransferase)
2232	FDXR	ferredoxin reductase
2235	FECH	ferrochelatase (protoporphyria)
2237	FEN1	flap structure-specific endonuclease 1
2239	GPC4	glypican 4
2241	FER	fer (fps/fes related) tyrosine kinase
2242	FES	feline sarcoma oncogene
2243	FGA	fibrinogen alpha chain
2244	FGB	fibrinogen beta chain
2245	FGD1	FYVE, RhoGEF and PH domain containing 1
2247	FGF2	fibroblast growth factor 2 (basic)
2248	FGF3	fibroblast growth factor 3 (murine mammary tumor virus integration site (v-int-2) oncogene homolog)
2249	FGF4	fibroblast growth factor 4
2250	FGF5	fibroblast growth factor 5
2251	FGF6	fibroblast growth factor 6
2253	FGF8	fibroblast growth factor 8 (androgen-induced)
2260	FGFR1	fibroblast growth factor receptor 1
2261	FGFR3	fibroblast growth factor receptor 3
2262	GPC5	glypican 5
2263	FGFR2	fibroblast growth factor receptor 2
2266	FGG	fibrinogen gamma chain
2268	FGR	Gardner-Rasheed feline sarcoma viral (v-fgr) oncogene homolog
2271	FH	fumarate hydratase
2272	FHIT	fragile histidine triad gene
2274	FHL2	four and a half LIM domains 2
2275	FHL3	four and a half LIM domains 3
2280	FKBP1A	FK506 binding protein 1A, 12kDa
2287	FKBP3	FK506 binding protein 3, 25kDa
2288	FKBP4	FK506 binding protein 4, 59kDa
2289	FKBP5	FK506 binding protein 5
2290	FOXG1	forkhead box G1
2294	FOXF1	forkhead box F1
2296	FOXC1	forkhead box C1
2305	FOXM1	forkhead box M1
2306	FOXD2	forkhead box D2
2308	FOXO1	forkhead box O1
2309	FOXO3	forkhead box O3
2312	FLG	filaggrin
2313	FLI1	Friend leukemia virus integration 1
2314	FLII	flightless I homolog (Drosophila)
2316	FLNA	filamin A, alpha (actin binding protein 280)
2317	FLNB	filamin B, beta (actin binding protein 278)
2318	FLNC	filamin C, gamma (actin binding protein 280)
2319	FLOT2	flotillin 2
2321	FLT1	fms-related tyrosine kinase 1 (vascular endothelial growth factor/vascular permeability factor receptor)
2322	FLT3	fms-related tyrosine kinase 3
2326	FMO1	flavin containing monooxygenase 1
2329	FMO4	flavin containing monooxygenase 4
2330	FMO5	flavin containing monooxygenase 5
2332	FMR1	fragile X mental retardation 1
2334	AFF2	AF4/FMR2 family, member 2
2335	FN1	fibronectin 1
2339	FNTA	farnesyltransferase, CAAX box, alpha
2342	FNTB	farnesyltransferase, CAAX box, beta
2346	FOLH1	folate hydrolase (prostate-specific membrane antigen) 1
2348	FOLR1	folate receptor 1 (adult)
2355	FOSL2	FOS-like antigen 2
2395	FXN	frataxin
2475	MTOR	mechanistic target of rapamycin (serine/threonine kinase)
2483	FRG1	FSHD region gene 1
2491	CENPI	centromere protein I
2492	FSHR	follicle stimulating hormone receptor
2494	NR5A2	nuclear receptor subfamily 5, group A, member 2
2495	FTH1	ferritin, heavy polypeptide 1
2512	FTL	ferritin, light polypeptide
2516	NR5A1	nuclear receptor subfamily 5, group A, member 1
2517	FUCA1	fucosidase, alpha-L- 1, tissue
2520	GAST	gastrin
2521	FUS	fusion (involved in t(12;16) in malignant liposarcoma)
2530	FUT8	fucosyltransferase 8 (alpha (1,6) fucosyltransferase)
2533	FYB	FYN binding protein (FYB-120/130)
2535	FZD2	frizzled homolog 2 (Drosophila)
2539	G6PD	glucose-6-phosphate dehydrogenase
2547	XRCC6	X-ray repair complementing defective repair in Chinese hamster cells 6
2548	GAA	glucosidase, alpha; acid
2549	GAB1	GRB2-associated binding protein 1
2551	GABPA	GA binding protein transcription factor, alpha subunit 60kDa
2553	GABPB1	GA binding protein transcription factor, beta subunit 1
2555	GABRA2	gamma-aminobutyric acid (GABA) A receptor, alpha 2
2556	GABRA3	gamma-aminobutyric acid (GABA) A receptor, alpha 3
2557	GABRA4	gamma-aminobutyric acid (GABA) A receptor, alpha 4
2560	GABRB1	gamma-aminobutyric acid (GABA) A receptor, beta 1
2561	GABRB2	gamma-aminobutyric acid (GABA) A receptor, beta 2
2564	GABRE	gamma-aminobutyric acid (GABA) A receptor, epsilon
2565	GABRG1	gamma-aminobutyric acid (GABA) A receptor, gamma 1
2567	GABRG3	gamma-aminobutyric acid (GABA) A receptor, gamma 3
2569	GABRR1	gamma-aminobutyric acid (GABA) receptor, rho 1
2580	GAK	cyclin G associated kinase
2582	GALE	UDP-galactose-4-epimerase
2584	GALK1	galactokinase 1
2585	GALK2	galactokinase 2
2590	GALNT2	UDP-N-acetyl-alpha-D-galactosamine:polypeptide N-acetylgalactosaminyltransferase 2 (GalNAc-T2)
2592	GALT	galactose-1-phosphate uridylyltransferase
2593	GAMT	guanidinoacetate N-methyltransferase
2597	GAPDH	glyceraldehyde-3-phosphate dehydrogenase
2617	GARS	glycyl-tRNA synthetase
2618	GART	phosphoribosylglycinamide formyltransferase, phosphoribosylglycinamide synthetase, phosphoribosylaminoimidazole synthetase
2625	GATA3	GATA binding protein 3
2627	GATA6	GATA binding protein 6
2628	GATM	glycine amidinotransferase (L-arginine:glycine amidinotransferase)
2631	GBAS	glioblastoma amplified sequence
2632	GBE1	glucan (1,4-alpha-), branching enzyme 1
2633	GBP1	guanylate binding protein 1, interferon-inducible, 67kDa
2634	GBP2	guanylate binding protein 2, interferon-inducible
2638	GC	group-specific component (vitamin D binding protein)
2639	GCDH	glutaryl-Coenzyme A dehydrogenase
2643	GCH1	GTP cyclohydrolase 1
2644	GCHFR	GTP cyclohydrolase I feedback regulator
2646	GCKR	glucokinase (hexokinase 4) regulator
2647	BLOC1S1	biogenesis of lysosomal organelles complex-1, subunit 1
2648	KAT2A	K(lysine) acetyltransferase 2A
2658	GDF2	growth differentiation factor 2
2661	GDF9	growth differentiation factor 9
2664	GDI1	GDP dissociation inhibitor 1
2665	GDI2	GDP dissociation inhibitor 2
2670	GFAP	glial fibrillary acidic protein
2671	GFER	growth factor, augmenter of liver regeneration
2672	GFI1	growth factor independent 1 transcription repressor
2673	GFPT1	glutamine-fructose-6-phosphate transaminase 1
2677	GGCX	gamma-glutamyl carboxylase
2690	GHR	growth hormone receptor
2693	GHSR	growth hormone secretagogue receptor
2712	GK2	glycerol kinase 2
2717	GLA	galactosidase, alpha
2720	GLB1	galactosidase, beta 1
2729	GCLC	glutamate-cysteine ligase, catalytic subunit
2730	GCLM	glutamate-cysteine ligase, modifier subunit
2731	GLDC	glycine dehydrogenase (decarboxylating)
2733	GLE1	GLE1 RNA export mediator homolog (yeast)
2734	GLG1	golgi apparatus protein 1
2735	GLI1	GLI family zinc finger 1
2736	GLI2	GLI family zinc finger 2
2737	GLI3	GLI family zinc finger 3
2739	GLO1	glyoxalase I
2744	GLS	glutaminase
2745	GLRX	glutaredoxin (thioltransferase)
2746	GLUD1	glutamate dehydrogenase 1
2747	GLUD2	glutamate dehydrogenase 2
2752	GLUL	glutamate-ammonia ligase (glutamine synthetase)
2762	GMDS	GDP-mannose 4,6-dehydratase
2768	GNA12	guanine nucleotide binding protein (G protein) alpha 12
2770	GNAI1	guanine nucleotide binding protein (G protein), alpha inhibiting activity polypeptide 1
2771	GNAI2	guanine nucleotide binding protein (G protein), alpha inhibiting activity polypeptide 2
2773	GNAI3	guanine nucleotide binding protein (G protein), alpha inhibiting activity polypeptide 3
2774	GNAL	guanine nucleotide binding protein (G protein), alpha activating activity polypeptide, olfactory type
2775	GNAO1	guanine nucleotide binding protein (G protein), alpha activating activity polypeptide O
2776	GNAQ	guanine nucleotide binding protein (G protein), q polypeptide
2778	GNAS	GNAS complex locus
2779	GNAT1	guanine nucleotide binding protein (G protein), alpha transducing activity polypeptide 1
2782	GNB1	guanine nucleotide binding protein (G protein), beta polypeptide 1
2783	GNB2	guanine nucleotide binding protein (G protein), beta polypeptide 2
2784	GNB3	guanine nucleotide binding protein (G protein), beta polypeptide 3
2791	GNG11	guanine nucleotide binding protein (G protein), gamma 11
2792	GNGT1	guanine nucleotide binding protein (G protein), gamma transducing activity polypeptide 1
2794	GNL1	guanine nucleotide binding protein-like 1
2798	GNRHR	gonadotropin-releasing hormone receptor
2799	GNS	glucosamine (N-acetyl)-6-sulfatase
2800	GOLGA1	golgi autoantigen, golgin subfamily a, 1
2801	GOLGA2	golgi autoantigen, golgin subfamily a, 2
2802	GOLGA3	golgi autoantigen, golgin subfamily a, 3
2803	GOLGA4	golgi autoantigen, golgin subfamily a, 4
2804	GOLGB1	golgin B1, golgi integral membrane protein
2805	GOT1	glutamic-oxaloacetic transaminase 1, soluble (aspartate aminotransferase 1)
2806	GOT2	glutamic-oxaloacetic transaminase 2, mitochondrial (aspartate aminotransferase 2)
2810	SFN	stratifin
2811	GP1BA	glycoprotein Ib (platelet), alpha polypeptide
2814	GP5	glycoprotein V (platelet)
2817	GPC1	glypican 1
2821	GPI	glucose phosphate isomerase
2822	GPLD1	glycosylphosphatidylinositol specific phospholipase D1
2824	GPM6B	glycoprotein M6B
2842	GPR19	G protein-coupled receptor 19
2844	GPR21	G protein-coupled receptor 21
2845	GPR22	G protein-coupled receptor 22
2848	GPR25	G protein-coupled receptor 25
2852	GPER	G protein-coupled estrogen receptor 1
2863	GPR39	G protein-coupled receptor 39
2869	GRK5	G protein-coupled receptor kinase 5
2872	MKNK2	MAP kinase interacting serine/threonine kinase 2
2873	GPS1	G protein pathway suppressor 1
2874	GPS2	G protein pathway suppressor 2
2876	GPX1	glutathione peroxidase 1
2879	GPX4	glutathione peroxidase 4 (phospholipid hydroperoxidase)
2882	GPX7	glutathione peroxidase 7
2885	GRB2	growth factor receptor-bound protein 2
2886	GRB7	growth factor receptor-bound protein 7
2887	GRB10	growth factor receptor-bound protein 10
2889	RAPGEF1	Rap guanine nucleotide exchange factor (GEF) 1
2890	GRIA1	glutamate receptor, ionotropic, AMPA 1
2893	GRIA4	glutamate receptor, ionotrophic, AMPA 4
2894	GRID1	glutamate receptor, ionotropic, delta 1
2895	GRID2	glutamate receptor, ionotropic, delta 2
2896	GRN	granulin
2897	GRIK1	glutamate receptor, ionotropic, kainate 1
2899	GRIK3	glutamate receptor, ionotropic, kainate 3
2900	GRIK4	glutamate receptor, ionotropic, kainate 4
2903	GRIN2A	glutamate receptor, ionotropic, N-methyl D-aspartate 2A
2906	GRIN2D	glutamate receptor, ionotropic, N-methyl D-aspartate 2D
2908	NR3C1	nuclear receptor subfamily 3, group C, member 1 (glucocorticoid receptor)
2909	GRLF1	glucocorticoid receptor DNA binding factor 1
2911	GRM1	glutamate receptor, metabotropic 1
2921	CXCL3	chemokine (C-X-C motif) ligand 3
2923	PDIA3	protein disulfide isomerase family A, member 3
2926	GRSF1	G-rich RNA sequence binding factor 1
2931	GSK3A	glycogen synthase kinase 3 alpha
2932	GSK3B	glycogen synthase kinase 3 beta
2934	GSN	gelsolin (amyloidosis, Finnish type)
2935	GSPT1	G1 to S phase transition 1
2936	GSR	glutathione reductase
2937	GSS	glutathione synthetase
2939	GSTA2	glutathione S-transferase alpha 2
2940	GSTA3	glutathione S-transferase alpha 3
2944	GSTM1	glutathione S-transferase mu 1
2946	GSTM2	glutathione S-transferase mu 2 (muscle)
2947	GSTM3	glutathione S-transferase mu 3 (brain)
2948	GSTM4	glutathione S-transferase mu 4
2949	GSTM5	glutathione S-transferase mu 5
2950	GSTP1	glutathione S-transferase pi 1
2952	GSTT1	glutathione S-transferase theta 1
2956	MSH6	mutS homolog 6 (E. coli)
2957	GTF2A1	general transcription factor IIA, 1, 19/37kDa
2958	GTF2A2	general transcription factor IIA, 2, 12kDa
2959	GTF2B	general transcription factor IIB
2960	GTF2E1	general transcription factor IIE, polypeptide 1, alpha 56kDa
2961	GTF2E2	general transcription factor IIE, polypeptide 2, beta 34kDa
2962	GTF2F1	general transcription factor IIF, polypeptide 1, 74kDa
2963	GTF2F2	general transcription factor IIF, polypeptide 2, 30kDa
2965	GTF2H1	general transcription factor IIH, polypeptide 1, 62kDa
2966	GTF2H2	general transcription factor IIH, polypeptide 2, 44kDa
2967	GTF2H3	general transcription factor IIH, polypeptide 3, 34kDa
2968	GTF2H4	general transcription factor IIH, polypeptide 4, 52kDa
2969	GTF2I	general transcription factor II, i
2971	GTF3A	general transcription factor IIIA
2972	BRF1	BRF1 homolog, subunit of RNA polymerase III transcription initiation factor IIIB (S. cerevisiae)
2975	GTF3C1	general transcription factor IIIC, polypeptide 1, alpha 220kDa
2976	GTF3C2	general transcription factor IIIC, polypeptide 2, beta 110kDa
2977	GUCY1A2	guanylate cyclase 1, soluble, alpha 2
2979	GUCA1B	guanylate cyclase activator 1B (retina)
2983	GUCY1B3	guanylate cyclase 1, soluble, beta 3
2984	GUCY2C	guanylate cyclase 2C (heat stable enterotoxin receptor)
2986	GUCY2F	guanylate cyclase 2F, retinal
2987	GUK1	guanylate kinase 1
2990	GUSB	glucuronidase, beta
2992	GYG1	glycogenin 1
2997	GYS1	glycogen synthase 1 (muscle)
2998	GYS2	glycogen synthase 2 (liver)
3000	GUCY2D	guanylate cyclase 2D, membrane (retina-specific)
3001	GZMA	granzyme A (granzyme 1, cytotoxic T-lymphocyte-associated serine esterase 3)
3003	GZMK	granzyme K (granzyme 3; tryptase II)
3005	H1F0	H1 histone family, member 0
3006	HIST1H1C	histone cluster 1, H1c
3007	HIST1H1D	histone cluster 1, H1d
3008	HIST1H1E	histone cluster 1, H1e
3009	HIST1H1B	histone cluster 1, H1b
3010	HIST1H1T	histone cluster 1, H1t
3012	HIST1H2AE	histone cluster 1, H2ae
3013	HIST1H2AD	histone cluster 1, H2ad
3015	H2AFZ	H2A histone family, member Z
3018	HIST1H2BB	histone cluster 1, H2bb
3020	H3F3A	H3 histone, family 3A
3024	HIST1H1A	histone cluster 1, H1a
3026	HABP2	hyaluronan binding protein 2
3028	HSD17B10	hydroxysteroid (17-beta) dehydrogenase 10
3030	HADHA	hydroxyacyl-Coenzyme A dehydrogenase/3-ketoacyl-Coenzyme A thiolase/enoyl-Coenzyme A hydratase (trifunctional protein), alpha subunit
3032	HADHB	hydroxyacyl-Coenzyme A dehydrogenase/3-ketoacyl-Coenzyme A thiolase/enoyl-Coenzyme A hydratase (trifunctional protein), beta subunit
3033	HADH	hydroxyacyl-Coenzyme A dehydrogenase
3034	HAL	histidine ammonia-lyase
3035	HARS	histidyl-tRNA synthetase
3036	HAS1	hyaluronan synthase 1
3052	HCCS	holocytochrome c synthase (cytochrome c heme-lyase)
3053	SERPIND1	serpin peptidase inhibitor, clade D (heparin cofactor), member 1
3054	HCFC1	host cell factor C1 (VP16-accessory protein)
3055	HCK	hemopoietic cell kinase
3064	HTT	huntingtin
3065	HDAC1	histone deacetylase 1
3066	HDAC2	histone deacetylase 2
3068	HDGF	hepatoma-derived growth factor (high-mobility group protein 1-like)
3069	HDLBP	high density lipoprotein binding protein
3070	HELLS	helicase, lymphoid-specific
3071	NCKAP1L	NCK-associated protein 1-like
3073	HEXA	hexosaminidase A (alpha polypeptide)
3074	HEXB	hexosaminidase B (beta polypeptide)
3077	HFE	hemochromatosis
3082	HGF	hepatocyte growth factor (hepapoietin A; scatter factor)
3084	NRG1	neuregulin 1
3087	HHEX	hematopoietically expressed homeobox
3091	HIF1A	hypoxia inducible factor 1, alpha subunit (basic helix-loop-helix transcription factor)
3092	HIP1	huntingtin interacting protein 1
3093	UBE2K	ubiquitin-conjugating enzyme E2K (UBC1 homolog, yeast)
3094	HINT1	histidine triad nucleotide binding protein 1
3096	HIVEP1	human immunodeficiency virus type I enhancer binding protein 1
3097	HIVEP2	human immunodeficiency virus type I enhancer binding protein 2
3098	HK1	hexokinase 1
3099	HK2	hexokinase 2
3101	HK3	hexokinase 3 (white cell)
3104	ZBTB48	zinc finger and BTB domain containing 48
3105	HLA-A	major histocompatibility complex, class I, A
3106	HLA-B	major histocompatibility complex, class I, B
3107	HLA-C	major histocompatibility complex, class I, C
3110	MNX1	motor neuron and pancreas homeobox 1
3112	HLA-DOB	major histocompatibility complex, class II, DO beta
3122	HLA-DRA	major histocompatibility complex, class II, DR alpha
3123	HLA-DRB1	major histocompatibility complex, class II, DR beta 1
3131	HLF	hepatic leukemia factor
3133	HLA-E	major histocompatibility complex, class I, E
3135	HLA-G	major histocompatibility complex, class I, G
3141	HLCS	holocarboxylase synthetase (biotin-(proprionyl-Coenzyme A-carboxylase (ATP-hydrolysing)) ligase)
3146	HMGB1	high-mobility group box 1
3148	HMGB2	high-mobility group box 2
3149	HMGB3	high-mobility group box 3
3150	HMGN1	high-mobility group nucleosome binding domain 1
3156	HMGCR	3-hydroxy-3-methylglutaryl-Coenzyme A reductase
3157	HMGCS1	3-hydroxy-3-methylglutaryl-Coenzyme A synthase 1 (soluble)
3158	HMGCS2	3-hydroxy-3-methylglutaryl-Coenzyme A synthase 2 (mitochondrial)
3159	HMGA1	high mobility group AT-hook 1
3161	HMMR	hyaluronan-mediated motility receptor (RHAMM)
3162	HMOX1	heme oxygenase (decycling) 1
3164	NR4A1	nuclear receptor subfamily 4, group A, member 1
3166	HMX1	H6 family homeobox 1
3169	FOXA1	forkhead box A1
3170	FOXA2	forkhead box A2
3172	HNF4A	hepatocyte nuclear factor 4, alpha
3174	HNF4G	hepatocyte nuclear factor 4, gamma
3176	HNMT	histamine N-methyltransferase
3178	HNRNPA1	heterogeneous nuclear ribonucleoprotein A1
3181	HNRNPA2B1	heterogeneous nuclear ribonucleoprotein A2/B1
3182	HNRNPAB	heterogeneous nuclear ribonucleoprotein A/B
3183	HNRNPC	heterogeneous nuclear ribonucleoprotein C (C1/C2)
3184	HNRNPD	heterogeneous nuclear ribonucleoprotein D (AU-rich element RNA binding protein 1, 37kDa)
3185	HNRNPF	heterogeneous nuclear ribonucleoprotein F
3187	HNRNPH1	heterogeneous nuclear ribonucleoprotein H1 (H)
3188	HNRNPH2	heterogeneous nuclear ribonucleoprotein H2 (H')
3189	HNRNPH3	heterogeneous nuclear ribonucleoprotein H3 (2H9)
3190	HNRNPK	heterogeneous nuclear ribonucleoprotein K
3191	HNRNPL	heterogeneous nuclear ribonucleoprotein L
3192	HNRNPU	heterogeneous nuclear ribonucleoprotein U (scaffold attachment factor A)
3209	HOXA13	homeobox A13
3213	HOXB3	homeobox B3
3214	HOXB4	homeobox B4
3218	HOXB8	homeobox B8
3223	HOXC6	homeobox C6
3225	HOXC9	homeobox C9
3226	HOXC10	homeobox C10
3229	HOXC13	homeobox C13
3232	HOXD3	homeobox D3
3234	HOXD8	homeobox D8
3235	HOXD9	homeobox D9
3236	HOXD10	homeobox D10
3240	HP	haptoglobin
3241	HPCAL1	hippocalcin-like 1
3242	HPD	4-hydroxyphenylpyruvate dioxygenase
3249	HPN	hepsin
3250	HPR	haptoglobin-related protein
3251	HPRT1	hypoxanthine phosphoribosyltransferase 1
3257	HPS1	Hermansky-Pudlak syndrome 1
3263	HPX	hemopexin
3267	AGFG1	ArfGAP with FG repeats 1
3268	AGFG2	ArfGAP with FG repeats 2
3273	HRG	histidine-rich glycoprotein
3274	HRH2	histamine receptor H2
3275	PRMT2	protein arginine methyltransferase 2
3276	PRMT1	protein arginine methyltransferase 1
3283	HSD3B1	hydroxy-delta-5-steroid dehydrogenase, 3 beta- and steroid delta-isomerase 1
3294	HSD17B2	hydroxysteroid (17-beta) dehydrogenase 2
3295	HSD17B4	hydroxysteroid (17-beta) dehydrogenase 4
3297	HSF1	heat shock transcription factor 1
3298	HSF2	heat shock transcription factor 2
3299	HSF4	heat shock transcription factor 4
3300	DNAJB2	DnaJ (Hsp40) homolog, subfamily B, member 2
3301	DNAJA1	DnaJ (Hsp40) homolog, subfamily A, member 1
3303	HSPA1A	heat shock 70kDa protein 1A
3304	HSPA1B	heat shock 70kDa protein 1B
3305	HSPA1L	heat shock 70kDa protein 1-like
3306	HSPA2	heat shock 70kDa protein 2
3308	HSPA4	heat shock 70kDa protein 4
3309	HSPA5	heat shock 70kDa protein 5 (glucose-regulated protein, 78kDa)
3310	HSPA6	heat shock 70kDa protein 6 (HSP70B')
3312	HSPA8	heat shock 70kDa protein 8
3313	HSPA9	heat shock 70kDa protein 9 (mortalin)
3315	HSPB1	heat shock 27kDa protein 1
3320	HSP90AA1	heat shock protein 90kDa alpha (cytosolic), class A member 1
3321	IGSF3	immunoglobulin superfamily, member 3
3326	HSP90AB1	heat shock protein 90kDa alpha (cytosolic), class B member 1
3329	HSPD1	heat shock 60kDa protein 1 (chaperonin)
3336	HSPE1	heat shock 10kDa protein 1 (chaperonin 10)
3337	DNAJB1	DnaJ (Hsp40) homolog, subfamily B, member 1
3338	DNAJC4	DnaJ (Hsp40) homolog, subfamily C, member 4
3339	HSPG2	heparan sulfate proteoglycan 2
3344	FOXN2	forkhead box N2
3347	HTN3	histatin 3
3354	HTR1E	5-hydroxytryptamine (serotonin) receptor 1E
3357	HTR2B	5-hydroxytryptamine (serotonin) receptor 2B
3359	HTR3A	5-hydroxytryptamine (serotonin) receptor 3A
3364	HUS1	HUS1 checkpoint homolog (S. pombe)
3371	TNC	tenascin C
3376	IARS	isoleucyl-tRNA synthetase
3382	ICA1	islet cell autoantigen 1, 69kDa
3383	ICAM1	intercellular adhesion molecule 1
3385	ICAM3	intercellular adhesion molecule 3
3394	IRF8	interferon regulatory factor 8
3396	ICT1	immature colon carcinoma transcript 1
3397	ID1	inhibitor of DNA binding 1, dominant negative helix-loop-helix protein
3399	ID3	inhibitor of DNA binding 3, dominant negative helix-loop-helix protein
3416	IDE	insulin-degrading enzyme
3417	IDH1	isocitrate dehydrogenase 1 (NADP+), soluble
3418	IDH2	isocitrate dehydrogenase 2 (NADP+), mitochondrial
3419	IDH3A	isocitrate dehydrogenase 3 (NAD+) alpha
3420	IDH3B	isocitrate dehydrogenase 3 (NAD+) beta
3421	IDH3G	isocitrate dehydrogenase 3 (NAD+) gamma
3422	IDI1	isopentenyl-diphosphate delta isomerase 1
3423	IDS	iduronate 2-sulfatase
3426	CFI	complement factor I
3428	IFI16	interferon, gamma-inducible protein 16
3430	IFI35	interferon-induced protein 35
3431	SP110	SP110 nuclear body protein
3434	IFIT1	interferon-induced protein with tetratricopeptide repeats 1
3437	IFIT3	interferon-induced protein with tetratricopeptide repeats 3
3440	IFNA2	interferon, alpha 2
3448	IFNA14	interferon, alpha 14
3452	IFNA21	interferon, alpha 21
3475	IFRD1	interferon-related developmental regulator 1
3476	IGBP1	immunoglobulin (CD79A) binding protein 1
3480	IGF1R	insulin-like growth factor 1 receptor
3482	IGF2R	insulin-like growth factor 2 receptor
3483	IGFALS	insulin-like growth factor binding protein, acid labile subunit
3484	IGFBP1	insulin-like growth factor binding protein 1
3486	IGFBP3	insulin-like growth factor binding protein 3
3516	RBPJ	recombination signal binding protein for immunoglobulin kappa J region
3550	IK	IK cytokine, down-regulator of HLA II
3551	IKBKB	inhibitor of kappa light polypeptide gene enhancer in B-cells, kinase beta
3553	IL1B	interleukin 1, beta
3554	IL1R1	interleukin 1 receptor, type I
3560	IL2RB	interleukin 2 receptor, beta
3562	IL3	interleukin 3 (colony-stimulating factor, multiple)
3567	IL5	interleukin 5 (colony-stimulating factor, eosinophil)
3569	IL6	interleukin 6 (interferon, beta 2)
3579	IL8RB	interleukin 8 receptor, beta
3587	IL10RA	interleukin 10 receptor, alpha
3593	IL12B	interleukin 12B (natural killer cell stimulatory factor 2, cytotoxic lymphocyte maturation factor 2, p40)
3598	IL13RA2	interleukin 13 receptor, alpha 2
3601	IL15RA	interleukin 15 receptor, alpha
3603	IL16	interleukin 16 (lymphocyte chemoattractant factor)
3606	IL18	interleukin 18 (interferon-gamma-inducing factor)
3607	FOXK2	forkhead box K2
3608	ILF2	interleukin enhancer binding factor 2, 45kDa
3609	ILF3	interleukin enhancer binding factor 3, 90kDa
3611	ILK	integrin-linked kinase
3612	IMPA1	inositol(myo)-1(or 4)-monophosphatase 1
3613	IMPA2	inositol(myo)-1(or 4)-monophosphatase 2
3614	IMPDH1	IMP (inosine monophosphate) dehydrogenase 1
3615	IMPDH2	IMP (inosine monophosphate) dehydrogenase 2
3617	IMPG1	interphotoreceptor matrix proteoglycan 1
3619	INCENP	inner centromere protein antigens 135/155kDa
3621	ING1	inhibitor of growth family, member 1
3622	ING2	inhibitor of growth family, member 2
3628	INPP1	inositol polyphosphate-1-phosphatase
3631	INPP4A	inositol polyphosphate-4-phosphatase, type I, 107kDa
3633	INPP5B	inositol polyphosphate-5-phosphatase, 75kDa
3635	INPP5D	inositol polyphosphate-5-phosphatase, 145kDa
3636	INPPL1	inositol polyphosphate phosphatase-like 1
3642	INSM1	insulinoma-associated 1
3643	INSR	insulin receptor
3645	INSRR	insulin receptor-related receptor
3646	EIF3E	eukaryotic translation initiation factor 3, subunit E
3651	PDX1	pancreatic and duodenal homeobox 1
3652	IPP	intracisternal A particle-promoted polypeptide
3654	IRAK1	interleukin-1 receptor-associated kinase 1
3655	ITGA6	integrin, alpha 6
3656	IRAK2	interleukin-1 receptor-associated kinase 2
3658	IREB2	iron-responsive element binding protein 2
3659	IRF1	interferon regulatory factor 1
3660	IRF2	interferon regulatory factor 2
3661	IRF3	interferon regulatory factor 3
3664	IRF6	interferon regulatory factor 6
3665	IRF7	interferon regulatory factor 7
3667	IRS1	insulin receptor substrate 1
3670	ISL1	ISL LIM homeobox 1
3672	ITGA1	integrin, alpha 1
3675	ITGA3	integrin, alpha 3 (antigen CD49C, alpha 3 subunit of VLA-3 receptor)
3676	ITGA4	integrin, alpha 4 (antigen CD49D, alpha 4 subunit of VLA-4 receptor)
3678	ITGA5	integrin, alpha 5 (fibronectin receptor, alpha polypeptide)
3679	ITGA7	integrin, alpha 7
3680	ITGA9	integrin, alpha 9
3682	ITGAE	integrin, alpha E (antigen CD103, human mucosal lymphocyte antigen 1; alpha polypeptide)
3683	ITGAL	integrin, alpha L (antigen CD11A (p180), lymphocyte function-associated antigen 1; alpha polypeptide)
3684	ITGAM	integrin, alpha M (complement component 3 receptor 3 subunit)
3685	ITGAV	integrin, alpha V (vitronectin receptor, alpha polypeptide, antigen CD51)
3687	ITGAX	integrin, alpha X (complement component 3 receptor 4 subunit)
3688	ITGB1	integrin, beta 1 (fibronectin receptor, beta polypeptide, antigen CD29 includes MDF2, MSK12)
3689	ITGB2	integrin, beta 2 (complement component 3 receptor 3 and 4 subunit)
3690	ITGB3	integrin, beta 3 (platelet glycoprotein IIIa, antigen CD61)
3691	ITGB4	integrin, beta 4
3692	EIF6	eukaryotic translation initiation factor 6
3693	ITGB5	integrin, beta 5
3694	ITGB6	integrin, beta 6
3698	ITIH2	inter-alpha (globulin) inhibitor H2
3699	ITIH3	inter-alpha (globulin) inhibitor H3
3700	ITIH4	inter-alpha (globulin) inhibitor H4 (plasma Kallikrein-sensitive glycoprotein)
3703	STT3A	STT3, subunit of the oligosaccharyltransferase complex, homolog A (S. cerevisiae)
3704	ITPA	inosine triphosphatase (nucleoside triphosphate pyrophosphatase)
3705	ITPK1	inositol 1,3,4-triphosphate 5/6 kinase
3706	ITPKA	inositol 1,4,5-trisphosphate 3-kinase A
3707	ITPKB	inositol 1,4,5-trisphosphate 3-kinase B
3708	ITPR1	inositol 1,4,5-triphosphate receptor, type 1
3713	IVL	involucrin
3714	JAG2	jagged 2
3716	JAK1	Janus kinase 1
3718	JAK3	Janus kinase 3
3720	JARID2	jumonji, AT rich interactive domain 2
3725	JUN	jun oncogene
3726	JUNB	jun B proto-oncogene
3727	JUND	jun D proto-oncogene
3728	JUP	junction plakoglobin
3732	CD82	CD82 molecule
3735	KARS	lysyl-tRNA synthetase
3741	KCNA5	potassium voltage-gated channel, shaker-related subfamily, member 5
3745	KCNB1	potassium voltage-gated channel, Shab-related subfamily, member 1
3747	KCNC2	potassium voltage-gated channel, Shaw-related subfamily, member 2
3749	KCNC4	potassium voltage-gated channel, Shaw-related subfamily, member 4
3751	KCND2	potassium voltage-gated channel, Shal-related subfamily, member 2
3752	KCND3	potassium voltage-gated channel, Shal-related subfamily, member 3
3753	KCNE1	potassium voltage-gated channel, Isk-related family, member 1
3756	KCNH1	potassium voltage-gated channel, subfamily H (eag-related), member 1
3757	KCNH2	potassium voltage-gated channel, subfamily H (eag-related), member 2
3759	KCNJ2	potassium inwardly-rectifying channel, subfamily J, member 2
3760	KCNJ3	potassium inwardly-rectifying channel, subfamily J, member 3
3764	KCNJ8	potassium inwardly-rectifying channel, subfamily J, member 8
3765	KCNJ9	potassium inwardly-rectifying channel, subfamily J, member 9
3767	KCNJ11	potassium inwardly-rectifying channel, subfamily J, member 11
3768	KCNJ12	potassium inwardly-rectifying channel, subfamily J, member 12
3770	KCNJ14	potassium inwardly-rectifying channel, subfamily J, member 14
3775	KCNK1	potassium channel, subfamily K, member 1
3778	KCNMA1	potassium large conductance calcium-activated channel, subfamily M, alpha member 1
3780	KCNN1	potassium intermediate/small conductance calcium-activated channel, subfamily N, member 1
3781	KCNN2	potassium intermediate/small conductance calcium-activated channel, subfamily N, member 2
3782	KCNN3	potassium intermediate/small conductance calcium-activated channel, subfamily N, member 3
3784	KCNQ1	potassium voltage-gated channel, KQT-like subfamily, member 1
3785	KCNQ2	potassium voltage-gated channel, KQT-like subfamily, member 2
3786	KCNQ3	potassium voltage-gated channel, KQT-like subfamily, member 3
3792	KEL	Kell blood group, metallo-endopeptidase
3796	KIF2A	kinesin heavy chain member 2A
3797	KIF3C	kinesin family member 3C
3798	KIF5A	kinesin family member 5A
3799	KIF5B	kinesin family member 5B
3800	KIF5C	kinesin family member 5C
3801	KIFC3	kinesin family member C3
3814	KISS1	KiSS-1 metastasis-suppressor
3815	KIT	v-kit Hardy-Zuckerman 4 feline sarcoma viral oncogene homolog
3820	KLRB1	killer cell lectin-like receptor subfamily B, member 1
3824	KLRD1	killer cell lectin-like receptor subfamily D, member 1
3831	KLC1	kinesin light chain 1
3832	KIF11	kinesin family member 11
3833	KIFC1	kinesin family member C1
3835	KIF22	kinesin family member 22
3836	KPNA1	karyopherin alpha 1 (importin alpha 5)
3837	KPNB1	karyopherin (importin) beta 1
3838	KPNA2	karyopherin alpha 2 (RAG cohort 1, importin alpha 1)
3839	KPNA3	karyopherin alpha 3 (importin alpha 4)
3840	KPNA4	karyopherin alpha 4 (importin alpha 3)
3841	KPNA5	karyopherin alpha 5 (importin alpha 6)
3842	TNPO1	transportin 1
3843	IPO5	importin 5
3845	KRAS	v-Ki-ras2 Kirsten rat sarcoma viral oncogene homolog
3895	KTN1	kinectin 1 (kinesin receptor)
3898	LAD1	ladinin 1
3899	AFF3	AF4/FMR2 family, member 3
3904	LAIR2	leukocyte-associated immunoglobulin-like receptor 2
3908	LAMA2	laminin, alpha 2
3909	LAMA3	laminin, alpha 3
3910	LAMA4	laminin, alpha 4
3911	LAMA5	laminin, alpha 5
3912	LAMB1	laminin, beta 1
3913	LAMB2	laminin, beta 2 (laminin S)
3914	LAMB3	laminin, beta 3
3915	LAMC1	laminin, gamma 1 (formerly LAMB2)
3916	LAMP1	lysosomal-associated membrane protein 1
3918	LAMC2	laminin, gamma 2
3921	RPSA	ribosomal protein SA
3925	STMN1	stathmin 1
3927	LASP1	LIM and SH3 protein 1
3929	LBP	lipopolysaccharide binding protein
3930	LBR	lamin B receptor
3933	LCN1	lipocalin 1 (tear prealbumin)
3934	LCN2	lipocalin 2
3936	LCP1	lymphocyte cytosolic protein 1 (L-plastin)
3937	LCP2	lymphocyte cytosolic protein 2 (SH2 domain containing leukocyte protein of 76kDa)
3938	LCT	lactase
3939	LDHA	lactate dehydrogenase A
3945	LDHB	lactate dehydrogenase B
3948	LDHC	lactate dehydrogenase C
3949	LDLR	low density lipoprotein receptor
3950	LECT2	leukocyte cell-derived chemotaxin 2
3953	LEPR	leptin receptor
3954	LETM1	leucine zipper-EF-hand containing transmembrane protein 1
3955	LFNG	LFNG O-fucosylpeptide 3-beta-N-acetylglucosaminyltransferase
3956	LGALS1	lectin, galactoside-binding, soluble, 1
3958	LGALS3	lectin, galactoside-binding, soluble, 3
3959	LGALS3BP	lectin, galactoside-binding, soluble, 3 binding protein
3963	LGALS7	lectin, galactoside-binding, soluble, 7
3964	LGALS8	lectin, galactoside-binding, soluble, 8
3965	LGALS9	lectin, galactoside-binding, soluble, 9
3973	LHCGR	luteinizing hormone/choriogonadotropin receptor
3975	LHX1	LIM homeobox 1
3977	LIFR	leukemia inhibitory factor receptor alpha
3978	LIG1	ligase I, DNA, ATP-dependent
3980	LIG3	ligase III, DNA, ATP-dependent
3981	LIG4	ligase IV, DNA, ATP-dependent
3983	ABLIM1	actin binding LIM protein 1
3984	LIMK1	LIM domain kinase 1
3985	LIMK2	LIM domain kinase 2
3987	LIMS1	LIM and senescent cell antigen-like domains 1
3992	FADS1	fatty acid desaturase 1
3993	LLGL2	lethal giant larvae homolog 2 (Drosophila)
3996	LLGL1	lethal giant larvae homolog 1 (Drosophila)
3998	LMAN1	lectin, mannose-binding, 1
4000	LMNA	lamin A/C
4001	LMNB1	lamin B1
4008	LMO7	LIM domain 7
4012	LNPEP	leucyl/cystinyl aminopeptidase
4013	VWA5A	von Willebrand factor A domain containing 5A
4015	LOX	lysyl oxidase
4016	LOXL1	lysyl oxidase-like 1
4017	LOXL2	lysyl oxidase-like 2
4018	LPA	lipoprotein, Lp(a)
4023	LPL	lipoprotein lipase
4026	LPP	LIM domain containing preferred translocation partner in lipoma
4033	LRMP	lymphoid-restricted membrane protein
4034	LRCH4	leucine-rich repeats and calponin homology (CH) domain containing 4
4035	LRP1	low density lipoprotein-related protein 1 (alpha-2-macroglobulin receptor)
4036	LRP2	low density lipoprotein-related protein 2
4037	LRP3	low density lipoprotein receptor-related protein 3
4038	LRP4	low density lipoprotein receptor-related protein 4
4040	LRP6	low density lipoprotein receptor-related protein 6
4041	LRP5	low density lipoprotein receptor-related protein 5
4043	LRPAP1	low density lipoprotein receptor-related protein associated protein 1
4045	LSAMP	limbic system-associated membrane protein
4047	LSS	lanosterol synthase (2,3-oxidosqualene-lanosterol cyclase)
4048	LTA4H	leukotriene A4 hydrolase
4052	LTBP1	latent transforming growth factor beta binding protein 1
4053	LTBP2	latent transforming growth factor beta binding protein 2
4056	LTC4S	leukotriene C4 synthase
4057	LTF	lactotransferrin
4058	LTK	leukocyte receptor tyrosine kinase
4059	BCAM	basal cell adhesion molecule (Lutheran blood group)
4063	LY9	lymphocyte antigen 9
4069	LYZ	lysozyme (renal amyloidosis)
4070	TACSTD2	tumor-associated calcium signal transducer 2
4072	EPCAM	epithelial cell adhesion molecule
4076	CAPRIN1	cell cycle associated protein 1
4077	NBR1	neighbor of BRCA1 gene 1
4081	MAB21L1	mab-21-like 1 (C. elegans)
4082	MARCKS	myristoylated alanine-rich protein kinase C substrate
4084	MXD1	MAX dimerization protein 1
4085	MAD2L1	MAD2 mitotic arrest deficient-like 1 (yeast)
4086	SMAD1	SMAD family member 1
4087	SMAD2	SMAD family member 2
4088	SMAD3	SMAD family member 3
4089	SMAD4	SMAD family member 4
4090	SMAD5	SMAD family member 5
4091	SMAD6	SMAD family member 6
4092	SMAD7	SMAD family member 7
4093	SMAD9	SMAD family member 9
4094	MAF	v-maf musculoaponeurotic fibrosarcoma oncogene homolog (avian)
4099	MAG	myelin associated glycoprotein
4100	MAGEA1	melanoma antigen family A, 1 (directs expression of antigen MZ2-E)
4102	MAGEA3	melanoma antigen family A, 3
4110	MAGEA11	melanoma antigen family A, 11
4112	MAGEB1	melanoma antigen family B, 1
4113	MAGEB2	melanoma antigen family B, 2
4115	MAGEB4	melanoma antigen family B, 4
4117	MAK	male germ cell-associated kinase
4122	MAN2A2	mannosidase, alpha, class 2A, member 2
4123	MAN2C1	mannosidase, alpha, class 2C, member 1
4124	MAN2A1	mannosidase, alpha, class 2A, member 1
4125	MAN2B1	mannosidase, alpha, class 2B, member 1
4126	MANBA	mannosidase, beta A, lysosomal
4128	MAOA	monoamine oxidase A
4129	MAOB	monoamine oxidase B
4130	MAP1A	microtubule-associated protein 1A
4131	MAP1B	microtubule-associated protein 1B
4133	MAP2	microtubule-associated protein 2
4134	MAP4	microtubule-associated protein 4
4135	MAP6	microtubule-associated protein 6
4137	MAPT	microtubule-associated protein tau
4139	MARK1	MAP/microtubule affinity-regulating kinase 1
4140	MARK3	MAP/microtubule affinity-regulating kinase 3
4141	MARS	methionyl-tRNA synthetase
4142	MAS1	MAS1 oncogene
4144	MAT2A	methionine adenosyltransferase II, alpha
4145	MATK	megakaryocyte-associated tyrosine kinase
4146	MATN1	matrilin 1, cartilage matrix protein
4147	MATN2	matrilin 2
4149	MAX	MYC associated factor X
4150	MAZ	MYC-associated zinc finger protein (purine-binding transcription factor)
4151	MB	myoglobin
4152	MBD1	methyl-CpG binding domain protein 1
4153	MBL2	mannose-binding lectin (protein C) 2, soluble (opsonic defect)
4154	MBNL1	muscleblind-like (Drosophila)
4155	MBP	myelin basic protein
4163	MCC	mutated in colorectal cancers
4166	CHST6	carbohydrate (N-acetylglucosamine 6-O) sulfotransferase 6
4168	MCF2	MCF.2 cell line derived transforming sequence
4171	MCM2	minichromosome maintenance complex component 2
4172	MCM3	minichromosome maintenance complex component 3
4173	MCM4	minichromosome maintenance complex component 4
4174	MCM5	minichromosome maintenance complex component 5
4175	MCM6	minichromosome maintenance complex component 6
4176	MCM7	minichromosome maintenance complex component 7
4179	CD46	CD46 molecule, complement regulatory protein
4185	ADAM11	ADAM metallopeptidase domain 11
4188	MDFI	MyoD family inhibitor
4190	MDH1	malate dehydrogenase 1, NAD (soluble)
4191	MDH2	malate dehydrogenase 2, NAD (mitochondrial)
4193	MDM2	Mdm2 p53 binding protein homolog (mouse)
4194	MDM4	Mdm4 p53 binding protein homolog (mouse)
4199	ME1	malic enzyme 1, NADP(+)-dependent, cytosolic
4200	ME2	malic enzyme 2, NAD(+)-dependent, mitochondrial
4201	MEA1	male-enhanced antigen 1
4204	MECP2	methyl CpG binding protein 2 (Rett syndrome)
4205	MEF2A	myocyte enhancer factor 2A
4208	MEF2C	myocyte enhancer factor 2C
4209	MEF2D	myocyte enhancer factor 2D
4210	MEFV	Mediterranean fever
4214	MAP3K1	mitogen-activated protein kinase kinase kinase 1
4215	MAP3K3	mitogen-activated protein kinase kinase kinase 3
4216	MAP3K4	mitogen-activated protein kinase kinase kinase 4
4217	MAP3K5	mitogen-activated protein kinase kinase kinase 5
4218	RAB8A	RAB8A, member RAS oncogene family
4221	MEN1	multiple endocrine neoplasia I
4224	MEP1A	meprin A, alpha (PABA peptide hydrolase)
4225	MEP1B	meprin A, beta
4234	METTL1	methyltransferase like 1
4236	MFAP1	microfibrillar-associated protein 1
4239	MFAP4	microfibrillar-associated protein 4
4241	MFI2	antigen p97 (melanoma associated) identified by monoclonal antibodies 133.2 and 96.5
4245	MGAT1	mannosyl (alpha-1,3-)-glycoprotein beta-1,2-N-acetylglucosaminyltransferase
4246	SCGB2A1	secretoglobin, family 2A, member 1
4248	MGAT3	mannosyl (beta-1,4-)-glycoprotein beta-1,4-N-acetylglucosaminyltransferase
4253	CTAGE5	CTAGE family, member 5
4255	MGMT	O-6-methylguanine-DNA methyltransferase
4256	MGP	matrix Gla protein
4258	MGST2	microsomal glutathione S-transferase 2
4259	MGST3	microsomal glutathione S-transferase 3
4261	CIITA	class II, major histocompatibility complex, transactivator
4277	MICB	MHC class I polypeptide-related sequence B
4281	MID1	midline 1 (Opitz/BBB syndrome)
4282	MIF	macrophage migration inhibitory factor (glycosylation-inhibiting factor)
4285	MIPEP	mitochondrial intermediate peptidase
4286	MITF	microphthalmia-associated transcription factor
4287	ATXN3	ataxin 3
4288	MKI67	antigen identified by monoclonal antibody Ki-67
4289	MKLN1	muskelin 1, intracellular mediator containing kelch motifs
4291	MLF1	myeloid leukemia factor 1
4292	MLH1	mutL homolog 1, colon cancer, nonpolyposis type 2 (E. coli)
4293	MAP3K9	mitogen-activated protein kinase kinase kinase 9
4294	MAP3K10	mitogen-activated protein kinase kinase kinase 10
4296	MAP3K11	mitogen-activated protein kinase kinase kinase 11
4297	MLL	myeloid/lymphoid or mixed-lineage leukemia (trithorax homolog, Drosophila)
4298	MLLT1	myeloid/lymphoid or mixed-lineage leukemia (trithorax homolog, Drosophila); translocated to, 1
4299	AFF1	AF4/FMR2 family, member 1
4300	MLLT3	myeloid/lymphoid or mixed-lineage leukemia (trithorax homolog, Drosophila); translocated to, 3
4301	MLLT4	myeloid/lymphoid or mixed-lineage leukemia (trithorax homolog, Drosophila); translocated to, 4
4302	MLLT6	myeloid/lymphoid or mixed-lineage leukemia (trithorax homolog, Drosophila); translocated to, 6
4303	FOXO4	forkhead box O4
4306	NR3C2	nuclear receptor subfamily 3, group C, member 2
4308	TRPM1	transient receptor potential cation channel, subfamily M, member 1
4313	MMP2	matrix metallopeptidase 2 (gelatinase A, 72kDa gelatinase, 72kDa type IV collagenase)
4314	MMP3	matrix metallopeptidase 3 (stromelysin 1, progelatinase)
4317	MMP8	matrix metallopeptidase 8 (neutrophil collagenase)
4318	MMP9	matrix metallopeptidase 9 (gelatinase B, 92kDa gelatinase, 92kDa type IV collagenase)
4320	MMP11	matrix metallopeptidase 11 (stromelysin 3)
4329	ALDH6A1	aldehyde dehydrogenase 6 family, member A1
4330	MN1	meningioma (disrupted in balanced translocation) 1
4331	MNAT1	menage a trois homolog 1, cyclin H assembly factor (Xenopus laevis)
4335	MNT	MAX binding protein
4337	MOCS1	molybdenum cofactor synthesis 1
4338	MOCS2	molybdenum cofactor synthesis 2
4340	MOG	myelin oligodendrocyte glycoprotein
4342	MOS	v-mos Moloney murine sarcoma viral oncogene homolog
4343	MOV10	Mov10, Moloney leukemia virus 10, homolog (mouse)
4350	MPG	N-methylpurine-DNA glycosylase
4353	MPO	myeloperoxidase
4354	MPP1	membrane protein, palmitoylated 1, 55kDa
4355	MPP2	membrane protein, palmitoylated 2 (MAGUK p55 subfamily member 2)
4356	MPP3	membrane protein, palmitoylated 3 (MAGUK p55 subfamily member 3)
4357	MPST	mercaptopyruvate sulfurtransferase
4358	MPV17	MpV17 mitochondrial inner membrane protein
4359	MPZ	myelin protein zero
4360	MRC1	mannose receptor, C type 1
4361	MRE11A	MRE11 meiotic recombination 11 homolog A (S. cerevisiae)
4363	ABCC1	ATP-binding cassette, sub-family C (CFTR/MRP), member 1
4430	MYO1B	myosin IB
4436	MSH2	mutS homolog 2, colon cancer, nonpolyposis type 1 (E. coli)
4437	MSH3	mutS homolog 3 (E. coli)
4438	MSH4	mutS homolog 4 (E. coli)
4440	MSI1	musashi homolog 1 (Drosophila)
4478	MSN	moesin
4481	MSR1	macrophage scavenger receptor 1
4482	MSRA	methionine sulfoxide reductase A
4486	MST1R	macrophage stimulating 1 receptor (c-met-related tyrosine kinase)
4487	MSX1	msh homeobox 1
4493	MT1E	metallothionein 1E
4494	MT1F	metallothionein 1F
4495	MT1G	metallothionein 1G
4499	MT1M	metallothionein 1M
4502	MT2A	metallothionein 2A
4504	MT3	metallothionein 3
4507	MTAP	methylthioadenosine phosphorylase
4513	COX2	cytochrome c oxidase II
4515	MTCP1	mature T-cell proliferation 1
4520	MTF1	metal-regulatory transcription factor 1
4522	MTHFD1	methylenetetrahydrofolate dehydrogenase (NADP+ dependent) 1, methenyltetrahydrofolate cyclohydrolase, formyltetrahydrofolate synthetase
4524	MTHFR	5,10-methylenetetrahydrofolate reductase (NADPH)
4534	MTM1	myotubularin 1
4540	ND5	NADH dehydrogenase, subunit 5 (complex I)
4542	MYO1F	myosin IF
4547	MTTP	microsomal triglyceride transfer protein
4548	MTR	5-methyltetrahydrofolate-homocysteine methyltransferase
4552	MTRR	5-methyltetrahydrofolate-homocysteine methyltransferase reductase
4580	MTX1	metaxin 1
4583	MUC2	mucin 2, oligomeric mucus/gel-forming
4584	MUC3A	mucin 3A, cell surface associated
4585	MUC4	mucin 4, cell surface associated
4586	MUC5AC	mucin 5AC, oligomeric mucus/gel-forming
4588	MUC6	mucin 6, oligomeric mucus/gel-forming
4589	MUC7	mucin 7, secreted
4591	TRIM37	tripartite motif-containing 37
4593	MUSK	muscle, skeletal, receptor tyrosine kinase
4594	MUT	methylmalonyl Coenzyme A mutase
4595	MUTYH	mutY homolog (E. coli)
4597	MVD	mevalonate (diphospho) decarboxylase
4599	MX1	myxovirus (influenza virus) resistance 1, interferon-inducible protein p78 (mouse)
4600	MX2	myxovirus (influenza virus) resistance 2 (mouse)
4601	MXI1	MAX interactor 1
4602	MYB	v-myb myeloblastosis viral oncogene homolog (avian)
4603	MYBL1	v-myb myeloblastosis viral oncogene homolog (avian)-like 1
4605	MYBL2	v-myb myeloblastosis viral oncogene homolog (avian)-like 2
4606	MYBPC2	myosin binding protein C, fast type
4607	MYBPC3	myosin binding protein C, cardiac
4610	MYCL1	v-myc myelocytomatosis viral oncogene homolog 1, lung carcinoma derived (avian)
4615	MYD88	myeloid differentiation primary response gene (88)
4619	MYH1	myosin, heavy chain 1, skeletal muscle, adult
4620	MYH2	myosin, heavy chain 2, skeletal muscle, adult
4621	MYH3	myosin, heavy chain 3, skeletal muscle, embryonic
4622	MYH4	myosin, heavy chain 4, skeletal muscle
4624	MYH6	myosin, heavy chain 6, cardiac muscle, alpha
4625	MYH7	myosin, heavy chain 7, cardiac muscle, beta
4626	MYH8	myosin, heavy chain 8, skeletal muscle, perinatal
4627	MYH9	myosin, heavy chain 9, non-muscle
4628	MYH10	myosin, heavy chain 10, non-muscle
4629	MYH11	myosin, heavy chain 11, smooth muscle
4632	MYL1	myosin, light chain 1, alkali; skeletal, fast
4634	MYL3	myosin, light chain 3, alkali; ventricular, skeletal, slow
4635	MYL4	myosin, light chain 4, alkali; atrial, embryonic
4637	MYL6	myosin, light chain 6, alkali, smooth muscle and non-muscle
4638	MYLK	myosin light chain kinase
4640	MYO1A	myosin IA
4641	MYO1C	myosin IC
4642	MYO1D	myosin ID
4643	MYO1E	myosin IE
4644	MYO5A	myosin VA (heavy chain 12, myoxin)
4645	MYO5B	myosin VB
4646	MYO6	myosin VI
4647	MYO7A	myosin VIIA
4648	MYO7B	myosin VIIB
4649	MYO9A	myosin IXA
4650	MYO9B	myosin IXB
4651	MYO10	myosin X
4653	MYOC	myocilin, trabecular meshwork inducible glucocorticoid response
4659	PPP1R12A	protein phosphatase 1, regulatory (inhibitor) subunit 12A
4660	PPP1R12B	protein phosphatase 1, regulatory (inhibitor) subunit 12B
4661	MYT1	myelin transcription factor 1
4664	NAB1	NGFI-A binding protein 1 (EGR1 binding protein 1)
4665	NAB2	NGFI-A binding protein 2 (EGR1 binding protein 2)
4666	NACA	nascent polypeptide-associated complex alpha subunit
4668	NAGA	N-acetylgalactosaminidase, alpha-
4669	NAGLU	N-acetylglucosaminidase, alpha-
4670	HNRNPM	heterogeneous nuclear ribonucleoprotein M
4671	NAIP	NLR family, apoptosis inhibitory protein
4673	NAP1L1	nucleosome assembly protein 1-like 1
4674	NAP1L2	nucleosome assembly protein 1-like 2
4676	NAP1L4	nucleosome assembly protein 1-like 4
4677	NARS	asparaginyl-tRNA synthetase
4678	NASP	nuclear autoantigenic sperm protein (histone-binding)
4682	NUBP1	nucleotide binding protein 1 (MinD homolog, E. coli)
4683	NBN	nibrin
4686	NCBP1	nuclear cap binding protein subunit 1, 80kDa
4688	NCF2	neutrophil cytosolic factor 2
4690	NCK1	NCK adaptor protein 1
4691	NCL	nucleolin
4700	NDUFA6	NADH dehydrogenase (ubiquinone) 1 alpha subcomplex, 6, 14kDa
4703	NEB	nebulin
4704	NDUFA9	NADH dehydrogenase (ubiquinone) 1 alpha subcomplex, 9, 39kDa
4705	NDUFA10	NADH dehydrogenase (ubiquinone) 1 alpha subcomplex, 10, 42kDa
4706	NDUFAB1	NADH dehydrogenase (ubiquinone) 1, alpha/beta subcomplex, 1, 8kDa
4716	NDUFB10	NADH dehydrogenase (ubiquinone) 1 beta subcomplex, 10, 22kDa
4717	NDUFC1	NADH dehydrogenase (ubiquinone) 1, subcomplex unknown, 1, 6kDa
4718	NDUFC2	NADH dehydrogenase (ubiquinone) 1, subcomplex unknown, 2, 14.5kDa
4719	NDUFS1	NADH dehydrogenase (ubiquinone) Fe-S protein 1, 75kDa (NADH-coenzyme Q reductase)
4720	NDUFS2	NADH dehydrogenase (ubiquinone) Fe-S protein 2, 49kDa (NADH-coenzyme Q reductase)
4722	NDUFS3	NADH dehydrogenase (ubiquinone) Fe-S protein 3, 30kDa (NADH-coenzyme Q reductase)
4723	NDUFV1	NADH dehydrogenase (ubiquinone) flavoprotein 1, 51kDa
4725	NDUFS5	NADH dehydrogenase (ubiquinone) Fe-S protein 5, 15kDa (NADH-coenzyme Q reductase)
4728	NDUFS8	NADH dehydrogenase (ubiquinone) Fe-S protein 8, 23kDa (NADH-coenzyme Q reductase)
4729	NDUFV2	NADH dehydrogenase (ubiquinone) flavoprotein 2, 24kDa
4733	DRG1	developmentally regulated GTP binding protein 1
4734	NEDD4	neural precursor cell expressed, developmentally down-regulated 4
4735	SEPT2	septin 2
4736	RPL10A	ribosomal protein L10a
4738	NEDD8	neural precursor cell expressed, developmentally down-regulated 8
4741	NEFM	neurofilament, medium polypeptide
4744	NEFH	neurofilament, heavy polypeptide
4745	NELL1	NEL-like 1 (chicken)
4747	NEFL	neurofilament, light polypeptide
4750	NEK1	NIMA (never in mitosis gene a)-related kinase 1
4751	NEK2	NIMA (never in mitosis gene a)-related kinase 2
4756	NEO1	neogenin homolog 1 (chicken)
4758	NEU1	sialidase 1 (lysosomal sialidase)
4763	NF1	neurofibromin 1
4771	NF2	neurofibromin 2 (merlin)
4772	NFATC1	nuclear factor of activated T-cells, cytoplasmic, calcineurin-dependent 1
4773	NFATC2	nuclear factor of activated T-cells, cytoplasmic, calcineurin-dependent 2
4774	NFIA	nuclear factor I/A
4775	NFATC3	nuclear factor of activated T-cells, cytoplasmic, calcineurin-dependent 3
4776	NFATC4	nuclear factor of activated T-cells, cytoplasmic, calcineurin-dependent 4
4779	NFE2L1	nuclear factor (erythroid-derived 2)-like 1
4781	NFIB	nuclear factor I/B
4782	NFIC	nuclear factor I/C (CCAAT-binding transcription factor)
4783	NFIL3	nuclear factor, interleukin 3 regulated
4784	NFIX	nuclear factor I/X (CCAAT-binding transcription factor)
4790	NFKB1	nuclear factor of kappa light polypeptide gene enhancer in B-cells 1
4791	NFKB2	nuclear factor of kappa light polypeptide gene enhancer in B-cells 2 (p49/p100)
4792	NFKBIA	nuclear factor of kappa light polypeptide gene enhancer in B-cells inhibitor, alpha
4793	NFKBIB	nuclear factor of kappa light polypeptide gene enhancer in B-cells inhibitor, beta
4794	NFKBIE	nuclear factor of kappa light polypeptide gene enhancer in B-cells inhibitor, epsilon
4795	NFKBIL1	nuclear factor of kappa light polypeptide gene enhancer in B-cells inhibitor-like 1
4796	NFKBIL2	nuclear factor of kappa light polypeptide gene enhancer in B-cells inhibitor-like 2
4798	NFRKB	nuclear factor related to kappaB binding protein
4799	NFX1	nuclear transcription factor, X-box binding 1
4800	NFYA	nuclear transcription factor Y, alpha
4801	NFYB	nuclear transcription factor Y, beta
4802	NFYC	nuclear transcription factor Y, gamma
4809	NHP2L1	NHP2 non-histone chromosome protein 2-like 1 (S. cerevisiae)
4810	NHS	Nance-Horan syndrome (congenital cataracts and dental anomalies)
4811	NID1	nidogen 1
4820	NKTR	natural killer-tumor recognition sequence
4828	NMB	neuromedin B
4830	NME1	non-metastatic cells 1, protein (NM23A) expressed in
4831	NME2	non-metastatic cells 2, protein (NM23B) expressed in
4833	NME4	non-metastatic cells 4, protein expressed in
4835	NQO2	NAD(P)H dehydrogenase, quinone 2
4836	NMT1	N-myristoyltransferase 1
4837	NNMT	nicotinamide N-methyltransferase
4839	NOP2	NOP2 nucleolar protein homolog (yeast)
4841	NONO	non-POU domain containing, octamer-binding
4843	NOS2	nitric oxide synthase 2, inducible
4848	CNOT2	CCR4-NOT transcription complex, subunit 2
4849	CNOT3	CCR4-NOT transcription complex, subunit 3
4850	CNOT4	CCR4-NOT transcription complex, subunit 4
4851	NOTCH1	Notch homolog 1, translocation-associated (Drosophila)
4853	NOTCH2	Notch homolog 2 (Drosophila)
4854	NOTCH3	Notch homolog 3 (Drosophila)
4855	NOTCH4	Notch homolog 4 (Drosophila)
4857	NOVA1	neuro-oncological ventral antigen 1
4858	NOVA2	neuro-oncological ventral antigen 2
4860	NP	nucleoside phosphorylase
4862	NPAS2	neuronal PAS domain protein 2
4863	NPAT	nuclear protein, ataxia-telangiectasia locus
4867	NPHP1	nephronophthisis 1 (juvenile)
4869	NPM1	nucleophosmin (nucleolar phosphoprotein B23, numatrin)
4879	NPPB	natriuretic peptide precursor B
4880	NPPC	natriuretic peptide precursor C
4882	NPR2	natriuretic peptide receptor B/guanylate cyclase B (atrionatriuretic peptide receptor B)
4884	NPTX1	neuronal pentraxin I
4887	NPY2R	neuropeptide Y receptor Y2
4889	NPY5R	neuropeptide Y receptor Y5
4892	NRAP	nebulin-related anchoring protein
4893	NRAS	neuroblastoma RAS viral (v-ras) oncogene homolog
4897	NRCAM	neuronal cell adhesion molecule
4898	NRD1	nardilysin (N-arginine dibasic convertase)
4899	NRF1	nuclear respiratory factor 1
4904	YBX1	Y box binding protein 1
4905	NSF	N-ethylmaleimide-sensitive factor
4907	NT5E	5'-nucleotidase, ecto (CD73)
4913	NTHL1	nth endonuclease III-like 1 (E. coli)
4914	NTRK1	neurotrophic tyrosine kinase, receptor, type 1
4916	NTRK3	neurotrophic tyrosine kinase, receptor, type 3
4921	DDR2	discoidin domain receptor tyrosine kinase 2
4923	NTSR1	neurotensin receptor 1 (high affinity)
4924	NUCB1	nucleobindin 1
4926	NUMA1	nuclear mitotic apparatus protein 1
4927	NUP88	nucleoporin 88kDa
4928	NUP98	nucleoporin 98kDa
4931	NVL	nuclear VCP-like
4938	OAS1	2',5'-oligoadenylate synthetase 1, 40/46kDa
4939	OAS2	2'-5'-oligoadenylate synthetase 2, 69/71kDa
4940	OAS3	2'-5'-oligoadenylate synthetase 3, 100kDa
4948	OCA2	oculocutaneous albinism II
4952	OCRL	oculocerebrorenal syndrome of Lowe
4957	ODF2	outer dense fiber of sperm tails 2
4967	OGDH	oxoglutarate (alpha-ketoglutarate) dehydrogenase (lipoamide)
4968	OGG1	8-oxoguanine DNA glycosylase
4973	OLR1	oxidized low density lipoprotein (lectin-like) receptor 1
4974	OMG	oligodendrocyte myelin glycoprotein
4976	OPA1	optic atrophy 1 (autosomal dominant)
4982	TNFRSF11B	tumor necrosis factor receptor superfamily, member 11b
4983	OPHN1	oligophrenin 1
4987	OPRL1	opiate receptor-like 1
4988	OPRM1	opioid receptor, mu 1
4998	ORC1L	origin recognition complex, subunit 1-like (yeast)
4999	ORC2L	origin recognition complex, subunit 2-like (yeast)
5000	ORC4L	origin recognition complex, subunit 4-like (yeast)
5001	ORC5L	origin recognition complex, subunit 5-like (yeast)
5007	OSBP	oxysterol binding protein
5009	OTC	ornithine carbamoyltransferase
5013	OTX1	orthodenticle homeobox 1
5016	OVGP1	oviductal glycoprotein 1, 120kDa
5017	OVOL1	ovo-like 1(Drosophila)
5018	OXA1L	oxidase (cytochrome c) assembly 1-like
5019	OXCT1	3-oxoacid CoA transferase 1
5023	P2RX1	purinergic receptor P2X, ligand-gated ion channel, 1
5024	P2RX3	purinergic receptor P2X, ligand-gated ion channel, 3
5026	P2RX5	purinergic receptor P2X, ligand-gated ion channel, 5
5029	P2RY2	purinergic receptor P2Y, G-protein coupled, 2
5033	P4HA1	prolyl 4-hydroxylase, alpha polypeptide I
5034	P4HB	prolyl 4-hydroxylase, beta polypeptide
5036	PA2G4	proliferation-associated 2G4, 38kDa
5037	PEBP1	phosphatidylethanolamine binding protein 1
5042	PABPC3	poly(A) binding protein, cytoplasmic 3
5046	PCSK6	proprotein convertase subtilisin/kexin type 6
5048	PAFAH1B1	platelet-activating factor acetylhydrolase, isoform Ib, subunit 1 (45kDa)
5049	PAFAH1B2	platelet-activating factor acetylhydrolase, isoform Ib, subunit 2 (30kDa)
5050	PAFAH1B3	platelet-activating factor acetylhydrolase, isoform Ib, subunit 3 (29kDa)
5051	PAFAH2	platelet-activating factor acetylhydrolase 2, 40kDa
5052	PRDX1	peroxiredoxin 1
5053	PAH	phenylalanine hydroxylase
5054	SERPINE1	serpin peptidase inhibitor, clade E (nexin, plasminogen activator inhibitor type 1), member 1
5055	SERPINB2	serpin peptidase inhibitor, clade B (ovalbumin), member 2
5058	PAK1	p21 protein (Cdc42/Rac)-activated kinase 1
5062	PAK2	p21 protein (Cdc42/Rac)-activated kinase 2
5063	PAK3	p21 protein (Cdc42/Rac)-activated kinase 3
5066	PAM	peptidylglycine alpha-amidating monooxygenase
5073	PARN	poly(A)-specific ribonuclease (deadenylation nuclease)
5074	PAWR	PRKC, apoptosis, WT1, regulator
5076	PAX2	paired box 2
5077	PAX3	paired box 3
5081	PAX7	paired box 7
5082	PDCL	phosducin-like
5083	PAX9	paired box 9
5087	PBX1	pre-B-cell leukemia homeobox 1
5089	PBX2	pre-B-cell leukemia homeobox 2
5091	PC	pyruvate carboxylase
5092	PCBD1	pterin-4 alpha-carbinolamine dehydratase/dimerization cofactor of hepatocyte nuclear factor 1 alpha
5093	PCBP1	poly(rC) binding protein 1
5094	PCBP2	poly(rC) binding protein 2
5095	PCCA	propionyl Coenzyme A carboxylase, alpha polypeptide
5096	PCCB	propionyl Coenzyme A carboxylase, beta polypeptide
5097	PCDH1	protocadherin 1
5098	PCDHGC3	protocadherin gamma subfamily C, 3
5100	PCDH8	protocadherin 8
5101	PCDH9	protocadherin 9
5105	PCK1	phosphoenolpyruvate carboxykinase 1 (soluble)
5106	PCK2	phosphoenolpyruvate carboxykinase 2 (mitochondrial)
5108	PCM1	pericentriolar material 1
5110	PCMT1	protein-L-isoaspartate (D-aspartate) O-methyltransferase
5111	PCNA	proliferating cell nuclear antigen
5116	PCNT	pericentrin
5119	CHMP1A	chromatin modifying protein 1A
[truncated: 9,486 more rows]

## Sheet: Non specific proteins
GeneID	GENE Symbol	Description
16	AARS	alanyl-tRNA synthetase
59	ACTA2	actin, alpha 2, smooth muscle, aorta
60	ACTB	actin, beta
70	ACTC1	actin, alpha, cardiac muscle 1
71	ACTG1	actin, gamma 1
86	ACTL6A	actin-like 6A
81569	ACTL8	actin-like 8
87	ACTN1	actinin, alpha 1
89	ACTN3	actinin, alpha 3
81	ACTN4	actinin, alpha 4
60312	AFAP1	actin filament associated protein 1
79026	AHNAK	AHNAK nucleoprotein
113146	AHNAK2	AHNAK nucleoprotein 2
54443	ANLN	anillin, actin binding protein
301	ANXA1	annexin A1
302	ANXA2	annexin A2
306	ANXA3	annexin A3
307	ANXA4	annexin A4
308	ANXA5	annexin A5
309	ANXA6	annexin A6
8416	ANXA9	annexin A9
479	ATP12A	ATPase, H+/K+ transporting, nongastric, alpha polypeptide
476	ATP1A1	ATPase, Na+/K+ transporting, alpha 1 polypeptide
477	ATP1A2	ATPase, Na+/K+ transporting, alpha 2 (+) polypeptide
478	ATP1A3	ATPase, Na+/K+ transporting, alpha 3 polypeptide
488	ATP2A2	ATPase, Ca++ transporting, cardiac muscle, slow twitch 2
498	ATP5A1	ATP synthase, H+ transporting, mitochondrial F1 complex, alpha subunit 1, cardiac muscle
506	ATP5B	ATP synthase, H+ transporting, mitochondrial F1 complex, beta polypeptide
509	ATP5C1	ATP synthase, H+ transporting, mitochondrial F1 complex, gamma polypeptide 1
515	ATP5F1	ATP synthase, H+ transporting, mitochondrial F0 complex, subunit B1
10476	ATP5H	ATP synthase, H+ transporting, mitochondrial F0 complex, subunit d
539	ATP5O	ATP synthase, H+ transporting, mitochondrial F1 complex, O subunit
523	ATP6V1A	ATPase, H+ transporting, lysosomal 70kDa, V1 subunit A
526	ATP6V1B2	ATPase, H+ transporting, lysosomal 56/58kDa, V1 subunit B2
529	ATP6V1E1	ATPase, H+ transporting, lysosomal 31kDa, V1 subunit E1
145173	B3GALTL	beta 1,3-galactosyltransferase-like
822	CAPG	capping protein (actin filament), gelsolin-like
829	CAPZA1	capping protein (actin filament) muscle Z-line, alpha 1
830	CAPZA2	capping protein (actin filament) muscle Z-line, alpha 2
832	CAPZB	capping protein (actin filament) muscle Z-line, beta
10576	CCT2	chaperonin containing TCP1, subunit 2 (beta)
7203	CCT3	chaperonin containing TCP1, subunit 3 (gamma)
10575	CCT4	chaperonin containing TCP1, subunit 4 (delta)
22948	CCT5	chaperonin containing TCP1, subunit 5 (epsilon)
908	CCT6A	chaperonin containing TCP1, subunit 6A (zeta 1)
10693	CCT6B	chaperonin containing TCP1, subunit 6B (zeta 2)
10574	CCT7	chaperonin containing TCP1, subunit 7 (eta)
10694	CCT8	chaperonin containing TCP1, subunit 8 (theta)
1041	CDSN	corneodesmosin
9793	CKAP5	cytoskeleton associated protein 5
1211	CLTA	clathrin, light chain (Lca)
1213	CLTC	clathrin, heavy chain (Hc)
8218	CLTCL1	clathrin, heavy chain-like 1
22818	COPZ1	coatomer protein complex, subunit zeta 1
23603	CORO1C	coronin, actin binding protein, 1C
1475	CSTA	cystatin A (stefin A)
2017	CTTN	cortactin
117159	DCD	dermcidin
1639	DCTN1	dynactin 1 (p150, glued homolog, Drosophila)
10540	DCTN2	dynactin 2 (p50)
11258	DCTN3	dynactin 3 (p22)
1736	DKC1	dyskeratosis congenita 1, dyskerin
196385	DNAH10	dynein, axonemal, heavy chain 10
8632	DNAH17	dynein, axonemal, heavy chain 17
1767	DNAH5	dynein, axonemal, heavy chain 5
1769	DNAH8	dynein, axonemal, heavy chain 8
3301	DNAJA1	DnaJ (Hsp40) homolog, subfamily A, member 1
10294	DNAJA2	DnaJ (Hsp40) homolog, subfamily A, member 2
9093	DNAJA3	DnaJ (Hsp40) homolog, subfamily A, member 3
51726	DNAJB11	DnaJ (Hsp40) homolog, subfamily B, member 11
11080	DNAJB4	DnaJ (Hsp40) homolog, subfamily B, member 4
25822	DNAJB5	DnaJ (Hsp40) homolog, subfamily B, member 5
10049	DNAJB6	DnaJ (Hsp40) homolog, subfamily B, member 6
54431	DNAJC10	DnaJ (Hsp40) homolog, subfamily C, member 10
55192	DNAJC17	DnaJ (Hsp40) homolog, subfamily C, member 17
7266	DNAJC7	DnaJ (Hsp40) homolog, subfamily C, member 7
23234	DNAJC9	DnaJ (Hsp40) homolog, subfamily C, member 9
10059	DNM1L	dynamin 1-like
1785	DNM2	dynamin 2
26052	DNM3	dynamin 3
1828	DSG1	desmoglein 1
1829	DSG2	desmoglein 2
1832	DSP	desmoplakin
1778	DYNC1H1	dynein, cytoplasmic 1, heavy chain 1
1780	DYNC1I1	dynein, cytoplasmic 1, intermediate chain 1
1781	DYNC1I2	dynein, cytoplasmic 1, intermediate chain 2
51143	DYNC1LI1	dynein, cytoplasmic 1, light intermediate chain 1
1783	DYNC1LI2	dynein, cytoplasmic 1, light intermediate chain 2
79659	DYNC2H1	dynein, cytoplasmic 2, heavy chain 1
8655	DYNLL1	dynein, light chain, LC8-type 1
140735	DYNLL2	dynein, light chain, LC8-type 2
1915	EEF1A1	eukaryotic translation elongation factor 1 alpha 1
1917	EEF1A2	eukaryotic translation elongation factor 1 alpha 2
1936	EEF1D	eukaryotic translation elongation factor 1 delta (guanine nucleotide exchange protein)
9521	EEF1E1	eukaryotic translation elongation factor 1 epsilon 1
1937	EEF1G	eukaryotic translation elongation factor 1 gamma
1938	EEF2	eukaryotic translation elongation factor 2
2023	ENO1	enolase 1, (alpha)
2058	EPRS	glutamyl-prolyl-tRNA synthetase
2243	FGA	fibrinogen alpha chain
2312	FLG	filaggrin
388698	FLG2	filaggrin family member 2
2316	FLNA	filamin A, alpha (actin binding protein 280)
2317	FLNB	filamin B, beta (actin binding protein 278)
2318	FLNC	filamin C, gamma (actin binding protein 280)
2335	FN1	fibronectin 1
2597	GAPDH	glyceraldehyde-3-phosphate dehydrogenase
2670	GFAP	glial fibrillary acidic protein
2934	GSN	gelsolin (amyloidosis, Finnish type)
3054	HCFC1	host cell factor C1 (VP16-accessory protein)
10949	HNRNPA0	heterogeneous nuclear ribonucleoprotein A0
3178	HNRNPA1	heterogeneous nuclear ribonucleoprotein A1
3181	HNRNPA2B1	heterogeneous nuclear ribonucleoprotein A2/B1
3183	HNRNPC	heterogeneous nuclear ribonucleoprotein C (C1/C2)
3191	HNRNPL	heterogeneous nuclear ribonucleoprotein L
10236	HNRNPR	heterogeneous nuclear ribonucleoprotein R
3192	HNRNPU	heterogeneous nuclear ribonucleoprotein U (scaffold attachment factor A)
9987	HNRPDL	heterogeneous nuclear ribonucleoprotein D-like
388697	HRNR	hornerin
3320	HSP90AA1	heat shock protein 90kDa alpha (cytosolic), class A member 1
3326	HSP90AB1	heat shock protein 90kDa alpha (cytosolic), class B member 1
7184	HSP90B1	heat shock protein 90kDa beta (Grp94), member 1
3303	HSPA1A	heat shock 70kDa protein 1A
3304	HSPA1B	heat shock 70kDa protein 1B
3305	HSPA1L	heat shock 70kDa protein 1-like
3306	HSPA2	heat shock 70kDa protein 2
3308	HSPA4	heat shock 70kDa protein 4
22824	HSPA4L	heat shock 70kDa protein 4-like
3309	HSPA5	heat shock 70kDa protein 5 (glucose-regulated protein, 78kDa)
3310	HSPA6	heat shock 70kDa protein 6 (HSP70B')
3312	HSPA8	heat shock 70kDa protein 8
3313	HSPA9	heat shock 70kDa protein 9 (mortalin)
3315	HSPB1	heat shock 27kDa protein 1
3329	HSPD1	heat shock 60kDa protein 1 (chaperonin)
3336	HSPE1	heat shock 10kDa protein 1 (chaperonin 10)
10808	HSPH1	heat shock 105kDa/110kDa protein 1
3376	IARS	isoleucyl-tRNA synthetase
3321	IGSF3	immunoglobulin superfamily, member 3
3728	JUP	junction plakoglobin
3735	KARS	lysyl-tRNA synthetase
11004	KIF2C	kinesin family member 2C
3836	KPNA1	karyopherin alpha 1 (importin alpha 5)
3838	KPNA2	karyopherin alpha 2 (RAG cohort 1, importin alpha 1)
3840	KPNA4	karyopherin alpha 4 (importin alpha 3)
3841	KPNA5	karyopherin alpha 5 (importin alpha 6)
23633	KPNA6	karyopherin alpha 6 (importin alpha 7)
3837	KPNB1	karyopherin (importin) beta 1
3914	LAMB3	laminin, beta 3
51520	LARS	leucyl-tRNA synthetase
4000	LMNA	lamin A/C
4001	LMNB1	lamin B1
84823	LMNB2	lamin B2
646821	LOC646821	similar to beta-actin
4069	LYZ	lysozyme (renal amyloidosis)
4141	MARS	methionyl-tRNA synthetase
9782	MATR3	matrin 3
4288	MKI67	antigen identified by monoclonal antibody Ki-67
124995	MRPL10	mitochondrial ribosomal protein L10
65003	MRPL11	mitochondrial ribosomal protein L11
6182	MRPL12	mitochondrial ribosomal protein L12
51253	MRPL37	mitochondrial ribosomal protein L37
54148	MRPL39	mitochondrial ribosomal protein L39
63931	MRPS14	mitochondrial ribosomal protein S14
23107	MRPS27	mitochondrial ribosomal protein S27
10240	MRPS31	mitochondrial ribosomal protein S31
92259	MRPS36	mitochondrial ribosomal protein S36
64965	MRPS9	mitochondrial ribosomal protein S9
4619	MYH1	myosin, heavy chain 1, skeletal muscle, adult
4628	MYH10	myosin, heavy chain 10, non-muscle
4629	MYH11	myosin, heavy chain 11, smooth muscle
79784	MYH14	myosin, heavy chain 14
4620	MYH2	myosin, heavy chain 2, skeletal muscle, adult
4621	MYH3	myosin, heavy chain 3, skeletal muscle, embryonic
4622	MYH4	myosin, heavy chain 4, skeletal muscle
4624	MYH6	myosin, heavy chain 6, cardiac muscle, alpha
4625	MYH7	myosin, heavy chain 7, cardiac muscle, beta
4627	MYH9	myosin, heavy chain 9, non-muscle
4634	MYL3	myosin, light chain 3, alkali; ventricular, skeletal, slow
4635	MYL4	myosin, light chain 4, alkali; atrial, embryonic
4637	MYL6	myosin, light chain 6, alkali, smooth muscle and non-muscle
140465	MYL6B	myosin, light chain 6B, alkali, smooth muscle and non-muscle
10398	MYL9	myosin, light chain 9, regulatory
4651	MYO10	myosin X
399687	MYO18A	myosin XVIIIA
84700	MYO18B	myosin XVIIIB
4640	MYO1A	myosin IA
4430	MYO1B	myosin IB
4641	MYO1C	myosin IC
4642	MYO1D	myosin ID
4643	MYO1E	myosin IE
4542	MYO1F	myosin IF
4644	MYO5A	myosin VA (heavy chain 12, myoxin)
4646	MYO6	myosin VI
4647	MYO7A	myosin VIIA
4649	MYO9A	myosin IXA
4650	MYO9B	myosin IXB
9221	NOLC1	nucleolar and coiled-body phosphoprotein 1
4841	NONO	non-POU domain containing, octamer-binding
4926	NUMA1	nuclear mitotic apparatus protein 1
5093	PCBP1	poly(rC) binding protein 1
5094	PCBP2	poly(rC) binding protein 2
5339	PLEC1	plectin 1, intermediate filament binding protein 500kDa
5630	PRPH	peripherin
5859	QARS	glutaminyl-tRNA synthetase
5917	RARS	arginyl-tRNA synthetase
6134	RPL10	ribosomal protein L10
4736	RPL10A	ribosomal protein L10a
6135	RPL11	ribosomal protein L11
6136	RPL12	ribosomal protein L12
6137	RPL13	ribosomal protein L13
9045	RPL14	ribosomal protein L14
6139	RPL17	ribosomal protein L17
6141	RPL18	ribosomal protein L18
6143	RPL19	ribosomal protein L19
6146	RPL22	ribosomal protein L22
9349	RPL23	ribosomal protein L23
729480	RPL23AP5	ribosomal protein L23a pseudogene 5
6152	RPL24	ribosomal protein L24
6154	RPL26	ribosomal protein L26
6155	RPL27	ribosomal protein L27
6158	RPL28	ribosomal protein L28
6159	RPL29	ribosomal protein L29
6122	RPL3	ribosomal protein L3
6156	RPL30	ribosomal protein L30
6160	RPL31	ribosomal protein L31
11224	RPL35	ribosomal protein L35
6124	RPL4	ribosomal protein L4
6125	RPL5	ribosomal protein L5
6128	RPL6	ribosomal protein L6
6129	RPL7	ribosomal protein L7
6132	RPL8	ribosomal protein L8
6133	RPL9	ribosomal protein L9
6175	RPLP0	ribosomal protein, large, P0
6176	RPLP1	ribosomal protein, large, P1
6181	RPLP2	ribosomal protein, large, P2
6205	RPS11	ribosomal protein S11
6207	RPS13	ribosomal protein S13
6208	RPS14	ribosomal protein S14
6209	RPS15	ribosomal protein S15
6217	RPS16	ribosomal protein S16
6218	RPS17	ribosomal protein S17
6222	RPS18	ribosomal protein S18
6223	RPS19	ribosomal protein S19
6187	RPS2	ribosomal protein S2
6224	RPS20	ribosomal protein S20
6228	RPS23	ribosomal protein S23
6229	RPS24	ribosomal protein S24
6231	RPS26	ribosomal protein S26
6188	RPS3	ribosomal protein S3
6189	RPS3A	ribosomal protein S3A
6191	RPS4X	ribosomal protein S4, X-linked
6192	RPS4Y1	ribosomal protein S4, Y-linked 1
6193	RPS5	ribosomal protein S5
6194	RPS6	ribosomal protein S6
6201	RPS7	ribosomal protein S7
6202	RPS8	ribosomal protein S8
6203	RPS9	ribosomal protein S9
6280	S100A9	S100 calcium binding protein A9
10291	SF3A1	splicing factor 3a, subunit 1, 120kDa
23451	SF3B1	splicing factor 3b, subunit 1, 155kDa
10992	SF3B2	splicing factor 3b, subunit 2, 145kDa
23450	SF3B3	splicing factor 3b, subunit 3, 130kDa
6421	SFPQ	splicing factor proline/glutamine-rich (polypyrimidine tract binding protein associated)
6637	SNRPG	small nuclear ribonucleoprotein polypeptide G
6709	SPTAN1	spectrin, alpha, non-erythrocytic 1 (alpha-fodrin)
6711	SPTBN1	spectrin, beta, non-erythrocytic 1
57731	SPTBN4	spectrin, beta, non-erythrocytic 4
8189	SYMPK	symplekin
6949	TCOF1	Treacher Collins-Franceschetti syndrome 1
7112	TMPO	thymopoietin
7170	TPM3	tropomyosin 3
7171	TPM4	tropomyosin 4
7846	TUBA1A	tubulin, alpha 1a
10376	TUBA1B	tubulin, alpha 1b
84790	TUBA1C	tubulin, alpha 1c
7278	TUBA3C	tubulin, alpha 3c
112714	TUBA3E	tubulin, alpha 3e
7277	TUBA4A	tubulin, alpha 4a
79861	TUBAL3	tubulin, alpha-like 3
203068	TUBB	tubulin, beta
81027	TUBB1	tubulin, beta 1
7280	TUBB2A	tubulin, beta 2A
347733	TUBB2B	tubulin, beta 2B
10383	TUBB2C	tubulin, beta 2C
10381	TUBB3	tubulin, beta 3
10382	TUBB4	tubulin, beta 4
84617	TUBB6	tubulin, beta 6
7407	VARS	valyl-tRNA synthetase
7431	VIM	vimentin
7453	WARS	tryptophanyl-tRNA synthetase
