# Supplementary material for: Recovering Protein-Protein and Domain-Domain Interactions from Aggregation of IP-MS Proteomics of Coregulator Complexes
Source: PLoS Comput Biol. 2011 Dec 29;7(12):e1002319. doi: 10.1371/journal.pcbi.1002319 (PMC3248428; doi:10.1371/journal.pcbi.1002319)
Supplement: Dataset S3 — Scores for top 1% predicted DDIs by each method. (XLSX) [file pcbi.1002319.s003.xlsx]

## Sheet: Sheet1
* Sorenen = 1- Sorensen Distance
** We used Sorensen simularity in the sombined methods
Interaction Rank	Domain 1	Domain 2	Frequency	λ	Interaction reported in DOMINE	*Sorensen Distance	E3	AB	Pr	**E3 x Sorensen	**AB x Sorensen	**Pr x Sorensen	**AB x Sorensen
1	RRM_1	RRM_1	148628	4189	1	0.256438	621.27	38.135	1	461.953	28.3558	0.743562	118782
2	WD40	RRM_1	103265	5542	1	0.441935	326.371	20.2969	1	182.136	11.327	0.558065	62774.3
3	WD40	Helicase_C	83635	4034	1	0.424837	354.202	22.3825	1	203.724	12.8736	0.575163	51932
4	Pkinase	Pkinase	5220	743	1	0.25	767.95	91.3411	1	575.963	68.5058	0.75	50899.8
5	Helicase_C	DEAD	92231	2783	1	0.218778	3636.81	21.6188	1	2841.16	16.8891	0.781222	47002.2
6	WD40	DEAD	65335	2937	1	0.424837	354.202	22.3825	1	203.724	12.8736	0.575163	37809.7
7	WD40	Pkinase	16431	1995	1	0.333333	195.961	26.5491	1	130.64	17.6994	0.666667	35310.3
8	Pkinase	RRM_1	51934	4532	1	0.571429	216.794	17.9625	1	92.9116	7.69823	0.428571	34888.4
9	WD40	WD40	17500	1481	1	0.341463	1446.6	35.0021	1	952.636	23.0501	0.658537	34137.2
10	Helicase_C	Helicase_C	97460	1999	1	0.218778	3636.81	21.6188	1	2841.16	16.8891	0.781222	33761.2
11	Pkinase	Helicase_C	46134	3626	1	0.59673	204.731	22.7089	1	82.5616	9.1578	0.40327	33206.2
12	Helicase_C	RRM_1	238519	5661	1	0.234766	1343.85	7.31915	1	1028.36	5.60086	0.765234	31706.5
13	WD40	AAA	32642	1613	1	0.3	710.487	22.6527	1	497.341	15.8569	0.7	25577.2
14	RRM_1	PCI	7643	737	1	0.583893	404.915	75.5924	1	168.488	31.4545	0.416107	23182
15	SAP	RRM_1	31418	997	1	0.391248	531.798	38.135	1	323.733	23.2148	0.608752	23145.1
16	DEAD	RRM_1	186208	4014	1	0.234766	1343.85	7.31915	1	1028.36	5.60086	0.765234	22481.8
17	PHD	Helicase_C	41085	1501	1	0.33744	628.704	18.1883	1	416.554	12.0509	0.66256	18088.3
18	RRM_1	UCH	7964	731	1	0.509091	426.193	47.5748	1	209.222	23.3549	0.490909	17072.4
19	DEAD	DEAD	57814	976	1	0.218778	3636.81	21.6188	1	2841.16	16.8891	0.781222	16483.7
20	RRM_1	Kinesin	36019	1485	0	0.315259	645.488	15.7662	1	441.992	10.7958	0.684741	16031.7
21	WD40	PI3_PI4_kinase	4303	269	1	0.276596	996.305	75.3	1	720.731	54.4723	0.723404	14653.1
22	Helicase_C	SNF2_N	39337	1183	1	0.36518	340.195	18.1883	1	215.962	11.5463	0.63482	13659.3
23	WD40	TPR_1	5729	644	1	0.464286	324.736	35.3725	1	173.966	18.9496	0.535714	12203.5
24	Pkinase	PI3_PI4_kinase	2188	223	1	0.276596	996.305	75.3	1	720.731	54.4723	0.723404	12147.3
25	Helicase_C	Bromodomain	24701	948	1	0.381818	348.108	19.6254	1	215.194	12.1321	0.618182	11501.2
26	Mov34	RRM_1	15208	550	1	0.396752	329.976	33.391	1	199.058	20.1431	0.603248	11078.7
27	Helicase_C	Mov34	12307	395	1	0.3	4032.66	37.7626	1	2822.86	26.4338	0.7	10441.4
28	PHD	RRM_1	48883	2003	1	0.353116	393.438	7.68532	1	254.509	4.97152	0.646884	9957.95
29	Helicase_C	BAH	19064	437	0	0.397739	1499.61	37.4352	1	903.154	22.5458	0.602261	9852.51
30	AAA	Helicase_C	79592	1621	1	0.246663	927.244	8.0552	1	698.527	6.06828	0.753337	9836.68
31	Helicase_C	ELM2	16710	436	0	0.397739	1499.61	37.4352	1	903.154	22.5458	0.602261	9829.96
32	Helicase_C	Myb_DNA-binding	27387	651	1	0.351159	1574.64	22.6545	1	1021.69	14.6992	0.648841	9569.18
33	CH	RRM_1	26501	1582	0	0.361533	446.957	9.37828	1	285.367	5.98772	0.638467	9472.57
34	Helicase_C	GATA	23953	420	0	0.397739	1499.61	37.4352	0.99485	903.154	22.5458	0.599159	9469.23
35	WD40	Myb_DNA-binding	11959	611	1	0.467412	1216.82	28.7807	1	648.066	15.3283	0.532588	9365.58
36	Bromodomain	RRM_1	29841	1261	1	0.391144	292.013	11.1501	1	177.794	6.78878	0.608856	8560.65
37	Bromodomain	DEAD	18910	670	0	0.381818	340.195	19.6254	1	210.302	12.1321	0.618182	8128.49
38	RRM_1	KOW	2195	242	0	0.736264	1053.11	125.151	1	277.744	33.0068	0.263736	7987.64
39	Ank	Pkinase	3088	494	1	0.6	478.937	38.8624	1	191.575	15.545	0.4	7679.22
40	HEAT	WD40	11521	758	1	0.536585	224.108	21.6766	1	103.855	10.0453	0.463415	7614.31
41	AAA	Kinesin	13092	463	0	0.321751	555.452	24.2334	1	376.735	16.4363	0.678249	7610
42	SPRY	RRM_1	17492	995	1	0.566443	317.163	17.4818	1	137.508	7.57935	0.433557	7541.45
43	HEAT	RRM_1	32129	1122	1	0.437393	393.338	11.7886	1	221.295	6.63237	0.562607	7441.52
44	DEAD	Mov34	9483	272	1	0.3	4032.66	37.7626	1	2822.86	26.4338	0.7	7190
45	RRM_1	zf-CCCH	17238	595	1	0.323407	667.971	16.9699	1	451.945	11.4817	0.676593	6831.63
46	KH_1	Kinesin	7230	255	0	0.325328	1080.34	39.6324	1	728.879	26.7389	0.674672	6818.41
47	WD40	PHD	17140	1148	1	0.491824	482.857	11.4302	1	245.376	5.80854	0.508176	6668.2
48	Helicase_C	Metallophos	11107	421	1	0.477387	156.55	30.306	0.998221	81.8151	15.8383	0.521683	6667.93
49	Helicase_C	WW	15895	461	1	0.312375	1942.58	20.671	1	1335.76	14.2139	0.687625	6552.62
50	Helicase_C	GTP_EFTU	11494	364	1	0.302152	1871.84	25.2185	0.999771	1306.26	17.5987	0.697689	6405.92
51	WD40	SNF2_N	18112	1072	1	0.48289	229.986	11.4302	1	118.928	5.91066	0.51711	6336.22
52	AAA	AAA	14776	336	1	0.22919	1776.84	23.5739	1	1369.6	18.171	0.77081	6105.45
53	Actin	Helicase_C	12711	450	0	0.44403	570.992	23.9923	1	317.454	13.339	0.55597	6002.56
54	RRM_1	zf-RanBP	26182	697	1	0.373626	262.788	13.4298	1	164.604	8.41205	0.626374	5863.2
55	Helicase_C	HA2	14304	448	1	0.399411	2119.76	21.6188	1	1273.1	12.984	0.600589	5816.83
56	Helicase_C	DUF1605	14298	446	1	0.399411	2119.76	21.6188	1	1273.1	12.984	0.600589	5790.86
57	Pkinase	DEAD	35164	2634	1	0.609959	204.731	5.56989	1	79.8534	2.17249	0.390041	5722.33
58	Helicase_C	GTP_EFTU_D2	11254	314	0	0.302152	1871.84	25.2185	0.999771	1306.26	17.5987	0.697689	5525.99
59	Pkinase	Kinesin	7470	668	1	0.59408	386.504	20.2198	1	156.89	8.20762	0.40592	5482.69
60	Helicase_C	Chromo	15528	564	1	0.475452	186.232	18.1883	1	97.6878	9.54065	0.524548	5380.93
61	AAA	RRM_1	91503	2270	1	0.268398	636.919	3.22881	1	465.971	2.3622	0.731602	5362.2
62	PDZ	Kinesin	1490	174	0	0.688889	882.39	94.9637	1	274.521	29.5443	0.311111	5140.7
63	Helicase_C	IBN_N	19476	593	0	0.407906	668.024	14.0576	1	395.533	8.32345	0.592094	4935.81
64	ARID	Helicase_C	6800	450	0	0.520179	934.17	22.8399	1	448.234	10.9591	0.479821	4931.58
65	PHD	SNF2_N	10083	447	1	0.395789	186.232	18.1883	1	112.524	10.9896	0.604211	4912.34
66	WW	DEAD	12508	345	1	0.312375	1942.58	20.671	1	1335.76	14.2139	0.687625	4903.8
67	AAA	KH_1	17643	370	0	0.263623	1308.23	17.7985	1	963.352	13.1064	0.736377	4849.37
68	WD40	PCI	2500	328	1	0.540541	115.117	31.5659	1	52.8914	14.5033	0.459459	4757.07
69	DEAD	Metallophos	8638	296	1	0.477387	156.55	30.306	0.999776	81.8151	15.8383	0.522496	4688.14
70	RhoGAP	Kinesin	2730	138	0	0.2	3372.99	42.1516	0.99995	2698.39	33.7213	0.79996	4653.54
71	DEAD	GTP_EFTU	9021	260	0	0.302152	1871.84	25.2185	0.999771	1306.26	17.5987	0.697689	4575.66
72	KH_1	Helicase_C	43718	869	0	0.192845	2499.27	6.40037	1	2017.3	5.16609	0.807155	4489.33
73	PHD	HMG_box	4712	271	1	0.491803	775.966	32.5759	1	394.343	16.555	0.508197	4486.4
74	PHD	Bromodomain	5496	312	1	0.395789	698.506	23.4428	1	422.045	14.1644	0.604211	4419.29
75	Pkinase	AAA	18823	1416	1	0.478261	388.844	5.89035	1	202.875	3.07323	0.521739	4351.69
76	WD40	Bromodomain	10553	721	1	0.48289	482.857	11.5702	1	249.69	5.98309	0.51711	4313.81
77	HMG_box	RRM_1	26321	1127	0	0.452206	211.044	6.96682	1	115.609	3.81638	0.547794	4301.06
78	Helicase_C	HMG_box	21704	800	1	0.459716	550.771	9.87076	1	297.573	5.33302	0.540284	4266.41
79	DEAD	HA2	11190	326	1	0.399411	2119.76	21.6188	0.999763	1273.1	12.984	0.600447	4232.78
80	DEAD	DUF1605	11184	324	0	0.399411	2119.76	21.6188	0.999763	1273.1	12.984	0.600447	4206.81
81	PHD	GATA	5525	188	0	0.405516	1499.61	37.4352	1	891.492	22.2547	0.594484	4183.88
82	PHD	PHD	4183	254	1	0.302326	698.506	23.4428	1	487.33	16.3555	0.697674	4154.29
83	TPR_1	RRM_1	16788	1341	1	0.606178	158.934	7.86549	1	62.5917	3.09761	0.393822	4153.89
84	SNF2_N	RRM_1	51813	1605	1	0.391144	292.013	4.22896	1	177.794	2.57483	0.608856	4132.6
85	WD40	SPRY	5921	519	1	0.266667	120.283	10.6755	0.999887	88.2077	7.82869	0.73325	4063.09
86	PHD	ELM2	3984	179	0	0.405516	1499.61	37.4352	1	891.492	22.2547	0.594484	3983.58
87	WD40	C2	910	191	1	0.6	312.981	51.661	0.999911	125.192	20.6644	0.399964	3946.9
88	DEAD	GTP_EFTU_D2	8827	222	0	0.302152	1871.84	25.2185	0.999771	1306.26	17.5987	0.697689	3906.91
89	PHD	BAH	4298	174	1	0.405516	1499.61	37.4352	1	891.492	22.2547	0.594484	3872.31
90	Pkinase	CH	5341	595	0	0.515152	255.599	13.1827	1	123.927	6.39163	0.484848	3803.02
91	DEAD	Myb_DNA-binding	20796	436	1	0.369983	499.063	13.6964	1	314.418	8.62898	0.630017	3762.23
92	Ank	CH	2004	239	0	0.28	688.54	21.8046	1	495.749	15.6993	0.72	3752.13
93	PHD	Myb_DNA-binding	6078	248	1	0.411236	672.466	25.0637	1	395.924	14.7566	0.588764	3659.63
94	Helicase_C	UCH	6166	565	1	0.397516	197.034	10.4299	1	118.71	6.28386	0.602484	3550.38
95	Ank	KH_1	3645	341	1	0.630631	465.021	27.9573	1	171.765	10.3266	0.369369	3521.37
96	SAP	Helicase_C	24743	678	0	0.421525	357.548	8.83753	1	206.833	5.1123	0.578475	3466.14
97	Helicase_C	SWIRM	15268	233	0	0.351159	1574.64	22.6545	0.997501	1021.69	14.6992	0.64722	3424.91
98	Helicase_C	Kinesin	32440	1124	0	0.307432	1008.25	4.31303	1	698.279	2.98706	0.692568	3357.46
99	HEAT	PI3_PI4_kinase	1446	61	0	0.276596	996.305	75.3	0.997788	720.731	54.4723	0.721804	3322.81
100	DEAD	IBN_N	14742	396	0	0.407906	668.024	14.0576	1	395.533	8.32345	0.592094	3296.09
101	Helicase_C	zf-C2H2	10005	1015	1	0.5	75.702	6.49448	1	37.851	3.24724	0.5	3295.95
102	RRM_1	PWI	14951	420	0	0.332107	382.073	11.6418	1	255.184	7.77551	0.667893	3265.71
103	Ank	BRCT	2197	194	1	0.471264	447.342	31.8345	1	236.526	16.832	0.528736	3265.42
104	RRM_1	SMC_hinge	21181	479	0	0.455727	305.43	12.5092	1	166.237	6.80845	0.544273	3261.25
105	WD40	K_tetra	1125	164	0	0.183099	987.514	24.2016	0.997476	806.701	19.7703	0.81484	3242.33
106	WD40	Mov34	5307	347	1	0.443149	216.041	16.7608	1	120.303	9.33326	0.556851	3238.64
107	Pkinase	PH	3406	439	1	0.515152	495.426	15.0984	1	240.207	7.32042	0.484848	3213.66
108	Helicase_C	IQ	11031	354	0	0.312375	678.489	13.064	1	466.547	8.98315	0.687625	3180.04
109	G-patch	RRM_1	15080	832	1	0.435583	188.412	6.74547	1	106.343	3.80726	0.564417	3167.64
110	SNF2_N	BAH	4635	138	0	0.397739	1499.61	37.4352	0.992215	903.154	22.5458	0.597573	3111.32
111	SNF2_N	Myb_DNA-binding	6541	211	1	0.351159	1574.64	22.6545	0.998624	1021.69	14.6992	0.647949	3101.53
112	Pkinase	TPR_1	3047	438	1	0.5	122.63	14.1525	1	61.3152	7.07623	0.5	3099.39
113	SNF2_N	ELM2	4194	137	0	0.397739	1499.61	37.4352	1	903.154	22.5458	0.602261	3088.77
114	SNF2_N	GATA	6078	136	0	0.397739	1499.61	37.4352	0.948612	903.154	22.5458	0.571312	3066.23
115	AAA	DEAD	61760	1139	1	0.246663	927.244	3.56931	1	698.527	2.68889	0.753337	3062.65
116	Helicase_C	BRCT	27393	568	1	0.256595	1860.39	7.23656	1	1383.02	5.3797	0.743405	3055.67
117	Helicase_C	Hist_deacetyl	14443	250	0	0.349436	882.152	18.6805	1	573.896	12.1528	0.650564	3038.21
118	WW	RRM_1	18836	656	1	0.361533	446.957	7.22674	1	285.367	4.61403	0.638467	3026.8
119	RRM_1	SMC_N	20533	435	1	0.455727	305.43	12.5092	1	166.237	6.80845	0.544273	2961.67
120	AAA	Bromodomain	9482	352	1	0.386364	509.454	13.6685	0.999967	312.619	8.38751	0.613616	2952.4
121	WD40	SAP	10782	660	0	0.557292	192.75	10.0505	1	85.332	4.44942	0.442708	2936.62
122	PH	RRM_1	19419	1714	0	0.449091	372.451	3.10091	1	205.187	1.70832	0.550909	2928.06
123	PI3_PI4_kinase	RRM_1	11955	411	0	0.496821	348.487	14.154	1	175.352	7.12197	0.503179	2927.13
124	RRM_1	HA2	20016	654	0	0.395939	751.544	7.31915	1	453.979	4.42121	0.604061	2891.47
125	RRM_1	DUF1605	20013	653	0	0.395939	751.544	7.31915	1	453.979	4.42121	0.604061	2887.05
126	PDZ	RRM_1	11035	1139	1	0.664975	214.369	7.56412	1	71.8189	2.53417	0.335025	2886.42
127	Helicase_C	HATPase_c	27281	404	1	0.194194	6215.63	8.83931	1	5008.59	7.12277	0.805806	2877.6
128	HEAT	Helicase_C	29694	838	1	0.388585	559.704	5.56989	0.99963	342.212	3.40551	0.611189	2853.82
129	Helicase_C	SPRY	13649	751	1	0.57238	261.267	8.83753	1	111.723	3.7791	0.42762	2838.11
130	C1_1	Kinesin	2193	84	0	0.2	3372.99	42.1516	1	2698.39	33.7213	0.8	2832.59
131	CH	Helicase_C	23037	1176	0	0.312375	678.489	3.48343	1	466.547	2.39529	0.687625	2816.86
132	FHA	Helicase_C	15512	613	1	0.42522	644.732	7.97789	1	370.579	4.58553	0.57478	2810.93
133	WD40	Death	458	77	0	0.488372	510.009	71.2292	0.998625	260.935	36.4428	0.510925	2806.1
134	RhoGAP	RRM_1	17598	814	1	0.278505	758.764	4.74225	1	547.445	3.42151	0.721495	2785.11
135	KH_1	RRM_1	50327	1250	1	0.244486	1026.36	2.94263	1	775.426	2.2232	0.755514	2779
136	RRM_1	CPSF_A	13235	209	0	0.368359	486.55	21.0003	0.99175	307.325	13.2646	0.62643	2772.31
137	Ank	Helicase_C	16190	1445	0	0.636842	85.6094	5.24539	1	31.0897	1.90491	0.363158	2752.59
138	Pkinase	Cyclin_N	686	115	1	0.37931	271.697	38.4549	1	168.64	23.8686	0.62069	2744.89
139	DEAD	UCH	4940	433	0	0.397516	197.034	10.4299	1	118.71	6.28386	0.602484	2720.91
140	PHD	ARID	1767	161	1	0.28	698.506	23.4428	0.999834	502.924	16.8788	0.719881	2717.49
141	Ank	PH	1302	172	1	0.28	688.54	21.8046	1	495.749	15.6993	0.72	2700.28
142	BTB	Helicase_C	8244	791	0	0.59432	111.367	8.32659	1	45.1793	3.37793	0.40568	2671.94
143	Myb_DNA-binding	RRM_1	32985	871	0	0.339844	371.264	4.59591	1	245.092	3.03402	0.660156	2642.63
144	BAH	RRM_1	22048	600	0	0.371134	266.838	6.96682	1	167.805	4.38119	0.628866	2628.72
145	SNF2_N	Bromodomain	5735	273	1	0.459916	348.108	17.5197	1	188.008	9.46211	0.540084	2583.16
146	Pkinase	Bromodomain	5144	536	1	0.656805	193.277	14.0242	1	66.3318	4.81303	0.343195	2579.78
147	WD40	G-patch	4334	377	0	0.492958	99.1136	13.4136	1	50.2548	6.80126	0.507042	2564.08
148	WD40	CPSF_A	4938	200	1	0.539163	371.347	27.6948	1	171.13	12.7628	0.460837	2552.56
149	SH3_1	KH_1	1493	228	0	0.6	465.021	27.9573	0.999996	186.008	11.1829	0.399998	2549.71
150	WD40	DUF1605	6765	381	0	0.488764	173.001	12.8211	0.999656	88.4441	6.55463	0.51106	2497.31
151	WD40	HA2	6765	381	1	0.488764	173.001	12.8211	0.999656	88.4441	6.55463	0.51106	2497.31
152	WD40	GATA	9669	451	0	0.496333	310.875	10.9874	1	156.577	5.53399	0.503667	2495.83
153	Ank	RRM_1	19155	1874	1	0.596154	77.8931	3.29222	1	31.4568	1.32955	0.403846	2491.58
154	WD40	PH	5915	693	1	0.560248	440.17	8.06634	1	193.566	3.54718	0.439752	2458.2
155	Helicase_C	PWI	12067	291	0	0.384785	343.63	13.5621	1	211.406	8.3436	0.615215	2427.99
156	SAP	DEAD	19023	472	0	0.421525	357.548	8.83753	1	206.833	5.1123	0.578475	2413
157	DEAD	Kinesin	24827	805	0	0.307432	1008.25	4.31303	1	698.279	2.98706	0.692568	2404.59
158	RRM_1	zf-C4	7167	521	1	0.523364	104.318	9.59571	1	49.7217	4.57366	0.476636	2382.88
159	RRM_1	Hormone_recep	7167	521	1	0.523364	104.318	9.59571	1	49.7217	4.57366	0.476636	2382.88
160	WD40	UCH	2529	298	1	0.461538	199.437	14.8258	1	107.389	7.98313	0.538462	2378.97
161	WD40	Ank	5970	815	0	0.666667	440.17	8.73189	1	146.723	2.91063	0.333333	2372.16
162	HEAT	Pkinase	8224	708	1	0.568733	200.87	7.74853	1	86.6286	3.34168	0.431267	2365.91
163	HMG_box	Myb_DNA-binding	3293	126	1	0.435169	1161.22	33.2369	1	655.894	18.7732	0.564831	2365.42
164	WD40	FHA	6556	453	1	0.464334	483.852	9.72742	1	259.183	5.21065	0.535666	2360.43
165	Helicase_C	dsrm	11914	371	1	0.399411	2119.76	10.5644	1	1273.1	6.34488	0.600589	2353.95
166	Pkinase	RhoGEF	3363	367	1	0.515152	255.599	13.1827	1	123.927	6.39163	0.484848	2345.73
167	WD40	BAH	8018	421	0	0.496333	310.875	10.9874	1	156.577	5.53399	0.503667	2329.81
168	AAA	PCI	2917	241	1	0.544828	105.582	21.2043	0.999279	48.0582	9.65163	0.454844	2326.04
169	WD40	PWI	5227	289	0	0.488372	245.28	15.7013	1	125.492	8.03321	0.511628	2321.6
170	AAA	SNF2_N	17659	465	0	0.386364	382.994	8.0552	1	235.019	4.94297	0.613636	2298.48
171	Bromodomain	Myb_DNA-binding	3880	155	1	0.351159	1574.64	22.6545	1	1021.69	14.6992	0.648841	2278.38
172	FHA	RRM_1	18361	789	0	0.398463	504.815	4.79319	1	303.665	2.88328	0.601537	2274.91
173	WD40	Chromo	6277	440	0	0.552448	229.986	11.4302	1	102.931	5.1156	0.447552	2250.86
174	FAT	RRM_1	11301	316	0	0.496821	348.487	14.154	1	175.352	7.12197	0.503179	2250.54
175	WD40	Arm	3227	283	1	0.259259	84.0001	10.6151	1	62.2223	7.86301	0.740741	2225.23
176	KH_1	DEAD	33747	610	1	0.192845	2499.27	4.50969	1	2017.3	3.64002	0.807155	2220.41
177	WD40	ELM2	7062	400	0	0.496333	310.875	10.9874	1	156.577	5.53399	0.503667	2213.6
178	WD40	zf-B_box	7774	461	0	0.546906	482.857	10.564	1	218.779	4.7865	0.453094	2206.58
179	WD40	LRR_1	4304	555	1	0.428571	439.535	6.79831	1	251.163	3.88475	0.571429	2156.03
180	WD40	PB1	1440	140	0	0.333333	100.906	23.0982	1	67.2705	15.3988	0.666667	2155.83
181	ARID	RRM_1	8392	592	1	0.526606	80.684	7.68532	1	38.1954	3.63819	0.473394	2153.81
182	SH3_2	Kinesin	970	120	0	0.811024	882.39	94.9637	0.999996	166.751	17.9459	0.188976	2153.51
183	Ank	Ank	684	112	1	0.384615	790.807	31.1774	1	486.651	19.1861	0.615385	2148.84
184	RRM_1	DUF618	20788	534	1	0.403766	391.103	6.74547	1	233.189	4.02188	0.596234	2147.68
185	Helicase_C	Cyclin_N	3050	258	0	0.636364	155.734	22.8454	0.999524	56.6306	8.30741	0.363463	2143.31
186	RRM_1	LSM	19045	771	1	0.566879	101.664	6.41722	1	44.0327	2.77943	0.433121	2142.94
187	RRM_1	Suf	3356	161	1	0.52518	423.137	27.9006	0.995871	200.914	13.2478	0.472859	2132.89
188	SPRY	DEAD	10817	560	1	0.57238	261.267	8.83753	1	111.723	3.7791	0.42762	2116.3
189	WD40	Tubulin	2459	177	0	0.362832	222.905	18.7445	1	142.028	11.9434	0.637168	2113.98
190	WD40	Tubulin_C	2459	177	0	0.362832	222.905	18.7445	1	142.028	11.9434	0.637168	2113.98
191	Helicase_C	HECT	6739	377	1	0.593985	481.018	13.7047	0.999988	195.3	5.5643	0.40601	2097.74
192	BRCT	DEAD	21023	388	1	0.256595	1860.39	7.23656	1	1383.02	5.3797	0.743405	2087.32
193	Pkinase	SMC_hinge	5157	385	1	0.578947	85.5283	12.8247	1	36.0119	5.39987	0.421053	2078.95
194	WD40	Kinesin	12202	857	0	0.52008	126.827	5.02456	1	60.867	2.41139	0.47992	2066.56
195	Pkinase	Cpn60_TCP1	1025	87	1	0.646778	127.204	67.2364	1	44.9313	23.7494	0.353222	2066.2
196	Ank	RhoGEF	1147	131	0	0.28	688.54	21.8046	1	495.749	15.6993	0.72	2056.61
197	CH	DEAD	17934	853	0	0.312375	678.489	3.48343	1	466.547	2.39529	0.687625	2043.18
198	Helicase_C	U6-snRNA_bdg	6337	77	0	0.3	4032.66	37.7626	0.994192	2822.86	26.4338	0.695934	2035.4
199	Helicase_C	PROCN	6337	77	0	0.3	4032.66	37.7626	0.994192	2822.86	26.4338	0.695934	2035.4
200	Helicase_C	PROCT	6337	77	0	0.3	4032.66	37.7626	0.994192	2822.86	26.4338	0.695934	2035.4
201	Helicase_C	RRM_4	6337	77	0	0.3	4032.66	37.7626	0.994192	2822.86	26.4338	0.695934	2035.4
202	Helicase_C	U5_2-snRNA_bdg	6337	77	0	0.3	4032.66	37.7626	0.994192	2822.86	26.4338	0.695934	2035.4
203	Helicase_C	PRO8NT	6337	77	0	0.3	4032.66	37.7626	0.994192	2822.86	26.4338	0.695934	2035.4
204	BTB	DEAD	6388	601	0	0.59432	111.367	8.32659	1	45.1793	3.37793	0.40568	2030.13
205	PH	Kinesin	2725	242	1	0.412168	420.719	14.2012	1	247.312	8.34794	0.587832	2020.2
206	Helicase_C	zf-RanBP	21043	497	0	0.445714	315.125	7.31915	1	174.669	4.0569	0.554286	2016.28
207	AAA	BRCT	10568	230	1	0.287445	1007.89	12.2233	1	718.177	8.70975	0.712555	2003.24
208	FHA	DEAD	11993	436	0	0.42522	644.732	7.97789	1	370.579	4.58553	0.57478	1999.29
209	DEAD	HATPase_c	21445	278	1	0.194194	6215.63	8.83931	0.999959	5008.59	7.12277	0.805773	1980.13
210	PHD	JmjC	1247	121	1	0.302326	698.506	23.4428	0.999559	487.33	16.3555	0.697367	1979.01
211	Pkinase	SMC_N	5033	364	1	0.578947	85.5283	12.8247	1	36.0119	5.39987	0.421053	1965.55
212	Ank	DEAD	12647	1080	0	0.653979	85.6094	5.24539	1	29.6226	1.81502	0.346021	1960.22
213	HEAT	DEAD	22595	573	0	0.388585	559.704	5.56989	0.998337	342.212	3.40551	0.610399	1951.36
214	Ank	zf-C3HC4	892	115	1	0.471264	447.342	31.8345	1	236.526	16.832	0.528736	1935.69
215	WD40	CortBP2	368	47	0	0.271028	1664.56	56.4821	0.997958	1213.42	41.1738	0.727484	1935.17
216	Ank	AAA	6720	606	1	0.707019	456.277	10.8154	1	133.68	3.16871	0.292981	1920.24
217	Biotin_lipoyl	RRM_1	12493	521	0	0.665844	366.89	10.9841	1	122.599	3.67041	0.334156	1912.28
218	PH	Helicase_C	16968	1344	0	0.417722	556.597	2.43806	1	324.095	1.41963	0.582278	1907.98
219	PHD	Chromo	3512	201	1	0.478854	186.232	18.1883	1	97.0543	9.47878	0.521146	1905.23
220	RRM_1	HATPase_c	31542	542	1	0.260469	3415.4	4.7449	1	2525.8	3.509	0.739531	1901.88
221	HEAT	PHD	6066	277	0	0.413439	265.931	11.6509	1	155.985	6.83398	0.586561	1893.01
222	WD40	Striatin	647	84	0	0.341463	577.639	33.9788	0.998443	380.396	22.3763	0.657511	1879.61
223	WD40	Spc97_Spc98	1255	135	0	0.311111	452.318	20.1516	0.999688	311.597	13.8822	0.688674	1874.1
224	WD40	zf-CCCH	6141	351	1	0.508772	243.602	10.8317	1	119.664	5.32084	0.491228	1867.62
225	FATC	RRM_1	8626	262	0	0.496821	348.487	14.154	1	175.352	7.12197	0.503179	1865.96
226	Mov34	PCI	801	85	1	0.444444	368.018	39.008	1	204.454	21.6711	0.555556	1842.04
227	WD40	BRCT	11213	551	1	0.430712	235.1	5.7862	1	133.84	3.29402	0.569288	1815
228	LRR_1	RRM_1	13449	1221	1	0.428571	134.507	2.59043	1	76.861	1.48025	0.571429	1807.38
229	WD40	LisH	1885	195	0	0.225806	209.903	11.8502	0.999841	162.506	9.17433	0.774071	1788.99
230	PHD	DEAD	30916	1047	0	0.33744	628.704	2.56702	1	416.554	1.7008	0.66256	1780.74
231	HEAT	C2	568	86	0	0.6	312.981	51.661	0.999881	125.192	20.6644	0.399952	1777.14
232	SMC_hinge	SMC_N	1009	21	1	0.328395	5226.65	125.226	0.996257	3510.24	84.1023	0.669091	1766.15
233	PCI	PCI	389	53	1	0.375	346.914	53.0806	0.997575	216.821	33.1754	0.623484	1758.29
234	Pkinase	C2	476	85	1	0.6	312.981	51.661	1	125.192	20.6644	0.4	1756.48
235	SNF2_N	SNF2_N	5290	181	1	0.468263	186.232	18.1883	1	99.0266	9.6714	0.531737	1750.52
236	Helicase_C	RNase_PH	15984	384	1	0.463235	207.438	8.4003	1	111.345	4.50899	0.536765	1731.45
237	PHD	SWIRM	3426	102	0	0.411236	986.66	28.7372	0.994274	580.91	16.9194	0.585393	1725.78
238	Actin	RRM_1	14560	621	0	0.524843	449.528	5.8374	1	213.596	2.77368	0.475157	1722.46
239	DEAD	PWI	9432	206	0	0.384785	343.63	13.5621	0.999225	211.406	8.3436	0.614738	1718.78
240	BRCT	zf-C3HC4	1397	102	1	0.471264	447.342	31.8345	0.999674	236.526	16.832	0.528563	1716.87
241	Helicase_C	HRDC	8864	154	1	0.384181	874.528	18.0257	0.998595	538.551	11.1005	0.614954	1709.48
242	WD40	RhoGEF	5352	481	1	0.560248	159.564	8.06634	1	70.1686	3.54718	0.439752	1706.2
243	BRCT	RRM_1	31562	797	1	0.274713	857.767	2.93929	1	622.128	2.13183	0.725287	1699.07
244	Helicase_C	CHDNT	6659	185	0	0.496561	186.232	18.1883	1	93.7566	9.15671	0.503439	1693.99
245	Helicase_C	DUF1087	6659	185	0	0.496561	186.232	18.1883	1	93.7566	9.15671	0.503439	1693.99
246	Helicase_C	DUF1086	6659	185	0	0.496561	186.232	18.1883	1	93.7566	9.15671	0.503439	1693.99
247	Helicase_C	CHDCT2	6659	185	0	0.496561	186.232	18.1883	1	93.7566	9.15671	0.503439	1693.99
248	DEAD	dsrm	9351	265	1	0.399411	2119.76	10.5644	1	1273.1	6.34488	0.600589	1681.39
249	AAA	HMG_box	8368	313	1	0.444279	509.454	9.65618	1	283.114	5.36614	0.555721	1679.6
250	WD40	DUF618	7066	384	0	0.532503	92.6892	9.31143	1	43.3319	4.35306	0.467497	1671.58
251	RRM_1	JmjC	6976	472	0	0.544554	144.068	7.68532	1	65.615	3.50025	0.455446	1652.12
252	Pkinase	ArfGap	1736	222	1	0.433962	257.999	13.122	1	146.037	7.42753	0.566038	1648.91
253	Cullin	RRM_1	6360	506	1	0.775449	52.1295	14.5096	1	11.7057	3.25813	0.224551	1648.62
254	WD40	AhpC-TSA	7204	370	1	0.59061	162.117	10.8656	1	66.3689	4.44825	0.40939	1645.85
255	WD40	1-cysPrx_C	7204	370	0	0.59061	162.117	10.8656	1	66.3689	4.44825	0.40939	1645.85
256	WD40	WW	6385	372	1	0.577488	155.717	10.4694	1	65.7922	4.42344	0.422512	1645.52
257	RRM_1	dsrm	16436	499	0	0.395939	751.544	5.44939	1	453.979	3.29176	0.604061	1642.59
258	Helicase_C	XPG_I	5816	170	1	0.479049	198.062	18.3383	1	103.181	9.55337	0.520951	1624.07
259	Helicase_C	XPG_N	5816	170	1	0.479049	198.062	18.3383	1	103.181	9.55337	0.520951	1624.07
260	WD40	FAT	4117	238	1	0.547926	747.801	15.0439	1	338.062	6.80096	0.452074	1618.63
261	SNF2_N	Chromo	3642	175	1	0.495751	186.232	18.1883	1	93.9075	9.17145	0.504249	1605
262	WD40	Suf	1215	98	1	0.418803	511.338	27.8749	0.999853	297.188	16.2008	0.581111	1587.68
263	HMG_box	ELM2	1970	91	0	0.476923	1161.22	33.2369	1	607.408	17.3854	0.523077	1582.07
264	WD40	NOSIC	5178	243	1	0.427259	171.438	11.2232	0.999522	98.1893	6.428	0.572467	1562
265	WD40	Nop	5178	243	1	0.427259	171.438	11.2232	0.999522	98.1893	6.428	0.572467	1562
266	DEAD	HECT	5158	278	1	0.593985	481.018	13.7047	0.999988	195.3	5.5643	0.40601	1546.88
267	PHD	zf-C2H2	2220	245	1	0.503896	131.494	12.7195	1	65.2348	6.31021	0.496104	1546
268	WD40	GTP_EFTU	5075	324	1	0.485543	375.823	9.14825	1	193.345	4.70638	0.514457	1524.87
269	RRM_1	SPOC	17849	419	0	0.35369	393.438	5.58761	1	254.283	3.61133	0.64631	1513.15
270	WD40	zf-RanBP	8856	475	0	0.518405	181.476	6.61075	1	87.398	3.18371	0.481595	1512.26
271	Helicase_C	MBD	2668	195	0	0.632768	239.257	21.1164	0.999366	87.8629	7.75461	0.366999	1512.15
272	WD40	Med26	3102	177	0	0.457045	243.602	15.7186	1	132.265	8.53451	0.542955	1510.61
273	Helicase_C	PI3_PI4_kinase	10047	304	1	0.469681	507.672	9.35132	1	269.228	4.95918	0.530319	1507.59
274	ARID	SNF2_N	1725	138	0	0.522963	934.17	22.8399	1	445.634	10.8955	0.477037	1503.58
275	G-patch	Helicase_C	11336	570	1	0.601958	227.888	6.62238	1	90.7092	2.63599	0.398042	1502.51
276	Helicase_C	BRK	13307	305	0	0.381818	340.195	7.96642	1	210.302	4.92469	0.618182	1502.03
277	RhoGAP	Helicase_C	15919	673	0	0.273846	1042.01	3.06439	1	756.656	2.22522	0.726154	1497.57
278	Helicase_C	EFG_C	7432	85	0	0.302152	1871.84	25.2185	0.963926	1306.26	17.5987	0.672674	1495.89
279	PHD	PWWP	2286	115	1	0.454044	698.506	23.4428	0.99999	381.353	12.7987	0.54595	1471.86
280	Helicase_C	PABP	7913	262	0	0.592417	481.018	13.7047	1	196.055	5.58579	0.407583	1463.48
281	RhoGEF	RRM_1	16217	1021	0	0.449091	372.451	2.59043	1	205.187	1.42709	0.550909	1457.06
282	SPRY	zf-B_box	1197	92	1	0.368421	322.854	24.9457	1	203.908	15.7551	0.631579	1449.47
283	WD40	GTP_EFTU_D2	5012	307	0	0.485543	375.823	9.14825	1	193.345	4.70638	0.514457	1444.86
284	PH	DEAD	13288	1005	1	0.417722	556.597	2.43806	1	324.095	1.41963	0.582278	1426.73
285	Helicase_C	EFG_IV	7414	80	0	0.302152	1871.84	25.2185	0.963926	1306.26	17.5987	0.672674	1407.89
286	DEAD	zf-RanBP	16053	346	0	0.445714	315.125	7.31915	1	174.669	4.0569	0.554286	1403.69
287	Pkinase	Proteasome	2138	357	1	0.63786	110.017	10.8453	1	39.8417	3.9275	0.36214	1402.12
288	ArfGap	CH	941	81	0	0.218391	728.653	21.8046	0.99715	569.522	17.0427	0.779382	1380.45
289	RRM_1	Surp	8864	353	0	0.435583	238.083	6.9257	1	134.378	3.90898	0.564417	1379.87
290	Pkinase	C1_1	2767	205	1	0.555556	88.8738	15.0984	0.998797	39.4995	6.71038	0.44391	1375.63
291	RhoGAP	AAA	6489	255	0	0.263717	678.358	7.28881	1	499.463	5.36663	0.736283	1368.49
292	SH3_2	RRM_1	6970	811	0	0.777778	214.369	7.56412	1	47.6375	1.68091	0.222222	1363.22
293	RRM_1	zf-UBR	3644	180	0	0.700617	470.362	25.1728	0.995486	140.818	7.53629	0.298031	1356.53
294	WD40	KH_1	17209	877	1	0.512048	238.873	3.16776	1	116.558	1.54571	0.487952	1355.59
295	RRM_1	IBN_N	20919	815	0	0.455867	307.485	3.05359	1	167.312	1.66156	0.544133	1354.17
296	14-3-3	Pkinase	6369	517	1	0.606612	133.264	6.65601	1	52.4247	2.6184	0.393388	1353.71
297	DEAD	PROCT	4954	51	0	0.3	4032.66	37.7626	0.970083	2822.86	26.4338	0.679058	1348.12
298	DEAD	PROCN	4954	51	0	0.3	4032.66	37.7626	0.970083	2822.86	26.4338	0.679058	1348.12
299	DEAD	PRO8NT	4954	51	0	0.3	4032.66	37.7626	0.970083	2822.86	26.4338	0.679058	1348.12
300	DEAD	U5_2-snRNA_bdg	4954	51	0	0.3	4032.66	37.7626	0.970083	2822.86	26.4338	0.679058	1348.12
301	DEAD	RRM_4	4954	51	0	0.3	4032.66	37.7626	0.970083	2822.86	26.4338	0.679058	1348.12
302	DEAD	U6-snRNA_bdg	4954	51	0	0.3	4032.66	37.7626	0.970083	2822.86	26.4338	0.679058	1348.12
303	Actin	SNF2_N	2720	129	0	0.565217	318.113	23.9923	1	138.31	10.4314	0.434783	1345.66
304	RhoGAP	KH_1	3574	149	0	0.266802	1062.33	12.2436	1	778.901	8.97699	0.733198	1337.57
305	SNF2_N	DEAD	33924	810	1	0.36518	340.195	2.5972	1	215.962	1.64875	0.63482	1335.49
306	RRM_1	zf-B_box	21445	777	0	0.353116	355.061	2.65601	1	229.683	1.71813	0.646884	1334.99
307	Kinesin	Kinesin	2407	135	1	0.405704	254.954	16.5137	0.999914	151.518	9.81406	0.594245	1324.9
308	Helicase_C	Ribosomal_L7Ae	12836	304	1	0.319654	660.871	6.39451	1	449.621	4.35048	0.680346	1322.54
309	Pkinase	SH3_2	1110	203	1	0.515152	255.599	13.1827	1	123.927	6.39163	0.484848	1297.5
310	PH	AAA	6922	531	0	0.431487	516.651	4.29373	1	293.723	2.44104	0.568513	1296.19
311	Chromo	ELM2	1598	68	0	0.492063	1499.61	37.4352	1	761.704	19.0147	0.507937	1293
312	WD40	SPOC	6264	302	0	0.441935	162.709	7.66868	1	90.8023	4.27962	0.558065	1292.45
313	SAP	PI3_PI4_kinase	1326	52	0	0.483254	1577.01	47.9097	1	814.916	24.7572	0.516746	1287.37
314	GTP_EFTU	RRM_1	14443	520	1	0.398917	620.23	4.09557	1	372.81	2.46178	0.601083	1280.13
315	Helicase_C	LSM	14046	516	1	0.503268	89.61	4.98982	1	44.5122	2.4786	0.496732	1278.96
316	Ank	SH3_2	456	81	0	0.28	688.54	21.8046	0.999943	495.749	15.6993	0.719959	1271.64
317	Chromo	GATA	2254	65	0	0.477537	1499.61	37.4352	0.998532	783.488	19.5585	0.521696	1271.3
318	Helicase_C	RNase_PH_C	10903	308	1	0.512821	207.438	8.4003	1	101.059	4.09246	0.487179	1260.48
319	Ank	ArfGap	584	86	1	0.375	623.716	23.4328	1	389.822	14.6455	0.625	1259.51
320	Helicase_C	DTHCT	23554	176	0	0.194194	6215.63	8.83931	0.999863	5008.59	7.12277	0.805695	1253.61
321	Helicase_C	DNA_topoisoIV	23554	176	0	0.194194	6215.63	8.83931	0.999863	5008.59	7.12277	0.805695	1253.61
322	Helicase_C	DNA_gyraseB	23554	176	1	0.194194	6215.63	8.83931	0.999863	5008.59	7.12277	0.805695	1253.61
323	SNF2_N	HMG_box	5051	235	1	0.459916	550.771	9.87076	1	297.463	5.33104	0.540084	1252.8
324	Pkinase	SNF2_N	10851	971	1	0.59673	72.9677	3.17152	1	29.4257	1.27898	0.40327	1241.89
325	HMG_box	SWIRM	1890	54	0	0.435169	1387.97	40.5612	0.992875	783.967	22.9102	0.560807	1237.15
326	Helicase_C	ZZ	3435	258	1	0.755981	197.13	19.6254	1	48.1035	4.78898	0.244019	1235.56
327	WD40	PRMT5	470	62	0	0.529412	547.429	42.3285	1	257.614	19.9193	0.470588	1235
328	WD40	FATC	3127	181	1	0.547926	747.801	15.0439	1	338.062	6.80096	0.452074	1230.97
329	CPSase_L_chain	RRM_1	6044	367	0	0.697674	366.89	10.9841	1	110.92	3.32078	0.302326	1218.73
330	CPSase_L_D2	RRM_1	6044	367	0	0.697674	366.89	10.9841	1	110.92	3.32078	0.302326	1218.73
331	Pkinase	DUF618	3918	347	0	0.622951	102.594	9.31143	1	38.6829	3.51087	0.377049	1218.27
332	BAH	Chromo	1702	64	0	0.492063	1499.61	37.4352	0.998765	761.704	19.0147	0.507309	1216.94
333	WD40	RMMBL	619	82	0	0.371429	306.624	23.6067	0.993155	192.735	14.8385	0.624269	1216.76
334	zf-C2H2	Myb_DNA-binding	1505	148	1	0.5	196.441	16.394	1	98.2203	8.197	0.5	1213.16
335	PH	ArfGap	682	71	1	0.218391	728.653	21.8046	0.999424	569.522	17.0427	0.781159	1210.03
336	Septin	Septin	1911	30	1	0.308874	1915.48	57.9347	0.986633	1323.84	40.0402	0.681888	1201.21
337	DEAD	RNase_PH	12633	266	1	0.463235	207.438	8.4003	1	111.345	4.50899	0.536765	1199.39
338	WD40	PI3K_C2	146	22	0	0.276596	996.305	75.3	0.999991	720.731	54.4723	0.723398	1198.39
339	WD40	PI3Ka	146	22	0	0.276596	996.305	75.3	0.999991	720.731	54.4723	0.723398	1198.39
340	Helicase_C	U-box	7020	181	0	0.484346	315.71	12.8211	1	162.797	6.61127	0.515654	1196.64
341	Helicase_C	JmjC	6300	408	0	0.509036	218.025	5.94183	1	107.043	2.91722	0.490964	1190.23
342	Helicase_C	Sec63	8276	117	1	0.380334	1606.14	16.3859	0.996616	995.27	10.1538	0.617569	1187.99
343	Pkinase	BRCT	6129	514	1	0.609065	66.4697	5.89155	1	25.9853	2.30321	0.390935	1183.85
344	Pkinase	SAP	5328	520	0	0.659138	94.7442	6.65856	1	32.2948	2.26965	0.340862	1180.22
345	RRM_1	Cullin_Nedd8	5399	360	0	0.775449	52.1295	14.5096	1	11.7057	3.25813	0.224551	1172.93
346	RRM_1	RMMBL	1897	171	0	0.587629	169.728	16.5645	0.99926	69.9908	6.83072	0.412066	1168.05
347	PH	PH	660	93	1	0.276596	495.426	17.304	0.999524	358.394	12.5178	0.72306	1164.15
348	AAA	PI3_PI4_kinase	3924	118	0	0.5	339.235	19.6977	0.99996	169.617	9.84887	0.49998	1162.17
349	RhoGEF	Kinesin	2500	163	0	0.412168	420.719	12.0711	0.999952	247.312	7.09578	0.587804	1156.61
350	DEAD	HRDC	6901	104	1	0.384181	874.528	18.0257	0.998595	538.551	11.1005	0.614954	1154.46
351	Pkinase	CBS	243	49	1	0.75	206.964	94.2204	0.999601	51.741	23.5551	0.2499	1154.2
352	WD40	CH	8838	817	0	0.560976	155.717	3.17572	1	68.3635	1.39422	0.439024	1139.08
353	RRM_1	GTP_EFTU_D2	14181	462	0	0.398917	620.23	4.09557	1	372.81	2.46178	0.601083	1137.34
354	Helicase_C	NOSIC	11596	212	0	0.389068	233.421	8.77201	1	142.604	5.3591	0.610932	1136.13
355	Helicase_C	Nop	11596	212	0	0.389068	233.421	8.77201	1	142.604	5.3591	0.610932	1136.13
356	RhoGEF	Helicase_C	14509	797	0	0.417722	556.597	2.43806	1	324.095	1.41963	0.582278	1131.44
357	Helicase_C	FAT	9406	228	1	0.469681	507.672	9.35132	1	269.228	4.95918	0.530319	1130.69
358	zf-C3HC4	RRM_1	12037	915	1	0.566443	216.412	2.84799	1	93.8271	1.23477	0.433557	1129.81
359	Helicase_C	P68HR	11604	88	0	0.218778	3636.81	16.3329	0.995596	2841.16	12.7596	0.777782	1122.85
360	WD40	Cullin	2270	273	1	0.702128	165.329	13.776	0.99999	49.247	4.10348	0.297869	1120.25
361	BTB	RRM_1	8710	973	0	0.647059	83.3951	3.25944	1	29.4336	1.15039	0.352941	1119.33
362	RRM_1	eIF-3c_N	1019	71	0	0.657143	137.553	45.5732	0.995806	47.1611	15.6251	0.341419	1109.38
363	RRM_1	eIF2A	3053	205	1	0.722628	139.44	19.4723	0.999826	38.6769	5.40108	0.277324	1107.22
364	RhoGAP	DEAD	12353	496	0	0.273846	1042.01	3.06439	1	756.656	2.22522	0.726154	1103.71
365	Pkinase	KH_1	10415	807	1	0.581731	138.289	3.26606	1	57.8422	1.36609	0.418269	1102.44
366	WD40	RNA_pol_Rpb1_4	3374	184	0	0.416901	212.302	10.2619	1	123.793	5.9837	0.583099	1101
367	WD40	RNA_pol_Rpb1_5	3374	184	0	0.416901	212.302	10.2619	1	123.793	5.9837	0.583099	1101
368	WD40	RNA_pol_Rpb1_2	3374	184	1	0.416901	212.302	10.2619	1	123.793	5.9837	0.583099	1101
369	WD40	RNA_pol_Rpb1_3	3374	184	0	0.416901	212.302	10.2619	1	123.793	5.9837	0.583099	1101
370	WD40	RNA_pol_Rpb1_1	3374	184	1	0.416901	212.302	10.2619	1	123.793	5.9837	0.583099	1101
371	Helicase_C	SWIB	3825	216	0	0.507692	251.209	10.2962	0.999984	123.672	5.06892	0.4923	1094.89
372	PH	RhoGEF	880	142	1	0.52381	168.334	15.8984	1	80.1592	7.57069	0.47619	1075.04
373	G-patch	DEAD	8858	407	0	0.601958	227.888	6.62238	1	90.7092	2.63599	0.398042	1072.85
374	Myb_DNA-binding	Myb_DNA-binding	1668	54	1	0.467543	894.245	37.1807	0.972614	476.147	19.7971	0.517875	1069.04
375	RRM_1	Spt5-NGN	560	61	0	0.860465	1053.11	125.151	0.999986	146.946	17.4629	0.139533	1065.24
376	RFX_DNA_binding	RRM_1	8698	339	0	0.526606	86.474	6.63274	0.999214	40.9363	3.1399	0.473022	1064.43
377	PHD	AAA	15756	547	0	0.36775	385.342	3.07363	1	243.633	1.9433	0.63225	1062.99
378	DEAD	EFG_C	5816	60	0	0.302152	1871.84	25.2185	0.963213	1306.26	17.5987	0.672177	1055.92
379	PHD	JmjN	390	64	1	0.302326	698.506	23.4428	0.999559	487.33	16.3555	0.697367	1046.75
380	SNF2_N	SWIRM	3715	71	0	0.351159	1574.64	22.6545	0.989791	1021.69	14.6992	0.642217	1043.64
381	Helicase_C	zf-B_box	18632	614	0	0.33744	451.325	2.56517	1	299.03	1.69958	0.66256	1043.54
382	Myb_DNA-binding	SWIRM	1829	38	1	0.467543	2413.81	51.372	0.971682	1285.25	27.3534	0.517379	1039.43
383	WD40	LSM	6560	473	1	0.636364	66.9889	5.99472	1	24.3596	2.1799	0.363636	1031.09
384	SAM_1	RRM_1	5235	645	0	0.764706	232.07	6.78498	1	54.6048	1.59647	0.235294	1029.72
385	AAA	CH	9538	488	0	0.352827	745.386	3.25404	1	482.394	2.10593	0.647173	1027.69
386	DEAD	PABP	6194	183	0	0.592417	481.018	13.7047	1	196.055	5.58579	0.407583	1022.2
387	PH	RhoGAP	1305	111	1	0.424172	371.378	15.8984	0.997485	213.849	9.15476	0.574379	1016.18
388	Bromodomain	SWIRM	2233	69	1	0.351159	1574.64	22.6545	0.999965	1021.69	14.6992	0.648819	1014.24
389	HEAT	Kinesin	5208	223	0	0.392555	535.212	7.48675	0.999993	325.112	4.54779	0.607441	1014.16
390	Bromodomain	PI3_PI4_kinase	1255	66	1	0.561927	678.031	34.9704	0.997805	297.027	15.3196	0.437112	1011.09
391	SMC_hinge	SMC_hinge	1006	12	1	0.328395	5226.65	125.226	0.996257	3510.24	84.1023	0.669091	1009.23
392	Helicase_C	Septin	24680	470	0	0.346657	658.452	3.28282	1	430.195	2.14481	0.653343	1008.06
393	Pkinase	UBA	1913	253	1	0.25	224.71	5.31149	1	168.533	3.98362	0.75	1007.86
394	Helicase_C	3_5_exonuc	6137	90	1	0.384181	874.528	18.0257	0.998595	538.551	11.1005	0.614954	999.049
395	SAP	FAT	1259	40	0	0.483254	1577.01	47.9097	0.995014	814.916	24.7572	0.51417	990.287
396	RhoGEF	ArfGap	653	58	0	0.218391	728.653	21.8046	0.998896	569.522	17.0427	0.780746	988.474
397	Homeobox	Helicase_C	4729	456	1	0.722222	312.72	7.75253	1	86.8668	2.15348	0.277778	981.987
398	Helicase_C	GTF2I	13547	141	0	0.224307	2233.87	8.96104	1	1732.8	6.95101	0.775693	980.093
399	AAA	Rep_fac_C	9068	100	1	0.22919	1776.84	12.7132	0.996396	1369.6	9.79947	0.768032	979.947
400	AAA	BAH	7248	166	1	0.39096	509.454	9.65618	0.985329	310.278	5.881	0.600105	976.247
401	ARID	HMG_box	924	82	0	0.572901	297.301	27.7774	0.99976	126.977	11.8637	0.426996	972.823
402	DEAD	EFG_IV	5798	55	0	0.302152	1871.84	25.2185	0.963213	1306.26	17.5987	0.672177	967.927
403	RRM_1	S1	10761	391	0	0.474966	160.082	4.71196	1	84.0482	2.47394	0.525034	967.309
404	Pkinase	Myb_DNA-binding	5862	504	0	0.688525	97.4286	6.15412	1	30.3466	1.91686	0.311475	966.096
405	LIM	RRM_1	15651	1018	0	0.534536	222.549	2.03525	1	103.588	0.947334	0.465464	964.386
406	ARID	Bromodomain	1178	86	0	0.522963	934.17	23.4428	0.999783	445.634	11.1831	0.476934	961.746
407	PHD	Hist_deacetyl	3135	86	1	0.402413	882.152	18.6805	0.999685	527.162	11.1632	0.597399	960.036
408	Pkinase	CPSF_A	2609	194	0	0.727273	116.166	18.0408	0.999669	31.6816	4.92023	0.272637	954.525
409	WD40	FH2	3515	277	0	0.644444	94.2653	9.69073	1	33.5165	3.44559	0.355556	954.429
410	SH2	RRM_1	7568	708	0	0.714286	72.4288	4.71196	1	20.694	1.34627	0.285714	953.161
411	WD40	DUF1241	1210	76	0	0.710575	590.968	43.0791	0.999889	171.041	12.4682	0.289393	947.581
412	PAM2	RRM_1	1148	158	1	0.736264	383.396	22.6881	0.99926	101.115	5.98367	0.263541	945.42
413	WD40	Hist_deacetyl	6074	249	1	0.496344	361.702	7.51893	0.999644	182.173	3.78695	0.503476	942.95
414	Helicase_C	SMK-1	217	46	0	0.764706	906.117	86.8546	0.996702	213.204	20.4364	0.234518	940.073
415	Pkinase	FYVE	275	54	0	0.742857	127.204	67.2364	1	32.7096	17.2894	0.257143	933.626
416	DEAD	LSM	11003	376	1	0.503268	89.61	4.98982	1	44.5122	2.4786	0.496732	931.955
417	Helicase_C	TIP49	23054	170	0	0.254987	1209.38	7.32212	0.960329	901.007	5.45507	0.715457	927.363
418	RRM_1	NOSIC	14153	291	0	0.430642	232.056	5.59372	0.99087	132.123	3.18483	0.56416	926.785
419	RRM_1	Nop	14153	291	0	0.430642	232.056	5.59372	0.99087	132.123	3.18483	0.56416	926.785
420	WD40	Mob1_phocein	1232	97	0	0.322581	111.166	14.0605	0.993901	75.3058	9.52485	0.673288	923.91
421	DEAD	Ribosomal_L7Ae	10112	211	1	0.319654	660.871	6.39451	1	449.621	4.35048	0.680346	917.95
422	RRM_1	Histone	22692	1001	1	0.505477	248.851	1.84004	1	123.063	0.909941	0.494523	910.851
423	DEAD	ZZ	2703	190	0	0.755981	197.13	19.6254	1	48.1035	4.78898	0.244019	909.906
424	AAA	FAT	3657	92	0	0.5	339.235	19.6977	0.997241	169.617	9.84887	0.49862	906.096
425	WD40	Histone	8280	604	1	0.52381	125.104	3.13665	1	59.5731	1.49364	0.47619	902.159
426	zf-C2H2	ELM2	1008	110	0	0.5	196.441	16.394	0.999732	98.2203	8.197	0.499866	901.67
427	RRM_1	EMG1	827	71	0	0.75	214.094	50.5853	0.99999	53.5235	12.6463	0.249998	897.889
428	WD40	PDZ	3445	470	0	0.727273	439.535	6.99031	1	119.873	1.90645	0.272727	896.031
429	WD40	DUF1086	2858	175	0	0.552448	229.986	11.4302	0.99935	102.931	5.1156	0.447261	895.23
430	WD40	DUF1087	2858	175	0	0.552448	229.986	11.4302	0.99935	102.931	5.1156	0.447261	895.23
431	WD40	CHDNT	2858	175	0	0.552448	229.986	11.4302	0.99935	102.931	5.1156	0.447261	895.23
432	WD40	CHDCT2	2858	175	0	0.552448	229.986	11.4302	0.99935	102.931	5.1156	0.447261	895.23
433	RRM_1	zf-CCHC	4149	376	1	0.619048	73.5719	6.21729	1	28.0274	2.36849	0.380952	890.553
434	Helicase_C	zf-GRF	1465	81	0	0.76087	764.462	45.6517	0.990072	182.806	10.9167	0.236756	884.253
435	WD40	zf-C3HC4	4200	423	1	0.638862	102.232	5.7862	1	36.92	2.08962	0.361138	883.91
436	WD40	Drf_FH3	3391	256	0	0.644444	94.2653	9.69073	1	33.5165	3.44559	0.355556	882.072
437	WD40	Drf_GBD	3391	256	0	0.644444	94.2653	9.69073	1	33.5165	3.44559	0.355556	882.072
438	DEAD	RNase_PH_C	8619	215	1	0.512821	207.438	8.4003	1	101.059	4.09246	0.487179	879.878
439	RRM_1	DUSP	366	80	0	0.769231	426.193	47.5748	0.994522	98.3522	10.9788	0.229505	878.304
440	SH3_1	SH2	171	40	1	0.125	361.918	25.0851	1	316.678	21.9495	0.875	877.979
441	Helicase_C	FATC	7166	189	1	0.469681	507.672	8.75269	1	269.228	4.64171	0.530319	877.284
442	RRM_1	DNA_topoisoIV	27580	248	1	0.260469	3415.4	4.7449	0.99953	2525.8	3.509	0.739184	870.233
443	RRM_1	DTHCT	27580	248	0	0.260469	3415.4	4.7449	0.99953	2525.8	3.509	0.739184	870.233
444	RRM_1	DNA_gyraseB	27580	248	1	0.260469	3415.4	4.7449	0.99953	2525.8	3.509	0.739184	870.233
445	DEAD	DTHCT	18716	122	0	0.194194	6215.63	8.83931	0.999863	5008.59	7.12277	0.805695	868.978
446	DEAD	DNA_topoisoIV	18716	122	0	0.194194	6215.63	8.83931	0.999863	5008.59	7.12277	0.805695	868.978
447	DEAD	DNA_gyraseB	18716	122	0	0.194194	6215.63	8.83931	0.999863	5008.59	7.12277	0.805695	868.978
448	ELM2	GATA	2030	55	1	0.343343	846.344	24.0535	0.97856	555.758	15.7949	0.642578	868.718
449	PHD	zf-C5HC2	348	53	1	0.302326	698.506	23.4428	0.999559	487.33	16.3555	0.697367	866.839
450	PHD	PLU-1	348	53	0	0.302326	698.506	23.4428	0.999559	487.33	16.3555	0.697367	866.839
451	Helicase_C	ubiquitin	10930	563	1	0.444444	267.595	2.76769	1	148.664	1.5376	0.555556	865.671
452	Pkinase	PHD	9203	934	0	0.627566	119.606	2.46853	1	44.5455	0.919364	0.372434	858.686
453	Bromodomain	FAT	1196	56	1	0.561927	678.031	34.9704	0.997805	297.027	15.3196	0.437112	857.897
454	Pkinase	Pkinase_C	846	162	1	0.25	495.426	7.05648	0.998625	371.57	5.29236	0.748969	857.363
455	BTB	AAA	3428	315	0	0.608629	164.534	6.95379	1	64.3937	2.72151	0.391371	857.277
456	TPR_1	TPR_1	647	77	1	0.292035	259.573	15.7048	1	183.769	11.1184	0.707965	856.119
457	WD40	ubiquitin	4922	448	1	0.675862	224.71	5.88966	1	72.8371	1.90906	0.324138	855.259
458	DEAD	U-box	5544	129	0	0.484346	315.71	12.8211	1	162.797	6.61127	0.515654	852.854
459	RRM_1	Proteasome	11510	895	0	0.707602	38.66	3.24623	1	11.3041	0.949191	0.292398	849.526
460	PWWP	RRM_1	12538	489	0	0.389297	318.372	2.84077	1	194.431	1.73487	0.610703	848.35
461	Helicase_C	Toprim	899	78	0	0.762712	764.462	45.6517	0.997949	181.398	10.8326	0.236801	844.943
462	Helicase_C	Topoisom_bac	899	78	0	0.762712	764.462	45.6517	0.997949	181.398	10.8326	0.236801	844.943
463	HEAT	FYVE	300	42	0	0.560976	226.399	45.8034	0.997701	99.3948	20.1088	0.438015	844.571
464	Helicase_C	PMC2NT	6077	76	0	0.384181	874.528	18.0257	0.982699	538.551	11.1005	0.605165	843.641
465	Helicase_C	zf-UBP	3060	134	0	0.397516	197.034	10.4299	0.997832	118.71	6.28386	0.601178	842.037
466	PI3_PI4_kinase	HMG_box	1139	57	0	0.577626	678.031	34.9704	0.999694	286.383	14.7706	0.422245	841.924
467	SMC_N	SMC_N	938	10	1	0.328395	5226.65	125.226	0.996257	3510.24	84.1023	0.669091	841.023
468	KH_1	SNF2_N	9875	250	0	0.475692	331.851	6.40037	1	173.992	3.35576	0.524308	838.94
469	ELM2	SWIRM	1490	29	0	0.437011	2413.81	51.372	0.971682	1358.95	28.9219	0.547046	838.734
470	C1_1	Helicase_C	12843	376	0	0.273846	1042.01	3.06439	1	756.656	2.22522	0.726154	836.682
471	Helicase_C	HSA	10352	226	0	0.381818	340.195	5.96114	0.999649	210.302	3.68507	0.617965	832.826
472	AAA	C1_1	5225	155	0	0.263717	678.358	7.28881	1	499.463	5.36663	0.736283	831.827
473	Bromodomain	HMG_box	2776	156	1	0.459916	550.771	9.87076	0.999979	297.463	5.33104	0.540073	831.643
474	DEAD	JmjC	4706	285	0	0.509036	218.025	5.94183	1	107.043	2.91722	0.490964	831.408
475	C1_1	RRM_1	14336	462	1	0.278505	758.764	2.49303	1	547.445	1.79871	0.721495	831.003
476	RRM_1	F-box	1274	198	0	0.833333	470.362	25.1728	0.99995	78.3936	4.19546	0.166658	830.701
477	WD40	Metallophos	4978	375	1	0.569405	194.993	5.14291	1	83.963	2.21451	0.430595	830.442
478	Helicase_C	TPR_1	14015	987	1	0.584416	174.66	2.01816	1	72.5862	0.838717	0.415584	827.814
479	RhoGEF	DEAD	11128	581	0	0.417722	556.597	2.43806	1	324.095	1.41963	0.582278	824.805
480	Pkinase	SH2	2013	273	1	0.602273	92.9871	7.58942	1	36.9835	3.01852	0.397727	824.056
481	SAP	Kinesin	3748	170	0	0.422961	243.811	8.38123	0.999999	140.688	4.8363	0.577039	822.171
482	SAP	SAP	1402	58	1	0.628866	531.798	38.135	0.997181	197.368	14.1532	0.370088	820.886
483	WD40	PFK	2826	203	1	0.710112	103.076	13.8972	1	29.8804	4.02863	0.289888	817.812
484	SAP	FATC	972	33	0	0.483254	1577.01	47.9097	0.995014	814.916	24.7572	0.51417	816.987
485	DEAD	Sec63	6291	80	1	0.380334	1606.14	16.3859	0.912695	995.27	10.1538	0.565566	812.303
486	Pkinase	SAM_2	662	135	1	0.4	87.6498	10.0208	1	52.5899	6.01247	0.6	811.684
487	TPR_1	Kinesin	2280	204	0	0.545455	177.299	8.74999	1	80.5903	3.97727	0.454545	811.363
488	SH3_1	Helicase_C	6518	972	1	0.777778	68.198	3.75193	1	15.1551	0.833762	0.222222	810.417
489	Arm	RRM_1	9890	522	1	0.56044	243.29	3.5315	1	106.941	1.55231	0.43956	810.303
490	PHD	Kinesin	6362	307	0	0.363636	420.234	4.14757	1	267.422	2.63936	0.636364	810.283
491	Myb_DNA-binding	BRK	2099	55	0	0.351159	1574.64	22.6545	0.993838	1021.69	14.6992	0.644843	808.456
492	KH_1	C1_1	2869	90	0	0.266802	1062.33	12.2436	0.998695	778.901	8.97699	0.732241	807.929
493	PHD	BRCT	5616	212	0	0.33783	323.188	5.75522	1	214.006	3.81094	0.66217	807.919
494	Helicase_C	DUF618	18013	366	0	0.363337	309.294	3.46563	0.999906	196.916	2.20644	0.636603	807.558
495	Helicase_C	zf-CCCH	14447	432	0	0.325275	299.999	2.75732	1	202.417	1.86044	0.674725	803.709
496	WD40	SAM_1	1548	253	1	0.727273	461.113	11.6127	1	125.758	3.16711	0.272727	801.279
497	Cyclin_N	RRM_1	3649	318	1	0.663866	105.625	7.44288	1	35.504	2.50181	0.336134	795.575
498	WD40	HMG_box	9438	655	1	0.525988	123.341	2.55983	1	58.4649	1.21339	0.474012	794.771
499	AAA	Mov34	4953	167	1	0.442023	223.788	8.52259	0.999814	124.868	4.75541	0.557874	794.154
500	PHD	HLH	671	91	1	0.5	144.459	17.4065	0.999811	72.2297	8.70327	0.499905	791.997
501	Pkinase	2OG-FeII_Oxy	1975	198	0	0.698514	222.196	13.1668	1	66.9889	3.96962	0.301486	785.984
502	WD40	DUF1546	1501	98	0	0.675573	395.185	24.5322	1	128.209	7.95893	0.324427	779.976
503	WD40	TAF	1501	98	1	0.675573	395.185	24.5322	1	128.209	7.95893	0.324427	779.976
504	Bromodomain	Bromodomain	1535	92	1	0.346939	493.453	12.9717	0.999898	322.255	8.47134	0.652994	779.364
505	DEAD	P68HR	9014	61	0	0.218778	3636.81	16.3329	0.987738	2841.16	12.7596	0.771643	778.336
506	DEAD	NOSIC	9055	145	0	0.389068	233.421	8.77201	1	142.604	5.3591	0.610932	777.07
507	DEAD	Nop	9055	145	0	0.389068	233.421	8.77201	1	142.604	5.3591	0.610932	777.07
508	RRM_1	Septin	28845	664	0	0.345133	565.961	1.78637	1	370.629	1.16983	0.654867	776.769
509	WD40	zf-CCHC	1196	157	1	0.508772	42.6753	10.0549	0.999927	20.9633	4.93923	0.491192	775.46
510	RRM_1	Fip1	8229	109	0	0.369246	285.044	11.2166	0.999986	179.793	7.0749	0.630745	771.165
511	PH	C1_1	1105	88	1	0.424172	371.378	15.0984	0.995933	213.849	8.69405	0.573486	765.077
512	WD40	B-block_TFIIIC	2039	91	0	0.545008	115.619	18.4507	1	52.6058	8.39493	0.454992	763.939
513	WD40	Cullin_Nedd8	1968	217	0	0.744856	165.329	13.776	0.99999	42.1828	3.51486	0.255142	762.724
514	Pkinase	PI3K_C2	69	14	0	0.276596	996.305	75.3	1	720.731	54.4723	0.723404	762.613
515	Pkinase	PI3Ka	69	14	0	0.276596	996.305	75.3	1	720.731	54.4723	0.723404	762.613
516	DEAD	zf-B_box	14513	447	0	0.33744	451.325	2.56517	1	299.03	1.69958	0.66256	759.711
517	BAH	GATA	2084	48	1	0.343343	846.344	24.0535	0.999887	555.758	15.7949	0.656582	758.154
518	DEAD	SMK-1	183	37	0	0.764706	906.117	86.8546	0.996702	213.204	20.4364	0.234518	756.146
519	Pkinase	zf-RanBP	4580	413	0	0.628942	122.63	4.93247	0.999947	45.5029	1.83023	0.371038	755.884
520	AAA	zf-B_box	7674	241	0	0.36775	360.146	4.93723	0.999711	227.702	3.12156	0.632067	752.296
521	AAA	Myb_DNA-binding	10794	264	0	0.348936	419.613	4.32281	1	273.195	2.81443	0.651064	743.009
522	RRM_1	RNase_PH	20807	543	0	0.471924	202.086	2.58622	1	106.717	1.36572	0.528076	741.587
523	RhoGAP	RhoGEF	1189	81	1	0.424172	371.378	15.8984	1	213.849	9.15476	0.575828	741.536
524	BRCT	BRCT	1419	40	1	0.418508	470.678	31.8345	0.962632	273.696	18.5115	0.559762	740.461
525	PH	FHA	1357	132	1	0.60515	250.67	14.2012	1	98.9772	5.60735	0.39485	740.171
526	FHA	Kinesin	2498	143	1	0.517364	397.047	10.7176	0.999914	191.629	5.1727	0.482594	739.696
527	AAA	FATC	2821	75	0	0.5	339.235	19.6977	0.99996	169.617	9.84887	0.49998	738.665
528	Pkinase	FHA	3485	364	1	0.555556	106.676	4.56561	1	47.4115	2.02916	0.444444	738.614
529	HEAT	Metallophos	1752	88	1	0.6	161.077	20.9437	0.995871	64.4308	8.37747	0.398348	737.217
530	Kinesin	Guanylate_kin	411	41	0	0.811024	882.39	94.9637	0.999996	166.751	17.9459	0.188976	735.782
531	WD40	Fip1	2878	103	1	0.476584	368.874	13.6245	1	193.075	7.13126	0.523416	734.52
532	GTP_EFTU	Mov34	813	37	0	0.338618	1695.03	29.7917	0.994192	1121.06	19.7037	0.65754	729.037
533	SPRY	SPRY	428	46	1	0.368421	322.854	24.9457	1	203.908	15.7551	0.631579	724.737
534	RRM_1	Med26	8462	234	0	0.48285	184.369	5.97952	0.999688	95.3464	3.09231	0.516989	723.601
535	TPR_1	Paf1	78	11	0	0.367089	1476.81	103.915	0.993163	934.689	65.7691	0.628584	723.46
536	HMG_box	DEAD	16600	562	0	0.459716	247.374	2.3762	1	133.652	1.28382	0.540284	721.508
537	HEAT	Cullin	1155	85	1	0.685279	300.378	26.9319	1	94.5352	8.47604	0.314721	720.463
538	Helicase_C	RasGAP	12863	300	0	0.312375	678.489	3.48343	1	466.547	2.39529	0.687625	718.588
539	WD40	SMC_hinge	7710	414	0	0.549072	138.732	3.8489	1	62.558	1.73558	0.450928	718.53
540	HATPase_c	HATPase_c	1291	22	1	0.248464	8231.31	43.4244	0.999537	6186.13	32.635	0.751189	717.97
541	PH	Myb_DNA-binding	2282	208	0	0.506151	157.381	6.98933	0.999984	77.7226	3.45167	0.493841	717.948
542	Bromodomain	JmjC	823	69	0	0.556818	698.506	23.4428	1	309.565	10.3894	0.443182	716.871
543	WD40	HRDC	3986	177	0	0.480808	194.967	7.79459	1	101.225	4.04689	0.519192	716.299
544	RFX_DNA_binding	Helicase_C	7443	257	1	0.520179	170.035	5.793	1	81.5864	2.7796	0.479821	714.357
545	RRM_1	zf-CXXC	2233	239	0	0.538462	48.3822	6.47128	1	22.3302	2.98674	0.461538	713.832
546	RRM_1	Linker_histone	19803	592	1	0.41844	164.063	2.07257	1	95.4127	1.20532	0.58156	713.551
547	Helicase_C	Histone	17927	707	1	0.466667	211.53	1.88999	1	112.816	1.00799	0.533333	712.652
548	FAT	HMG_box	1083	48	0	0.577626	678.031	34.9704	0.999694	286.383	14.7706	0.422245	708.989
549	SNF2_N	zf-C2H2	2337	242	0	0.550069	69.4999	6.49448	1	31.2702	2.92207	0.449931	707.141
550	Ank	PHD	3193	355	0	0.681013	155.942	6.22803	1	49.7436	1.98666	0.318987	705.265
551	WD40	ARID	2959	295	0	0.524008	94.6518	5.01768	1	45.0534	2.38837	0.475992	704.57
552	Pkinase	HECT	1636	201	0	0.643636	308.184	9.83118	0.999882	109.826	3.50348	0.356322	704.199
553	PHD	DUF1087	1511	74	0	0.478854	186.232	18.1883	0.985361	97.0543	9.47878	0.513517	701.429
554	PHD	DUF1086	1511	74	0	0.478854	186.232	18.1883	0.985361	97.0543	9.47878	0.513517	701.429
555	PHD	CHDCT2	1511	74	0	0.478854	186.232	18.1883	0.985361	97.0543	9.47878	0.513517	701.429
556	PHD	CHDNT	1511	74	0	0.478854	186.232	18.1883	0.985361	97.0543	9.47878	0.513517	701.429
557	SNF2_N	Hist_deacetyl	3407	67	0	0.439799	882.152	18.6805	0.999685	494.182	10.4648	0.560024	701.142
558	Helicase_C	Rep_fac_C	29896	260	0	0.246663	927.244	3.56931	1	698.527	2.68889	0.753337	699.112
559	ArfGap	SH3_2	279	41	0	0.218391	728.653	21.8046	0.999943	569.522	17.0427	0.781565	698.749
560	RRM_1	zf-RNPHF	16962	311	1	0.424658	187.769	3.90217	0.998268	108.031	2.24509	0.574346	698.222
561	MCM	MCM	321	15	1	0.377049	658.671	74.3705	0.998216	410.32	46.3292	0.621839	694.938
562	Pkinase	XPG_I	1436	124	0	0.579961	48.0092	13.3022	0.9991	20.1657	5.58742	0.419661	692.841
563	Pkinase	XPG_N	1436	124	1	0.579961	48.0092	13.3022	0.9991	20.1657	5.58742	0.419661	692.841
564	PHD	CH	4452	307	0	0.320513	341.01	3.31401	1	231.712	2.25183	0.679487	691.311
565	Kinesin	HATPase_c	4234	112	0	0.385908	1990.74	10.0476	0.950748	1222.5	6.17013	0.583847	691.055
566	Mov34	GTP_EFTU_D2	806	35	0	0.338618	1695.03	29.7917	0.994192	1121.06	19.7037	0.65754	689.63
567	RRM_1	eIF3_N	597	58	0	0.725	211.088	43.1304	0.999089	58.0491	11.8609	0.27475	687.93
568	Pkinase	Proteasome_A_N	1125	191	0	0.63786	50.5024	9.93885	1	18.2889	3.59926	0.36214	687.458
569	RRM_1	cwf21	8538	209	0	0.527174	238.083	6.9257	0.996591	112.572	3.27465	0.471214	684.402
570	Bromodomain	PWWP	1372	80	1	0.474286	493.453	16.261	0.998906	259.415	8.54862	0.525139	683.89
571	RRM_1	eIF-3_zeta	585	60	0	0.6875	94.5949	36.4278	0.997324	29.5609	11.3837	0.311664	683.021
572	RRM_1	Collagen	938	97	0	0.654321	326.371	20.2969	1	112.819	7.01623	0.345679	680.574
573	DEAD	Septin	18919	317	0	0.346657	658.452	3.28282	1	430.195	2.14481	0.653343	679.903
574	DEAD	3_5_exonuc	4874	61	1	0.384181	874.528	18.0257	0.998595	538.551	11.1005	0.614954	677.133
575	RhoGAP	CH	1826	119	0	0.377778	413.201	9.11506	1	257.103	5.67159	0.622222	674.92
576	Helicase_C	Linker_histone	14684	431	0	0.346237	190.987	2.39252	0.999827	124.86	1.56414	0.65365	674.145
577	Arm	SPRY	590	58	0	0.241379	152.918	15.3206	0.998707	116.007	11.6225	0.757639	674.107
578	WD40	SWIRM	6598	278	1	0.524302	156.577	5.08706	0.998694	74.4835	2.4199	0.475077	672.733
579	WD40	SMC_N	7495	387	0	0.549072	138.732	3.8489	1	62.558	1.73558	0.450928	671.669
580	Helicase_C	PWWP	10775	350	0	0.352423	561.09	2.94282	0.999219	363.349	1.9057	0.647071	666.996
581	RRM_1	Metallophos	14240	588	1	0.512415	90.5335	2.32584	1	44.1428	1.13405	0.487585	666.819
582	14-3-3	Kinesin	4014	158	0	0.509124	249.963	8.59762	0.99992	122.701	4.22036	0.490837	666.817
583	Pkinase	IBN_N	5874	531	0	0.56087	93.9939	2.85422	1	41.2756	1.25337	0.43913	665.542
584	WD40	eIF2A	1061	117	1	0.694656	173.505	18.6242	0.999813	52.9787	5.68679	0.305286	665.354
585	WD40	TAFH	634	83	0	0.67619	321.508	24.7271	1	104.107	8.00689	0.32381	664.571
586	PCI	eIF2A	202	21	0	0.583893	404.915	75.5924	0.995806	168.488	31.4545	0.414362	660.545
587	Helicase_C	SMC_hinge	19608	349	0	0.388535	380.218	3.09495	0.999408	232.49	1.89245	0.611103	660.467
588	RRM_1	TFIIS_M	9874	182	0	0.35369	393.438	5.58761	0.988776	254.283	3.61133	0.639056	657.262
589	TPR_1	zf-CCCH	955	71	1	0.644252	225.476	25.9988	0.999295	80.2127	9.24902	0.355497	656.68
590	ARID	Myb_DNA-binding	1177	71	0	0.582649	912.876	22.0744	1	380.989	9.21278	0.41735	654.107
591	Pkinase	RA	875	102	1	0.641577	78.537	17.8391	1	28.1495	6.39393	0.358423	652.181
592	Pkinase	PWI	2421	227	0	0.62592	58.3765	7.67657	1	21.8375	2.87165	0.37408	651.864
593	Helicase_C	NAP	4874	230	0	0.594533	145.26	6.97125	1	58.8982	2.82661	0.405467	650.121
594	C1_1	DEAD	10097	292	0	0.273846	1042.01	3.06439	1	756.656	2.22522	0.726154	649.763
595	Pkinase	LRR_1	3095	426	1	0.4	34.7887	2.52248	1	20.8732	1.51349	0.6	644.746
596	Helicase_C	DEAD_2	659	85	1	0.72	244.445	27.0846	0.998012	68.4446	7.58368	0.279443	644.613
597	Bromodomain	FATC	898	42	0	0.561927	678.031	34.9704	0.997805	297.027	15.3196	0.437112	643.423
598	SH3_1	RRM_1	7540	1219	1	0.6	47.8124	1.31927	1	19.125	0.527707	0.4	643.275
599	SAP	PHD	5334	251	0	0.439098	228.324	4.56455	1	128.067	2.56027	0.560902	642.627
600	SNF2_N	Kinesin	7543	310	0	0.383513	311.186	3.36188	1	191.843	2.07255	0.616487	642.492
601	WD40	IBN_N	7373	536	0	0.534247	87.564	2.56826	1	40.7832	1.19618	0.465753	641.15
602	RRM_1	2OG-FeII_Oxy	9557	382	0	0.642706	148.442	4.67585	0.999027	53.0374	1.67065	0.356946	638.19
603	RRM_1	FH2	10398	439	0	0.60049	138.981	3.62601	0.99998	55.5244	1.44863	0.399502	635.947
604	ArfGap	RRM_1	8299	585	1	0.67033	63.8775	3.29222	1	21.0585	1.08535	0.32967	634.928
605	TPR_1	CDC73	70	10	0	0.538462	1279.8	137.475	0.998198	590.677	63.45	0.460707	634.5
606	Pkinase	DEP	85	22	1	0.571429	127.204	67.2364	1	54.5161	28.8156	0.428571	633.944
607	HEAT	CH	4087	241	0	0.384615	1012.98	4.25982	1	623.374	2.62142	0.615385	631.764
608	WD40	PROCT	2880	101	0	0.443149	216.041	11.1781	0.999447	120.303	6.22453	0.556544	628.677
609	WD40	PROCN	2880	101	0	0.443149	216.041	11.1781	0.999447	120.303	6.22453	0.556544	628.677
610	WD40	U5_2-snRNA_bdg	2880	101	0	0.443149	216.041	11.1781	0.999447	120.303	6.22453	0.556544	628.677
611	WD40	RRM_4	2880	101	0	0.443149	216.041	11.1781	0.999447	120.303	6.22453	0.556544	628.677
612	WD40	PRO8NT	2880	101	0	0.443149	216.041	11.1781	0.999447	120.303	6.22453	0.556544	628.677
613	WD40	U6-snRNA_bdg	2880	101	0	0.443149	216.041	11.1781	0.999447	120.303	6.22453	0.556544	628.677
614	DEAD	zf-UBP	2432	100	0	0.397516	197.034	10.4299	0.997832	118.71	6.28386	0.601178	628.386
615	Adaptin_N	Helicase_C	7092	482	1	0.675325	68.7144	3.99698	0.999848	22.3099	1.29772	0.324626	625.502
616	RRM_1	P68HR	14581	127	0	0.234766	1343.85	6.42253	1	1028.36	4.91474	0.765234	624.172
617	RRM_1	Ribosomal_L7Ae	16946	440	1	0.368532	411.282	2.24209	0.999958	259.711	1.4158	0.631441	622.954
618	Helicase_C	PARP	13324	211	1	0.256595	1860.39	3.96946	1	1383.02	2.95092	0.743405	622.644
619	SPRY	zf-RanBP	1449	83	0	0.571984	317.163	17.4818	0.973815	135.751	7.48247	0.416808	621.045
620	WD40	RhoGAP	5787	377	1	0.531108	157.891	3.49791	1	74.0339	1.64014	0.468892	618.333
621	Chromo	RRM_1	18537	775	0	0.501832	129.756	1.60041	1	64.6406	0.797276	0.498168	617.889
622	Myb_DNA-binding	HSA	1715	42	0	0.351159	1574.64	22.6545	0.996482	1021.69	14.6992	0.646559	617.366
623	Pkinase	SAM_1	827	154	1	0.6	62.8904	10.0208	1	25.1562	4.00831	0.4	617.28
624	RRM_1	ELM2	19485	585	0	0.371134	266.838	1.67615	1	167.805	1.05407	0.628866	616.632
625	RRM_1	GATA	26949	584	0	0.371134	266.838	1.67615	1	167.805	1.05407	0.628866	615.578
626	WD40	Sec63	3708	137	0	0.490826	275.562	8.81164	1	140.309	4.48666	0.509174	614.672
627	ARID	PAH	143	15	0	0.302326	1624.69	58.6935	0.976383	1133.51	40.949	0.681197	614.235
628	IQ	DEAD	8562	255	0	0.312375	678.489	3.48343	1	466.547	2.39529	0.687625	610.799
629	WD40	2OG-FeII_Oxy	3307	262	0	0.71	52.9326	8.0379	1	15.3505	2.33099	0.29	610.72
630	HA2	Metallophos	897	45	0	0.554077	156.55	30.306	0.998221	69.8093	13.5142	0.44513	608.137
631	DUF1605	Metallophos	897	45	0	0.554077	156.55	30.306	0.998221	69.8093	13.5142	0.44513	608.137
632	HEAT	AAA	12197	340	0	0.416478	640.956	3.0607	0.999842	374.012	1.78599	0.58343	607.235
633	Proteasome	Proteasome	1234	103	1	0.465517	111.413	11.019	0.998121	59.5485	5.88948	0.533478	606.616
634	Helicase_C	PRP1_N	4240	73	0	0.399061	458.176	13.8119	0.976094	275.336	8.30009	0.586573	605.907
635	AAA	UQ_con	2520	164	0	0.726776	531.677	13.4908	1	145.267	3.68602	0.273224	604.508
636	Proteasome	Proteasome_A_N	919	109	1	0.5	111.413	11.019	0.998121	55.7067	5.50951	0.49906	600.537
637	Helicase_C	SMC_N	19070	323	0	0.388535	380.218	3.03974	0.999408	232.49	1.8587	0.611103	600.359
638	KH_1	LRR_1	2834	216	0	0.635036	121.611	7.59085	1	44.3837	2.77038	0.364964	598.403
639	WD40	RED_C	173	17	0	0.28125	212.397	48.9315	0.980519	152.66	35.1695	0.704748	597.881
640	WD40	RED_N	173	17	0	0.28125	212.397	48.9315	0.980519	152.66	35.1695	0.704748	597.881
641	PDZ	AAA	3823	375	1	0.784483	317.127	7.39161	1	68.3464	1.59302	0.215517	597.382
642	Chromo	Myb_DNA-binding	2347	102	1	0.58011	328.451	13.9254	0.993838	137.913	5.84714	0.417302	596.408
643	Helicase_C	SART-1	3352	75	0	0.421488	304.327	13.7076	0.999834	176.057	7.93002	0.578416	594.752
644	PH	Bromodomain	1919	202	0	0.464583	193.695	5.49097	1	103.708	2.93995	0.535417	593.871
645	RRM_1	Ras	14878	1100	1	0.629344	81.0118	1.45337	1	30.0276	0.538703	0.370656	592.573
646	WD40	U-box	2928	161	0	0.556021	174.398	8.27311	1	77.4292	3.67309	0.443979	591.367
647	RRM_1	BRK	15990	420	0	0.391144	292.013	2.31228	1	177.794	1.40785	0.608856	591.295
648	SAP	zf-RanBP	2816	79	0	0.571984	317.163	17.4818	0.998587	135.751	7.48247	0.427411	591.115
649	SAP	Histone	2551	133	0	0.56015	284.175	10.0985	1	124.994	4.4418	0.43985	590.76
650	SAP	KH_1	5253	145	0	0.422692	367.864	7.04101	1	212.371	4.06483	0.577308	589.4
651	WD40	Paf1	351	42	0	0.56962	280.686	32.5622	0.986057	120.802	14.0141	0.424379	588.592
652	DEAD	zf-CCCH	11297	316	0	0.325275	299.999	2.75732	0.996742	202.417	1.86044	0.672527	587.898
653	DEAD	Topoisom_bac	699	54	1	0.762712	764.462	45.6517	0.972695	181.398	10.8326	0.230809	584.961
654	DEAD	Toprim	699	54	1	0.762712	764.462	45.6517	0.972695	181.398	10.8326	0.230809	584.961
655	PHD	BRK	3160	122	0	0.395789	163.478	7.91897	1	98.7748	4.78473	0.604211	583.737
656	RRM_1	SWIRM	17722	313	0	0.339844	371.264	2.82087	1	245.092	1.86222	0.660156	582.874
657	Ank	RHD	245	46	1	0.59375	790.807	31.1774	1	321.265	12.6658	0.40625	582.628
658	Kinesin	zf-CCCH	2145	87	0	0.349275	218.292	10.2312	0.998278	142.048	6.65773	0.649604	579.222
659	WD40	Septin	10338	533	1	0.513514	126.936	2.22606	1	61.7528	1.08295	0.486486	577.212
660	BAH	Bromodomain	2366	102	1	0.397739	348.108	9.33806	0.998845	209.652	5.62395	0.601565	573.643
661	ARID	HDAC_interact	140	14	0	0.302326	1624.69	58.6935	0.976383	1133.51	40.949	0.681197	573.286
662	RRM_1	Rep_fac_C	34523	361	0	0.268398	636.919	2.16661	1	465.971	1.5851	0.731602	572.22
663	WD40	CDC73	381	44	0	0.67033	301.559	39.3941	0.958432	99.4152	12.9871	0.315967	571.431
664	WD40	HATPase_c	11287	415	1	0.453091	700.399	2.51654	1	383.055	1.37632	0.546909	571.171
665	zf-C2H2	SWIRM	844	79	0	0.558386	317.091	16.3481	1	140.032	7.21956	0.441614	570.345
666	Pkinase	Med26	1327	124	0	0.454545	74.1629	8.42984	1	40.4525	4.5981	0.545455	570.164
667	DEAD	zf-GRF	1085	54	0	0.769231	764.462	45.6517	0.990072	176.414	10.535	0.228478	568.89
668	WD40	ArfGap	2588	274	1	0.735849	440.17	7.79175	1	116.271	2.0582	0.264151	563.946
669	Helicase_C	Thioredoxin	7565	339	0	0.742424	223.063	6.44512	1	57.4556	1.66011	0.257576	562.776
670	DEAD	TPR_1	10796	713	1	0.609572	174.66	2.01816	1	68.1924	0.787948	0.390428	561.807
671	FATC	HMG_box	838	38	0	0.577626	678.031	34.9704	0.999694	286.383	14.7706	0.422245	561.283
672	WD40	TFIIS_M	3448	144	0	0.491824	162.709	7.66868	1	82.685	3.89704	0.508176	561.174
673	LIM	Helicase_C	13041	713	0	0.522624	201.452	1.64745	1	96.1682	0.786454	0.477376	560.742
674	WD40	TAF4	571	70	0	0.67619	321.508	24.7271	1	104.107	8.00689	0.32381	560.482
675	LIM	CH	1808	168	1	0.535608	138.837	7.17194	1	64.475	3.33059	0.464392	559.539
676	Helicase_C	Hormone_recep	6438	389	0	0.535714	94.8387	3.09674	1	44.0322	1.43778	0.464286	559.294
677	Helicase_C	zf-C4	6438	389	0	0.535714	94.8387	3.09674	1	44.0322	1.43778	0.464286	559.294
678	DEAD	DUF618	13554	253	0	0.363337	309.294	3.46563	0.999906	196.916	2.20644	0.636603	558.23
679	FHA	SNF2_N	3482	173	1	0.50655	110.909	6.53546	1	54.7281	3.22492	0.49345	557.911
680	DEAD	PMC2NT	4824	50	0	0.384181	874.528	18.0257	0.982699	538.551	11.1005	0.605165	555.027
681	Pkinase	PABP	2064	225	0	0.749333	308.184	9.83118	0.998556	77.2515	2.46435	0.250305	554.479
682	Helicase_C	Surp	6823	224	0	0.546667	518.79	5.44939	1	235.185	2.47039	0.453333	553.367
683	PHD	FHA	3283	187	0	0.418655	228.824	5.08532	1	133.026	2.95633	0.581345	552.833
684	WD40	Actin	5329	393	1	0.391304	210.802	2.30915	1	128.314	1.40557	0.608696	552.388
685	HMG_box	zf-C2H2	1044	123	1	0.625	117.621	11.9728	1	44.1079	4.48979	0.375	552.245
686	AAA	TPR_1	5787	416	1	0.629322	136.282	3.57856	1	50.5166	1.32649	0.370678	551.821
687	RRM_1	Drf_GBD	10011	380	0	0.60049	138.981	3.62601	0.99998	55.5244	1.44863	0.399502	550.478
688	RRM_1	Drf_FH3	10011	380	0	0.60049	138.981	3.62601	0.99998	55.5244	1.44863	0.399502	550.478
689	Pkinase	B-block_TFIIIC	1048	87	0	0.658635	115.619	18.4507	1	39.4684	6.29844	0.341365	547.965
690	WD40	Linker_histone	6885	416	0	0.53012	98.4249	2.80248	0.999797	46.2479	1.31683	0.469784	547.8
691	RRM_1	GUCT	15033	219	0	0.382032	997.159	4.03695	0.998092	616.212	2.4947	0.616789	546.34
692	WD40	SH3_2	2096	332	0	0.764706	266.471	6.99031	1	62.699	1.64478	0.235294	546.067
693	HEAT	PI3K_C2	85	10	0	0.276596	996.305	75.3	0.997788	720.731	54.4723	0.721804	544.723
694	HEAT	PI3Ka	85	10	0	0.276596	996.305	75.3	0.997788	720.731	54.4723	0.721804	544.723
695	HEAT	Cullin_Nedd8	1041	64	0	0.685279	300.378	26.9319	1	94.5352	8.47604	0.314721	542.466
696	PHD	HATPase_c	5261	139	0	0.435364	795.098	6.89709	0.996823	448.941	3.89435	0.562842	541.314
697	Pkinase	GATase	1210	151	0	0.666667	132.801	10.7337	0.999733	44.2669	3.57791	0.333244	540.264
698	Pkinase	SPOC	2933	245	0	0.627566	132.943	5.90345	0.999999	49.5124	2.19865	0.372434	538.668
699	RhoGEF	PHD	2812	201	0	0.471441	182.322	5.04718	0.997441	96.3678	2.66773	0.527207	536.214
700	IQ	RRM_1	12484	461	0	0.361533	446.957	1.82169	0.999685	285.367	1.16309	0.638266	536.185
701	Histone	Histone	1154	64	1	0.317647	308.311	12.2664	0.999746	210.377	8.37003	0.682179	535.682
702	Helicase_C	ResIII	1649	139	1	0.770492	373.141	16.7393	0.999975	85.639	3.84181	0.229502	534.011
703	Helicase_C	BEN	3841	158	0	0.59432	108.115	8.32659	1	43.86	3.37793	0.40568	533.712
704	FHA	HMG_box	1769	103	1	0.473913	119.937	9.78606	1	63.0972	5.14832	0.526087	530.277
705	14-3-3	WD40	9946	534	0	0.588556	93.522	2.41186	1	38.4791	0.992345	0.411444	529.912
706	Helicase_C	zf-UBR	3000	126	0	0.693396	481.018	13.7047	0.999975	147.482	4.2019	0.306596	529.44
707	Helicase_C	Prp19	6352	80	0	0.484346	315.71	12.8211	0.999406	162.797	6.61127	0.515347	528.901
708	WD40	Med4	586	59	0	0.546875	258.634	19.7785	0.999109	117.193	8.96212	0.452721	528.765
709	Pkinase	MIF4G	2327	221	1	0.553571	215.08	5.32217	1	96.0178	2.37597	0.446429	525.089
710	WD40	SART-1	1566	80	0	0.51682	281.588	13.5755	0.999993	136.058	6.55939	0.483177	524.752
711	Myb_DNA-binding	ELM2	2406	80	0	0.437011	255.728	11.6125	0.971857	143.972	6.53769	0.547145	523.015
712	RhoGAP	SAP	1772	91	0	0.421703	250.669	9.93765	0.998959	144.961	5.74691	0.577695	522.969
713	SNF2_N	CHDCT2	1648	57	0	0.496561	186.232	18.1883	1	93.7566	9.15671	0.503439	521.933
714	SNF2_N	CHDNT	1648	57	0	0.496561	186.232	18.1883	1	93.7566	9.15671	0.503439	521.933
715	SNF2_N	DUF1087	1648	57	0	0.496561	186.232	18.1883	1	93.7566	9.15671	0.503439	521.933
716	SNF2_N	DUF1086	1648	57	0	0.496561	186.232	18.1883	1	93.7566	9.15671	0.503439	521.933
717	Aldedh	RRM_1	1120	213	0	0.757576	146.741	10.0975	1	35.5736	2.44787	0.242424	521.396
718	WD40	Med12	408	43	0	0.490196	164.007	23.751	1	83.6112	12.1084	0.509804	520.66
719	KH_1	CH	5357	272	0	0.344017	922.927	2.91509	1	605.424	1.91225	0.655983	520.133
720	RRM_1	MIF4G	8805	411	1	0.501085	200.138	2.5275	0.999889	99.852	1.26101	0.49886	518.275
721	WD40	EFG_C	3200	110	0	0.485543	375.823	9.14825	0.998936	193.345	4.70638	0.513909	517.702
722	WD40	N1221	243	34	0	0.402985	233.598	25.486	0.919341	139.462	15.2155	0.54886	517.327
723	Cullin	TPR_1	543	67	1	0.340426	185.765	11.6869	0.999613	122.526	7.7084	0.659319	516.463
724	Bromodomain	Kinesin	3590	197	0	0.393571	420.234	4.31421	1	254.842	2.61626	0.606429	515.404
725	RRM_1	NTF2	4481	231	1	0.617486	198.82	5.8274	0.999964	76.0515	2.22906	0.3825	514.913
726	RRM_1	COBRA1	3302	95	0	0.598616	217.315	13.478	0.999938	87.2266	5.40984	0.401359	513.935
727	WD40	TIP49	9813	271	0	0.475538	331.236	3.60759	0.999572	173.721	1.89204	0.524237	512.743
728	Pkinase	ubiquitin	2593	343	1	0.660057	224.71	4.3833	1	76.3887	1.49007	0.339943	511.095
729	RRM_1	Sec63	10477	161	0	0.340659	412.631	4.81065	1	272.065	3.17185	0.659341	510.669
730	Pkinase	Ribosomal_L7Ae	2624	253	1	0.704678	53.8837	6.83371	1	15.913	2.01814	0.295322	510.59
731	FHA	Myb_DNA-binding	2279	98	0	0.459941	224.779	9.6119	1	121.394	5.191	0.540059	508.718
732	ubiquitin	TPR_1	887	114	0	0.673913	115.86	13.6812	0.999994	37.7804	4.46126	0.326085	508.583
733	WD40	EFG_IV	3193	108	0	0.485543	375.823	9.14825	0.998936	193.345	4.70638	0.513909	508.289
734	DEAD	RasGAP	9954	212	0	0.312375	678.489	3.48343	1	466.547	2.39529	0.687625	507.802
735	RRM_1	XPG_N	6564	208	0	0.507042	157.429	4.94616	1	77.606	2.43825	0.492958	507.155
736	RRM_1	XPG_I	6564	208	1	0.507042	157.429	4.94616	1	77.606	2.43825	0.492958	507.155
737	G-patch	zf-RanBP	1564	77	1	0.54375	188.412	14.4134	0.999975	85.9631	6.57611	0.456238	506.36
738	RRM_1	RNase_PH_C	14334	434	0	0.549425	112.041	2.58622	1	50.4829	1.16528	0.450575	505.734
739	ubiquitin	DEAD	8653	404	0	0.444444	267.595	2.24893	1	148.664	1.2494	0.555556	504.759
740	Myb_DNA-binding	GATA	3452	77	1	0.437011	450.123	11.6125	1	253.414	6.53769	0.562989	503.402
741	LRR_1	BRCT	1579	141	0	0.571429	206.447	8.29691	0.99926	88.4773	3.55582	0.428254	501.37
742	Helicase_C	DZF	10970	251	0	0.376171	254.762	3.19588	1	158.928	1.99368	0.623829	500.414
743	C2	PI3_PI4_kinase	134	26	1	0.5	452.122	38.3164	0.998792	226.061	19.1582	0.499396	498.113
744	Pkinase	ResIII	413	67	0	0.672727	98.9135	22.7089	0.999109	32.3717	7.43199	0.326981	497.943
745	DEAD	Histone	13838	493	0	0.466667	211.53	1.88999	1	112.816	1.00799	0.533333	496.941
746	LRR_1	Helicase_C	12050	961	0	0.571429	104.553	1.20658	1	44.8085	0.517105	0.428571	496.938
747	PHD	SPRY	2843	211	0	0.578947	218.012	5.59163	0.999987	91.7945	2.35437	0.421047	496.772
748	SAP	AAA	9575	280	0	0.400916	323.89	2.95968	0.998918	194.038	1.7731	0.598436	496.467
749	PHD	SWIB	956	76	0	0.504587	136.297	13.1469	1	67.5232	6.51314	0.495413	494.999
750	BAH	PI3_PI4_kinase	923	33	0	0.571587	678.031	34.9704	0.99756	290.477	14.9818	0.427368	494.398
751	WD40	zf-UBP	1410	99	0	0.461538	199.437	9.23109	0.999735	107.389	4.97059	0.538319	492.088
752	Helicase_C	QLQ	8162	133	0	0.381818	340.195	5.96114	0.999649	210.302	3.68507	0.617965	490.114
753	BTB	Kinesin	1268	135	0	0.634267	96.1957	9.83599	1	35.1819	3.59735	0.365733	485.642
754	RRM_1	PARP	15603	302	0	0.274713	857.767	2.21656	0.997582	622.128	1.60764	0.723534	485.508
755	BAH	Myb_DNA-binding	2795	74	1	0.435169	453.812	11.6125	0.926456	256.327	6.55908	0.523291	485.372
756	SAP	DUF618	2206	62	0	0.550904	367.432	17.3794	0.998366	165.012	7.80501	0.448362	483.911
757	Ank	FH2	920	99	0	0.505828	310.772	9.88836	1	153.575	4.88655	0.494172	483.769
758	SAP	zf-CCCH	1794	71	0	0.450223	193.119	12.3898	0.991054	106.173	6.81164	0.544859	483.627
759	AAA	RasGAP	5301	118	0	0.352827	745.386	6.33134	1	482.394	4.09748	0.647173	483.502
760	WW	IBN_N	1657	53	0	0.399293	358.307	15.1842	0.971238	215.238	9.12124	0.583429	483.426
761	HEAT	Cpn60_TCP1	730	24	0	0.560976	226.399	45.8034	0.970448	99.3948	20.1088	0.42605	482.612
762	Pkinase	CPSase_L_D2	1280	166	1	0.729412	132.801	10.7337	1	35.9343	2.90442	0.270588	482.133
763	Pkinase	CPSase_L_chain	1280	166	1	0.729412	132.801	10.7337	1	35.9343	2.90442	0.270588	482.133
764	DEAD	Rep_fac_C	23327	178	0	0.246663	927.244	3.56931	0.996106	698.527	2.68889	0.750403	478.623
765	PHD	TPR_1	2903	267	1	0.36	111.986	2.79414	0.999686	71.671	1.78825	0.639799	477.463
766	PHD	PAH	569	46	1	0.302326	245.794	14.8675	0.995806	171.484	10.3727	0.694748	477.143
767	Myb_DNA-binding	HA2	2061	63	1	0.449161	224.176	13.6964	0.979673	123.485	7.54452	0.539642	475.305
768	Myb_DNA-binding	DUF1605	2061	63	0	0.449161	224.176	13.6964	0.979673	123.485	7.54452	0.539642	475.305
769	WD40	UBA	2980	307	1	0.647059	224.71	4.3833	1	79.3095	1.54705	0.352941	474.944
770	PI3_PI4_kinase	Ku_N	684	15	0	0.483254	2604.69	61.2559	0.984554	1345.96	31.6538	0.508765	474.806
771	PI3_PI4_kinase	Ku_C	684	15	0	0.483254	2604.69	61.2559	0.984554	1345.96	31.6538	0.508765	474.806
772	PI3_PI4_kinase	Ku	684	15	0	0.483254	2604.69	61.2559	0.984554	1345.96	31.6538	0.508765	474.806
773	RRM_1	TPR_MLP1_2	8378	111	0	0.428768	3197.18	7.48133	0.986402	1826.33	4.27358	0.563464	474.367
774	PI3_PI4_kinase	Histone	1090	52	0	0.521368	400.794	19.045	0.9709	191.833	9.11557	0.464704	474.01
775	zf-UBP	RRM_1	4110	180	0	0.509091	144.153	5.34659	1	70.7658	2.62469	0.490909	472.444
776	Helicase_C	Topoisom_I	9273	145	0	0.302026	971.404	4.66075	0.996796	678.015	3.25309	0.695738	471.697
777	Helicase_C	Topoisom_I_N	9273	145	0	0.302026	971.404	4.66075	0.996796	678.015	3.25309	0.695738	471.697
778	Helicase_C	GATase	4113	213	0	0.683168	100.92	6.98586	0.999954	31.9747	2.21334	0.316817	471.442
779	DEAD	Linker_histone	11473	301	0	0.346237	190.987	2.39252	0.999827	124.86	1.56414	0.65365	470.807
780	Pkinase	Mov34	3083	317	1	0.605536	86.0831	3.76094	1	33.9567	1.48355	0.394464	470.286
781	Helicase_C	SPOC	14252	279	0	0.370124	628.704	2.67504	1	396.005	1.68494	0.629876	470.099
782	RRM_1	RasGAP	14399	404	0	0.361533	446.957	1.82169	1	285.367	1.16309	0.638467	469.889
783	ubiquitin	RRM_1	12934	789	0	0.664903	369.314	1.77303	1	123.756	0.594138	0.335097	468.775
784	FHA	Bromodomain	1975	112	0	0.473913	227.153	7.91901	1	119.502	4.16609	0.526087	466.602
785	WD40	LIM	5574	524	0	0.538462	119.061	1.92412	1	54.9511	0.888056	0.461538	465.341
786	Helicase_C	1-cysPrx_C	16578	311	0	0.451791	382.293	2.70281	1	209.576	1.48171	0.548209	460.811
787	Helicase_C	AhpC-TSA	16578	311	0	0.451791	382.293	2.70281	1	209.576	1.48171	0.548209	460.811
788	Adaptin_N	SMC_hinge	917	51	0	0.700637	585.82	30.1327	0.984937	175.373	9.02062	0.294854	460.052
789	SPRY	BRCT	1871	106	0	0.566529	189.441	9.97683	0.99991	82.1171	4.32466	0.433431	458.414
790	SH3_2	Helicase_C	5855	626	0	0.804878	120.734	3.75193	1	23.5579	0.732084	0.195122	458.285
791	Pkinase	SH3_1	919	211	1	0.714286	92.9871	7.58942	1	26.5678	2.1684	0.285714	457.533
792	Helicase_C	zf-C3HC4	10145	726	1	0.57238	261.267	1.47272	1	111.723	0.629764	0.42762	457.209
793	CHDCT2	ELM2	803	24	0	0.492063	1499.61	37.4352	0.988811	761.704	19.0147	0.502253	456.353
794	CHDNT	ELM2	803	24	0	0.492063	1499.61	37.4352	0.988811	761.704	19.0147	0.502253	456.353
795	DUF1087	ELM2	803	24	0	0.492063	1499.61	37.4352	0.988811	761.704	19.0147	0.502253	456.353
796	DUF1086	ELM2	803	24	0	0.492063	1499.61	37.4352	0.988811	761.704	19.0147	0.502253	456.353
797	Biotin_lipoyl	2-oxoacid_dh	964	29	1	0.320236	3188.68	23.1488	0.992204	2167.55	15.7357	0.674465	456.336
798	zf-C2H2	2-Hacid_dh_C	305	32	1	0.333333	208.852	21.3904	0.989346	139.235	14.2603	0.659564	456.328
799	zf-C2H2	2-Hacid_dh	305	32	1	0.333333	208.852	21.3904	0.989346	139.235	14.2603	0.659564	456.328
800	PDZ	Helicase_C	9367	923	0	0.7	120.734	1.64745	1	36.2202	0.494236	0.3	456.18
801	HEAT	Bromodomain	3373	171	0	0.466667	190.965	4.99375	1	101.848	2.66333	0.533333	455.43
802	DEAD	NAP	3787	161	0	0.594533	145.26	6.97125	1	58.8982	2.82661	0.405467	455.085
803	PHD	HSA	2579	95	0	0.395789	163.478	7.91897	1	98.7748	4.78473	0.604211	454.549
804	Ank	Drf_FH3	893	93	0	0.505828	310.772	9.88836	1	153.575	4.88655	0.494172	454.45
805	Ank	Drf_GBD	893	93	0	0.505828	310.772	9.88836	1	153.575	4.88655	0.494172	454.45
806	WD40	Thioredoxin	3454	316	0	0.741935	46.1695	5.56236	1	11.9147	1.43545	0.258065	453.602
807	HEAT	PH	2763	239	0	0.364279	533.102	2.9748	1	338.904	1.89114	0.635721	451.983
808	HEAT	Ank	2623	268	0	0.546547	175.745	3.71593	1	79.692	1.685	0.453453	451.58
809	Pkinase	MA3	2164	190	0	0.553571	215.08	5.32217	1	96.0178	2.37597	0.446429	451.434
810	Biotin_carb_C	RRM_1	1917	191	0	0.784946	366.89	10.9841	1	78.9012	2.36218	0.215054	451.175
811	Helicase_C	Daxx	210	32	0	0.478261	269.003	26.9819	0.993986	140.349	14.0775	0.518602	450.48
812	Helicase_C	GUCT	11067	149	0	0.402927	975.517	5.06294	0.989743	582.455	3.02294	0.590949	450.419
813	SH3_1	Kinesin	947	155	0	0.76	125.099	12.0711	1	30.0237	2.89707	0.24	449.045
814	DEAD	SMC_hinge	14555	237	0	0.388535	380.218	3.09495	1	232.49	1.89245	0.611465	448.512
815	Helicase_C	Amino_oxidase	4110	72	0	0.62069	986.66	16.3333	0.989791	374.25	6.1954	0.375438	446.068
816	DEAD	PARP	10501	151	0	0.256595	1860.39	3.96946	1	1383.02	2.95092	0.743405	445.589
817	WD40	DUF1115	990	63	0	0.550388	245.28	15.7013	1	110.281	7.05949	0.449612	444.748
818	WD40	PRP3	990	63	0	0.550388	245.28	15.7013	1	110.281	7.05949	0.449612	444.748
819	Helicase_C	PRP3	2096	61	0	0.462585	312.062	13.5621	0.969735	167.707	7.28847	0.52115	444.597
820	Helicase_C	DUF1115	2096	61	0	0.462585	312.062	13.5621	0.969735	167.707	7.28847	0.52115	444.597
821	RRM_1	MA3	7733	352	0	0.501085	200.138	2.5275	1	99.852	1.26101	0.498915	443.875
822	Pkinase	RasGAP	3582	259	1	0.584906	214.793	4.09536	0.996849	89.1595	1.69996	0.413786	440.29
823	TPR_1	Leo1	53	9	0	0.333333	830.242	73.1234	0.995579	553.494	48.749	0.663719	438.741
824	Helicase_C	FH2	9594	348	1	0.559033	151.224	2.85343	1	66.6847	1.25827	0.440967	437.877
825	FKBP_C	RRM_1	4954	245	1	0.751049	213.426	7.17323	1	53.1326	1.78578	0.248951	437.517
826	Bromodomain	Histone	2460	157	1	0.602694	82.0185	6.98943	1	32.5865	2.77694	0.397306	435.98
827	PHD	HDAC_interact	551	42	0	0.302326	245.794	14.8675	0.995806	171.484	10.3727	0.694748	435.652
828	SNF2_N	MBD	738	56	0	0.632768	239.257	21.1164	0.996271	87.8629	7.75461	0.365862	434.258
829	RRM_1	DUF1115	2792	91	0	0.590909	64.8037	11.6418	1	26.5106	4.76257	0.409091	433.394
830	RRM_1	PRP3	2792	91	0	0.590909	64.8037	11.6418	1	26.5106	4.76257	0.409091	433.394
831	Ank	Kinesin	2520	261	0	0.6	209.813	4.14568	1	83.9251	1.65827	0.4	432.809
832	RRM_1	HSA	12790	306	0	0.391144	292.013	2.31228	0.999902	177.794	1.40785	0.608797	430.801
833	RRM_1	SART-1	4335	104	0	0.498652	127.89	8.25189	0.999949	64.1173	4.13707	0.501322	430.255
834	Myb_DNA-binding	LisH	728	43	0	0.652661	1086.19	28.7807	0.949645	377.277	9.99667	0.329849	429.857
835	Helicase_C	GYF	3223	134	0	0.6	106.529	8.00247	0.998624	42.6114	3.20099	0.39945	428.933
836	AAA	Histone	7162	305	1	0.5	173.792	2.80903	1	86.8961	1.40452	0.5	428.378
837	WD40	Vps4_C	941	90	0	0.790087	710.487	22.6527	0.999909	149.14	4.75509	0.209893	427.958
838	RRM_1	GTF2I	15056	189	0	0.26149	1060.86	3.06605	0.98669	783.455	2.26431	0.728681	427.955
839	WD40	ORC3_N	96	16	0	0.705882	415.829	90.8304	0.999879	122.303	26.7148	0.294082	427.437
840	PHD	MBD	645	55	1	0.632768	239.257	21.1164	0.999192	87.8629	7.75461	0.366935	426.504
841	HMG_box	S1	990	52	0	0.582468	110.89	19.617	0.999505	46.3002	8.19072	0.417325	425.917
842	Actin	Bromodomain	1521	100	1	0.66747	176.381	12.7882	1	58.6519	4.25247	0.33253	425.247
843	zf-C2H2	RRM_1	11525	1123	1	0.522565	109.636	0.79265	1	52.3442	0.378439	0.477435	424.986
844	Biotin_lipoyl	Biotin_lipoyl	981	27	1	0.320236	3188.68	23.1488	0.998531	2167.55	15.7357	0.678766	424.865
845	RRM_1	NAP	6277	317	1	0.553719	87.5404	2.98821	0.998404	39.0676	1.33358	0.445569	422.746
846	RRM_1	NOP5NT	11717	203	0	0.430642	232.056	3.65417	0.985335	132.123	2.08053	0.561008	422.348
847	Helicase_C	zf-PARP	12817	143	0	0.256595	1860.39	3.96946	0.997609	1383.02	2.95092	0.741628	421.981
848	PH	MIF4G	780	74	0	0.465116	179.935	10.6499	0.999109	96.2441	5.69646	0.534407	421.538
849	HEAT	DUF618	2568	80	0	0.438944	213.695	9.31143	0.999947	119.895	5.22424	0.561026	417.939
850	Pkinase	Mob1_phocein	917	85	1	0.6	45.881	12.2839	0.999631	18.3524	4.91355	0.399852	417.652
851	SH3_1	WH2	55	12	1	0.263158	383.244	47.2123	0.988192	282.39	34.788	0.728142	417.456
852	W2	RRM_1	7428	331	1	0.501085	200.138	2.5275	1	99.852	1.26101	0.498915	417.394
853	SH2	Helicase_C	7220	578	0	0.666667	85.3533	2.16601	1	28.4511	0.722003	0.333333	417.318
854	WD40	GRIP	837	122	0	0.836735	343.4	20.9288	1	56.0652	3.41695	0.163265	416.868
855	BAH	ELM2	1346	53	1	0.516888	314.901	16.237	0.999311	152.132	7.84426	0.482779	415.746
856	ubiquitin	U-box	473	21	0	0.52381	155.666	41.5641	0.994413	74.1266	19.7924	0.47353	415.641
857	BAH	DEAD	14399	299	0	0.415507	297.397	2.3762	1	173.827	1.38887	0.584493	415.272
858	FHA	ARID	592	49	0	0.463415	89.3914	15.7939	1	47.9661	8.47478	0.536585	415.264
859	zf-C3HC4	Kinesin	1590	135	0	0.633921	95.8633	8.38123	0.999999	35.0935	3.06819	0.366078	414.206
860	Kinesin	DNA_gyraseB	3593	67	0	0.385908	1990.74	10.0476	0.950748	1222.5	6.17013	0.583847	413.399
861	Kinesin	DTHCT	3593	67	0	0.385908	1990.74	10.0476	0.950748	1222.5	6.17013	0.583847	413.399
862	Kinesin	DNA_topoisoIV	3593	67	0	0.385908	1990.74	10.0476	0.950748	1222.5	6.17013	0.583847	413.399
863	SNF2_N	PI3_PI4_kinase	2379	89	0	0.503597	298.44	9.35132	1	148.147	4.64202	0.496403	413.14
864	Pkinase	WW	3709	299	1	0.662624	214.793	4.09536	1	72.4661	1.38168	0.337376	413.121
865	Ank	Bromodomain	1912	224	0	0.703937	181.074	6.22803	0.999724	53.6092	1.84389	0.295981	413.031
866	WD40	zf-C2H2	3666	402	1	0.545775	59.2008	2.25364	1	26.8905	1.02366	0.454225	411.511
867	RRM_1	DZF	15058	349	0	0.415959	176.001	2.0156	1	102.792	1.17719	0.584041	410.84
868	DEAD	SMC_N	14149	221	0	0.388535	380.218	3.03974	1	232.49	1.8587	0.611465	410.772
869	Biotin_lipoyl	Helicase_C	10442	362	0	0.668508	663.54	3.40826	0.999852	219.958	1.12981	0.331443	408.991
870	PH	PHD	3231	312	0	0.471441	182.322	2.47946	1	96.3678	1.31054	0.528559	408.889
871	Pkinase	W2	2002	172	0	0.553571	215.08	5.32217	1	96.0178	2.37597	0.446429	408.666
872	LIM	DEAD	10242	519	0	0.522624	201.452	1.64745	1	96.1682	0.786454	0.477376	408.17
873	RRM_1	Proteasome_A_N	5465	485	0	0.727273	38.66	3.0832	1	10.5436	0.840873	0.272727	407.824
874	WD40	PRP1_N	1866	89	0	0.528205	261.593	9.69332	0.997309	123.418	4.57326	0.470525	407.02
875	DEAD	PRP1_N	3308	49	0	0.399061	458.176	13.8119	0.976094	275.336	8.30009	0.586573	406.704
876	WD40	RanBPM_CRA	260	49	0	0.225806	84.5306	10.6755	0.999841	65.443	8.26489	0.774071	404.98
877	Ank	SET	332	53	1	0.44186	152.273	13.6534	1	84.9895	7.62049	0.55814	403.886
878	RRM_1	RRM_4	8061	110	0	0.396752	329.976	6.06636	1	199.058	3.65952	0.603248	402.547
879	RRM_1	U6-snRNA_bdg	8061	110	0	0.396752	329.976	6.06636	1	199.058	3.65952	0.603248	402.547
880	RRM_1	PRO8NT	8061	110	0	0.396752	329.976	6.06636	1	199.058	3.65952	0.603248	402.547
881	RRM_1	PROCN	8061	110	0	0.396752	329.976	6.06636	1	199.058	3.65952	0.603248	402.547
882	RRM_1	PROCT	8061	110	0	0.396752	329.976	6.06636	1	199.058	3.65952	0.603248	402.547
883	RRM_1	U5_2-snRNA_bdg	8061	110	0	0.396752	329.976	6.06636	1	199.058	3.65952	0.603248	402.547
884	HEAT	DEP	99	20	0	0.560976	226.399	45.8034	1	99.3948	20.1088	0.439024	402.177
885	RhoGEF	RhoGEF	427	53	1	0.52381	168.334	15.8984	0.985209	80.1592	7.57069	0.469147	401.246
886	FAT	Histone	1048	44	0	0.521368	400.794	19.045	0.9709	191.833	9.11557	0.464704	401.085
887	WD40	Prp19	2680	109	0	0.556021	174.398	8.27311	1	77.4292	3.67309	0.443979	400.367
888	RhoGEF	AAA	5899	325	1	0.431487	516.651	2.16653	1	293.723	1.2317	0.568513	400.303
889	UCH	UCH	93	17	1	0.411765	361.797	40.0085	0.999113	212.822	23.5344	0.587714	400.085
890	PHD	SET	1217	126	1	0.538462	221.663	6.87572	1	102.306	3.17341	0.461538	399.849
891	BAH	CHDCT2	825	21	0	0.492063	1499.61	37.4352	0.982766	761.704	19.0147	0.499183	399.309
892	BAH	CHDNT	825	21	0	0.492063	1499.61	37.4352	0.982766	761.704	19.0147	0.499183	399.309
893	BAH	DUF1086	825	21	0	0.492063	1499.61	37.4352	0.982766	761.704	19.0147	0.499183	399.309
894	BAH	DUF1087	825	21	0	0.492063	1499.61	37.4352	0.982766	761.704	19.0147	0.499183	399.309
895	WD40	JmjC	2431	227	0	0.544256	67.4586	3.85571	1	30.7438	1.75722	0.455744	398.888
896	SNF2_N	BRK	2841	94	0	0.468263	161.668	7.96642	0.981691	85.9647	4.23604	0.522001	398.187
897	Pkinase	DEAD_2	109	27	0	0.55102	152.171	32.771	0.975669	68.3216	14.7135	0.438055	397.264
898	HEAT	HEAT	2518	98	1	0.449677	206.116	7.36464	0.997096	113.43	4.05293	0.548725	397.188
899	DEAD	SART-1	2614	50	0	0.421488	304.327	13.7076	0.999834	176.057	7.93002	0.578416	396.501
900	DEAD	PWWP	8110	242	0	0.352423	561.09	2.51802	0.999219	363.349	1.63061	0.647071	394.608
901	ARID	BRK	603	36	0	0.522963	934.17	22.8399	0.969562	445.634	10.8955	0.462517	392.237
902	RRM_1	TIP49	26025	248	0	0.288423	788.09	2.22214	1	560.787	1.58122	0.711577	392.143
903	C2	Helicase_C	3259	558	0	0.636364	63.7083	1.93256	1	23.1666	0.702751	0.363636	392.135
904	DUF1086	GATA	1104	20	0	0.477537	1499.61	37.4352	0.917663	783.488	19.5585	0.479444	391.17
905	CHDCT2	GATA	1104	20	0	0.477537	1499.61	37.4352	0.917663	783.488	19.5585	0.479444	391.17
906	CHDNT	GATA	1104	20	0	0.477537	1499.61	37.4352	0.917663	783.488	19.5585	0.479444	391.17
907	DUF1087	GATA	1104	20	0	0.477537	1499.61	37.4352	0.917663	783.488	19.5585	0.479444	391.17
908	14-3-3	AAA	9715	199	0	0.500404	201.322	3.93263	1	100.579	1.96473	0.499596	390.98
909	Aldo_ket_red	RRM_1	903	191	0	0.714286	22.4821	7.15535	0.999823	6.42347	2.04439	0.285664	390.478
910	DEAD	Surp	5302	158	0	0.546667	518.79	5.44939	1	235.185	2.47039	0.453333	390.321
911	WD40	CDC48_2	905	82	0	0.790087	710.487	22.6527	0.999909	149.14	4.75509	0.209893	389.917
912	WD40	CDC48_N	905	82	1	0.790087	710.487	22.6527	0.999909	149.14	4.75509	0.209893	389.917
913	WD40	Leo1	182	27	0	0.508772	447.186	29.371	0.991897	219.67	14.4278	0.487248	389.552
914	BAH	FAT	873	26	0	0.571587	678.031	34.9704	0.995062	290.477	14.9818	0.426297	389.526
915	PHD	Amino_oxidase	995	35	0	0.613659	986.66	28.7372	0.981433	381.188	11.1024	0.379168	388.583
916	Adaptin_N	SMC_N	873	43	0	0.700637	585.82	30.1327	0.984937	175.373	9.02062	0.294854	387.887
917	PH	Histone	1537	177	0	0.667034	56.1593	6.57429	1	18.6991	2.18901	0.332966	387.456
918	Helicase_C	PFK	6825	184	1	0.520276	192.327	4.37797	0.997172	92.2637	2.10021	0.478367	386.44
919	AAA	WW	6421	183	0	0.352827	745.386	3.25404	1	482.394	2.10593	0.647173	385.385
920	HATPase_c	Septin	3298	51	1	0.439808	1006.62	13.4771	0.999059	563.902	7.54977	0.559664	385.038
921	PI3_PI4_kinase	Kinesin	1524	84	0	0.547729	155.253	10.1243	1	70.2163	4.57894	0.452271	384.631
922	ARID	DEAD	5069	312	0	0.520179	72.0377	2.56702	0.998613	34.5652	1.23171	0.479155	384.293
923	AAA	zf-RanBP	7860	203	0	0.471924	212.901	3.57856	0.998929	112.428	1.88976	0.527511	383.62
924	SAP	SMC_hinge	2305	54	0	0.486137	410.168	13.8231	0.971304	210.77	7.10317	0.499117	383.571
925	SH2	Mov34	559	61	0	0.666667	111.874	18.8379	0.989602	37.2914	6.2793	0.329867	383.037
926	SET	RRM_1	6119	558	1	0.793651	45.2561	3.32563	1	9.33857	0.686241	0.206349	382.922
927	Myb_DNA-binding	QLQ	1350	26	0	0.351159	1574.64	22.6545	0.926565	1021.69	14.6992	0.601194	382.179
928	HMG_box	Kinesin	3164	186	0	0.52381	178.22	4.31421	1	84.8667	2.05439	0.47619	382.116
929	PH	MA3	728	67	0	0.465116	179.935	10.6499	0.999797	96.2441	5.69646	0.534775	381.663
930	WD40	dsrm	5429	305	0	0.48886	140.366	2.44767	1	71.7468	1.2511	0.51114	381.586
931	RRM_1	Ku	13865	216	0	0.391248	351.963	2.90184	1	214.258	1.7665	0.608752	381.564
932	RRM_1	Ku_C	13865	216	0	0.391248	351.963	2.90184	1	214.258	1.7665	0.608752	381.564
933	RRM_1	Ku_N	13865	216	0	0.391248	351.963	2.90184	1	214.258	1.7665	0.608752	381.564
934	Pkinase	cwf21	1621	147	0	0.677749	75.2532	8.03224	1	24.2504	2.58839	0.322251	380.494
935	Ank	Death	119	30	1	0.59375	790.807	31.1774	1	321.265	12.6658	0.40625	379.975
936	C2	RRM_1	3663	692	0	0.625	23.0153	1.46227	1	8.63075	0.548352	0.375	379.459
937	WD40	ABC_tran	1491	170	1	0.738272	190.713	8.52643	1	49.9151	2.23161	0.261728	379.373
938	Helicase_C	Ras	11939	798	1	0.683891	85.3751	1.50147	1	26.9879	0.474627	0.316109	378.752
939	Ank	SNF2_N	3513	358	0	0.636842	69.1882	2.91299	1	25.1262	1.05787	0.363158	378.719
940	RRM_1	Topoisom_I	11354	203	0	0.36908	813.145	2.95126	0.999054	513.03	1.86201	0.630324	377.989
941	RRM_1	Topoisom_I_N	11354	203	0	0.36908	813.145	2.95126	0.999054	513.03	1.86201	0.630324	377.989
942	Ank	2-Hacid_dh	565	55	0	0.73545	257.878	25.8717	0.998443	68.2218	6.84435	0.264138	376.439
943	Ank	2-Hacid_dh_C	565	55	0	0.73545	257.878	25.8717	0.998443	68.2218	6.84435	0.264138	376.439
944	UBA	U-box	313	19	0	0.52381	155.666	41.5641	1	74.1266	19.7924	0.47619	376.056
945	FHA	Metallophos	884	53	1	0.689482	631.679	22.7117	0.999957	196.147	7.05239	0.310504	373.777
946	zf-CCCH	SPOC	1157	34	0	0.35369	667.971	16.9699	0.957491	431.717	10.9678	0.618836	372.906
947	AAA	HATPase_c	10906	160	0	0.296069	1207.11	3.30362	0.999449	849.725	2.32552	0.703544	372.084
948	Pkinase	MGS	996	128	0	0.729412	132.801	10.7337	0.999733	35.9343	2.90442	0.270516	371.765
949	AAA	PC_rep	942	44	1	0.588235	255.14	20.5047	0.995532	105.058	8.4431	0.409925	371.496
950	DEAD	zf-UBR	2280	88	0	0.693396	481.018	13.7047	0.999975	147.482	4.2019	0.306596	369.767
951	Helicase_C	zf-C4_Topoisom	426	35	0	0.769231	764.462	45.6517	0.958111	176.414	10.535	0.221103	368.725
952	WD40	DTHCT	10060	278	0	0.453091	700.399	2.42453	1	383.055	1.326	0.546909	368.627
953	WD40	DNA_gyraseB	10060	278	0	0.453091	700.399	2.42453	1	383.055	1.326	0.546909	368.627
954	WD40	DNA_topoisoIV	10060	278	0	0.453091	700.399	2.42453	1	383.055	1.326	0.546909	368.627
955	Pkinase	Cullin	1505	228	1	0.707692	26.4581	5.51473	1	7.7339	1.612	0.292308	367.536
956	WD40	CS	2118	188	0	0.25	64.5944	2.60481	0.998927	48.4458	1.95361	0.749195	367.278
957	LRR_1	DEAD	9302	710	0	0.571429	104.553	1.20658	1	44.8085	0.517105	0.428571	367.144
958	WD40	Rep_fac_C	12511	385	0	0.488744	249.128	1.86484	1	127.368	0.95341	0.511256	367.063
959	WD40	TFIID-31kDa	754	70	1	0.716216	79.9938	18.4474	1	22.701	5.23508	0.283784	366.456
960	Pkinase	DUF1241	810	79	0	0.75122	280.133	18.6392	0.995798	69.6916	4.63708	0.247735	366.329
961	PHD	PI3_PI4_kinase	2126	101	0	0.482916	255.166	7.00875	0.999347	131.942	3.62411	0.516747	366.035
962	efhand	Kinesin	743	77	0	0.786982	167.228	22.2937	0.996616	35.6225	4.74895	0.212297	365.669
963	Ank	LRR_1	878	139	1	0.665529	65.9421	7.85451	0.99973	22.0557	2.62711	0.334381	365.168
964	BEN	DEAD	2875	108	0	0.59432	108.115	8.32659	1	43.86	3.37793	0.40568	364.816
965	RRM_1	Thioredoxin	9790	483	1	0.714286	70.2301	2.6387	1	20.0657	0.753915	0.285714	364.141
966	Helicase_C	RasGAP_C	9640	152	0	0.312375	678.489	3.48343	1	466.547	2.39529	0.687625	364.084
967	Pkinase	GIT_SHD	293	49	0	0.433962	257.999	13.122	0.996362	146.037	7.42753	0.563978	363.949
968	GATA	GATA	1408	23	1	0.343343	846.344	24.0535	0.968524	555.758	15.7949	0.635988	363.282
969	PI3_PI4_kinase	DEAD	7641	214	0	0.469681	507.672	3.19856	0.989818	269.228	1.69625	0.524919	362.998
970	Helicase_C	Tfb2	1187	51	0	0.648536	167.214	20.1928	0.988975	58.7698	7.09707	0.34759	361.95
971	Helicase_C	Proteasome	9093	618	1	0.696629	38.4323	1.93019	1	11.6593	0.585563	0.303371	361.878
972	Kinesin	zf-B_box	3092	137	0	0.363636	420.234	4.14757	0.995928	267.422	2.63936	0.633773	361.592
973	Pkinase	Suf	502	73	0	0.754098	110.165	20.0574	0.99999	27.0898	4.93214	0.245899	360.046
974	WD40	RasGAP	5056	268	0	0.577488	155.717	3.17572	1	65.7922	1.34178	0.422512	359.597
975	WD40	S1	3654	234	1	0.544928	101.387	3.37511	0.999656	46.1385	1.53592	0.454916	359.406
976	WD40	Med13_C	189	33	0	0.4	192.553	18.1237	0.999229	115.532	10.8742	0.599537	358.849
977	HMG_box	Histone	2179	138	1	0.565217	79.2854	5.96236	0.999862	34.4719	2.59233	0.434723	357.742
978	DEAD	Prp19	5015	54	0	0.484346	315.71	12.8211	0.999406	162.797	6.61127	0.515347	357.009
979	SAP	FHA	1953	95	0	0.551882	178.383	8.38123	0.999999	79.9366	3.75578	0.448117	356.799
980	C2	PH	230	47	1	0.52381	168.334	15.8984	0.999208	80.1592	7.57069	0.475813	355.822
981	HEAT	VWA	286	28	0	0.624242	579.825	33.7533	0.994709	217.874	12.6831	0.373769	355.126
982	SAP	HMG_box	2870	133	0	0.505798	149.203	5.39873	0.997171	73.7366	2.66806	0.492804	354.852
983	Arm	CH	1113	87	0	0.548583	98.6011	9.02751	1	44.5102	4.07517	0.451417	354.54
984	Pkinase	PDZ	1875	281	1	0.5	61.6152	2.52248	1	30.8076	1.26124	0.5	354.409
985	WD40	GYF	1195	106	0	0.616822	135.227	8.71924	0.997176	51.8158	3.34102	0.382096	354.148
986	ArfGap	Helicase_C	7210	426	0	0.655696	72.7044	2.41282	1	25.0324	0.830743	0.344304	353.896
987	Myb_DNA-binding	U-box	955	27	0	0.467412	1216.82	24.5698	1	648.066	13.0856	0.532588	353.311
988	RRM_1	PABP	10397	395	1	0.606805	95.5039	2.27188	0.998625	37.5516	0.893292	0.392654	352.85
989	PDZ	DEAD	7452	713	0	0.7	120.734	1.64745	1	36.2202	0.494236	0.3	352.39
990	Pkinase	Striatin	243	52	0	0.745455	195.961	26.5491	1	49.8809	6.75795	0.254545	351.414
991	Myb_DNA-binding	Hist_deacetyl	2154	39	0	0.387191	695.061	14.6625	0.860421	425.94	8.98532	0.527274	350.428
992	DEAD	ResIII	1231	97	0	0.784314	373.141	16.7393	0.999975	80.4815	3.61044	0.215681	350.212
993	WD40	RNase_PH	7622	427	0	0.547059	119.005	1.80261	1	53.9022	0.816477	0.452941	348.635
994	GATA	Hist_deacetyl	1975	28	0	0.364898	902.152	19.6022	0.991241	572.959	12.4494	0.629539	348.583
995	SAP	SMC_N	2242	49	0	0.486137	410.168	13.8231	0.951832	210.77	7.10317	0.489112	348.055
996	RRM_1	AhpC-TSA	20093	450	0	0.455799	291.167	1.41873	1	158.453	0.772072	0.544201	347.432
997	RRM_1	1-cysPrx_C	20093	450	0	0.455799	291.167	1.41873	1	158.453	0.772072	0.544201	347.432
998	BRCT	Kinesin	4481	151	0	0.304615	687.297	3.30673	1	477.936	2.29945	0.695385	347.217
999	Biotin_lipoyl	E3_binding	923	22	0	0.320236	3188.68	23.1488	0.984414	2167.55	15.7357	0.669169	346.186
1000	UBA	RRM_1	8294	600	1	0.674877	369.314	1.77303	1	120.073	0.576454	0.325123	345.872
1001	PH	KH_1	3749	313	0	0.472273	478.794	2.09292	1	252.672	1.10449	0.527727	345.705
1002	WD40	Tau95	2023	95	0	0.548989	226.411	8.02222	0.999815	102.114	3.61811	0.450927	343.72
1003	SNF2_N	FAT	2291	74	1	0.503597	298.44	9.35132	1	148.147	4.64202	0.496403	343.51
1004	Helicase_C	cwf21	6881	139	0	0.546667	518.79	5.44939	0.998459	235.185	2.47039	0.452635	343.384
1005	DEAD	DZF	8556	172	0	0.376171	254.762	3.19588	0.999661	158.928	1.99368	0.623617	342.913
1006	Carboxyl_trans	RRM_1	1559	145	0	0.784946	366.89	10.9841	1	78.9012	2.36218	0.215054	342.515
1007	RRM_1	Guanylate_kin	2818	203	0	0.777778	214.369	7.56412	1	47.6375	1.68091	0.222222	341.226
1008	HMG_box	BRK	1574	64	0	0.459916	550.771	9.87076	0.999842	297.463	5.33104	0.539999	341.187
1009	WD40	eIF3_N	222	33	0	0.540541	115.117	22.4445	0.998869	52.8914	10.3124	0.45894	340.308
1010	LRR_1	PID	514	68	0	0.582734	144.65	11.9821	1	60.3576	4.99974	0.417266	339.982
1011	DEAD	zf-C3HC4	8057	539	0	0.57238	261.267	1.47272	1	111.723	0.629764	0.42762	339.443
1012	Helicase_C	PRP4	2340	64	0	0.530547	268.477	11.2889	0.948861	126.038	5.29959	0.445446	339.174
1013	RRM_1	tRNA_anti	10782	361	1	0.573529	136.868	2.19985	1	58.3702	0.938173	0.426471	338.68
1014	RRM_1	zf-PARP	14897	210	0	0.274713	857.767	2.21656	0.99771	622.128	1.60764	0.723626	337.605
1015	Ank	Drf_DAD	734	69	0	0.505828	310.772	9.88836	1	153.575	4.88655	0.494172	337.172
1016	BAH	Hist_deacetyl	1498	27	0	0.364898	781.945	19.6022	0.941091	496.615	12.4494	0.597689	336.134
1017	ELM2	Hist_deacetyl	1502	27	0	0.364898	781.945	19.6022	0.967315	496.615	12.4494	0.614344	336.134
1018	14-3-3	PH	2228	200	0	0.527072	95.0932	3.54011	1	44.9723	1.67422	0.472928	334.844
1019	Helicase_C	zf-C3H1	1476	60	0	0.68018	608.633	17.391	0.991241	194.653	5.56198	0.317018	333.719
1020	CH	CH	1270	127	1	0.634146	89.2189	7.17194	1	32.6411	2.62388	0.365854	333.233
1021	Gelsolin	Sec23_BS	69	28	1	0.5	284.451	23.6899	0.960419	142.226	11.8449	0.48021	331.658
1022	Gelsolin	Sec23_trunk	69	28	1	0.5	284.451	23.6899	0.960419	142.226	11.8449	0.48021	331.658
1023	Gelsolin	Sec23_helical	69	28	1	0.5	284.451	23.6899	0.960419	142.226	11.8449	0.48021	331.658
1024	Gelsolin	zf-Sec23_Sec24	69	28	1	0.5	284.451	23.6899	0.960419	142.226	11.8449	0.48021	331.658
1025	Pkinase	S1	1918	178	1	0.636364	47.5639	5.11885	1	17.296	1.8614	0.363636	331.329
1026	Pkinase	CPSase_L_D3	944	114	0	0.729412	132.801	10.7337	0.999733	35.9343	2.90442	0.270516	331.104
1027	Pkinase	CPSase_sm_chain	944	114	0	0.729412	132.801	10.7337	0.999733	35.9343	2.90442	0.270516	331.104
1028	WD40	Med17	291	32	0	0.447619	334.985	18.6861	0.976639	185.039	10.3218	0.539477	330.299
1029	Helicase_C	BSD	663	45	0	0.636364	101.022	20.1203	0.982109	36.7352	7.31646	0.357131	329.241
1030	RRM_1	Skp1_POZ	6161	173	0	0.590769	123.786	4.64361	0.999859	50.6571	1.90031	0.409173	328.753
1031	RFX_DNA_binding	Bromodomain	1063	56	1	0.522963	159.52	12.2997	1	76.0971	5.8674	0.477037	328.574
1032	CH	Kinesin	3734	238	1	0.39485	305.041	2.27595	0.998935	184.596	1.37729	0.604506	327.795
1033	Helicase_C	PAH	2138	110	0	0.72752	245.794	10.9284	1	66.9737	2.97776	0.27248	327.554
1034	Ank	PDZ	766	125	1	0.666667	65.9421	7.85451	0.999827	21.9807	2.61817	0.333276	327.271
1035	AAA	PWWP	4283	140	0	0.430246	398.002	4.09796	1	226.763	2.33483	0.569754	326.876
1036	ARID	HSA	548	30	0	0.522963	934.17	22.8399	1	445.634	10.8955	0.477037	326.864
1037	SPRY	zf-CCCH	989	64	0	0.587799	163.503	12.3898	1	67.396	5.1071	0.412201	326.854
1038	Chromo	Chromo	694	44	1	0.591603	186.232	18.1883	0.981981	76.0567	7.42806	0.401038	326.835
1039	Biotin_lipoyl	Transket_pyr	1032	25	1	0.430025	1488.59	22.9362	0.914568	848.457	13.0731	0.521281	326.827
1040	zf-C2H2	GATA	1354	141	1	0.546028	73.5454	5.0991	1	33.3876	2.31485	0.453972	326.394
1041	CH	Mov34	1500	113	0	0.518987	183.365	5.9966	1	88.2008	2.88444	0.481013	325.942
1042	Pkinase	Histone	3766	455	1	0.583333	47.6123	1.71729	1	19.8384	0.715539	0.416667	325.57
1043	SH3_1	DEAD	5233	746	1	0.777778	68.198	1.96359	1	15.1551	0.436353	0.222222	325.52
1044	DEAD	SPOC	10957	193	0	0.370124	628.704	2.67504	0.99991	396.005	1.68494	0.62982	325.194
1045	FHA	AAA	6195	249	1	0.401691	273.302	2.18233	1	163.519	1.30571	0.598309	325.121
1046	PH	W2	670	57	0	0.465116	179.935	10.6499	0.999109	96.2441	5.69646	0.534407	324.698
1047	Helicase_C	MIF4G	7998	301	1	0.477352	252.965	2.05733	1	132.212	1.07526	0.522648	323.653
1048	Myb_DNA-binding	Kinesin	4271	176	0	0.382995	340.431	2.97377	0.997788	210.047	1.83483	0.615641	322.93
1049	PHD	FAT	2053	89	0	0.482916	255.166	7.00875	0.999347	131.942	3.62411	0.516747	322.546
1050	Pkinase	TPX2	739	70	0	0.649289	395.921	13.135	0.994084	138.854	4.60658	0.348636	322.46
1051	Pkinase	Aurora-A_bind	739	70	1	0.649289	395.921	13.135	0.994084	138.854	4.60658	0.348636	322.46
1052	ARID	SWIRM	731	35	0	0.582649	912.876	22.0744	0.972907	380.989	9.21278	0.406043	322.447
1053	HRDC	RRM_1	10669	219	0	0.406227	553.687	2.47633	1	328.764	1.47038	0.593773	322.013
1054	Helicase_C	TFIIH_BTF_p62_N	660	44	0	0.636364	101.022	20.1203	0.982109	36.7352	7.31646	0.357131	321.924
1055	SAP	NUC194	769	13	0	0.483254	1577.01	47.9097	0.900147	814.916	24.7572	0.465148	321.843
1056	AAA	ARID	2492	148	0	0.594326	110.524	5.35056	1	44.8369	2.17058	0.405674	321.246
1057	RRM_1	LisH	5435	373	0	0.676471	98.5659	2.66114	1	31.889	0.860957	0.323529	321.137
1058	DEAD	DUF1115	1637	44	0	0.462585	312.062	13.5621	0.969735	167.707	7.28847	0.52115	320.693
1059	DEAD	PRP3	1637	44	0	0.462585	312.062	13.5621	0.969735	167.707	7.28847	0.52115	320.693
1060	FAT	Kinesin	1444	70	0	0.547729	155.253	10.1243	1	70.2163	4.57894	0.452271	320.525
1061	PI3_PI4_kinase	Myb_DNA-binding	1449	52	0	0.531429	204.399	13.1489	1	95.7755	6.16118	0.468571	320.382
1062	PHD	KH_1	8448	309	0	0.36235	328.063	1.626	0.999994	209.189	1.03682	0.637646	320.376
1063	BRCT	zf-B_box	2513	84	0	0.33783	319.213	5.75522	0.98535	211.373	3.81094	0.65247	320.119
1064	ARID	ARID	196	27	0	0.494253	139.031	23.3864	0.995646	70.3146	11.8276	0.503545	319.346
1065	Helicase_C	S1	8440	279	1	0.471924	134.833	2.16601	1	71.2021	1.14382	0.528076	319.125
1066	FATC	Histone	807	35	0	0.521368	400.794	19.045	0.9709	191.833	9.11557	0.464704	319.045
1067	DEAD	Topoisom_I	7297	98	0	0.302026	971.404	4.66075	0.996796	678.015	3.25309	0.695738	318.802
1068	DEAD	Topoisom_I_N	7297	98	0	0.302026	971.404	4.66075	0.996796	678.015	3.25309	0.695738	318.802
1069	14-3-3	RRM_1	27682	614	1	0.496296	176.17	1.02979	1	88.7375	0.518711	0.503704	318.489
1070	RRM_1	Transket_pyr	10027	329	0	0.492286	162.199	1.90359	0.999538	82.3509	0.966482	0.507479	317.972
1071	Myb_DNA-binding	Amino_oxidase	720	12	1	0.48542	2413.81	51.372	0.971682	1242.1	26.435	0.500008	317.22
1072	PHD	Metallophos	2390	147	0	0.627172	61.6389	5.76812	0.998033	22.9807	2.15052	0.372095	316.126
1073	BAT2_N	RRM_1	4514	207	0	0.706897	69.6913	5.20494	1	20.4267	1.52558	0.293103	315.796
1074	WD40	Med15	352	42	0	0.535354	296.712	16.1803	0.99935	137.866	7.51811	0.464344	315.761
1075	DEAD	AhpC-TSA	13020	213	0	0.451791	382.293	2.70281	1	209.576	1.48171	0.548209	315.603
1076	DEAD	1-cysPrx_C	13020	213	0	0.451791	382.293	2.70281	1	209.576	1.48171	0.548209	315.603
1077	C2	DEAD	2711	449	1	0.636364	63.7083	1.93256	0.999915	23.1666	0.702751	0.363605	315.535
1078	WD40	IQ	4269	234	1	0.577488	155.717	3.17572	1	65.7922	1.34178	0.422512	313.976
1079	Helicase_C	SET	5257	440	0	0.755102	51.9285	2.91299	1	12.7172	0.713385	0.244898	313.889
1080	Biotin_lipoyl	E1_dh	729	24	0	0.430025	1418.86	22.9362	0.997964	808.714	13.0731	0.568814	313.754
1081	Helicase_C	RNA_pol_Rpb1_1	7781	189	1	0.421115	557.204	2.86701	1	322.557	1.65967	0.578885	313.677
1082	Helicase_C	RNA_pol_Rpb1_2	7781	189	1	0.421115	557.204	2.86701	1	322.557	1.65967	0.578885	313.677
1083	Helicase_C	RNA_pol_Rpb1_5	7781	189	1	0.421115	557.204	2.86701	1	322.557	1.65967	0.578885	313.677
1084	Helicase_C	RNA_pol_Rpb1_3	7781	189	1	0.421115	557.204	2.86701	1	322.557	1.65967	0.578885	313.677
1085	Helicase_C	RNA_pol_Rpb1_4	7781	189	1	0.421115	557.204	2.86701	1	322.557	1.65967	0.578885	313.677
1086	HEAT	SNF2_N	7031	257	0	0.457447	190.965	2.24655	0.99963	103.608	1.21887	0.542353	313.251
1087	Pkinase	HMG_box	4384	465	0	0.65285	193.277	1.93763	1	67.0962	0.67265	0.34715	312.782
1088	AAA	zf-C3HC4	4246	287	0	0.552553	201.34	2.42471	0.999711	90.0891	1.08493	0.447318	311.375
1089	SH3_1	SAP	805	139	1	0.774648	152.84	9.93765	1	34.4429	2.23947	0.225352	311.287
1090	Y_phosphatase	RRM_1	938	212	1	0.853659	279.129	10.0301	0.999952	40.8481	1.46782	0.146334	311.179
1091	PHD	QLQ	1998	65	0	0.395789	163.478	7.91897	0.896258	98.7748	4.78473	0.541529	311.007
1092	ARID	BAH	754	59	0	0.572901	159.52	12.2997	0.99893	68.1309	5.25317	0.426642	309.937
1093	WD40	Kelch_1	503	99	1	0.52381	49.5833	6.56528	0.995082	23.6111	3.12633	0.473849	309.506
1094	Helicase_C	ROKNT	12689	85	0	0.192845	2499.27	4.50969	0.942637	2017.3	3.64002	0.760854	309.402
1095	RRM_1	Nucleoplasmin	12506	119	0	0.324961	1121.49	3.84893	1	757.052	2.59818	0.675039	309.183
1096	Sec23_BS	Sec23_trunk	62	26	1	0.5	284.451	23.6899	0.960419	142.226	11.8449	0.48021	307.968
1097	Sec23_trunk	zf-Sec23_Sec24	62	26	1	0.5	284.451	23.6899	0.960419	142.226	11.8449	0.48021	307.968
1098	Sec23_helical	zf-Sec23_Sec24	62	26	0	0.5	284.451	23.6899	0.960419	142.226	11.8449	0.48021	307.968
1099	Sec23_BS	zf-Sec23_Sec24	62	26	1	0.5	284.451	23.6899	0.960419	142.226	11.8449	0.48021	307.968
1100	Sec23_helical	Sec23_trunk	62	26	1	0.5	284.451	23.6899	0.960419	142.226	11.8449	0.48021	307.968
1101	Sec23_BS	Sec23_helical	62	26	1	0.5	284.451	23.6899	0.960419	142.226	11.8449	0.48021	307.968
1102	ECH	RRM_1	1913	298	0	0.7	29.1007	3.44129	0.999992	8.7302	1.03239	0.299997	307.651
1103	Ank	GIT_SHD	126	21	0	0.375	623.716	23.4328	0.985274	389.822	14.6455	0.615796	307.555
1104	FERM_M	Helicase_C	6515	395	0	0.651064	118.88	2.22985	1	41.4815	0.778076	0.348936	307.34
1105	Pkinase	Cullin_Nedd8	1352	190	0	0.707692	26.4581	5.51473	1	7.7339	1.612	0.292308	306.28
1106	WD40	SH2	2445	313	0	0.710744	39.0943	3.37511	1	11.3083	0.976272	0.289256	305.573
1107	Pkinase	Ribonuc_red_sm	1147	98	1	0.569444	248.122	7.23668	0.997675	106.83	3.11579	0.429554	305.348
1108	DEAD	GUCT	8581	101	0	0.402927	975.517	5.06294	0.945096	582.455	3.02294	0.564291	305.317
1109	RRM_1	MutS_II	11721	242	0	0.389297	318.372	2.064	0.997986	194.431	1.26049	0.609473	305.04
1110	RRM_1	MutS_IV	11721	242	0	0.389297	318.372	2.064	0.997986	194.431	1.26049	0.609473	305.04
1111	RRM_1	MutS_III	11721	242	0	0.389297	318.372	2.064	0.997986	194.431	1.26049	0.609473	305.04
1112	RRM_1	MutS_V	11721	242	1	0.389297	318.372	2.064	0.997986	194.431	1.26049	0.609473	305.04
1113	RRM_1	DnaJ	1680	283	0	0.4	22.2226	1.79491	1	13.3336	1.07695	0.6	304.776
1114	Helicase_C	NOP5NT	9685	151	0	0.389068	233.421	3.30133	1	142.604	2.01689	0.610932	304.551
1115	SNF2_N	SWIB	995	60	0	0.507692	251.209	10.2962	0.990221	123.672	5.06892	0.487493	304.135
1116	RRM_1	EFG_C	9174	123	0	0.398917	620.23	4.09557	1	372.81	2.46178	0.601083	302.799
1117	RRM_1	MutS_I	11715	240	1	0.389297	318.372	2.064	0.997986	194.431	1.26049	0.609473	302.519
1118	AAA	zf-CCCH	5562	153	0	0.275838	386.485	2.72846	0.999972	279.878	1.97585	0.724142	302.305
1119	DEAD	Chromo	11843	385	0	0.475452	143.962	1.49401	1	75.5151	0.783677	0.524548	301.716
1120	WD40	Cyclin_N	1143	142	1	0.56	44.5515	4.8243	1	19.6026	2.12269	0.44	301.423
1121	WD40	Surp	2571	179	0	0.540984	84.4255	3.66181	1	38.7527	1.68083	0.459016	300.869
1122	Pkinase_C	RRM_1	4203	511	0	0.764706	111.183	2.49303	1	26.1607	0.586594	0.235294	299.75
1123	BAH	FATC	670	20	0	0.571587	678.031	34.9704	0.995062	290.477	14.9818	0.426297	299.635
1124	PDZ	CH	1231	160	1	0.73913	89.2189	7.17194	1	23.2745	1.87094	0.26087	299.35
1125	DEAD	GTF2I	10637	98	0	0.224307	2233.87	3.93715	1	1732.8	3.05402	0.775693	299.294
1126	SPRY	LisH	347	38	0	0.272727	74.6339	10.805	0.999015	54.2792	7.85817	0.726557	298.611
1127	AAA	tRNA_anti	4353	122	1	0.5	190.888	4.89406	1	95.4438	2.44703	0.5	298.538
1128	PHD	zf-MYND	565	36	1	0.646465	698.506	23.4428	0.986606	246.946	8.28787	0.3488	298.363
1129	Pkinase	Metallophos	2427	289	1	0.727273	46.0751	3.78067	1	12.5659	1.03109	0.272727	297.985
1130	Pkinase	zf-B_box	4525	387	0	0.688431	119.606	2.46853	1	37.2657	0.769118	0.311569	297.649
1131	DEAD	ELM2	12496	299	0	0.415507	297.397	1.70247	0.999374	173.827	0.995082	0.584127	297.53
1132	Ank	Metallophos	937	116	0	0.4375	66.3752	4.55845	1	37.3361	2.56413	0.5625	297.439
1133	Helicase_C	Ssl1	841	103	0	0.666667	23.2644	8.63074	0.993887	7.75479	2.87691	0.331296	296.322
1134	WD40	efhand	2359	283	0	0.747126	345.154	4.13147	1	87.2803	1.04474	0.252874	295.661
1135	RRM_1	LUC7	3248	162	1	0.619835	57.8931	4.78935	0.999151	22.009	1.82074	0.379842	294.961
1136	Pkinase	IQ	2764	213	1	0.662624	214.793	4.09536	0.999995	72.4661	1.38168	0.337374	294.297
1137	FHA	SMC_hinge	1448	62	1	0.629966	106.99	12.8247	0.999961	39.5898	4.74557	0.37002	294.225
1138	Pkinase	TIP49	5666	302	1	0.730081	124.49	3.60759	1	33.6022	0.973755	0.269919	294.074
1139	Helicase_C	K_tetra	2755	255	0	0.875	302.275	9.21944	1	37.7844	1.15243	0.125	293.87
1140	TPR_1	Med26	480	40	0	0.717579	225.476	25.9988	0.963144	63.6791	7.34259	0.272012	293.704
1141	BRCT	Rep_fac_C	4098	35	0	0.287445	1007.89	11.7602	0.961261	718.177	8.37977	0.684952	293.292
1142	WD40	BTB	2784	382	0	0.681462	54.8272	2.4093	1	17.4645	0.767455	0.318538	293.168
1143	PH	HATPase_c	2436	158	0	0.523599	938.996	3.89124	1	447.339	1.85379	0.476401	292.899
1144	Biotin_lipoyl	DEAD	8281	259	0	0.668508	663.54	3.40826	0.999852	219.958	1.12981	0.331443	292.62
1145	Pkinase	MutS_III	2597	193	0	0.652803	73.8787	4.36089	0.999554	25.6505	1.51409	0.347042	292.219
1146	Pkinase	MutS_V	2597	193	1	0.652803	73.8787	4.36089	0.999554	25.6505	1.51409	0.347042	292.219
1147	Pkinase	MutS_I	2597	193	1	0.652803	73.8787	4.36089	0.999554	25.6505	1.51409	0.347042	292.219
1148	Pkinase	MutS_II	2597	193	1	0.652803	73.8787	4.36089	0.999554	25.6505	1.51409	0.347042	292.219
1149	Pkinase	MutS_IV	2597	193	0	0.652803	73.8787	4.36089	0.999554	25.6505	1.51409	0.347042	292.219
1150	RhoGEF	HMG_box	1385	105	0	0.59751	73.4193	6.90709	1	29.5505	2.78003	0.40249	291.903
1151	PHD	zf-C3HC4	2064	185	1	0.578947	218.012	3.74358	0.999292	91.7945	1.57624	0.420754	291.605
1152	WD40	BRK	5591	284	0	0.48289	104.174	1.98331	0.992804	53.8692	1.02559	0.513389	291.267
1153	HEAT	RhoGEF	2422	154	0	0.364279	533.102	2.9748	1	338.904	1.89114	0.635721	291.236
1154	Homeobox	SNF2_N	1177	135	0	0.722222	312.72	7.75253	0.99987	86.8668	2.15348	0.277742	290.72
1155	AAA	IQ	4574	138	0	0.352827	745.386	3.25404	1	482.394	2.10593	0.647173	290.618
1156	SH3_1	FragX_IP	30	7	0	0.375	427.089	66.4192	0.914747	266.93	41.512	0.571717	290.584
1157	zf-C2H2	zf-C2H2	190	34	1	0.5	197.472	17.0885	1	98.7358	8.54425	0.5	290.505
1158	RRM_1	EFG_IV	9158	118	0	0.398917	620.23	4.09557	1	372.81	2.46178	0.601083	290.49
1159	PHD	zf-B_box	3299	179	1	0.437661	196.02	2.88457	1	110.23	1.62211	0.562339	290.357
1160	bZIP_1	bZIP_1	98	17	1	0.565217	163.605	39.2474	0.999697	71.1325	17.0641	0.434651	290.09
1161	AAA	DNA_pol_B_exo	976	50	0	0.721739	276.776	20.8155	0.99926	77.016	5.79213	0.278055	289.607
1162	AAA	DNA_pol_B	976	50	1	0.721739	276.776	20.8155	0.99926	77.016	5.79213	0.278055	289.607
1163	WD40	FERM_M	2607	272	0	0.639576	26.5284	2.95177	0.999912	9.56149	1.06389	0.360392	289.378
1164	PCI	KOW	68	16	0	0.804878	251.532	92.6633	0.999996	49.0794	18.0806	0.195121	289.29
1165	Pkinase_C	Helicase_C	4108	435	1	0.6	177.907	1.66232	1	71.1626	0.664928	0.4	289.244
1166	DEAD	zf-PARP	10064	98	0	0.256595	1860.39	3.96946	0.988193	1383.02	2.95092	0.734628	289.19
1167	Pkinase	UCH	1150	197	1	0.647059	16.882	4.15276	1	5.95834	1.46568	0.352941	288.739
1168	DEAD	GYF	2471	90	0	0.6	106.529	8.00247	0.998624	42.6114	3.20099	0.39945	288.089
1169	RRM_1	JmjN	1632	228	0	0.835616	80.684	7.68532	1	13.2631	1.26334	0.164384	288.042
1170	PH	CH	1933	204	1	0.434963	248.718	2.4985	1	140.535	1.41174	0.565037	287.996
1171	PHD	Linker_histone	3342	168	0	0.534286	511.231	3.66942	0.999554	238.087	1.7089	0.465507	287.095
1172	WD40	Ras	5063	528	1	0.667351	40.5611	1.63272	1	13.4926	0.543122	0.332649	286.769
1173	Helicase_C	MutS_IV	11076	175	1	0.352423	561.09	2.51802	1	363.349	1.63061	0.647577	285.357
1174	Helicase_C	MutS_II	11076	175	1	0.352423	561.09	2.51802	1	363.349	1.63061	0.647577	285.357
1175	Helicase_C	MutS_V	11076	175	1	0.352423	561.09	2.51802	1	363.349	1.63061	0.647577	285.357
1176	Helicase_C	MutS_III	11076	175	1	0.352423	561.09	2.51802	1	363.349	1.63061	0.647577	285.357
1177	DEAD	BRK	10431	208	0	0.381818	340.195	2.21116	1	210.302	1.3669	0.618182	284.315
1178	AAA	SWIRM	5979	101	0	0.348936	419.613	4.32281	0.99377	273.195	2.81443	0.647008	284.257
1179	Biotin_lipoyl	AAA	4415	158	0	0.67624	690.518	5.53	0.999959	223.562	1.79039	0.323747	282.882
1180	SET	TPR_1	322	56	0	0.36	20.1027	7.86549	1	12.8657	5.03392	0.64	281.899
1181	Pkinase	Fip1	1349	97	0	0.608483	71.8944	7.40538	0.999999	28.1479	2.89933	0.391517	281.235
1182	Helicase_C	MutS_I	11067	172	1	0.352423	561.09	2.51802	1	363.349	1.63061	0.647577	280.465
1183	C2	RhoGAP	249	37	1	0.52381	168.334	15.8984	0.997176	80.1592	7.57069	0.474846	280.115
1184	Helicase_C	Nucleoplasmin	10332	87	0	0.289575	1025.26	4.52734	0.970725	728.367	3.21633	0.689627	279.821
1185	WD40	Acetyltransf_1	177	39	1	0.571429	132	16.7369	1	56.5714	7.17296	0.428571	279.745
1186	WD40	Prp31_C	861	59	0	0.577689	120.148	11.2232	0.999522	50.7397	4.73968	0.422109	279.641
1187	Pkinase	G-patch	2071	264	0	0.540984	34.3374	2.30655	1	15.7614	1.05875	0.459016	279.509
1188	BRK	SWIRM	1194	19	0	0.351159	1574.64	22.6545	0.900548	1021.69	14.6992	0.584313	279.285
1189	Helicase_C	Tfb4	818	46	0	0.643836	100.641	17.0095	0.985116	35.8449	6.05819	0.350863	278.677
1190	BAH	Kinesin	2836	106	0	0.391525	283.172	4.31421	1	172.303	2.62509	0.608475	278.259
1191	Actin	Actin	357	27	1	0.5	340.694	20.5905	0.992731	170.347	10.2952	0.496365	277.971
1192	Alpha_adaptinC2	Helicase_C	2948	262	0	0.73494	68.7144	3.99698	1	18.2135	1.05944	0.26506	277.573
1193	GATA	SMC_hinge	2497	31	0	0.420043	520.297	15.4368	0.917228	301.75	8.95271	0.531953	277.534
1194	Helicase_C	Drf_GBD	9210	292	0	0.559033	151.224	2.15456	1	66.6847	0.95009	0.440967	277.426
1195	Helicase_C	Drf_FH3	9210	292	0	0.559033	151.224	2.15456	1	66.6847	0.95009	0.440967	277.426
1196	RRM_1	HIRAN	7177	110	0	0.403737	209.991	4.22896	0.981981	125.21	2.52157	0.585519	277.373
1197	AAA	HA2	5658	183	0	0.444809	340.541	2.72846	1	189.065	1.51482	0.555191	277.212
1198	CH	IBN_N	2779	178	0	0.399293	262.369	2.5841	0.994089	157.607	1.55228	0.597156	276.307
1199	AAA	DUF1605	5655	182	0	0.444809	340.541	2.72846	1	189.065	1.51482	0.555191	275.697
1200	WD40	MIF4G	2882	232	0	0.63135	71.8672	3.22143	1	26.4939	1.18758	0.36865	275.519
1201	Helicase_C	MA3	7284	256	1	0.477352	252.965	2.05733	1	132.212	1.07526	0.522648	275.266
1202	Helicase_C	Peptidase_C12	961	73	0	0.75	67.0757	15.0636	0.999827	16.7689	3.7659	0.249957	274.911
1203	YEATS	Helicase_C	1947	145	0	0.65	127.692	5.40235	1	44.6924	1.89082	0.35	274.169
1204	LRR_1	zf-C3HC4	604	77	1	0.571429	206.447	8.29691	1	88.4773	3.55582	0.428571	273.798
1205	HMG_box	Hist_deacetyl	1624	50	0	0.496667	313.339	10.8783	0.99926	157.714	5.4754	0.502961	273.77
1206	KH_1	BRCT	5868	118	0	0.240591	1357.56	3.05194	1	1030.94	2.31767	0.759409	273.485
1207	RRM_1	ROKNT	14522	123	0	0.244486	1026.36	2.94263	0.998845	775.426	2.2232	0.754641	273.454
1208	SH2	DEAD	5464	416	0	0.69697	73.6809	2.16601	1	22.3275	0.656367	0.30303	273.049
1209	Helicase_C	DUF1227	341	36	1	0.72	244.445	27.0846	0.948421	68.4446	7.58368	0.265558	273.013
1210	C2	RhoGEF	199	36	1	0.52381	168.334	15.8984	0.998848	80.1592	7.57069	0.475642	272.545
1211	Pkinase	zf-C3HC4	2183	279	1	0.533333	79.3494	2.09283	1	37.0297	0.976652	0.466667	272.486
1212	HMG_box	GATA	2622	93	0	0.516888	156.499	6.06448	1	75.6064	2.92982	0.483112	272.473
1213	KH_1	HATPase_c	5823	86	0	0.224346	3435.69	4.08463	0.999999	2664.9	3.16825	0.775653	272.47
1214	Pkinase	CK_II_beta	195	23	1	0.504274	216.124	23.8897	0.993399	107.138	11.8428	0.492454	272.384
1215	Bromodomain	ZZ	467	46	1	0.346939	277.031	9.05985	0.991837	180.918	5.91664	0.64773	272.165
1216	RRM_1	2-oxoacid_dh	10576	330	0	0.665844	362.289	2.46247	0.989342	121.061	0.822852	0.330595	271.541
1217	FHA	SMC_N	1409	57	1	0.629966	106.99	12.8247	0.999961	39.5898	4.74557	0.37002	270.497
1218	Helicase_C	PPP4R2	83	20	0	0.741935	454.04	52.3832	0.992351	117.172	13.5182	0.256091	270.365
1219	RRM_1	QLQ	10069	192	0	0.391144	292.013	2.31228	0.999902	177.794	1.40785	0.608797	270.306
1220	ARID	PI3_PI4_kinase	366	29	0	0.605307	117.506	23.5621	0.997232	46.3789	9.29981	0.393601	269.694
1221	PH	BRCT	2286	185	0	0.480808	265.569	2.80491	1	137.881	1.45629	0.519192	269.413
1222	WD40	SH3_1	2028	402	1	0.6875	64.2105	2.14453	1	20.0658	0.670165	0.3125	269.406
1223	HMG_box	Chromo	1802	108	0	0.660739	113.718	7.35048	0.999842	38.5801	2.49374	0.339208	269.323
1224	WD40	FERM_N	2520	253	0	0.639576	26.5284	2.95177	0.999912	9.56149	1.06389	0.360392	269.164
1225	DEAD	PFK	5365	128	1	0.520276	192.327	4.37797	0.997172	92.2637	2.10021	0.478367	268.828
1226	GATA	SMC_N	2439	30	0	0.420043	520.297	15.4368	0.977062	301.75	8.95271	0.566654	268.581
1227	Helicase_C	CPSF_A	11130	147	0	0.360041	884.205	2.84637	0.999958	565.855	1.82156	0.639932	267.77
1228	14-3-3	Helicase_C	23156	440	0	0.495208	209.512	1.20476	1	105.76	0.608151	0.504792	267.587
1229	WD40	RNA_pol_Rpb2_6	1621	113	1	0.574803	106.025	5.56274	0.999904	45.0815	2.36526	0.425156	267.274
1230	WD40	RNA_pol_Rpb2_5	1621	113	1	0.574803	106.025	5.56274	0.999904	45.0815	2.36526	0.425156	267.274
1231	WD40	RNA_pol_Rpb2_7	1621	113	1	0.574803	106.025	5.56274	0.999904	45.0815	2.36526	0.425156	267.274
1232	WD40	RNA_pol_Rpb2_1	1621	113	1	0.574803	106.025	5.56274	0.999904	45.0815	2.36526	0.425156	267.274
1233	WD40	RNA_pol_Rpb2_2	1621	113	1	0.574803	106.025	5.56274	0.999904	45.0815	2.36526	0.425156	267.274
1234	WD40	RNA_pol_Rpb2_3	1621	113	1	0.574803	106.025	5.56274	0.999904	45.0815	2.36526	0.425156	267.274
1235	Mov34	S1	593	28	0	0.496144	111.874	18.8379	0.956557	56.3685	9.49159	0.481967	265.765
1236	RhoGAP	RhoGAP	335	35	1	0.52381	168.334	15.8984	0.998985	80.1592	7.57069	0.475707	264.974
1237	AAA	IBN_N	8211	241	0	0.450753	297.62	2.00083	1	163.467	1.09895	0.549247	264.847
1238	WD40	RNase_PH_C	5366	324	0	0.547059	102.676	1.80261	1	46.506	0.816477	0.452941	264.538
1239	Mov34	Sec63	581	10	0	0.3	4032.66	37.7626	0.970083	2822.86	26.4338	0.679058	264.338
1240	K_tetra	K_tetra	113	11	1	0.183099	987.514	29.4054	0.99541	806.701	24.0213	0.813152	264.235
1241	Pkinase	PWWP	2388	233	0	0.652803	119.499	3.26537	1	41.4897	1.13373	0.347197	264.158
1242	E1_dh	Transket_pyr	339	15	1	0.194444	448.493	21.8451	0.984302	361.286	17.5975	0.79291	263.962
1243	Actin	DEAD	9974	319	0	0.44403	570.992	1.4879	0.99917	317.454	0.827227	0.555509	263.886
1244	ARID	SWIB	341	27	0	0.508772	342.092	19.824	0.997189	168.045	9.73812	0.489847	262.929
1245	RRM_1	Hist_deacetyl	16315	307	1	0.342556	391.489	1.30107	1	257.382	0.855382	0.657444	262.602
1246	Pkinase	Amidohydro_1	721	92	0	0.734317	210.575	10.7337	0.999927	55.9462	2.85176	0.265663	262.362
1247	Helicase_C	HDAC_interact	2032	88	0	0.72752	245.794	10.9284	1	66.9737	2.97776	0.27248	262.043
1248	Chromo	Hist_deacetyl	1232	30	0	0.532513	882.152	18.6805	0.999685	412.394	8.73287	0.46734	261.986
1249	zf-C2H2	IBN_N	778	83	0	0.608511	45.5641	8.0603	1	17.8379	3.15552	0.391489	261.908
1250	WD40	PRP4	1084	68	0	0.541818	93.2111	8.40089	0.988501	42.7077	3.84913	0.452913	261.741
1251	HEAT	KH_1	6918	181	0	0.451691	1022.01	2.63248	0.998443	560.377	1.44341	0.547455	261.258
1252	SAP	Bromodomain	3314	159	0	0.459266	168.079	3.03788	0.99991	90.8859	1.64268	0.540686	261.187
1253	Helicase_C	Med26	7007	190	0	0.502098	108.865	2.75732	1	54.2041	1.37288	0.497902	260.847
1254	Bromodomain	GATA	3152	110	0	0.397739	249.139	3.93275	0.997609	150.047	2.36854	0.600821	260.54
1255	AAA	LRR_1	5020	403	0	0.28	54.7159	0.896432	1	39.3955	0.645431	0.72	260.109
1256	BTB	SAP	915	111	0	0.718009	181.031	8.30381	1	51.049	2.34159	0.281991	259.917
1257	SH2	HMG_box	640	71	1	0.813387	110.89	19.617	0.999376	20.6935	3.66078	0.186496	259.915
1258	AAA	efhand	2410	188	1	0.777778	259.253	6.21325	0.999703	57.6118	1.38072	0.222156	259.576
1259	WD40	zf-PARP	5254	192	0	0.508603	235.1	2.74053	0.994855	115.527	1.34669	0.488869	258.564
1260	Pkinase	TBC	1151	176	0	0.717949	109.124	5.1959	1	30.7785	1.46551	0.282051	257.93
1261	ARID	PWWP	384	31	0	0.645349	698.506	23.4428	0.912624	247.726	8.31403	0.323663	257.735
1262	Helicase_C	2-oxoacid_dh	8900	228	0	0.668508	663.54	3.40826	0.999852	219.958	1.12981	0.331443	257.596
1263	CH	Bromodomain	2634	197	0	0.472712	205.48	2.47946	0.999597	108.347	1.30739	0.527076	257.556
1264	Pkinase	tRNA_anti	2804	248	0	0.589744	52.8658	2.52807	1	21.6885	1.03716	0.410256	257.215
1265	PHD	Hormone_recep	1363	121	0	0.641278	54.4151	5.92017	1	19.5199	2.1237	0.358722	256.968
1266	PHD	zf-C4	1363	121	0	0.641278	54.4151	5.92017	1	19.5199	2.1237	0.358722	256.968
1267	Pkinase	LIM	3050	371	1	0.75	53.3895	2.76674	1	13.3474	0.691686	0.25	256.616
1268	WD40	GCFC	491	40	0	0.522124	83.8019	13.4136	0.999789	40.0469	6.41004	0.477775	256.402
1269	Homeobox	PHD	994	119	1	0.722222	312.72	7.75253	1	86.8668	2.15348	0.277778	256.264
1270	CH	GIT_SHD	187	15	0	0.218391	728.653	21.8046	0.91425	569.522	17.0427	0.714586	255.64
1271	Ank	zf-B_box	1673	161	0	0.745283	155.942	6.22803	0.999151	39.7211	1.58638	0.254501	255.408
1272	TPR_2	TPR_1	203	15	1	0.338462	677.923	25.7021	0.986939	448.472	17.0029	0.652898	255.044
1273	Linker_histone	Histone	1729	78	0	0.483622	108.241	6.33167	0.99877	55.8934	3.26953	0.515742	255.024
1274	WD40	Ribosomal_L7Ae	6010	313	1	0.480663	203.539	1.5688	1	105.705	0.814737	0.519337	255.013
1275	Pkinase	Citrate_synt	280	40	0	0.738636	549.174	24.3692	0.995977	143.534	6.36923	0.260312	254.769
1276	Pkinase	ATP-grasp_2	280	40	0	0.738636	549.174	24.3692	0.995977	143.534	6.36923	0.260312	254.769
1277	Pkinase	CoA_binding	280	40	0	0.738636	549.174	24.3692	0.995977	143.534	6.36923	0.260312	254.769
1278	Pkinase	Ligase_CoA	280	40	0	0.738636	549.174	24.3692	0.995977	143.534	6.36923	0.260312	254.769
1279	Pkinase	Adaptin_N	1985	286	0	0.6621	28.4069	2.6352	1	9.59869	0.890433	0.3379	254.664
1280	DEAD	RasGAP_C	7481	106	0	0.312375	678.489	3.48343	1	466.547	2.39529	0.687625	253.901
1281	PHD	zf-CCCH	2967	127	0	0.35369	257.424	3.09296	0.999704	166.376	1.99901	0.646119	253.875
1282	Helicase_C	W2	6929	236	0	0.477352	252.965	2.05733	1	132.212	1.07526	0.522648	253.761
1283	Chromo	SWIRM	1279	37	0	0.58011	986.66	16.3333	0.743606	414.288	6.85819	0.312233	253.753
1284	Pkinase	RNA_pol_Rpb1_1	1581	157	0	0.639024	35.9317	4.47564	0.989794	12.9705	1.6156	0.357292	253.649
1285	Pkinase	RNA_pol_Rpb1_2	1581	157	0	0.639024	35.9317	4.47564	0.989794	12.9705	1.6156	0.357292	253.649
1286	Pkinase	RNA_pol_Rpb1_3	1581	157	0	0.639024	35.9317	4.47564	0.989794	12.9705	1.6156	0.357292	253.649
1287	Pkinase	RNA_pol_Rpb1_4	1581	157	0	0.639024	35.9317	4.47564	0.989794	12.9705	1.6156	0.357292	253.649
1288	Pkinase	RNA_pol_Rpb1_5	1581	157	0	0.639024	35.9317	4.47564	0.989794	12.9705	1.6156	0.357292	253.649
1289	AAA	RFC1	2670	31	1	0.33122	1007.89	12.2233	0.971826	674.056	8.17467	0.649937	253.415
1290	FATC	Ku_C	517	8	0	0.483254	2604.69	61.2559	0.895368	1345.96	31.6538	0.462678	253.23
1291	FATC	Ku_N	517	8	0	0.483254	2604.69	61.2559	0.895368	1345.96	31.6538	0.462678	253.23
1292	FAT	Ku_N	636	8	0	0.483254	2604.69	61.2559	0.895368	1345.96	31.6538	0.462678	253.23
1293	FAT	Ku_C	636	8	0	0.483254	2604.69	61.2559	0.895368	1345.96	31.6538	0.462678	253.23
1294	FAT	Ku	636	8	0	0.483254	2604.69	61.2559	0.895368	1345.96	31.6538	0.462678	253.23
1295	FATC	Ku	517	8	0	0.483254	2604.69	61.2559	0.895368	1345.96	31.6538	0.462678	253.23
1296	DEAD	zf-C4_Topoisom	347	24	0	0.769231	764.462	45.6517	0.958111	176.414	10.535	0.221103	252.84
1297	HMG_box	HMG_box	1106	76	0	0.561033	147.494	7.57766	1	64.7452	3.32634	0.438967	252.802
1298	PH	SAP	1965	196	0	0.525154	169.659	2.71464	1	80.5617	1.28904	0.474846	252.651
1299	HMG_box	Amino_oxidase	526	18	0	0.654412	1387.97	40.5612	0.992875	479.665	14.0175	0.343126	252.314
1300	RFX_DNA_binding	HMG_box	847	48	0	0.572901	159.52	12.2997	0.999673	68.1309	5.25317	0.426959	252.152
1301	Kinesin	IBN_N	3472	158	0	0.432234	236.132	2.80221	1	134.067	1.591	0.567766	251.378
1302	bZIP_1	Jun	75	16	1	0.6	163.605	39.2474	0.999697	65.4419	15.699	0.399879	251.184
1303	ARID	FAT	359	27	0	0.605307	117.506	23.5621	0.997232	46.3789	9.29981	0.393601	251.095
1304	Helicase_C	PADR1	11338	85	0	0.256595	1860.39	3.96946	0.997609	1383.02	2.95092	0.741628	250.828
1305	Helicase_C	WGR	11338	85	0	0.256595	1860.39	3.96946	0.997609	1383.02	2.95092	0.741628	250.828
1306	Helicase_C	PARP_reg	11338	85	1	0.256595	1860.39	3.96946	0.997609	1383.02	2.95092	0.741628	250.828
1307	HMG_box	HSA	1266	47	0	0.459916	550.771	9.87076	0.999824	297.463	5.33104	0.539989	250.559
1308	RRM_1	Gelsolin	2266	302	0	0.68	83.6369	2.59043	0.999827	26.7638	0.828938	0.319945	250.339
1309	Helicase_C	B-block_TFIIIC	4941	76	0	0.501305	271.371	6.60331	0.98882	135.331	3.29304	0.493119	250.271
1310	zf-C2H2	DEAD	7649	770	1	0.5	75.702	0.649491	1	37.851	0.324745	0.5	250.054
1311	GYF	RRM_1	3814	186	1	0.650602	62.4613	3.84764	1	21.8238	1.34436	0.349398	250.05
1312	WD40	SET	2071	260	1	0.780488	49.4068	4.37175	1	10.8454	0.959652	0.219512	249.509
1313	RhoGEF	FHA	1160	89	0	0.60515	132.396	7.084	1	52.2764	2.79712	0.39485	248.943
1314	RFX_DNA_binding	SNF2_N	1924	90	1	0.522963	150.203	5.793	1	71.6526	2.76348	0.477037	248.713
1315	PHD	zf-RanBP	4376	182	0	0.485855	163.46	2.65601	0.99485	84.0422	1.36558	0.511497	248.535
1316	CAP_GLY	RRM_1	998	147	0	0.876923	245.342	13.735	1	30.196	1.69046	0.123077	248.498
1317	Helicase_C	Vps4_C	2232	121	0	0.745133	382.994	8.0552	1	97.6127	2.05301	0.254867	248.414
1318	Mov34	PWI	736	30	0	0.396752	202.605	13.7191	0.98981	122.221	8.27603	0.597101	248.281
1319	PHD	PABP	1701	90	0	0.642105	80.684	7.68532	0.998246	28.8764	2.75054	0.357267	247.548
1320	FERM_N	Helicase_C	6143	318	0	0.651064	118.88	2.22985	1	41.4815	0.778076	0.348936	247.428
1321	zf-C2H2	Chromo	845	96	1	0.604278	49.8317	6.49448	1	19.7195	2.57001	0.395722	246.721
1322	PHD	FATC	1527	68	0	0.482916	255.166	7.00875	0.999347	131.942	3.62411	0.516747	246.44
1323	BAH	HMG_box	1929	84	1	0.516888	156.499	6.06448	0.993958	75.6064	2.92982	0.480192	246.105
1324	WD40	RQC	1230	91	0	0.653277	129.556	7.79459	1	44.9201	2.70256	0.346723	245.933
1325	Actin	CH	1850	123	1	0.47185	551.868	3.77216	1	291.469	1.99227	0.52815	245.049
1326	Kinesin	DUF618	3026	106	0	0.373272	356.45	3.68668	0.998938	223.397	2.31054	0.626063	244.918
1327	Pkinase	Pkinase_Tyr	394	86	1	0.625	92.9871	7.58942	0.999892	34.8702	2.84603	0.37496	244.759
1328	DEAD	zf-C3H1	1152	44	0	0.68018	608.633	17.391	0.991241	194.653	5.56198	0.317018	244.727
1329	Actin	PHD	2588	169	1	0.529492	240.702	3.07209	1	113.252	1.44544	0.470508	244.279
1330	Pkinase	Sec63	1938	125	0	0.649936	177.907	5.56989	0.999456	62.2787	1.94982	0.349874	243.727
1331	ELM2	ELM2	736	30	0	0.5	314.901	16.237	0.97856	157.451	8.11848	0.48928	243.554
1332	HEAT	IBN_N	4269	149	1	0.366812	202.551	2.57743	0.994997	128.253	1.632	0.63002	243.168
1333	WD40	HSA	4597	237	0	0.48289	104.174	1.98331	0.999892	53.8692	1.02559	0.517054	243.064
1334	Helicase_C	Prp31_C	1911	61	0	0.546099	99.5798	8.77201	1	45.1993	3.98162	0.453901	242.879
1335	PWWP	JmjC	357	24	0	0.568504	698.506	23.4428	1	301.403	10.1155	0.431496	242.772
1336	Ank	zf-C2H2	596	80	1	0.75	163.984	12.1383	0.999976	40.9961	3.03457	0.249994	242.766
1337	FATC	Kinesin	1082	53	0	0.547729	155.253	10.1243	1	70.2163	4.57894	0.452271	242.684
1338	efhand	RRM_1	7413	593	1	0.768953	98.7897	1.77105	1	22.8251	0.409196	0.231047	242.653
1339	FragX_IP	Nckap1	21	4	0	0.454545	1591.92	111.006	0.991836	868.32	60.549	0.541001	242.196
1340	Pkinase	PRP1_N	931	82	0	0.660131	34.0078	8.69034	0.999741	11.5582	2.95358	0.339781	242.193
1341	Pkinase	Cse1	2250	193	0	0.56087	93.9939	2.85422	1	41.2756	1.25337	0.43913	241.901
1342	Pkinase	BAH	4134	354	1	0.648227	193.277	1.93763	1	67.9897	0.681607	0.351773	241.289
1343	WD40	MA3	2589	203	0	0.63135	71.8672	3.22143	1	26.4939	1.18758	0.36865	241.079
1344	Pkinase	FH2	2925	266	1	0.533156	84.1444	1.94097	1	39.2822	0.906131	0.466844	241.031
1345	Pkinase	Vinculin	492	73	1	0.688889	16.5171	10.612	0.976897	5.13865	3.3015	0.303923	241.01
1346	Kinesin	Septin	4233	139	0	0.358936	615.578	2.70176	1	394.624	1.732	0.641064	240.748
1347	FAT	Myb_DNA-binding	1377	39	0	0.531429	204.399	13.1489	0.991646	95.7755	6.16118	0.464657	240.286
1348	RRM_1	CSD	6715	225	0	0.549296	155.253	2.36685	1	69.973	1.06675	0.450704	240.019
1349	ARID	QLQ	464	22	0	0.522963	934.17	22.8399	0.898381	445.634	10.8955	0.428561	239.701
1350	RRM_1	RasGAP_C	10837	206	0	0.361533	446.957	1.82169	0.999549	285.367	1.16309	0.638178	239.597
1351	SNF2_N	WW	3367	117	0	0.453287	205.48	3.7323	1	112.338	2.04049	0.546713	238.738
1352	Helicase_C	SNF5	3465	70	0	0.574893	199.083	8.0192	0.99934	84.6317	3.40902	0.424826	238.631
1353	PHD	Histone	4046	245	1	0.540691	139.898	2.11939	1	64.2562	0.973454	0.459309	238.496
1354	DEAD	PRP4	1860	45	0	0.530547	268.477	11.2889	0.948861	126.038	5.29959	0.445446	238.482
1355	Helicase_C	NUC194	5500	76	0	0.469681	507.672	5.91241	0.802955	269.228	3.13546	0.425822	238.295
1356	ELM2	Amino_oxidase	515	9	0	0.48542	2413.81	51.372	0.971682	1242.1	26.435	0.500008	237.915
1357	PH	Oxysterol_BP	123	19	1	0.276596	198.623	17.304	0.999313	143.684	12.5178	0.722908	237.838
1358	Pkinase	Chromo	3712	360	0	0.598309	72.9677	1.643	1	29.3105	0.659978	0.401691	237.592
1359	Kinesin	MIF4G	1523	74	0	0.461187	160.54	5.95219	0.985624	86.5009	3.20712	0.531067	237.327
1360	BAH	UCH	535	55	0	0.736196	154.323	16.3536	0.999597	40.7111	4.31413	0.263697	237.277
1361	WD40	Fork_head	605	94	0	0.673469	88.8334	7.72781	1	29.0068	2.52337	0.326531	237.196
1362	FHA	BRCT	2138	79	1	0.401691	577.622	5.01368	0.999305	345.596	2.99973	0.597893	236.979
1363	Helicase_C	TBC	4404	412	0	0.751479	65.462	2.31446	1	16.2687	0.57519	0.248521	236.978
1364	RRM_1	RNA_pol_Rpb1_1	9082	243	0	0.431085	235.551	1.71365	1	134.008	0.974923	0.568915	236.906
1365	RRM_1	RNA_pol_Rpb1_2	9082	243	1	0.431085	235.551	1.71365	1	134.008	0.974923	0.568915	236.906
1366	RRM_1	RNA_pol_Rpb1_3	9082	243	1	0.431085	235.551	1.71365	1	134.008	0.974923	0.568915	236.906
1367	RRM_1	RNA_pol_Rpb1_4	9082	243	0	0.431085	235.551	1.71365	1	134.008	0.974923	0.568915	236.906
1368	RRM_1	RNA_pol_Rpb1_5	9082	243	0	0.431085	235.551	1.71365	1	134.008	0.974923	0.568915	236.906
1369	Mov34	UCH	433	45	0	0.509294	201.986	10.7107	0.993944	99.1157	5.2558	0.487735	236.511
1370	BAH	zf-C2H2	997	102	0	0.546028	73.5454	5.0991	1	33.3876	2.31485	0.453972	236.115
1371	Pkinase	Thioredoxin	1846	258	1	0.681818	33.4387	2.87292	1	10.6396	0.91411	0.318182	235.84
1372	LRR_1	TPR_1	921	136	1	0.686957	68.5493	5.52799	0.993754	21.4589	1.7305	0.311088	235.348
1373	2-oxoacid_dh	E1_dh	684	18	1	0.430025	1418.86	22.9362	0.997964	808.714	13.0731	0.568814	235.315
1374	BAH	SWIRM	1606	27	0	0.435169	1047.05	15.4267	0.981433	591.407	8.71348	0.554344	235.264
1375	Pkinase	RasGAP_C	2564	170	0	0.662624	214.793	4.09536	0.985887	72.4661	1.38168	0.332615	234.885
1376	SH3_1	FYVE	27	7	0	0.2	229.649	41.8916	0.978537	183.719	33.5133	0.782829	234.593
1377	ArfGap	ArfGap	149	16	1	0.375	623.716	23.4328	0.999424	389.822	14.6455	0.62464	234.328
1378	SAP	UCH	785	79	0	0.667897	82.4145	8.91919	0.997153	27.3701	2.96209	0.331158	234.005
1379	Bromodomain	SET	728	76	1	0.810811	141.926	16.261	1	26.851	3.0764	0.189189	233.806
1380	Helicase_C	Ku	11879	155	0	0.421525	357.548	2.60512	0.994177	206.833	1.507	0.575107	233.585
1381	Helicase_C	Ku_N	11879	155	0	0.421525	357.548	2.60512	0.994177	206.833	1.507	0.575107	233.585
1382	Helicase_C	Ku_C	11879	155	0	0.421525	357.548	2.60512	0.994177	206.833	1.507	0.575107	233.585
1383	WD40	Peptidase_M1	355	60	1	0.529412	13.7578	8.27137	1	6.47425	3.89241	0.470588	233.545
1384	Bromodomain	ELM2	2282	100	0	0.397739	249.139	3.87703	1	150.047	2.33498	0.602261	233.498
1385	RhoGAP	HATPase_c	2249	83	0	0.351643	1535.61	4.33104	0.999921	995.624	2.80806	0.648305	233.069
1386	RRM_1	PRP1_N	5390	107	0	0.504545	173	4.39258	0.999311	85.7136	2.17632	0.495113	232.867
1387	Arm	LisH	204	20	0	0.241379	152.918	15.3206	0.987047	116.007	11.6225	0.748794	232.451
1388	RRM_1	CBFNT	13026	218	0	0.402516	195.5	1.78308	0.9352	116.808	1.06536	0.558767	232.248
1389	RRM_1	PRP4	3256	97	0	0.622407	53.023	6.33663	0.996616	20.0211	2.39267	0.376316	232.089
1390	FHA	KH_1	3261	136	0	0.537884	371.979	3.68981	1	171.898	1.70512	0.462116	231.896
1391	PH	SNF2_N	3649	334	0	0.464583	193.695	1.29641	1	103.708	0.694118	0.535417	231.835
1392	Bromodomain	BRK	1514	72	1	0.459916	348.108	5.96114	1	188.008	3.21952	0.540084	231.805
1393	PHD	RMMBL	364	45	0	0.529412	126.222	10.9283	0.993977	59.3988	5.14274	0.467754	231.423
1394	DEAD	SWIRM	11518	160	0	0.386754	499.063	2.35525	0.997501	306.048	1.44435	0.611714	231.096
1395	DEAD	TIP49	18196	118	0	0.254987	1209.38	2.6193	0.960329	901.007	1.95141	0.715457	230.266
1396	RRM_1	zf-C5HC2	1439	182	0	0.835616	80.684	7.68532	1	13.2631	1.26334	0.164384	229.928
1397	DEAD	cwf21	5281	93	0	0.546667	518.79	5.44939	0.998459	235.185	2.47039	0.452635	229.746
1398	DEAD	GATA	17843	284	0	0.415507	297.397	1.38388	0.99485	173.827	0.808868	0.581483	229.718
1399	WD40	PAH	920	77	1	0.741935	271.572	11.5426	0.97719	70.0832	2.97874	0.252178	229.363
1400	ACC_central	RRM_1	1313	97	0	0.784946	366.89	10.9841	1	78.9012	2.36218	0.215054	229.131
1401	DEAD	MIF4G	6078	213	1	0.477352	252.965	2.05733	1	132.212	1.07526	0.522648	229.03
1402	SNF2_N	FATC	1662	57	1	0.541219	169.465	8.75269	1	77.7473	4.01557	0.458781	228.888
1403	RRM_1	Vault	2066	85	0	0.722054	282.207	9.68487	0.959716	78.4382	2.69187	0.266749	228.809
1404	14-3-3	KH_1	5447	98	0	0.521019	253.948	4.87209	0.992429	121.636	2.33364	0.475355	228.696
1405	SAP	zf-B_box	2268	89	0	0.439098	228.324	4.56455	1	128.067	2.56027	0.560902	227.864
1406	Ank	Homeobox	307	59	0	0.774436	265.545	17.0584	1	59.8973	3.84775	0.225564	227.018
1407	FHA	zf-C3HC4	853	76	1	0.644351	99.3375	8.38123	0.999999	35.3292	2.98077	0.355648	226.539
1408	WD40	HELP	443	82	0	0.636364	75.4814	7.59486	1	27.4478	2.76177	0.363636	226.465
1409	SNF2_N	zf-B_box	4091	167	0	0.438202	163.478	2.41324	1	91.8413	1.35575	0.561798	226.411
1410	PHD	Septin	5131	189	0	0.385294	255.839	1.94548	0.999919	157.265	1.1959	0.614656	226.025
1411	PHD	VWA	373	41	0	0.666667	85.0118	16.5193	0.983677	28.3373	5.50643	0.327892	225.763
1412	CH	zf-B_box	2456	134	0	0.320513	341.01	2.47946	0.999944	231.712	1.68476	0.679449	225.758
1413	Helicase_C	tRNA_anti	9842	260	1	0.534884	127.187	1.86641	1	59.1566	0.868098	0.465116	225.705
1414	FERM_M	DEAD	5029	293	0	0.654867	118.88	2.22985	1	41.0294	0.769595	0.345133	225.491
1415	RRM_1	PLU-1	1425	178	0	0.835616	80.684	7.68532	1	13.2631	1.26334	0.164384	224.875
1416	Kinesin	MA3	1419	70	0	0.461187	160.54	5.95219	0.999739	86.5009	3.20712	0.538672	224.498
1417	DEAD	FH2	7249	241	0	0.568998	151.224	2.15456	1	65.1777	0.928619	0.431002	223.797
1418	DEAD	S1	6553	195	1	0.471924	134.833	2.16601	0.998638	71.2021	1.14382	0.527357	223.045
1419	Pkinase	Drf_FH3	2833	246	0	0.533156	84.1444	1.94097	1	39.2822	0.906131	0.466844	222.908
1420	Pkinase	Drf_GBD	2833	246	0	0.533156	84.1444	1.94097	1	39.2822	0.906131	0.466844	222.908
1421	Pkinase	GTP_EFTU	2459	239	1	0.652174	46.9291	2.68101	1	16.3232	0.932524	0.347826	222.873
1422	RRM_1	HECT	7971	517	0	0.647059	95.9227	1.21956	1	33.8551	0.430432	0.352941	222.534
1423	WD40	W2	2484	187	0	0.63135	71.8672	3.22143	1	26.4939	1.18758	0.36865	222.078
1424	Helicase_C	Ndr	9356	122	0	0.341837	673.992	2.76109	0.968898	443.597	1.81725	0.637693	221.704
1425	PH	GIT_SHD	159	13	0	0.218391	728.653	21.8046	0.913261	569.522	17.0427	0.713813	221.554
1426	AAA	RFX_DNA_binding	2842	102	0	0.594326	110.524	5.35056	0.999402	44.8369	2.17058	0.405431	221.399
1427	RhoGEF	Histone	1171	101	1	0.667034	56.1593	6.57429	1	18.6991	2.18901	0.332966	221.091
1428	Pkinase	DUF1227	66	15	0	0.55102	152.171	32.771	0.975669	68.3216	14.7135	0.438055	220.702
1429	WD40	NUC194	2528	104	0	0.547926	747.801	4.69226	0.977945	338.062	2.12125	0.442104	220.61
1430	ArfGap	PHD	1399	124	0	0.714948	155.942	6.22803	0.999064	44.4517	1.77531	0.284785	220.139
1431	AAA	RFC-E_C	3640	32	0	0.252761	849.449	9.17247	0.941344	634.742	6.85403	0.703409	219.329
1432	Helicase_C	Tubulin	6246	162	0	0.513302	238.506	2.78051	0.998443	116.08	1.35327	0.48594	219.23
1433	Helicase_C	Tubulin_C	6246	162	0	0.513302	238.506	2.78051	0.998443	116.08	1.35327	0.48594	219.23
1434	Pkinase	GTP_EFTU_D2	2447	235	1	0.652174	46.9291	2.68101	1	16.3232	0.932524	0.347826	219.143
1435	Pkinase	Hormone_recep	1482	176	1	0.608815	33.0247	3.18095	0.999197	12.9188	1.24434	0.39087	219.004
1436	Pkinase	zf-C4	1482	176	1	0.608815	33.0247	3.18095	0.999197	12.9188	1.24434	0.39087	219.004
1437	Helicase_C	LisH	4530	266	0	0.671451	97.4559	2.50055	1	32.019	0.821553	0.328549	218.533
1438	RRM_1	Xpo1	7944	265	0	0.455867	307.485	1.5155	1	167.312	0.824633	0.544133	218.528
1439	WD40	BCAS2	875	57	0	0.708861	505.286	13.1656	0.998206	147.109	3.83301	0.290617	218.482
1440	RhoGAP	PHD	3024	151	0	0.346257	341.925	2.20931	0.998568	223.531	1.44432	0.652807	218.092
1441	Helicase_C	YL1_C	373	43	0	0.6	71.1626	12.6607	0.999262	28.465	5.06429	0.399705	217.765
1442	SAP	Ku	1202	24	1	0.552863	1112.53	20.288	0.969758	497.451	9.07152	0.433614	217.716
1443	SAP	Ku_C	1202	24	1	0.552863	1112.53	20.288	0.969758	497.451	9.07152	0.433614	217.716
1444	SAP	Ku_N	1202	24	1	0.552863	1112.53	20.288	0.969758	497.451	9.07152	0.433614	217.716
1445	Bromodomain	TIP49	2795	55	0	0.503329	507.928	7.96329	0.877338	252.273	3.95513	0.435749	217.532
1446	WD40	HDAC_interact	906	73	0	0.741935	271.572	11.5426	0.955938	70.0832	2.97874	0.246694	217.448
1447	WD40	C1_1	4889	256	0	0.531108	157.891	1.81143	1	74.0339	0.849366	0.468892	217.438
1448	CH	PBD	344	34	0	0.515152	255.599	13.1827	0.999737	123.927	6.39163	0.484721	217.315
1449	Pkinase	Tau95	1123	87	0	0.688716	39.7103	8.02222	1	12.3612	2.49719	0.311284	217.255
1450	BTB	SNF2_N	1846	189	1	0.610577	68.4083	2.95144	1	26.6398	1.14936	0.389423	217.228
1451	GATA	SWIRM	1989	25	0	0.437011	1047.05	15.4267	1	589.478	8.68505	0.562989	217.126
1452	WD40	Topoisom_I_N	4158	173	0	0.404467	194.684	2.10602	0.975757	115.941	1.25421	0.581096	216.978
1453	WD40	Topoisom_I	4158	173	0	0.404467	194.684	2.10602	0.975757	115.941	1.25421	0.581096	216.978
1454	WD40	PD40	84	15	0	0.587302	110.68	35.0021	0.995065	45.6775	14.4453	0.410662	216.679
1455	FKBP_C	Helicase_C	4349	174	0	0.731343	453.633	4.62974	1	121.872	1.24381	0.268657	216.423
1456	DEAD	PPP4R2	70	16	0	0.741935	454.04	52.3832	0.906351	117.172	13.5182	0.233897	216.292
1457	SNF2_N	HSA	2268	68	0	0.468263	161.668	5.96114	0.929786	85.9647	3.16976	0.494401	215.543
1458	Helicase_C	PCI	6159	548	0	0.752809	34.8011	1.59003	1	8.60253	0.39304	0.247191	215.386
1459	RhoGAP	SNF2_N	3534	173	0	0.386218	301.189	2.02594	1	184.865	1.24349	0.613782	215.123
1460	Helicase_C	Cse1	7376	185	0	0.491954	221.677	2.28805	0.989917	112.622	1.16243	0.502923	215.05
1461	HEAT	WW	2542	82	0	0.384615	1012.98	4.25982	0.998374	623.374	2.62142	0.614384	214.957
1462	DEAD	ROKNT	10053	59	0	0.192845	2499.27	4.50969	0.830589	2017.3	3.64002	0.670414	214.761
1463	Myb_DNA-binding	Myb_DNA-bind_2	142	8	0	0.395833	1030.22	44.408	0.993671	622.424	26.8298	0.600343	214.639
1464	PHD	CPSF_A	2274	59	0	0.405224	241.315	6.10846	0.909599	143.528	3.63316	0.541007	214.357
1465	DEAD	K_tetra	2230	186	0	0.875	302.275	9.21944	1	37.7844	1.15243	0.125	214.352
1466	AAA	BRK	5396	117	0	0.386364	293.223	2.97677	1	179.932	1.82666	0.613636	213.719
1467	Helicase_C	Nol1_Nop2_Fmu	5540	215	1	0.524528	227.739	2.08927	1	108.284	0.993389	0.475472	213.579
1468	LRR_1	SMC_hinge	1428	95	0	0.634877	164.423	6.14956	0.999418	60.0347	2.24534	0.36491	213.308
1469	ArfGap	DEAD	5636	309	0	0.661017	72.7044	2.03523	1	24.6456	0.689909	0.338983	213.182
1470	PI3_PI4_kinase	PWWP	584	28	0	0.631382	924.791	20.6418	0.91382	340.894	7.60894	0.33685	213.05
1471	Bromodomain	SWIB	717	42	1	0.507692	251.209	10.2962	0.95083	123.672	5.06892	0.468101	212.895
1472	WW	P68HR	1010	17	0	0.395048	1942.58	20.671	0.604277	1175.16	12.505	0.365559	212.584
1473	Ank	Myb_DNA-binding	2315	229	0	0.753998	194.479	3.76824	1	47.8423	0.926996	0.246002	212.282
1474	SAP	SNF2_N	5654	198	0	0.459266	181.444	1.97667	0.990072	98.1128	1.06885	0.535366	211.633
1475	Pkinase	U-box	1454	129	0	0.714286	101.153	5.74149	1	28.9009	1.64043	0.285714	211.615
1476	HEAT	ubiquitin	1919	125	0	0.614213	224.71	4.3833	1	86.6902	1.69102	0.385787	211.377
1477	PHD	FH2	1913	112	0	0.608833	110.426	4.82124	0.999941	43.1952	1.88591	0.391144	211.222
1478	ARID	GATA	900	73	0	0.483871	57.144	5.60283	0.997979	29.4937	2.89179	0.515086	211.1
1479	DEAD	HSA	8053	154	0	0.381818	340.195	2.21116	0.999649	210.302	1.3669	0.617965	210.502
1480	Helicase_C	ADH_zinc_N	6960	160	1	0.446843	373.76	2.37509	1	206.748	1.3138	0.553157	210.208
1481	WD40	ORC2	28	8	0	0.619048	178.627	68.7111	1	68.0482	26.1756	0.380952	209.405
1482	2-oxoacid_dh	Transket_pyr	939	16	1	0.430025	1488.59	22.9362	0.913551	848.457	13.0731	0.520701	209.169
1483	Helicase_C	2-Hacid_dh_C	5977	156	1	0.460251	223.885	2.48131	0.999551	120.842	1.33929	0.539507	208.929
1484	Helicase_C	2-Hacid_dh	5977	156	1	0.460251	223.885	2.48131	0.999551	120.842	1.33929	0.539507	208.929
1485	RRM_1	Pro_isomerase	10420	449	1	0.606178	158.934	1.18077	1	62.5917	0.465015	0.393822	208.792
1486	DEAD	Hist_deacetyl	11001	180	0	0.349436	442.757	1.78203	1	288.042	1.15932	0.650564	208.678
1487	WD40	RasGAP_C	3855	155	0	0.577488	155.717	3.17572	0.999302	65.7922	1.34178	0.422217	207.976
1488	DEAD	NOP5NT	7566	103	0	0.389068	233.421	3.30133	1	142.604	2.01689	0.610932	207.74
1489	WD40	PWWP	4369	291	0	0.583333	72.3122	1.71202	1	30.1301	0.713344	0.416667	207.583
1490	DEAD	RNA_pol_Rpb1_5	5939	125	0	0.421115	557.204	2.86701	1	322.557	1.65967	0.578885	207.458
1491	DEAD	RNA_pol_Rpb1_1	5939	125	0	0.421115	557.204	2.86701	1	322.557	1.65967	0.578885	207.458
1492	DEAD	RNA_pol_Rpb1_2	5939	125	0	0.421115	557.204	2.86701	1	322.557	1.65967	0.578885	207.458
1493	DEAD	RNA_pol_Rpb1_3	5939	125	0	0.421115	557.204	2.86701	1	322.557	1.65967	0.578885	207.458
1494	DEAD	RNA_pol_Rpb1_4	5939	125	0	0.421115	557.204	2.86701	1	322.557	1.65967	0.578885	207.458
1495	HLH	RRM_1	3476	429	0	0.798742	46.0021	2.40265	0.999827	9.25828	0.483552	0.201223	207.444
1496	AAA	Septin	9975	183	1	0.341886	487.32	1.72122	0.997801	320.712	1.13276	0.656667	207.295
1497	LIM	PDZ	832	107	1	0.730159	76.7699	7.17194	1	20.7157	1.93528	0.269841	207.075
1498	PHD	Sds3	210	32	0	0.3	61.8752	9.23285	1	43.3126	6.46299	0.7	206.816
1499	BAH	PWWP	1085	41	0	0.460177	307.033	9.33806	0.996616	165.743	5.0409	0.537996	206.677
1500	WD40	PID	1748	234	0	0.801047	84.865	4.43574	0.999993	16.8841	0.882503	0.198952	206.506
1501	Pkinase	Tfb2	233	32	0	0.684211	73.8753	20.434	1	23.3291	6.45283	0.315789	206.491
1502	AAA	dsrm	4523	142	0	0.466003	340.541	2.71295	1	181.848	1.4487	0.533997	205.716
1503	Helicase_C	Xpo1	7415	208	0	0.407906	311.468	1.66687	1	184.419	0.986945	0.592094	205.285
1504	CH	Myb_DNA-binding	3032	190	0	0.452155	191.307	1.96926	1	104.807	1.07885	0.547845	204.982
1505	Ank	FHA	1325	142	0	0.6	211.511	3.60858	1	84.6043	1.44343	0.4	204.967
1506	Myb_DNA-binding	CHDNT	1047	35	0	0.58011	328.451	13.9254	0.920435	137.913	5.84714	0.386481	204.65
1507	Myb_DNA-binding	CHDCT2	1047	35	0	0.58011	328.451	13.9254	0.920435	137.913	5.84714	0.386481	204.65
1508	Myb_DNA-binding	DUF1086	1047	35	0	0.58011	328.451	13.9254	0.920435	137.913	5.84714	0.386481	204.65
1509	Myb_DNA-binding	DUF1087	1047	35	0	0.58011	328.451	13.9254	0.920435	137.913	5.84714	0.386481	204.65
1510	ARID	FATC	281	22	0	0.605307	117.506	23.5621	0.997232	46.3789	9.29981	0.393601	204.596
1511	RhoGEF	GIT_SHD	160	12	0	0.218391	728.653	21.8046	0.913261	569.522	17.0427	0.713813	204.512
1512	WD40	cwf21	2748	155	0	0.639752	72.4496	3.66181	0.99998	26.0999	1.31916	0.360241	204.47
1513	RRM_1	SWIB	4685	307	0	0.73913	40.6449	2.54758	1	10.603	0.664587	0.26087	204.028
1514	FAT	DEAD	7088	153	0	0.469681	507.672	2.51426	0.989818	269.228	1.33336	0.524919	204.004
1515	RRM_1	PFK	7676	257	0	0.562141	143.513	1.80726	1	62.8383	0.791325	0.437859	203.37
1516	RRM_1	E3_binding	7791	247	0	0.665844	362.289	2.46247	0.989342	121.061	0.822852	0.330595	203.244
1517	W2	Kinesin	1335	63	0	0.461187	160.54	5.95219	0.985624	86.5009	3.20712	0.531067	202.048
1518	SNF2_N	GTF2I	2887	42	0	0.463542	687.198	8.96104	0.994729	368.653	4.80723	0.533631	201.904
1519	Helicase_C	NTF2	3267	168	0	0.717172	275.738	4.22896	0.998995	77.9865	1.19607	0.282544	200.94
1520	Pkinase	AhpC-TSA	4175	350	1	0.646259	73.9012	1.62076	0.999532	26.1419	0.573332	0.353576	200.666
1521	Pkinase	1-cysPrx_C	4175	350	0	0.646259	73.9012	1.62076	0.999532	26.1419	0.573332	0.353576	200.666
1522	WD40	PABP	3499	261	0	0.654428	62.2017	2.22224	0.999999	21.4952	0.767945	0.345572	200.434
1523	Pkinase	Arm	2196	227	1	0.544858	92.205	1.93396	1	41.9664	0.880226	0.455142	199.811
1524	RRM_1	WGR	13022	124	0	0.274713	857.767	2.21656	0.944911	622.128	1.60764	0.685332	199.348
1525	RRM_1	PADR1	13022	124	0	0.274713	857.767	2.21656	0.944911	622.128	1.60764	0.685332	199.348
1526	RRM_1	PARP_reg	13022	124	0	0.274713	857.767	2.21656	0.944911	622.128	1.60764	0.685332	199.348
1527	KH_1	WW	3603	104	0	0.344017	922.927	2.91509	0.995526	605.424	1.91225	0.653048	198.874
1528	PHD	SAM_1	972	127	0	0.627119	49.421	4.19345	0.996299	18.4282	1.56366	0.371501	198.585
1529	AAA	UBX	672	67	1	0.8	806.989	14.8077	1	161.398	2.96155	0.2	198.424
1530	PH	zf-B_box	1757	151	0	0.471441	182.322	2.47946	1	96.3678	1.31054	0.528559	197.892
1531	RhoGEF	KH_1	3213	179	0	0.472273	478.794	2.09292	1	252.672	1.10449	0.527727	197.703
1532	LRR_1	SMC_N	1397	88	0	0.634877	164.423	6.14956	0.999418	60.0347	2.24534	0.36491	197.59
1533	PID	Helicase_C	5130	409	0	0.705521	48.1283	1.64014	1	14.1727	0.482986	0.294479	197.541
1534	WH2	FragX_IP	33	6	0	0.384615	423.561	53.3946	1	260.653	32.8582	0.615385	197.149
1535	Helicase_C	UBA	7394	442	1	0.699422	267.595	1.48321	1	80.4331	0.445821	0.300578	197.053
1536	Pkinase	OTCace_N	634	69	1	0.734317	132.801	10.7337	0.999733	35.2829	2.85176	0.265612	196.772
1537	Pkinase	OTCace	634	69	1	0.734317	132.801	10.7337	0.999733	35.2829	2.85176	0.265612	196.772
1538	Chromo	BRK	1133	49	0	0.496561	153.231	7.96642	0.862053	77.1422	4.0106	0.433991	196.52
1539	WD40	FimP	46	9	0	0.6	363.212	54.5155	0.993621	145.285	21.8062	0.397448	196.256
1540	Helicase_C	CS	5484	227	0	0.560664	217.731	1.96743	0.999676	95.6569	0.864362	0.439193	196.21
1541	Kinesin	Rep_fac_C	4809	100	0	0.321817	555.452	2.88779	0.994789	376.698	1.95845	0.674649	195.845
1542	DEAD	MutS_II	8317	120	0	0.352423	561.09	2.51802	1	363.349	1.63061	0.647577	195.673
1543	DEAD	MutS_IV	8317	120	0	0.352423	561.09	2.51802	1	363.349	1.63061	0.647577	195.673
1544	DEAD	MutS_III	8317	120	0	0.352423	561.09	2.51802	1	363.349	1.63061	0.647577	195.673
1545	DEAD	MutS_V	8317	120	1	0.352423	561.09	2.51802	1	363.349	1.63061	0.647577	195.673
1546	PHD	SMC_N	3999	124	0	0.431373	227.247	2.77097	0.999988	129.219	1.57565	0.568621	195.38
1547	RFX_DNA_binding	PI3_PI4_kinase	418	21	0	0.605307	117.506	23.5621	0.997232	46.3789	9.29981	0.393601	195.296
1548	Ank	SPRY	1151	142	0	0.803922	47.9892	7.00408	1	9.40964	1.37335	0.196078	195.016
1549	SAP	BRCT	3410	101	0	0.394092	362.94	3.18522	1	219.908	1.92995	0.605908	194.925
1550	Helicase_C	RQC	3108	112	1	0.620767	428.862	4.57791	1	162.639	1.73609	0.379233	194.442
1551	DEAD	Hormone_recep	4757	276	0	0.588235	67.5832	1.70915	1	27.8284	0.703769	0.411765	194.24
1552	DEAD	zf-C4	4757	276	0	0.588235	67.5832	1.70915	1	27.8284	0.703769	0.411765	194.24
1553	Pkinase	BSD	143	24	0	0.661538	80.2415	23.9036	0.999593	27.1586	8.09045	0.338324	194.171
1554	Pkinase	TFIIH_BTF_p62_N	143	24	0	0.661538	80.2415	23.9036	0.999593	27.1586	8.09045	0.338324	194.171
1555	zf-RanBP	zf-RanBP	1181	24	1	0.373626	262.788	12.9094	0.996558	164.604	8.08613	0.624217	194.067
1556	Kinesin	SPOC	2157	79	0	0.382887	290.258	3.98006	1	179.122	2.45615	0.617113	194.036
1557	WD40	Pacs-1	237	31	0	0.428571	201.76	10.9462	0.976128	115.291	6.25495	0.557788	193.903
1558	MBD	Chromo	334	25	0	0.632768	239.257	21.1164	0.979076	87.8629	7.75461	0.359548	193.865
1559	Helicase_C	Proteasome_A_N	4448	333	0	0.696629	33.5076	1.91866	1	10.1652	0.582064	0.303371	193.827
1560	zf-C2H2	Hist_deacetyl	822	78	1	0.586614	264.56	6.00634	0.99977	109.365	2.48294	0.413291	193.669
1561	SAP	Myb_DNA-binding	3553	103	0	0.428571	277.765	3.29039	0.993708	158.723	1.88022	0.567833	193.663
1562	Spc97_Spc98	Tubulin_C	441	15	0	0.333333	501.655	19.3464	0.922151	334.437	12.8976	0.614767	193.464
1563	Spc97_Spc98	Tubulin	441	15	0	0.333333	501.655	19.3464	0.922151	334.437	12.8976	0.614767	193.464
1564	SMC_hinge	STAG	131	10	0	0.684211	1952.47	61.2535	0.858074	616.57	19.3432	0.270971	193.432
1565	Chromo	DUF1087	500	26	0	0.591603	186.232	18.1883	0.873012	76.0567	7.42806	0.356535	193.13
1566	Chromo	DUF1086	500	26	0	0.591603	186.232	18.1883	0.873012	76.0567	7.42806	0.356535	193.13
1567	Chromo	CHDCT2	500	26	0	0.591603	186.232	18.1883	0.873012	76.0567	7.42806	0.356535	193.13
1568	Chromo	CHDNT	500	26	0	0.591603	186.232	18.1883	0.873012	76.0567	7.42806	0.356535	193.13
1569	DEAD	Nucleoplasmin	8185	60	0	0.289575	1025.26	4.52734	0.937394	728.367	3.21633	0.665948	192.98
1570	Pkinase	PFK	2052	180	1	0.684764	52.7545	3.39222	0.999771	16.6302	1.06935	0.315164	192.483
1571	DEAD	MA3	5521	179	1	0.477352	252.965	2.05733	1	132.212	1.07526	0.522648	192.471
1572	Pkinase	PID	1480	215	0	0.602273	31.5415	2.24912	1	12.5449	0.894538	0.397727	192.326
1573	Pkinase	Cyclin_C	249	37	1	0.625	142.779	13.844	0.998269	53.5423	5.19151	0.374351	192.086
1574	HA2	zf-RanBP	1752	62	0	0.577465	315.125	7.31915	0.983823	133.151	3.0926	0.4157	191.741
1575	DUF1605	zf-RanBP	1752	62	0	0.577465	315.125	7.31915	0.983823	133.151	3.0926	0.4157	191.741
1576	HEAT	IQ	1992	73	0	0.384615	1012.98	4.25982	1	623.374	2.62142	0.615385	191.364
1577	Helicase_C	TFIIS_M	8141	125	0	0.370124	628.704	2.42907	0.997949	396.005	1.53001	0.628584	191.252
1578	FATC	Myb_DNA-binding	1044	31	0	0.531429	204.399	13.1489	0.991646	95.7755	6.16118	0.464657	190.997
1579	Helicase_C	E3_binding	6526	169	0	0.668508	663.54	3.40826	0.999852	219.958	1.12981	0.331443	190.938
1580	DEAD	MutS_I	8308	117	1	0.352423	561.09	2.51802	1	363.349	1.63061	0.647577	190.781
1581	FKBP_C	FH2	340	16	0	0.657143	799.23	34.7777	0.999754	274.022	11.9238	0.342773	190.781
1582	Pkinase	Ldh_1_C	2196	207	1	0.703947	73.5192	3.10667	0.993399	21.7656	0.919738	0.294098	190.386
1583	Pkinase	Ldh_1_N	2196	207	1	0.703947	73.5192	3.10667	0.993399	21.7656	0.919738	0.294098	190.386
1584	RRM_1	DUF1726	7743	109	0	0.464226	648.376	3.25525	1	347.383	1.74408	0.535774	190.105
1585	RRM_1	DUF699	7743	109	0	0.464226	648.376	3.25525	1	347.383	1.74408	0.535774	190.105
1586	PH	2OG-FeII_Oxy	763	82	0	0.642023	105.54	6.47276	1	37.7809	2.3171	0.357977	190.002
1587	ARID	Sds3	89	9	0	0.238095	303.268	27.6559	0.991339	231.062	21.0711	0.755306	189.64
1588	Gelsolin	Gelsolin	76	16	1	0.5	284.451	23.6899	0.960419	142.226	11.8449	0.48021	189.519
1589	PDZ	BRCT	1247	123	0	0.81457	206.447	8.29691	0.999962	38.2816	1.5385	0.185423	189.235
1590	WD40	Drf_DAD	2739	176	0	0.644444	94.2653	3.01639	1	33.5165	1.0725	0.355556	188.759
1591	RRM_1	MAD	10104	117	0	0.346218	610.658	2.4657	0.989382	399.238	1.61203	0.646841	188.607
1592	CH	BRCT	2987	161	0	0.35015	553.395	1.80249	1	359.624	1.17135	0.64985	188.587
1593	UCH	DUSP	20	8	0	0.411765	361.797	40.0085	0.928571	212.822	23.5344	0.546218	188.275
1594	BAH	BAH	707	24	1	0.516888	314.901	16.237	0.999311	152.132	7.84426	0.482779	188.262
1595	Spc97_Spc98	Spc97_Spc98	290	10	0	0.264706	1365.64	25.5748	0.968788	1004.15	18.805	0.712344	188.05
1596	DEAD	CPSF_A	8777	103	0	0.360041	884.205	2.84637	0.999958	565.855	1.82156	0.639932	187.621
1597	PHD	RNA_pol_Rpb1_5	1690	75	0	0.511664	150.91	5.12103	1	73.695	2.50078	0.488336	187.559
1598	PHD	RNA_pol_Rpb1_3	1690	75	0	0.511664	150.91	5.12103	1	73.695	2.50078	0.488336	187.559
1599	PHD	RNA_pol_Rpb1_4	1690	75	0	0.511664	150.91	5.12103	1	73.695	2.50078	0.488336	187.559
1600	PHD	RNA_pol_Rpb1_1	1690	75	0	0.511664	150.91	5.12103	1	73.695	2.50078	0.488336	187.559
1601	PHD	RNA_pol_Rpb1_2	1690	75	0	0.511664	150.91	5.12103	1	73.695	2.50078	0.488336	187.559
1602	FHA	HATPase_c	2148	65	0	0.428354	2320.79	5.04516	0.999994	1326.67	2.88405	0.571643	187.463
1603	PH	IQ	1036	76	1	0.434963	248.718	4.35494	0.999974	140.535	2.46071	0.565023	187.014
1604	RRM_1	3_5_exonuc	7686	127	0	0.406227	553.687	2.47633	1	328.764	1.47038	0.593773	186.738
1605	DEAD	Drf_FH3	6967	201	0	0.568998	151.224	2.15456	1	65.1777	0.928619	0.431002	186.652
1606	DEAD	Drf_GBD	6967	201	0	0.568998	151.224	2.15456	1	65.1777	0.928619	0.431002	186.652
1607	Helicase_C	Transket_pyr	8016	221	1	0.537248	195.962	1.825	1	90.6816	0.844522	0.462752	186.639
1608	GTP_EFTU	PWI	771	28	0	0.402678	193.994	11.1351	0.975417	115.877	6.65123	0.582639	186.235
1609	SNF2_N	TIP49	4817	50	0	0.491456	548.217	7.32212	0.959139	278.793	3.72362	0.487764	186.181
1610	Pkinase	zf-UBR	687	81	1	0.766234	308.184	9.83118	0.998088	72.0431	2.2982	0.233319	186.154
1611	WD40	53-BP1_Tudor	1517	83	0	0.642308	157.614	6.26785	0.998221	56.3773	2.24196	0.357056	186.083
1612	PHD	UCH	1128	117	0	0.674877	49.1939	4.87988	0.999961	15.9941	1.58656	0.32511	185.628
1613	RRM_1	Transketolase_C	7638	192	0	0.492286	162.199	1.90359	0.986241	82.3509	0.966482	0.500728	185.564
1614	Helicase_C	RFC1	7824	79	0	0.312634	687.775	3.41377	0.987764	472.753	2.34651	0.678956	185.375
1615	VPS9	Helicase_C	4193	149	0	0.639413	78.1822	3.44886	0.999334	28.1915	1.24361	0.360347	185.298
1616	FHA	FHA	490	36	1	0.52	112.639	10.7176	0.998924	54.0668	5.14445	0.479483	185.2
1617	PHD	Drf_FH3	1823	98	0	0.608833	110.426	4.82124	0.999941	43.1952	1.88591	0.391144	184.819
1618	PHD	Drf_GBD	1823	98	0	0.608833	110.426	4.82124	0.999941	43.1952	1.88591	0.391144	184.819
1619	Helicase_C	RED_N	429	35	0	0.673077	293.392	16.1251	0.934389	95.9168	5.27165	0.305473	184.508
1620	Helicase_C	RED_C	429	35	0	0.673077	293.392	16.1251	0.934389	95.9168	5.27165	0.305473	184.508
1621	WD40	zf-RNPHF	6179	278	0	0.485968	113.031	1.2907	1	58.1015	0.66346	0.514032	184.442
1622	Adaptin_N	SNF2_N	1731	142	0	0.675325	68.7144	3.99698	0.999848	22.3099	1.29772	0.324626	184.276
1623	PHD	RFX_DNA_binding	1714	90	0	0.577093	63.8431	4.8339	1	26.9997	2.04429	0.422907	183.986
1624	WD40	BP28CT	746	55	0	0.655172	53.4376	9.69618	0.999873	18.4267	3.34351	0.344784	183.893
1625	ubiquitin	UBA	580	53	1	0.655172	1687.39	10.0478	0.999995	581.86	3.46476	0.344826	183.632
1626	Homeobox	RRM_1	5336	578	1	0.803922	162.082	1.61911	1	31.7808	0.317472	0.196078	183.499
1627	SNF2_N	PWWP	2635	104	0	0.402381	158.539	2.94282	0.998471	94.746	1.75868	0.596705	182.903
1628	Pkinase	NOSIC	2333	212	1	0.681004	40.596	2.70409	1	12.95	0.862595	0.318996	182.87
1629	Pkinase	Nop	2333	212	1	0.681004	40.596	2.70409	1	12.95	0.862595	0.318996	182.87
1630	WD40	PC_rep	788	89	1	0.733333	14.5562	7.70285	0.999338	3.88164	2.05409	0.26649	182.814
1631	HMG_box	Ku	1408	37	0	0.505798	149.203	9.99465	0.998305	73.7366	4.93937	0.493364	182.757
1632	HMG_box	Ku_C	1408	37	0	0.505798	149.203	9.99465	0.998305	73.7366	4.93937	0.493364	182.757
1633	HMG_box	Ku_N	1408	37	0	0.505798	149.203	9.99465	0.998305	73.7366	4.93937	0.493364	182.757
1634	AAA	2-oxoacid_dh	3693	102	0	0.67624	690.518	5.53	0.999959	223.562	1.79039	0.323747	182.62
1635	UME	RRM_1	1188	66	0	0.804598	49.1961	14.154	0.994039	9.61304	2.76572	0.194238	182.537
1636	PI3_PI4_kinase	Ku_PK_bind	227	7	0	0.574661	2604.69	61.2559	0.984554	1107.88	26.0545	0.418769	182.382
1637	Helicase_C	MAD	9164	81	0	0.325316	939.657	3.33586	0.993609	633.972	2.25065	0.670372	182.303
1638	Kinesin	GTF2I	2237	50	0	0.316085	1213.71	5.32744	0.983496	830.072	3.64352	0.672627	182.176
1639	PHD	IBN_N	3936	206	0	0.435337	197.602	1.56512	1	111.579	0.883767	0.564663	182.056
1640	PHD	GTP_EFTU	2301	118	0	0.443532	188.061	2.77236	0.999991	104.65	1.54273	0.556463	182.042
1641	WD40	Nucleoplasmin	4490	131	0	0.498611	282.485	2.76875	0.999902	141.635	1.38822	0.50134	181.857
1642	WD40	Aminotran_5	506	70	0	0.766423	35.311	11.1134	0.99989	8.24781	2.59583	0.233551	181.708
1643	SET	zf-C2H2	277	43	1	0.652174	163.984	12.1383	1	57.0381	4.22202	0.347826	181.547
1644	Histone	Ku_N	1248	37	1	0.56015	284.175	11.1528	0.997474	124.994	4.90557	0.438739	181.506
1645	Histone	Ku_C	1248	37	1	0.56015	284.175	11.1528	0.997474	124.994	4.90557	0.438739	181.506
1646	Histone	Ku	1248	37	1	0.56015	284.175	11.1528	0.997474	124.994	4.90557	0.438739	181.506
1647	PI3_PI4_kinase	Linker_histone	788	32	0	0.598071	217.011	14.1059	0.858077	87.2232	5.66959	0.344886	181.427
1648	WD40	Ndr	3679	148	0	0.574194	170.433	2.87499	0.99964	72.5715	1.22419	0.425653	181.18
1649	Helicase_C	KOW	1639	172	0	0.771429	60.1418	4.60698	0.999424	13.7467	1.05302	0.22844	181.12
1650	RRM_1	PCMT	10227	278	0	0.580265	194.456	1.55129	0.997076	81.6199	0.65113	0.418508	181.014
1651	DEAD	2-oxoacid_dh	7058	160	0	0.668508	663.54	3.40826	0.999852	219.958	1.12981	0.331443	180.769
1652	ThiF	RRM_1	5949	198	0	0.553746	123.921	2.04209	1	55.3003	0.911292	0.446254	180.436
1653	Bromodomain	HSA	1224	56	1	0.459916	348.108	5.96114	0.899905	188.008	3.21952	0.486025	180.293
1654	Bromodomain	zf-B_box	2296	111	1	0.438202	163.478	2.88457	0.999898	91.8413	1.62054	0.56174	179.881
1655	DEAD	Med26	5385	131	0	0.502098	108.865	2.75732	0.997584	54.2041	1.37288	0.496699	179.847
1656	Helicase_C	BCL_N	1000	102	0	0.551724	56.9809	3.93242	1	25.5432	1.76281	0.448276	179.806
1657	KH_1	Bromodomain	5018	208	0	0.475692	254.051	1.64832	1	133.201	0.864228	0.524308	179.759
1658	AAA	Proteasome	4242	287	1	0.663717	29.2213	1.85349	1	9.82662	0.623298	0.336283	178.886
1659	Helicase_C	Rad50_zn_hook	5835	73	0	0.417219	285.773	4.2035	0.996932	166.543	2.44972	0.580993	178.83
1660	WD40	MutS_V	4193	204	0	0.583333	71.1628	2.10204	1	29.6512	0.875851	0.416667	178.674
1661	WD40	MutS_I	4193	204	0	0.583333	71.1628	2.10204	1	29.6512	0.875851	0.416667	178.674
1662	WD40	MutS_IV	4193	204	0	0.583333	71.1628	2.10204	1	29.6512	0.875851	0.416667	178.674
1663	WD40	MutS_II	4193	204	0	0.583333	71.1628	2.10204	1	29.6512	0.875851	0.416667	178.674
1664	WD40	MutS_III	4193	204	0	0.583333	71.1628	2.10204	1	29.6512	0.875851	0.416667	178.674
1665	Helicase_C	C1_4	472	62	0	0.666667	23.2644	8.63074	0.993887	7.75479	2.87691	0.331296	178.369
1666	AAA	Pkinase_C	1671	153	0	0.729032	388.844	4.29373	0.998475	105.364	1.16346	0.270554	178.01
1667	Arm	Helicase_C	8838	379	1	0.502058	104.028	0.943034	1	51.7998	0.469577	0.497942	177.97
1668	WD40	GUCT	5395	204	0	0.476015	149.236	1.65799	0.999999	78.1977	0.868762	0.523985	177.227
1669	DEAD	Ras	9635	599	1	0.683891	85.3751	0.934686	0.999939	26.9879	0.295463	0.31609	176.982
1670	14-3-3	DEAD	17961	291	0	0.495208	209.512	1.20476	0.999304	105.76	0.608151	0.504441	176.972
1671	WD40	MBD	979	108	0	0.76431	171.133	6.94794	1	40.3344	1.63756	0.23569	176.857
1672	Pribosyltran	RRM_1	1165	205	0	0.7	37.5373	2.87404	1	11.2612	0.862211	0.3	176.753
1673	AAA	UCH	2464	233	1	0.689655	119.903	2.44172	0.99788	37.2113	0.757775	0.309687	176.562
1674	Helicase_C	CDC48_N	2078	86	0	0.745133	382.994	8.0552	0.999109	97.6127	2.05301	0.25464	176.559
1675	Helicase_C	CDC48_2	2078	86	0	0.745133	382.994	8.0552	0.999109	97.6127	2.05301	0.25464	176.559
1676	HSA	SWIRM	981	12	0	0.351159	1574.64	22.6545	0.900548	1021.69	14.6992	0.584313	176.39
1677	DEAD	W2	5252	164	0	0.477352	252.965	2.05733	1	132.212	1.07526	0.522648	176.342
1678	FERM_N	DEAD	4707	229	0	0.654867	118.88	2.22985	1	41.0294	0.769595	0.345133	176.237
1679	GTP_EFTU	Sec63	563	10	0	0.302152	1871.84	25.2185	0.957013	1306.26	17.5987	0.66785	175.987
1680	Pkinase	SPRY	2904	350	1	0.708333	79.3494	1.71767	1	23.1436	0.500987	0.291667	175.345
1681	AKAP95	RRM_1	5276	258	0	0.671429	52.1357	2.06531	0.999645	17.1303	0.678601	0.328455	175.079
1682	FAT	PWWP	559	23	0	0.631382	924.791	20.6418	0.908964	340.894	7.60894	0.33506	175.006
1683	FATC	DEAD	5484	131	0	0.469681	507.672	2.51426	0.989818	269.228	1.33336	0.524919	174.67
1684	AAA	DTHCT	9382	75	0	0.296069	1207.11	3.30362	0.999449	849.725	2.32552	0.703544	174.414
1685	AAA	DNA_topoisoIV	9382	75	1	0.296069	1207.11	3.30362	0.999449	849.725	2.32552	0.703544	174.414
1686	AAA	DNA_gyraseB	9382	75	0	0.296069	1207.11	3.30362	0.999449	849.725	2.32552	0.703544	174.414
1687	Myb_DNA-binding	zf-B_box	2592	97	0	0.411236	203.344	3.0495	0.999999	119.721	1.79544	0.588764	174.157
1688	RhoGAP	DNA_topoisoIV	1944	62	0	0.351643	1535.61	4.33104	0.999921	995.624	2.80806	0.648305	174.1
1689	RhoGAP	DTHCT	1944	62	0	0.351643	1535.61	4.33104	0.999921	995.624	2.80806	0.648305	174.1
1690	RhoGAP	DNA_gyraseB	1944	62	0	0.351643	1535.61	4.33104	0.999921	995.624	2.80806	0.648305	174.1
1691	SMC_N	STAG	126	9	0	0.684211	1952.47	61.2535	0.858074	616.57	19.3432	0.270971	174.089
1692	DUF1605	PABP	654	31	0	0.592417	481.018	13.7047	0.99992	196.055	5.58579	0.40755	173.159
1693	HA2	PABP	654	31	0	0.592417	481.018	13.7047	0.99992	196.055	5.58579	0.40755	173.159
1694	Bromodomain	SPRY	1705	129	0	0.6417	218.012	3.74358	0.999987	78.1136	1.34132	0.358295	173.031
1695	HEAT	RasGAP	2441	66	0	0.384615	1012.98	4.25982	0.970725	623.374	2.62142	0.597369	173.014
1696	HEAT	RhoGAP	2560	125	0	0.380518	502.013	2.23205	0.998604	310.988	1.38271	0.618618	172.839
1697	Mov34	KOW	129	19	0	0.8	137.563	45.4189	0.999682	27.5126	9.08378	0.199936	172.592
1698	HEAT	RNA_pol_Rpb1_4	1008	40	0	0.588621	116.886	10.4771	0.999292	48.0844	4.31006	0.411087	172.403
1699	HEAT	RNA_pol_Rpb1_3	1008	40	0	0.588621	116.886	10.4771	0.999292	48.0844	4.31006	0.411087	172.403
1700	HEAT	RNA_pol_Rpb1_2	1008	40	0	0.588621	116.886	10.4771	0.999292	48.0844	4.31006	0.411087	172.403
1701	HEAT	RNA_pol_Rpb1_1	1008	40	0	0.588621	116.886	10.4771	0.999292	48.0844	4.31006	0.411087	172.403
1702	HEAT	RNA_pol_Rpb1_5	1008	40	0	0.588621	116.886	10.4771	0.999292	48.0844	4.31006	0.411087	172.403
1703	PCI	eIF3_N	68	8	0	0.594203	226.04	53.0806	0.996096	91.7262	21.5399	0.404213	172.32
1704	Mov34	eIF2A	210	16	0	0.677686	156.285	33.391	0.994218	50.373	10.7624	0.32045	172.198
1705	SAP	G-patch	1447	93	0	0.627119	81.2559	4.95771	0.999708	30.2988	1.84864	0.372773	171.923
1706	Bromodomain	JmjN	221	33	0	0.777778	698.506	23.4428	0.997193	155.224	5.20952	0.221598	171.914
1707	AAA	CS	2466	107	0	0.3	152.917	2.29191	0.99788	107.042	1.60434	0.698516	171.664
1708	WD40	UQ_con	2046	239	1	0.712766	38.544	2.50045	1	11.0712	0.718215	0.287234	171.653
1709	PID	RRM_1	5560	526	0	0.743017	59.8048	1.26798	1	15.3688	0.325849	0.256983	171.397
1710	AAA	S_100	1757	146	0	0.769231	40.5714	5.08411	1	9.36263	1.17326	0.230769	171.296
1711	RRM_1	CAF1	3575	201	1	0.69337	62.1044	2.77824	0.999988	19.0431	0.851892	0.306626	171.23
1712	DEAD	B-block_TFIIIC	3694	52	0	0.50173	271.371	6.60331	0.98882	135.216	3.29023	0.492699	171.092
1713	HMG_box	TPR_1	1458	150	0	0.707317	52.0111	3.88977	0.999901	15.2228	1.13847	0.292654	170.77
1714	PHD	RBB1NT	194	27	0	0.28	69.1237	8.77607	0.957474	49.769	6.31877	0.689381	170.607
1715	WD40	BDHCT	1077	63	0	0.653277	129.556	7.79459	1	44.9201	2.70256	0.346723	170.262
1716	Myb_DNA-binding	Prp19	872	13	0	0.467412	1216.82	24.5698	1	648.066	13.0856	0.532588	170.113
1717	Helicase_C	zf-RNPHF	13842	219	0	0.439904	161.781	1.37862	1	90.6131	0.77216	0.560096	169.103
1718	Bromodomain	Chromo	2094	114	0	0.496561	153.231	2.94282	1	77.1422	1.48153	0.503439	168.894
1719	Pkinase	ECH	217	49	0	0.756098	82.0225	14.1262	0.999973	20.0055	3.44541	0.243896	168.825
1720	Pkinase	Prp19	1376	110	0	0.732771	101.153	5.74149	1	27.0311	1.53429	0.267229	168.772
1721	AAA	Pro_isomerase	3290	127	1	0.629322	136.282	3.57856	1	50.5166	1.32649	0.370678	168.465
1722	RhoGAP	BRCT	2169	91	0	0.273762	811.434	2.54533	1	589.294	1.84851	0.726238	168.215
1723	DEAD	PADR1	8910	57	0	0.256595	1860.39	3.96946	0.553136	1383.02	2.95092	0.411204	168.202
1724	DEAD	PARP_reg	8910	57	0	0.256595	1860.39	3.96946	0.553136	1383.02	2.95092	0.411204	168.202
1725	DEAD	WGR	8910	57	0	0.256595	1860.39	3.96946	0.553136	1383.02	2.95092	0.411204	168.202
1726	HEAT	Mov34	2105	97	0	0.539326	129.771	3.76094	0.983755	59.7821	1.73257	0.453191	168.059
1727	SNF2_N	RasGAP	2888	89	0	0.453287	205.48	3.44886	1	112.338	1.88553	0.546713	167.813
1728	GATA	JmjC	807	58	0	0.483871	73.9287	5.60283	1	38.1567	2.89179	0.516129	167.724
1729	HEAT	PWI	1482	64	0	0.501022	148.092	5.25176	0.982778	73.8947	2.62051	0.490384	167.713
1730	Arf	Helicase_C	6504	362	0	0.761468	42.1499	1.94172	1	10.0541	0.463163	0.238532	167.665
1731	Biotin_lipoyl	Kinesin	1556	88	0	0.680556	608.851	5.95712	1	194.494	1.90297	0.319444	167.461
1732	RFX_DNA_binding	FAT	408	18	0	0.605307	117.506	23.5621	0.997232	46.3789	9.29981	0.393601	167.397
1733	RhoGEF	Bromodomain	1629	126	1	0.464583	193.695	2.47946	1	103.708	1.32754	0.535417	167.271
1734	DEAD	Prp31_C	1489	42	0	0.546099	99.5798	8.77201	0.990072	45.1993	3.98162	0.449394	167.228
1735	Kinesin	BRK	2317	82	0	0.393571	311.186	3.36188	1	188.713	2.03874	0.606429	167.177
1736	FHA	DUF618	1328	57	0	0.607059	108.007	7.43072	0.996274	42.4403	2.91984	0.391477	166.431
1737	Pkinase	NAP	1143	150	1	0.725	35.1558	4.0297	1	9.66785	1.10817	0.275	166.225
1738	HEAT	Striatin	249	23	0	0.666667	224.108	21.6766	0.966707	74.7027	7.22554	0.322236	166.187
1739	Ank	RFX_DNA_binding	594	74	0	0.631902	129.76	6.09924	1	47.7645	2.24512	0.368098	166.139
1740	CH	SNF2_N	5066	319	0	0.453287	205.48	0.951083	1	112.338	0.519969	0.546713	165.87
1741	RRM_1	Ndr	10384	172	1	0.370621	429.09	1.531	0.983755	270.06	0.963579	0.619154	165.736
1742	Pkinase	BRK	3221	251	0	0.598309	72.9677	1.643	1	29.3105	0.659978	0.401691	165.655
1743	WD40	HAND	3318	167	0	0.558824	115.827	2.24655	1	51.1002	0.991126	0.441176	165.518
1744	WD40	SLIDE	3318	167	0	0.558824	115.827	2.24655	1	51.1002	0.991126	0.441176	165.518
1745	RRM_1	PMC2NT	7616	112	0	0.406227	553.687	2.47633	0.994904	328.764	1.47038	0.590747	164.682
1746	RRM_1	U-box	8663	249	0	0.479893	253.346	1.26933	1	131.767	0.660189	0.520107	164.387
1747	2-Hacid_dh	2-Hacid_dh_C	31	8	1	0.438596	440.594	36.5739	0.980459	247.351	20.5327	0.550433	164.262
1748	Pkinase	HA2	2959	274	0	0.672609	72.312	1.83057	0.999466	23.6743	0.599312	0.327216	164.212
1749	Pkinase	DUF1605	2959	274	0	0.672609	72.312	1.83057	0.999466	23.6743	0.599312	0.327216	164.212
1750	WD40	QLQ	3666	160	0	0.48289	104.174	1.98331	0.986716	53.8692	1.02559	0.510241	164.094
1751	Ank	ELM2	1356	139	0	0.686747	194.479	3.76824	1	60.9211	1.18041	0.313253	164.077
1752	Pkinase	FAT	2099	203	0	0.705298	116.753	2.7425	0.996211	34.4073	0.808219	0.293585	164.069
1753	Pkinase	PARP	3054	217	0	0.716522	66.4697	2.66531	0.999445	18.8427	0.755557	0.283321	163.956
1754	WH2	Nckap1	17	4	0	0.25	310.407	54.577	0.994005	232.805	40.9327	0.745504	163.731
1755	Metallophos	SMK-1	36	7	0	0.448276	228.229	42.3331	0.999952	125.919	23.3562	0.551697	163.493
1756	HMG_box	PAH	299	22	0	0.75641	356.015	30.5058	0.999631	86.7216	7.4309	0.2435	163.48
1757	Helicase_C	efhand	5662	423	1	0.692308	78.3094	1.25523	1	24.0952	0.386224	0.307692	163.373
1758	Mov34	Myb_DNA-binding	1635	63	1	0.467505	357.976	4.86799	0.992291	190.62	2.59218	0.52839	163.307
1759	SH3_1	CH	731	125	1	0.7	103.211	4.35395	1	30.9634	1.30618	0.3	163.273
1760	PHD	WW	3105	137	0	0.320513	341.01	1.75375	0.999839	231.712	1.19165	0.679378	163.256
1761	RRM_1	Prp31_C	2436	88	0	0.668966	52.354	5.59372	0.99087	17.331	1.85171	0.328012	162.951
1762	WD40	HECT	2691	249	1	0.705882	42.4301	2.22224	0.999999	12.4794	0.6536	0.294117	162.747
1763	Adaptin_N	Adaptin_N	292	37	1	0.623656	39.3247	11.6689	0.994465	14.7996	4.39151	0.374261	162.486
1764	Kinesin	HA2	2163	105	0	0.448718	271.575	2.80639	1	149.715	1.54711	0.551282	162.447
1765	Kinesin	DUF1605	2163	105	0	0.448718	271.575	2.80639	1	149.715	1.54711	0.551282	162.447
1766	Mov34	DUF1605	985	31	0	0.3925	1220.31	8.62392	0.997609	741.339	5.23903	0.606047	162.41
1767	Mov34	HA2	985	31	0	0.3925	1220.31	8.62392	0.997609	741.339	5.23903	0.606047	162.41
1768	Helicase_C	ECH	1405	204	0	0.728814	41.985	2.92801	0.998962	11.3858	0.794037	0.270905	161.984
1769	SPRY	HMG_box	1507	109	0	0.6417	95.6909	4.14669	0.999279	34.286	1.48576	0.358041	161.948
1770	ubiquitin	ubiquitin	448	33	1	0.668246	1687.39	14.7681	0.999995	559.799	4.89937	0.331752	161.679
1771	RRM_1	Not1	8901	112	0	0.390367	422.825	2.36623	0.99673	257.768	1.44253	0.60764	161.564
1772	HEAT	PWWP	1607	60	0	0.461369	327.166	4.99375	0.998778	176.222	2.68979	0.537973	161.387
1773	Pkinase	Drf_DAD	2344	178	0	0.533156	84.1444	1.94097	1	39.2822	0.906131	0.466844	161.291
1774	SNF2_N	zf-C4	1672	112	1	0.535714	94.8387	3.09674	0.999424	44.0322	1.43778	0.464018	161.031
1775	SNF2_N	Hormone_recep	1672	112	0	0.535714	94.8387	3.09674	0.999424	44.0322	1.43778	0.464018	161.031
1776	Homeobox	2-Hacid_dh	165	18	1	0.671642	147.816	27.2394	0.999806	48.5366	8.94428	0.328294	160.997
1777	Homeobox	2-Hacid_dh_C	165	18	1	0.671642	147.816	27.2394	0.999806	48.5366	8.94428	0.328294	160.997
1778	SET	2-Hacid_dh	188	21	0	0.703704	257.878	25.8717	0.996271	76.4084	7.66568	0.295191	160.979
1779	SET	2-Hacid_dh_C	188	21	0	0.703704	257.878	25.8717	0.996271	76.4084	7.66568	0.295191	160.979
1780	WD40	IKI3	56	13	0	0.6	382.007	30.9025	0.999995	152.803	12.361	0.399998	160.693
1781	RRM_1	Ran_BP1	6339	345	1	0.606178	158.934	1.18077	1	62.5917	0.465015	0.393822	160.43
1782	KH_1	Myb_DNA-binding	5747	139	0	0.38325	400.752	1.8698	0.999995	247.164	1.1532	0.616747	160.294
1783	WD40	Amino_oxidase	1863	90	0	0.649924	151.647	5.08706	0.947197	53.0879	1.78086	0.331591	160.277
1784	RhoGAP	Septin	2109	82	0	0.310902	801.531	2.83623	0.999919	552.334	1.95444	0.689042	160.264
1785	Ank	Pre-SET	155	21	1	0.44186	152.273	13.6534	0.996801	84.9895	7.62049	0.556354	160.03
1786	HMG_box	QLQ	1028	30	0	0.459916	550.771	9.87076	0.836679	297.463	5.33104	0.451877	159.931
1787	TPR_1	Myb_DNA-binding	1950	154	0	0.637199	165.46	2.86027	1	60.0293	1.03771	0.362801	159.807
1788	GTP_EFTU_D2	PWI	756	24	0	0.402678	193.994	11.1351	0.975417	115.877	6.65123	0.582639	159.63
1789	Bromodomain	zf-C3HC4	1273	119	1	0.6417	218.012	3.74358	0.999178	78.1136	1.34132	0.358005	159.617
1790	Pkinase	ADH_zinc_N	1947	146	1	0.61086	63.6878	2.80355	1	24.7835	1.09098	0.38914	159.282
1791	WD40	NOP5NT	4317	184	0	0.427259	171.438	1.51131	0.997006	98.1893	0.86559	0.571026	159.269
1792	PDZ	SH3_2	236	42	1	0.637427	423.712	10.4416	0.999827	153.626	3.78583	0.36251	159.005
1793	PH	Septin	2257	179	1	0.425623	326.357	1.54643	1	187.452	0.888232	0.574377	158.993
1794	PHD	Transket_pyr	1655	84	0	0.51619	157.888	3.912	0.99926	76.3879	1.89266	0.483452	158.984
1795	HEAT	UBA	1496	99	0	0.633898	224.71	4.3833	1	82.2668	1.60473	0.366102	158.869
1796	PI3_PI4_kinase	BRCT	1389	46	0	0.521064	592.318	7.20142	0.999056	283.682	3.44902	0.478484	158.655
1797	Homeobox	Chromo	428	54	0	0.722222	312.72	10.5687	1	86.8668	2.93574	0.277778	158.53
1798	Pkinase	RCC1	81	23	1	0.833333	475.05	41.3226	0.999834	79.175	6.88709	0.166639	158.403
1799	E1_dh	Transketolase_C	234	9	1	0.194444	448.493	21.8451	0.984302	361.286	17.5975	0.79291	158.377
1800	PHD	RNA_pol_Rpb2_5	814	52	0	0.596372	82.2155	7.53269	1	33.1845	3.0404	0.403628	158.101
1801	PHD	RNA_pol_Rpb2_6	814	52	0	0.596372	82.2155	7.53269	1	33.1845	3.0404	0.403628	158.101
1802	PHD	RNA_pol_Rpb2_7	814	52	0	0.596372	82.2155	7.53269	1	33.1845	3.0404	0.403628	158.101
1803	PHD	RNA_pol_Rpb2_1	814	52	0	0.596372	82.2155	7.53269	1	33.1845	3.0404	0.403628	158.101
1804	PHD	RNA_pol_Rpb2_2	814	52	0	0.596372	82.2155	7.53269	1	33.1845	3.0404	0.403628	158.101
1805	PHD	RNA_pol_Rpb2_3	814	52	0	0.596372	82.2155	7.53269	1	33.1845	3.0404	0.403628	158.101
1806	E3_binding	E1_dh	480	14	1	0.507692	1418.86	22.9362	0.997964	698.515	11.2917	0.491305	158.084
1807	Helicase_C	Pro_isomerase	8390	314	1	0.584416	170.617	1.21117	0.997885	70.9056	0.503341	0.414706	158.049
1808	PH	GTF2I	1240	82	0	0.492124	485.507	3.79475	1	246.578	1.92727	0.507876	158.036
1809	DEAD	TBC	3399	300	0	0.772152	65.462	2.31025	1	14.9154	0.526385	0.227848	157.915
1810	RhoGEF	CH	1677	146	1	0.434963	248.718	1.91339	1	140.535	1.08114	0.565037	157.846
1811	Helicase_C	Drf_DAD	7371	166	0	0.559033	151.224	2.15456	1	66.6847	0.95009	0.440967	157.715
1812	WD40	Ets	1330	155	0	0.818182	39.4813	5.59625	1	7.17841	1.0175	0.181818	157.713
1813	WD40	TFIID_30kDa	1657	79	1	0.590909	62.6554	4.87815	0.99485	25.6317	1.99561	0.406984	157.653
1814	Mov34	EFG_IV	496	8	0	0.338618	1695.03	29.7917	0.956804	1121.06	19.7037	0.632812	157.63
1815	Mov34	EFG_C	496	8	0	0.338618	1695.03	29.7917	0.956804	1121.06	19.7037	0.632812	157.63
1816	BTB	FHA	574	68	0	0.764454	89.7593	9.83599	0.999961	21.1424	2.31683	0.235537	157.544
1817	Pkinase	PCI	1604	273	0	0.529412	12.0801	1.22525	1	5.68478	0.57659	0.470588	157.409
1818	DEAD	tRNA_anti	7577	183	1	0.539424	127.187	1.86641	1	58.5791	0.859623	0.460576	157.311
1819	CH	AhpC-TSA	2228	110	0	0.42515	278.467	2.48597	0.998649	160.077	1.42906	0.574073	157.196
1820	CH	1-cysPrx_C	2228	110	0	0.42515	278.467	2.48597	0.998649	160.077	1.42906	0.574073	157.196
1821	KH_1	SH3_2	1326	156	0	0.850202	180.149	6.7258	0.999856	26.9859	1.00751	0.149776	157.171
1822	Hist_deacetyl	SWIRM	1232	13	0	0.387191	788.468	19.728	0.633367	483.18	12.0895	0.388133	157.164
1823	AAA	HSA	4084	86	0	0.386364	293.223	2.97677	0.954338	179.932	1.82666	0.585617	157.092
1824	UCH	PWI	373	33	0	0.540146	83.8414	10.3402	1	38.5548	4.75499	0.459854	156.915
1825	HA2	HATPase_c	2015	42	0	0.415525	1995.36	6.38484	0.999863	1166.24	3.73178	0.584395	156.735
1826	RRM_1	Fibrillarin	4163	164	1	0.574837	110.508	2.24676	0.957847	46.984	0.955237	0.407241	156.659
1827	zf-RanBP	Ran_BP1	576	34	1	0.607914	273.482	11.7354	0.983303	107.229	4.6013	0.385539	156.444
1828	G-patch	Surp	723	41	0	0.435583	188.412	6.74547	0.984732	106.343	3.80726	0.5558	156.098
1829	FHA	CH	1777	132	0	0.588994	147.703	2.86902	0.999974	60.7069	1.17918	0.410995	155.652
1830	Pkinase	UQ_con	1854	238	1	0.613445	35.4501	1.69032	1	13.7034	0.653401	0.386555	155.51
1831	FKBP_C	Drf_GBD	323	13	0	0.657143	799.23	34.7777	0.991722	274.022	11.9238	0.340019	155.009
1832	FKBP_C	Drf_FH3	323	13	0	0.657143	799.23	34.7777	0.991722	274.022	11.9238	0.340019	155.009
1833	Histone	NUC194	670	17	0	0.521368	400.794	19.045	0.9709	191.833	9.11557	0.464704	154.965
1834	KH_1	IQ	2542	81	0	0.344017	922.927	2.91509	1	605.424	1.91225	0.655983	154.892
1835	Mov34	dsrm	834	31	0	0.421369	1220.31	8.62392	0.963686	706.11	4.99007	0.557619	154.692
1836	BAR	RRM_1	1572	239	0	0.863636	118.092	4.74225	1	16.1035	0.64667	0.136364	154.554
1837	WD40	Med20	199	27	0	0.468354	83.7581	10.7406	1	44.5296	5.71021	0.531646	154.176
1838	Sec23_helical	Sec23_helical	62	13	1	0.5	284.451	23.6899	0.960419	142.226	11.8449	0.48021	153.984
1839	Sec23_trunk	Sec23_trunk	62	13	1	0.5	284.451	23.6899	0.960419	142.226	11.8449	0.48021	153.984
1840	zf-Sec23_Sec24	zf-Sec23_Sec24	62	13	1	0.5	284.451	23.6899	0.960419	142.226	11.8449	0.48021	153.984
1841	Sec23_BS	Sec23_BS	62	13	0	0.5	284.451	23.6899	0.960419	142.226	11.8449	0.48021	153.984
1842	AAA	XPG_N	2376	64	0	0.539531	142.506	5.22056	1	65.6194	2.40391	0.460469	153.85
1843	AAA	XPG_I	2376	64	0	0.539531	142.506	5.22056	1	65.6194	2.40391	0.460469	153.85
1844	DEAD	ADH_zinc_N	5418	117	0	0.446843	373.76	2.37509	1	206.748	1.3138	0.553157	153.714
1845	SAM_1	Helicase_C	4577	505	0	0.721739	64.4089	1.09388	1	17.9225	0.304383	0.278261	153.714
1846	RRM_1	Nol1_Nop2_Fmu	6840	292	0	0.560563	224.951	1.19748	1	98.8517	0.526217	0.439437	153.655
1847	zf-CCCH	zf-RanBP	1545	55	0	0.532819	132.57	5.97952	0.994192	61.9343	2.79352	0.464468	153.644
1848	TPR_1	zf-RanBP	1448	125	1	0.607914	62.2323	3.12983	0.99989	24.4004	1.22716	0.392043	153.396
1849	Ank	Chromo	1241	136	0	0.613636	56.794	2.91299	1	21.9431	1.12547	0.386364	153.064
1850	RRM_1	Calponin	5069	259	0	0.723164	154.319	2.13361	0.999559	42.7211	0.590659	0.276714	152.981
1851	WD40	RNA_pol_L	2707	145	0	0.512894	110.039	2.16315	1	53.6008	1.05368	0.487106	152.784
1852	MBD	ELM2	364	22	0	0.594203	254.719	17.1026	1	103.364	6.94017	0.405797	152.684
1853	Adaptin_N	Alpha_adaptinC2	211	38	1	0.655738	39.3247	11.6689	0.994465	13.538	4.01715	0.342357	152.652
1854	DEAD	Ndr	7366	84	0	0.341837	673.992	2.76109	0.968898	443.597	1.81725	0.637693	152.649
1855	HEAT	BRCT	3835	122	0	0.435125	395.004	2.21407	1	223.128	1.25068	0.564875	152.583
1856	Helicase_C	Ribonuc_red_sm	4178	105	1	0.553869	111.381	3.25561	0.990177	49.6907	1.45243	0.441748	152.505
1857	WD40	Ku	5220	213	1	0.557292	138.398	1.61347	1	61.2697	0.714299	0.442708	152.146
1858	WD40	Ku_C	5220	213	0	0.557292	138.398	1.61347	1	61.2697	0.714299	0.442708	152.146
1859	WD40	Ku_N	5220	213	0	0.557292	138.398	1.61347	1	61.2697	0.714299	0.442708	152.146
1860	DEAD	PCI	4863	387	0	0.752809	34.8011	1.59003	1	8.60253	0.39304	0.247191	152.106
1861	Pkinase	PCMT	2115	223	0	0.767857	30.5887	2.9347	1	7.10094	0.681269	0.232143	151.923
1862	RRM_1	CS	6274	338	0	0.5	162.493	0.897232	1	81.2464	0.448616	0.5	151.632
1863	DEAD	Tubulin_C	4801	112	0	0.513302	238.506	2.78051	0.998443	116.08	1.35327	0.48594	151.566
1864	DEAD	Tubulin	4801	112	0	0.513302	238.506	2.78051	0.998443	116.08	1.35327	0.48594	151.566
1865	Ank	EIN3	77	9	0	0.471264	447.342	31.8345	0.962632	236.526	16.832	0.508978	151.488
1866	SNF2_N	Thioredoxin	1566	99	0	0.763754	223.063	6.44512	1	52.6977	1.52263	0.236246	150.741
1867	PHD	tRNA_anti	1948	101	0	0.585291	84.9733	3.5972	1	35.2392	1.49179	0.414709	150.671
1868	AAA	ubiquitin	4691	238	1	0.669876	212.355	1.91236	0.999926	70.1034	0.631315	0.330099	150.253
1869	RA	Helicase_C	2928	208	0	0.699115	49.5878	2.40024	1	14.9202	0.722196	0.300885	150.217
1870	AAA	GTP_EFTU	4532	154	1	0.394904	251.109	1.61163	1	151.945	0.975192	0.605096	150.18
1871	Helicase_C	FF	713	95	0	0.836066	686.968	9.64122	1	112.618	1.58053	0.163934	150.15
1872	Bromodomain	Cyclin_N	437	44	1	0.752212	106.482	13.7668	0.972629	26.385	3.41125	0.241005	150.095
1873	DEAD	Nol1_Nop2_Fmu	4354	151	1	0.524528	227.739	2.08927	0.999801	108.284	0.993389	0.475377	150.002
1874	FHA	Histone	1555	100	1	0.495277	301.702	2.96809	0.99926	152.276	1.49806	0.50435	149.807
1875	PH	U-box	575	49	0	0.60804	440.17	7.79175	1	172.529	3.05405	0.39196	149.649
1876	Pkinase	Ras	2343	370	1	0.743017	20.3467	1.57371	1	5.22876	0.404417	0.256983	149.634
1877	WD40	Elongin_A	1975	92	1	0.457045	76.8105	2.98904	1	41.7047	1.62291	0.542955	149.308
1878	HMG_box	zf-CCCH	1591	69	0	0.471538	178.731	4.09425	0.999837	94.4524	2.16366	0.528376	149.292
1879	DUF1605	HATPase_c	2009	40	0	0.415525	1995.36	6.38484	0.999863	1166.24	3.73178	0.584395	149.271
1880	WD40	tRNA_anti	4016	277	1	0.619048	73.8308	1.41424	0.999054	28.126	0.538759	0.380592	149.236
1881	AAA	Topoisom_I	3485	60	0	0.320119	565.922	3.65813	0.996045	384.759	2.48709	0.677192	149.226
1882	AAA	Topoisom_I_N	3485	60	0	0.320119	565.922	3.65813	0.996045	384.759	2.48709	0.677192	149.226
1883	AAA	ELM2	6343	156	0	0.39096	306.337	1.56647	0.985305	186.571	0.954043	0.600091	148.831
1884	Pkinase	cNMP_binding	336	51	1	0.769231	53.9153	12.6293	1	12.442	2.91444	0.230769	148.637
1885	DEAD	LisH	3519	193	0	0.692086	68.2205	2.50055	0.998092	21.006	0.769954	0.307326	148.601
1886	Helicase_C	DUF902	422	56	0	0.864865	197.13	19.6254	0.99979	26.6392	2.65208	0.135107	148.517
1887	Helicase_C	KAT11	422	56	0	0.864865	197.13	19.6254	0.99979	26.6392	2.65208	0.135107	148.517
1888	Helicase_C	zf-TAZ	422	56	0	0.864865	197.13	19.6254	0.99979	26.6392	2.65208	0.135107	148.517
1889	Helicase_C	KIX	422	56	0	0.864865	197.13	19.6254	0.99979	26.6392	2.65208	0.135107	148.517
1890	Helicase_C	Creb_binding	422	56	0	0.864865	197.13	19.6254	0.99979	26.6392	2.65208	0.135107	148.517
1891	FHA	Rad50_zn_hook	494	17	0	0.623318	437.816	23.1764	0.995682	164.917	8.73013	0.375055	148.412
1892	WD40	DZF	5049	263	0	0.472492	117.161	1.0691	1	61.8034	0.563959	0.527508	148.321
1893	Bromodomain	BRCT	3326	134	0	0.38809	278.028	1.806	1	170.128	1.10511	0.61191	148.085
1894	TBC	HECT	209	30	0	0.777778	527.616	22.2033	0.965828	117.248	4.93407	0.214628	148.022
1895	RRM_1	La	2652	267	1	0.764706	30.8335	2.35387	0.999999	7.25493	0.553853	0.235294	147.879
1896	SNF2_N	BRCT	6288	171	0	0.38809	278.028	1.41323	0.999109	170.128	0.86477	0.611364	147.876
1897	CH	Septin	3126	164	0	0.384505	269.906	1.46441	1	166.126	0.901338	0.615495	147.819
1898	WD40	Not1	3123	112	1	0.549234	137.523	2.9272	0.999606	61.9908	1.31948	0.450588	147.782
1899	Pkinase	Rep_fac_C	6979	397	0	0.658854	100.596	1.0896	1	34.3178	0.371714	0.341146	147.571
1900	RRM_1	Utp12	4611	212	0	0.583012	64.7307	1.66917	1	26.992	0.696023	0.416988	147.557
1901	PrmA	RRM_1	1157	133	0	0.79021	258.691	5.28711	0.999979	54.2708	1.10918	0.209786	147.522
1902	WD40	FERM_C	1563	183	0	0.692308	19.7535	2.6174	0.999771	6.07801	0.805353	0.307622	147.38
1903	zf-MYND	RRM_1	3088	160	0	0.675799	143.449	2.84077	1	46.5062	0.92098	0.324201	147.357
1904	RRM_1	Ldh_1_N	11115	323	0	0.546875	186.994	1.00567	1	84.7315	0.455695	0.453125	147.189
1905	RRM_1	Ldh_1_C	11115	323	0	0.546875	186.994	1.00567	1	84.7315	0.455695	0.453125	147.189
1906	RFX_DNA_binding	BAH	788	28	0	0.572901	159.52	12.2997	0.987995	68.1309	5.25317	0.421971	147.089
1907	RhoGEF	PBD	259	23	0	0.515152	255.599	13.1827	0.990726	123.927	6.39163	0.480352	147.007
1908	PH	PBD	237	23	1	0.515152	255.599	13.1827	0.992778	123.927	6.39163	0.481347	147.007
1909	KH_1	GTF2I	3090	32	0	0.190053	4282.49	5.67094	0.975417	3468.59	4.59316	0.790036	146.981
1910	WD40	Ldh_1_C	3980	246	0	0.620081	60.012	1.57167	0.999902	22.7997	0.597107	0.379881	146.888
1911	WD40	Ldh_1_N	3980	246	0	0.620081	60.012	1.57167	0.999902	22.7997	0.597107	0.379881	146.888
1912	WD40	Collagen	279	39	1	0.74026	173.505	14.4942	0.990536	45.0663	3.76473	0.257282	146.825
1913	HMG_box	Proteasome	1087	113	0	0.706667	27.7794	4.42555	1	8.14862	1.29816	0.293333	146.692
1914	adh_short	RRM_1	5445	393	0	0.555556	59.6885	0.838955	0.999876	26.5282	0.372869	0.444389	146.537
1915	PHD	HA2	3002	137	0	0.428571	251.871	1.87172	1	143.926	1.06956	0.571429	146.529
1916	PHD	DUF1605	3002	137	0	0.428571	251.871	1.87172	1	143.926	1.06956	0.571429	146.529
1917	Pkinase	BTB	1376	195	0	0.690544	39.8137	2.42603	1	12.3206	0.750749	0.309456	146.396
1918	COMPASS-Shg1	RRM_1	300	48	0	0.571429	12.2974	7.11479	0.999534	5.2703	3.0492	0.428372	146.361
1919	PH	IBN_N	1725	160	0	0.438402	216.817	1.62859	1	121.764	0.914611	0.561598	146.338
1920	WD40	eIF-3c_N	302	37	0	0.731343	78.0459	14.7152	1	20.9676	3.95335	0.268657	146.274
1921	Pkinase	dsrm	2558	239	1	0.625	72.312	1.62715	0.999999	27.117	0.610182	0.375	145.834
1922	RhoGEF	SNF2_N	3342	210	0	0.464583	193.695	1.29641	1	103.708	0.694118	0.535417	145.765
1923	MBD	GATA	505	21	0	0.594203	452.924	17.1026	0.950878	183.795	6.94017	0.385863	145.744
1924	Kinesin	zf-RanBP	3443	138	0	0.459566	213.902	1.95274	1	115.6	1.05533	0.540434	145.635
1925	Cullin	Helicase_C	5743	356	0	0.709402	57.8388	1.40482	1	16.8078	0.408239	0.290598	145.333
1926	DEAD	Cse1	5593	125	0	0.491954	221.677	2.28805	0.989917	112.622	1.16243	0.502923	145.304
1927	Pkinase	Pyridoxal_deC	1128	87	1	0.545894	50.1402	3.67241	1	22.769	1.66766	0.454106	145.087
1928	AAA	DUF618	6769	148	0	0.409692	326.527	1.65831	1	192.752	0.978916	0.590308	144.88
1929	Peptidase_M24	HMG_box	334	21	0	0.556757	192.025	15.5602	0.999624	85.114	6.89697	0.443077	144.836
1930	Arf	RRM_1	7603	523	0	0.727273	51.0485	1.01455	1	13.9223	0.276695	0.272727	144.712
1931	BRCT	HATPase_c	3776	60	0	0.300509	2319.33	3.44782	0.999898	1622.35	2.41172	0.699419	144.703
1932	AAA	PARP	5323	82	0	0.287445	660.195	2.47615	1	470.425	1.76439	0.712555	144.68
1933	ABC_tran	Helicase_C	3772	248	1	0.638989	47.761	1.61546	1	17.2423	0.583199	0.361011	144.633
1934	RRM_1	Tubulin_C	6389	242	0	0.524673	171.8	1.25214	1	81.6613	0.595175	0.475327	144.032
1935	RRM_1	Tubulin	6389	242	0	0.524673	171.8	1.25214	1	81.6613	0.595175	0.475327	144.032
1936	zf-C2H2	Amino_oxidase	262	29	0	0.696203	317.091	16.3481	0.952217	96.3316	4.96652	0.289281	144.029
1937	WD40	Adaptin_N	2830	346	1	0.683168	35.4138	1.3088	0.999988	11.2202	0.41467	0.316828	143.476
1938	HATPase_c	DNA_gyraseB	1252	18	1	0.248464	8231.31	10.6018	0.988832	6186.13	7.96764	0.743143	143.418
1939	HATPase_c	DNA_topoisoIV	1252	18	1	0.248464	8231.31	10.6018	0.988832	6186.13	7.96764	0.743143	143.418
1940	HATPase_c	DTHCT	1252	18	0	0.248464	8231.31	10.6018	0.988832	6186.13	7.96764	0.743143	143.418
1941	Helicase_C	Not1	8039	80	0	0.353241	1048.31	2.76865	0.990531	678.003	1.79065	0.640635	143.252
1942	C1_1	HATPase_c	1858	51	0	0.351643	1535.61	4.33104	0.977902	995.624	2.80806	0.634029	143.211
1943	zf-C3HC4	Myb_DNA-binding	1454	111	0	0.608897	152.428	3.29039	0.997312	59.6151	1.28688	0.390052	142.844
1944	WD40	DSHCT	2303	110	0	0.529825	218.113	2.74884	0.998621	102.551	1.29244	0.469527	142.168
1945	2-oxoacid_dh	E3_binding	800	9	1	0.320236	3188.68	23.1488	0.870255	2167.55	15.7357	0.591568	141.622
1946	DEAD	XPG_I	4425	113	0	0.479049	138.153	2.40204	1	71.971	1.25134	0.520951	141.402
1947	DEAD	XPG_N	4425	113	1	0.479049	138.153	2.40204	1	71.971	1.25134	0.520951	141.402
1948	ArfGap	Bromodomain	766	73	0	0.689231	181.074	6.22803	0.999839	56.2721	1.93548	0.310719	141.29
1949	HMG_box	HDAC_interact	289	19	0	0.75641	356.015	30.5058	0.982083	86.7216	7.4309	0.239225	141.187
1950	DEAD	Xpo1	5616	143	0	0.407906	311.468	1.66687	1	184.419	0.986945	0.592094	141.133
1951	Pkinase	PROCT	1349	99	0	0.620981	86.0831	3.76094	0.999841	32.6271	1.42546	0.378958	141.121
1952	Pkinase	PROCN	1349	99	0	0.620981	86.0831	3.76094	0.999841	32.6271	1.42546	0.378958	141.121
1953	Pkinase	U6-snRNA_bdg	1349	99	0	0.620981	86.0831	3.76094	0.999841	32.6271	1.42546	0.378958	141.121
1954	Pkinase	RRM_4	1349	99	0	0.620981	86.0831	3.76094	0.999841	32.6271	1.42546	0.378958	141.121
1955	Pkinase	U5_2-snRNA_bdg	1349	99	0	0.620981	86.0831	3.76094	0.999841	32.6271	1.42546	0.378958	141.121
1956	Pkinase	PRO8NT	1349	99	0	0.620981	86.0831	3.76094	0.999841	32.6271	1.42546	0.378958	141.121
1957	Pkinase_C	DEAD	3144	303	0	0.72	177.907	1.66232	1	49.8138	0.46545	0.28	141.031
1958	PH	zf-RanBP	1626	156	0	0.513973	97.6865	1.86	1	47.4782	0.904011	0.486027	141.026
1959	GTP_EFTU	UCH	404	43	0	0.601236	202.405	8.22283	1	80.7119	3.27897	0.398764	140.996
1960	HEAT	B-block_TFIIIC	692	17	0	0.550816	115.619	18.4507	0.99362	51.9343	8.28778	0.446318	140.892
1961	RRM_1	RFC1	9113	113	0	0.328546	368.456	1.85659	0.981981	247.401	1.24662	0.659355	140.868
1962	GTP_EFTU_D2	Sec63	550	8	0	0.302152	1871.84	25.2185	0.957013	1306.26	17.5987	0.66785	140.789
1963	SNF2_N	Daxx	55	10	0	0.478261	269.003	26.9819	0.993986	140.349	14.0775	0.518602	140.775
1964	HEAT	PIP5K	40	7	0	0.560976	226.399	45.8034	0.970448	99.3948	20.1088	0.42605	140.762
1965	WD40	2-Hacid_dh_C	2442	137	1	0.605634	90.3391	2.60391	0.999958	35.6267	1.02689	0.39435	140.685
1966	WD40	2-Hacid_dh	2442	137	1	0.605634	90.3391	2.60391	0.999958	35.6267	1.02689	0.39435	140.685
1967	Helicase_C	MAT1	131	27	0	0.657143	103.166	15.1943	0.959573	35.3712	5.20948	0.328997	140.656
1968	Helicase_C	JmjN	1532	210	0	0.73913	67.0717	2.56702	1	17.497	0.669656	0.26087	140.628
1969	Bromodomain	HATPase_c	3368	92	0	0.415179	778.118	2.61272	1	455.06	1.52798	0.584821	140.574
1970	PH	Prp19	551	46	0	0.60804	440.17	7.79175	0.999974	172.529	3.05405	0.39195	140.486
1971	KH_1	Septin	5537	100	0	0.358862	697.554	2.19097	0.993659	447.228	1.40471	0.637073	140.471
1972	RhoGEF	Myb_DNA-binding	1928	126	0	0.506151	157.381	2.25402	1	77.7226	1.11315	0.493849	140.256
1973	Pkinase	RIIa	327	48	1	0.769231	53.9153	12.6293	0.999558	12.442	2.91444	0.230667	139.893
1974	SH2	zf-RanBP	687	69	0	0.769912	387.825	8.79537	0.985329	89.2341	2.02371	0.226713	139.636
1975	KH_1	RasGAP	3023	73	0	0.344017	922.927	2.91509	0.99485	605.424	1.91225	0.652604	139.594
1976	DEAD	UBA	5865	316	0	0.702564	267.595	1.48321	1	79.5923	0.441161	0.297436	139.407
1977	WD40	Biotin_lipoyl	4274	345	0	0.703349	238.045	1.36098	1	70.6163	0.403735	0.296651	139.289
1978	RRM_1	Ded_cyto	2468	321	0	0.841584	64.5913	2.73549	1	10.2323	0.433346	0.158416	139.104
1979	E1-E2_ATPase	RRM_1	509	120	0	0.578947	6.44206	2.74634	1	2.71245	1.15635	0.421053	138.762
1980	WD40	Cse1	2878	191	0	0.628346	66.0702	1.95287	0.999999	24.5552	0.725791	0.371653	138.626
1981	PHD	Rep_fac_C	5906	113	0	0.36775	385.342	1.93825	0.960792	243.633	1.22546	0.60746	138.477
1982	zf-C3HC4	UBA	473	48	1	0.666667	108.828	8.65232	1	36.276	2.88411	0.333333	138.437
1983	Biotin_lipoyl	Carboxyl_trans	184	21	1	0.4	1027.88	10.983	0.999684	616.731	6.58981	0.59981	138.386
1984	AAA	PA28_alpha	1961	67	0	0.631086	401.866	5.59654	1	148.254	2.06464	0.368914	138.331
1985	AAA	PA28_beta	1961	67	0	0.631086	401.866	5.59654	1	148.254	2.06464	0.368914	138.331
1986	dsrm	HATPase_c	1598	37	0	0.415525	1995.36	6.38484	0.999015	1166.24	3.73178	0.583899	138.076
1987	LRR_1	adh_short	392	53	0	0.375	46.2283	4.16698	0.99905	28.8927	2.60436	0.624406	138.031
1988	Helicase_C	DUF699	6574	78	0	0.390668	488.175	2.90262	0.891123	297.461	1.76866	0.54299	137.955
1989	Helicase_C	DUF1726	6574	78	0	0.390668	488.175	2.90262	0.891123	297.461	1.76866	0.54299	137.955
1990	GTP_EFTU	U5_2-snRNA_bdg	432	7	0	0.338618	1695.03	29.7917	0.956804	1121.06	19.7037	0.632812	137.926
1991	GTP_EFTU	RRM_4	432	7	0	0.338618	1695.03	29.7917	0.956804	1121.06	19.7037	0.632812	137.926
1992	GTP_EFTU	U6-snRNA_bdg	432	7	0	0.338618	1695.03	29.7917	0.956804	1121.06	19.7037	0.632812	137.926
1993	GTP_EFTU	PROCN	432	7	0	0.338618	1695.03	29.7917	0.956804	1121.06	19.7037	0.632812	137.926
1994	GTP_EFTU	PROCT	432	7	0	0.338618	1695.03	29.7917	0.956804	1121.06	19.7037	0.632812	137.926
1995	GTP_EFTU	PRO8NT	432	7	0	0.338618	1695.03	29.7917	0.956804	1121.06	19.7037	0.632812	137.926
1996	LIM	AAA	5543	299	0	0.516193	208.049	0.953139	1	100.655	0.461135	0.483807	137.879
1997	Pkinase	Rad50_zn_hook	1464	104	1	0.672727	73.3392	4.03745	0.999833	24.0019	1.32135	0.327218	137.42
[truncated: 5,289 more rows]
